# Supplementary material for: Traumatic injury compromises nucleocytoplasmic transport and leads to TDP-43 pathology
Source: eLife. 2021 Jun 1;10:e67587. doi: 10.7554/eLife.67587 (PMC8169113; doi:10.7554/eLife.67587)
Supplement: Supplementary file 1. [file elife-67587-supp1.xlsx]

## Sheet: Proteomics Analysis
Accession	Description	Gene name	Sum (Coverage)	Sum (# Proteins)	Sum (# Unique Peptides)	Sum (# PSMs)	Fold Change	LOG2 (Fold Change)	p-value	–log10 (p-value)		–LOG10(P-Values) for UP GO Terms ->	Nuclear Pore	Proteosome	Cellular amino acid biosynthetic process	Oxidative Phosphorylation (Mitochondria and V-ATPase	Protein Folding	Ubiquitin-dependent Protein Process	Microtubule	Ser/Thr Phosphatase	Mitochondria	Golgi vesicle transport	Translation Initiation Factor	response to oxidative stress	neurotransmitter transport		–LOG10(P-values) for DOWN GO terms ->	Glutamate-cysteine ligase Complex	Myosin Complex	Nucleolus	Peptidyl-prolyl cis-trans isomerase	Long-chain fatty acid-CoA ligase	Sodium ion Transmembrane transporter
A0A023GQ99	CG10341, isoform C GN=CG10341	A0A023GQ99_DROME	0.1456	2	6	28	1	0	1	0
A1YK02	Nup75 GN=Nup75	A1YK02_DROME	0.1722	1	10	38	3.88889	1.95936	0.0473831	1.32438			1.32438
A1Z6E6	D4, isoform C GN=d4	A1Z6E6_DROME	0.2283	3	11	45	1.33333	0.415037	0.335761	0.47397
A1Z6H4	RE52822p GN=vlc	A1Z6H4_DROME	0.1115	3	5	27	1.46667	0.552541	0.0414941	1.38201																						1.38201
A1Z6I7	Bub1-related kinase GN=BubR1	A1Z6I7_DROME	0.1438	1	17	61	1.36111	0.444785	0.222626	0.652425
A1Z6L9	FI21274p1 GN=Trap1	A1Z6L9_DROME	0.1983	1	11	101	1.77083	0.824428	0.148843	0.827272							0.827272
A1Z6M6	DNA polymerase interacting tpr containing protein of 47kD GN=Dpit47	A1Z6M6_DROME	0.154	1	6	25	2.44444	1.28951	0.231395	0.635646
A1Z6S0	CG33558, isoform C GN=mim	A1Z6S0_DROME	0.0794	2	3	40	1.88889	0.917538	0.118713	0.925501
A1Z6S6	RE54322p GN=vimar	A1Z6S6_DROME	0.2019	2	1	71	1.81818	0.862496	0.00357597	2.44661
A1Z6S7	FI02061p GN=vimar	A1Z6S7_DROME	0.2031	2	1	65	1.63636	0.710493	0.0329657	1.48194
A1Z6X6	CG1707 GN=CG1707	A1Z6X6_DROME	0.2273	1	3	25	1.05556	0.0780025	0.776448	0.109888
A1Z6Z7	CG1620, isoform A GN=CG1620	A1Z6Z7_DROME	0.2662	2	10	69	1.10417	0.142958	0.657938	0.181815
A1Z713	Vacuolar protein sorting 13 GN=Vps13	A1Z713_DROME	0.1195	1	41	173	0.977273	-0.0331669	0.643762	0.191275
A1Z784	CG11198, isoform A GN=ACC	A1Z784_DROME	0.1761	3	38	174	0.955556	-0.0655883	0.724605	0.139899
A1Z7C4	CG33087 GN=LRP1	A1Z7C4_DROME	0.0604	1	23	66	0.888889	-0.169925	0.75454	0.122318
A1Z7H3	Lethal (2) 44DEa, isoform C GN=Acsl	A1Z7H3_DROME	0.2857	3	18	109	0.802083	-0.318176	0.231084	0.636231
A1Z7J7	Sec31, isoform A GN=Sec31	A1Z7J7_DROME	0.0927	2	11	55	1.19444	0.25634	0.229094	0.639987
A1Z7K8	CG8235 GN=CG8235	A1Z7K8_DROME	0.356	1	10	77	1.17647	0.234465	0.282012	0.549732
A1Z7P1	Phosphomannomutase 45A, isoform A GN=Pmm45A	A1Z7P1_DROME	0.1573	2	8	28	2	1	0.184281	0.73452
A1Z7S0	Receptor mediated endocytosis 8 GN=Rme-8	A1Z7S0_DROME	0.0947	1	19	66	1.2381	0.308122	0.320591	0.494048
A1Z7V2	Bruchpilot, isoform F GN=brp	A1Z7V2_DROME	0.14	1	1	76	1.07407	0.103093	0.75454	0.122318
A1Z813	Sec24 GN=Sec24AB	A1Z813_DROME	0.0718	1	7	20	1.33333	0.415037	0.733102	0.134835
A1Z843	CG1371 GN=CG1371	A1Z843_DROME	0.0767	1	8	29	0.545455	-0.874469	0.0421941	1.37475
A1Z847	CG2269, isoform B GN=CG2269	A1Z847_DROME	0.1149	2	8	31	4.83333	2.27302	0.0380322	1.41985
A1Z877	LP19846p GN=Ndg	A1Z877_DROME	0.2259	2	26	144	1.26667	0.341037	0.113532	0.944883
A1Z8G0	Skiff, isoform A GN=metro	A1Z8G0_DROME	0.1597	3	8	23	3.5	1.80735	0.00704706	2.15199
A1Z8M2	Toutatis, isoform A GN=tou	A1Z8M2_DROME	0.0987	3	22	74	0.964912	-0.0515303	0.806961	0.0931476
A1Z8P9	Nucleoprotein TPR GN=Mtor	TPR_DROME	0.4156	1	92	740	1.09249	0.127614	0.00330285	2.48111			2.48111
A1Z8Q2	CG13185, isoform B GN=CG13185	A1Z8Q2_DROME	0.039	2	17	52	0.904762	-0.14439	0.733102	0.134835
A1Z8R2	CG8290, isoform A GN=CG8290	A1Z8R2_DROME	0.1009	2	10	45	1.54167	0.624491	0.0473831	1.32438
A1Z8S6	Pds5 GN=pds5	A1Z8S6_DROME	0.0665	1	9	29	1.04762	0.0671142	0.904109	0.0437793
A1Z8U0	Pre-mRNA processing factor 8 GN=Prp8	A1Z8U0_DROME	0.1665	1	42	201	1.0922	0.127235	0.731113	0.136015
A1Z8U9	Ribosomal protein S11, isoform B GN=RpS11	A1Z8U9_DROME	0.4156	1	1	80	1.07018	0.0978473	0.818177	0.0871526
A1Z909	CG8545 GN=CG8545-RA	A1Z909_DROME	0.1785	1	15	87	0.702381	-0.509674	0.0460042	1.3372
A1Z928	Sin3A, isoform D GN=Sin3A	A1Z928_DROME	0.1833	2	1	133	1.14444	0.194647	0.563045	0.249457
A1Z934	CG8778 GN=CG8778	A1Z934_DROME	0.3445	1	9	48	1.66667	0.736966	0.133975	0.872978
A1Z944	No extended memory, isoform B GN=nemy	A1Z944_DROME	0.2252	8	12	57	2.04167	1.02975	0.165883	0.780198
A1Z992	CG33138 GN=AGBE	A1Z992_DROME	0.2131	1	15	82	0.805556	-0.311944	0.328524	0.483433
A1Z9A8	Protein PTCD3 homolog, mitochondrial GN=CG4679	PTCD3_DROME	0.1104	1	7	31	0.814815	-0.295456	0.494743	0.30562
A1Z9D4	Centrosomin, isoform D GN=cnn	A1Z9D4_DROME	0.1248	7	13	47	0.871795	-0.197939	0.611866	0.213344																			0.213344
A1Z9E2	Protein lin-54 homolog GN=mip120	LIN54_DROME	0.3211	3	26	139	1.11458	0.156504	0.387355	0.411891
A1Z9E3	Elongation factor Tu GN=EfTuM	A1Z9E3_DROME	0.2536	1	10	84	1.53333	0.616671	0.0300197	1.52259
A1Z9G2	CG6197 GN=fand	A1Z9G2_DROME	0.145	1	13	49	0.923077	-0.115477	0.659743	0.180626
A1Z9J3	Short stop, isoform H GN=shot	A1Z9J3_DROME	0.2395	8	80	841	0.976636	-0.0341079	0.645124	0.190357
A1Z9K8	LD13733p GN=Prosap	A1Z9K8_DROME	0.0738	1	11	38	0.818182	-0.289507	0.481618	0.317297
A1Z9L3	FI05376p GN=pea	A1Z9L3_DROME	0.0982	1	11	33	0.888889	-0.169925	0.762542	0.117736
A1Z9M5	CG30069 GN=CG30069	A1Z9M5_DROME	0.2323	1	51	312	0.784946	-0.349334	0.00950977	2.02183
A1Z9S6	Su(Var)2-HP2, isoform A GN=Su(var)2-HP2	A1Z9S6_DROME	0.0651	2	16	38	0.269841	-1.88982	0.00107815	2.96732
A1ZA47-2	Isoform A of PDZ and LIM domain protein Zasp GN=Zasp52 - [ZASP_DROME]	ZASP_DROME	0.1221	8	11	32	0.851852	-0.231326	0.693239	0.159117
A1ZAB5	Protein clueless GN=clu	CLU_DROME	0.1892	1	24	103	1.30159	0.380272	0.265378	0.576135													0.576135
A1ZAJ2	Kinesin-like protein unc-104 GN=unc-104	KIF1A_DROME	0.1587	5	25	114	1.02381	0.0339473	0.891445	0.0499052
A1ZAK4	Dek, isoform A GN=Dek	A1ZAK4_DROME	0.2805	4	18	248	1.1697	0.226135	0.482152	0.316816
A1ZAK7	LD35640p GN=Psi	A1ZAK7_DROME	0.2889	3	21	242	1.0339	0.0480943	0.562764	0.249673
A1ZAN7	RhoGEF2, isoform E GN=RhoGEF2	A1ZAN7_DROME	0.0599	2	12	34	0.925926	-0.111031	0.835767	0.077915
A1ZAU2	CG18431 GN=CG18431-RA	A1ZAU2_DROME	0.2784	1	5	64	1.60606	0.683526	0.0249432	1.60305
A1ZAU8-2	Isoform A of Patronin GN=Patronin - [PTRO_DROME]	PTRO_DROME	0.1338	8	15	61	0.9375	-0.0931094	0.546061	0.262758
A1ZAV3	Misexpression suppressor of ras 4, isoform A GN=MESR4	A1ZAV3_DROME	0.0594	1	9	26	0.75	-0.415037	0.614927	0.211176
A1ZAW0	Dicer-2 GN=Dcr-2	A1ZAW0_DROME	0.1574	1	25	72	1.38095	0.465664	0.190116	0.720981
A1ZAX1	Eukaryotic translation initiation factor 3 subunit C GN=eIF3-S8	EIF3C_DROME	0.3022	1	27	303	1.10952	0.149941	0.258329	0.587826													0.587826
A1ZB79	CG5174, isoform M GN=CG5174	A1ZB79_DROME	0.5842	4	3	82	1.375	0.459432	0.214271	0.669036
A1ZB80	CG5174, isoform A GN=CG5174-RA	A1ZB80_DROME	0.5865	5	2	78	1.52381	0.607683	0.0715191	1.14558
A1ZBB4	CG30122, isoform B GN=CG30122	A1ZBB4_DROME	0.2935	4	33	384	1.01404	0.0201076	0.829785	0.0810343
A1ZBE9	CG15100 GN=CG15100	A1ZBE9_DROME	0.3405	1	27	182	1.07752	0.107714	0.432498	0.364016
A1ZBJ2	CG7461 GN=CG7461	A1ZBJ2_DROME	0.2185	1	13	84	1	0	1	0
A1ZBL7	Par-1, isoform H GN=par-1	A1ZBL7_DROME	0.1762	1	1	60	0.916667	-0.125531	0.704853	0.151902
A1ZBM0	Par-1, isoform F GN=par-1	A1ZBM0_DROME	0.2013	1	4	65	0.651515	-0.618129	0.0604586	1.21854
A1ZBM2	CG11242 GN=TBCB	A1ZBM2_DROME	0.4057	1	9	68	1.41026	0.495957	0.118713	0.925501
A1ZBW6	CG11180 GN=CG11180	A1ZBW6_DROME	0.1598	1	10	27	0.229167	-2.12553	0.00530413	2.27539
A4V110	Calcium/calmodulin-dependent protein kinase I, isoform I GN=CaMKI	A4V110_DROME	0.1282	3	5	25	1.33333	0.415037	0.575462	0.239984
A4V2A4	Mushroom-body expressed, isoform G GN=mub	A4V2A4_DROME	0.2925	9	9	60	1.88889	0.917538	0.0638615	1.19476
A4V364	CG17838, isoform F GN=Syp	A4V364_DROME	0.4216	7	4	181	1.39048	0.475579	0.0615747	1.2106
A8DY44	Nipped-A, isoform D GN=Nipped-A	A8DY44_DROME	0.0536	2	18	42	1.06667	0.0931094	0.842842	0.0742541
A8DY69	CG8709, isoform B GN=Lpin	A8DY69_DROME	0.1382	2	11	86	0.913043	-0.131245	0.652027	0.185735
A8DY79	Bruchpilot, isoform G GN=brp	A8DY79_DROME	0.4272	2	75	641	1.11036	0.151028	0.307516	0.512133
A8DY95	CG11883, isoform C GN=CG11883	A8DY95_DROME	0.1427	3	11	58	0.875	-0.192645	0.37941	0.420891
A8DYD3	Combgap, isoform F GN=cg	A8DYD3_DROME	0.1844	7	13	80	0.826087	-0.275634	0.184281	0.73452
A8DZ29	Eukaryotic translation initiation factor 4G, isoform B GN=eIF4G	A8DZ29_DROME	0.3194	2	47	381	1.29487	0.372809	0.0880887	1.05508													1.05508
A8JNI2	CG7971, isoform F GN=CG7971	A8JNI2_DROME	0.0931	5	13	49	0.833333	-0.263034	0.524426	0.280316
A8JNN5	GTPase activating protein and centrosome-associated ortholog, isoform B GN=GAPcenA	A8JNN5_DROME	0.0896	2	10	37	0.694444	-0.526069	0.203195	0.692088
A8JNQ4	Ataxin-2 binding protein 1, isoform I GN=A2bp1	A8JNQ4_DROME	0.0678	7	1	25	1.33333	0.415037	0.455693	0.341327
A8JNU6	Neural conserved at 73EF, isoform I GN=Nc73EF	A8JNU6_DROME	0.3222	4	3	203	0.967949	-0.0469975	0.821761	0.0852544
A8JQV2	CG17816, isoform E GN=CG17816	A8JQV2_DROME	0.4269	2	1	202	1.26984	0.344648	0.072991	1.13673
A8JQV3	CG17816, isoform G GN=CG17816	A8JQV3_DROME	0.4127	3	1	204	1.24806	0.31969	0.0750098	1.12488
A8JQV8	Polychaetoid, isoform H GN=pyd	A8JQV8_DROME	0.0844	1	2	33	1.5	0.584963	0.0529078	1.27648
A8JRA4	CG6422, isoform C GN=CG6422	A8JRA4_DROME	0.2305	3	15	73	1.40476	0.490326	0.111873	0.951274
A8JRB8	CG5028, isoform C GN=CG5028-RC	A8JRB8_DROME	0.2781	4	10	69	1.4359	0.521953	0.0228908	1.64034
A8JRE3	Without children, isoform B GN=woc	A8JRE3_DROME	0.2601	2	38	251	1.03825	0.0541558	0.805951	0.0936914
A8JTM7	Megalin, isoform A GN=mgl	A8JTM7_DROME	0.0367	1	16	42	0.6	-0.736966	0.162716	0.788569
A8JUZ9	CG34417, isoform F GN=CG34417	A8JUZ9_DROME	0.2197	19	57	307	0.803704	-0.315264	0.106389	0.973105
A8JV07	CG9915, isoform B GN=CG9915	A8JV07_DROME	0.1061	1	7	42	0.833333	-0.263034	0.481618	0.317297
A8JV09	Coronin GN=pod1	A8JV09_DROME	0.31	3	34	253	1.32026	0.400824	0.141725	0.848553
A8WHL4	Bonus, isoform B GN=bon	A8WHL4_DROME	0.1244	2	13	47	1.23333	0.302563	0.398509	0.399562
B7YZH7	CG8446, isoform D GN=CG8446-RD	B7YZH7_DROME	0.6714	2	3	33	2.41667	1.27302	0.0023342	2.63186
B7YZQ1	Sterile20-like kinase, isoform F GN=slik	B7YZQ1_DROME	0.1535	4	23	96	1	0	1	0
B7YZQ7	Nucleosome remodeling factor-38kD, isoform B GN=Nurf-38	B7YZQ7_DROME	0.5	2	12	170	1.76543	0.820021	0.0176039	1.75439
B7YZV1	Pde1c, isoform D GN=Pde1c	B7YZV1_DROME	0.1293	8	10	33	0.583333	-0.777608	0.26657	0.574189
B7Z001	CG3523, isoform C GN=CG3523	B7Z001_DROME	0.2748	2	63	384	1.17255	0.229648	0.0948935	1.02276
B7Z002	Kismet, isoform C GN=kis	B7Z002_DROME	0.188	6	76	481	0.863184	-0.21226	0.0827582	1.08219
B7Z026	Dizzy isoform CII GN=PDZ-GEF	B7Z026_DROME	0.0513	3	7	20	0.619048	-0.691878	0.439315	0.357224
B7Z0B8	CG10625, isoform I GN=CG10625	B7Z0B8_DROME	0.1358	3	8	67	1.69697	0.762961	0.297895	0.525937
B7Z0E2	FI18812p1 GN=Unr	B7Z0E2_DROME	0.175	3	16	76	1.25	0.321928	0.460773	0.336513
B7Z0I8	CG42232 GN=CG14896	B7Z0I8_DROME	0.1569	1	42	213	0.588745	-0.764286	0.000524334	3.28039
B7Z0L6	PP2A-B', isoform J GN=PP2A-B'	B7Z0L6_DROME	0.239	5	4	68	1.28571	0.36257	0.228258	0.641574
B7Z0U7	Like-AP180, isoform C GN=lap	B7Z0U7_DROME	0.2243	2	3	112	0.954023	-0.0679041	0.704853	0.151902															0.151902
B7Z0W8	Rugose, isoform M GN=rg	B7Z0W8_DROME	0.0983	8	24	86	0.690476	-0.534336	0.101733	0.992538
B7Z0X1	Serine hydroxymethyltransferase GN=CG3011	B7Z0X1_DROME	0.3298	2	16	89	1.31481	0.39486	0.0553138	1.25717					1.25717
B7Z0Z1	Hangover, isoform C GN=hang	B7Z0Z1_DROME	0.1215	3	19	91	1.11111	0.152003	0.461822	0.335525
B7Z107	CG42376, isoform A GN=cin-RB	B7Z107_DROME	0.5109	1	5	43	1.1	0.137504	0.453253	0.343659
C4NYP8	Hsc70-interacting protein 1 GN=HIP	F10A1_DROME	0.4562	1	15	210	1.29457	0.372477	0.227006	0.643962
C7LAG1	CoRest, isoform G GN=CoRest	C7LAG1_DROME	0.2015	6	16	84	0.939394	-0.0901978	0.806961	0.0931476
D1YSG8	Calcium/calmodulin-dependent protein kinase II, isoform J GN=CaMKII	D1YSG8_DROME	0.3578	5	1	138	1.2	0.263034	0.442728	0.353863
E1JGM9	Par-1, isoform S GN=par-1	E1JGM9_DROME	0.2092	2	1	56	0.911111	-0.134301	0.733102	0.134835
E1JGN7	Bancal, isoform E GN=bl	E1JGN7_DROME	0.3854	5	15	103	1.47368	0.559427	0.0201014	1.69677
E1JGP0	Actin 57B, isoform C GN=Act57B	E1JGP0_DROME	0.4361	3	2	664	1.1039	0.142604	0.530689	0.27516
E1JGX3	Nipped-B, isoform G GN=Nipped-B	E1JGX3_DROME	0.0648	2	13	26	1.83333	0.874469	0.298842	0.524558
E1JGY9	CG33558, isoform D GN=mim	E1JGY9_DROME	0.1653	2	2	37	2.13333	1.09311	0.104907	0.979194
E1JH63	Short stop, isoform O GN=shot	E1JH63_DROME	0.2171	14	3	512	0.969466	-0.0447383	0.343166	0.464495
E1JHJ9	Cytoplasmic linker protein 190, isoform M GN=CLIP-190	E1JHJ9_DROME	0.3489	14	51	255	0.880952	-0.182864	0.171548	0.765615
E1JHM1	Cd GTPase activating protein-related, isoform B GN=CdGAPr	E1JHM1_DROME	0.0684	3	11	33	0.583333	-0.777608	0.140346	0.852799
E1JHT9	Reticulon-like protein GN=Rtnl1	E1JHT9_DROME	0.3514	5	1	46	1.37037	0.454566	0.0735612	1.13335
E1JI64	Sunday driver, isoform D GN=syd	E1JI64_DROME	0.1002	10	10	43	0.769231	-0.378512	0.282012	0.549732
E1JIL4	Chromatin assembly factor 1 subunit, isoform B GN=Caf1	E1JIL4_DROME	0.31	1	1	140	1.17204	0.229026	0.367245	0.435044
E1JIZ0	Scribbled, isoform L GN=scrib	E1JIZ0_DROME	0.14	11	1	95	1.10606	0.14543	0.283538	0.547389
E1JIZ1	Scribbled, isoform J GN=scrib	E1JIZ1_DROME	0.1533	11	1	95	1.10606	0.14543	0.283538	0.547389
E1JJA4	Shibire, isoform L GN=shi	E1JJA4_DROME	0.3726	5	2	283	1.11795	0.160854	0.494279	0.306028
E1JJM0	FI20063p1 GN=Imp	E1JJM0_DROME	0.3362	3	1	138	2.37255	1.24644	0.00106442	2.97289
E1NZB4	Found in neurons, isoform D (Fragment) GN=fne	E1NZB4_DROME	0.4079	5	11	112	1.22222	0.289507	0.269903	0.568792
E2QCF1	ATP citrate lyase, isoform F GN=ATPCL	E2QCF1_DROME	0.2219	1	1	171	1.77778	0.830075	0.0473919	1.3243
E2QCN4	Not1, isoform F GN=Not1	E2QCN4_DROME	0.12	4	29	134	1.0625	0.0874628	0.724605	0.139899
E2QCY9	Synapsin, isoform D GN=Syn	E2QCY9_DROME	0.2815	3	8	151	1.06481	0.0906025	0.627317	0.202513
E2QCZ0	Synapsin, isoform E GN=Syn	E2QCZ0_DROME	0.3082	2	1	121	1.10714	0.146841	0.439085	0.357452
G7H806	CG17454, isoform B GN=CG17454-RA	G7H806_DROME	0.313	2	7	30	0.916667	-0.125531	0.680138	0.167403
H9XVM6	Crk, isoform E GN=Crk	H9XVM6_DROME	0.5361	6	13	78	1.29167	0.369234	0.197473	0.704492
L0MLQ9	eIF4E-Transporter, isoform H GN=4E-T	L0MLQ9_DROME	0.2033	2	16	108	1.10667	0.146221	0.190116	0.720981
L0MPN7	Asator, isoform H GN=Asator	L0MPN7_DROME	0.1702	8	17	64	1.08889	0.122857	0.797039	0.0985207
M9MRD9	CG8552, isoform B GN=CG8552	M9MRD9_DROME	0.1222	3	8	43	1.1	0.137504	0.643762	0.191275
M9MRG2	CG4747, isoform B GN=CG4747	M9MRG2_DROME	0.3201	1	1	110	1.5	0.584963	0.100932	0.995973
M9MRJ4	Muscle-specific protein 300 kDa, isoform G GN=Msp300	M9MRJ4_DROME	0.1602	4	79	566	0.750958	-0.413196	0.00929344	2.03182
M9MRQ6	Sh3beta, isoform E GN=Sh3beta	M9MRQ6_DROME	0.268	3	2	183	1.23077	0.29956	0.433275	0.363236
M9MRX4	Ankyrin 2, isoform U GN=Ank2	M9MRX4_DROME	0.2977	7	50	1256	1.05298	0.0744782	0.170783	0.767555
M9MS72	cAMP-dependent protein kinase R1, isoform X GN=Pka-R1	M9MS72_DROME	0.2357	10	6	31	1.38889	0.473931	0.366297	0.436167
M9MSC9	Ajuba LIM protein, isoform C GN=jub	M9MSC9_DROME	0.1295	4	7	24	2.33333	1.22239	0.0498253	1.30255
M9MSK4	Sh3beta, isoform D GN=Sh3beta	M9MSK4_DROME	0.5741	3	2	181	1.2973	0.375509	0.385217	0.414294
M9MSM4	Nopp140, isoform F GN=Nopp140	M9MSM4_DROME	0.2175	2	5	73	1.01852	0.0264722	0.923347	0.0346351
M9NDA6	Lasp, isoform C GN=Lasp	M9NDA6_DROME	0.2531	4	13	106	1.08	0.111031	0.577758	0.238254
M9NDH5	Beta amyloid protein-like, isoform E GN=Appl	M9NDH5_DROME	0.1529	5	1	46	1.2	0.263034	0.702386	0.153424
M9NDL7	Reps, isoform B GN=Reps	M9NDL7_DROME	0.1116	2	9	42	1.41667	0.5025	0.219944	0.657688
M9NDR2	Bicaudal D, isoform B GN=BicD	M9NDR2_DROME	0.2013	3	14	56	1.10256	0.140863	0.781067	0.107312
M9NDS8	Myosin binding subunit, isoform N GN=Mbs	M9NDS8_DROME	0.0835	6	1	38	0.933333	-0.0995357	0.680138	0.167403
M9NDX3	Topoisomerase 1, isoform D GN=Top1	M9NDX3_DROME	0.1485	5	15	76	1.07407	0.103093	0.797039	0.0985207
M9NE66	Nervous wreck, isoform B GN=nwk	M9NE66_DROME	0.203	3	1	98	0.876543	-0.190103	0.340528	0.467847
M9NEA5	DNA-binding protein SATB GN=ct	M9NEA5_DROME	0.0688	4	10	30	1.09524	0.131245	0.724605	0.139899
M9NEY5	Spinophilin, isoform G GN=Spn	M9NEY5_DROME	0.1726	9	30	159	1.13889	0.187627	0.567122	0.246323
M9NEY8	CG43444, isoform A GN=CG43444	M9NEY8_DROME	0.0483	5	12	49	1.15152	0.203533	0.248831	0.604096
M9NF14	IGF-II mRNA-binding protein, isoform L GN=Imp	M9NF14_DROME	0.3433	3	3	145	2.35185	1.2338	0.000952706	3.02104
M9NF18	CG2247, isoform D GN=CG2247	M9NF18_DROME	0.128	3	12	34	0.925926	-0.111031	0.75454	0.122318
M9NF33	CG7185, isoform B GN=CG7185	M9NF33_DROME	0.2198	2	10	89	1.52083	0.604862	0.0089912	2.04618
M9NFH8	CG9674, isoform F GN=CG9674	M9NFH8_DROME	0.2884	1	1	512	1.16374	0.218772	0.137642	0.861247
M9NG75	CG17233, isoform H GN=CG17233	M9NG75_DROME	0.0805	7	6	27	1.46667	0.552541	0.197473	0.704492
M9NGE4	Mushroom body defect, isoform I GN=mud	M9NGE4_DROME	0.1817	7	17	72	1.16667	0.222392	0.501705	0.299551
M9NGF6	Beta amyloid protein-like, isoform D GN=Appl	M9NGF6_DROME	0.1475	1	1	49	1.02778	0.0395284	0.945285	0.0244372
M9NGK3	Terribly reduced optic lobes, isoform AL GN=trol	M9NGK3_DROME	0.2374	7	2	414	0.887906	-0.171522	0.178229	0.749022
M9NGL3	Terribly reduced optic lobes, isoform AM GN=trol	M9NGL3_DROME	0.2198	18	1	402	0.873874	-0.194503	0.128489	0.891134
M9NH07	Upheld, isoform N GN=up	M9NH07_DROME	0.2893	5	1	70	0.5	-1	0.0230656	1.63704
M9NH51	U2 small nuclear riboprotein auxiliary factor 50, isoform C GN=U2af50	M9NH51_DROME	0.2167	3	6	39	1.83333	0.874469	0.0872942	1.05901
M9PB96	Ribosome biogenesis protein WDR12 homolog GN=CG6724	M9PB96_DROME	0.3493	2	13	50	2.04762	1.03395	0.0464199	1.3333
M9PBF6	Dynamin associated protein 160, isoform G GN=Dap160	M9PBF6_DROME	0.3382	6	34	221	1.0566	0.0794345	0.669276	0.174395
M9PBP3	Cdc42-interacting protein 4, isoform J GN=Cip4	M9PBP3_DROME	0.1578	10	9	42	1.41667	0.5025	0.320591	0.494048
M9PBQ3	Dynein heavy chain 64C, isoform I GN=Dhc64C	M9PBQ3_DROME	0.2152	8	96	423	1.12027	0.163853	0.47669	0.321764
M9PBV6	CG7927, isoform B GN=CG7927	M9PBV6_DROME	0.1011	2	7	32	1.19048	0.251539	0.419753	0.377006
M9PBW9	Rhea, isoform G GN=rhea	M9PBW9_DROME	0.1954	5	47	235	1.01724	0.0246621	0.914978	0.0385895
M9PBZ3	Split ends, isoform H GN=spen	M9PBZ3_DROME	0.0227	8	10	28	0.515152	-0.956931	0.0254739	1.5939
M9PC31	CG3714, isoform G GN=CG3714	M9PC31_DROME	0.1491	4	8	43	1.45833	0.544321	0.0800335	1.09673
M9PC74	CG31650, isoform G GN=CG31650	M9PC74_DROME	0.2566	2	9	65	1.63636	0.710493	0.0176787	1.75255
M9PC84	Muscle-specific protein 300 kDa, isoform L GN=Msp300	M9PC84_DROME	0.12	8	70	450	0.554241	-0.851416	0.00104215	2.98207
M9PC85	X16, isoform B GN=x16	M9PC85_DROME	0.3346	2	8	45	1.0303	0.0430687	0.918272	0.0370286
M9PCJ4	CG8086, isoform M GN=CG8086	M9PCJ4_DROME	0.1925	12	17	79	1.05263	0.0740006	0.625301	0.203911
M9PCT7	Bunched, isoform O GN=bun	M9PCT7_DROME	0.2344	5	1	40	1	0	1	0
M9PCU3	Disabled, isoform I GN=Dab	M9PCU3_DROME	0.1689	9	30	146	1.28889	0.366128	0.388184	0.410963
M9PCX8	Btk family kinase at 29A, isoform H GN=Btk29A	M9PCX8_DROME	0.2263	6	9	33	1.04167	0.0588937	0.923347	0.0346351
M9PD27	Eukaryotic release factor 1, isoform H GN=eRF1	M9PD27_DROME	0.2128	3	8	36	1.38095	0.465664	0.279658	0.553372
M9PD65	Ran GTPase activating protein, isoform C GN=RanGAP	M9PD65_DROME	0.1973	2	11	80	1.57143	0.652077	0.0638615	1.19476
M9PD73	Thioester-containing protein 4, isoform B GN=Tep4	M9PD73_DROME	0.0921	4	12	45	1.80952	0.85561	0.0228908	1.64034
M9PD94	Crooked legs, isoform F GN=crol	M9PD94_DROME	0.1191	2	1	29	0.875	-0.192645	0.767461	0.114944
M9PDB2	Varicose, isoform E GN=vari	M9PDB2_DROME	0.1162	4	7	26	0.75	-0.415037	0.419753	0.377006
M9PDH5	DISCO interacting protein 2, isoform E GN=DIP2	M9PDH5_DROME	0.1709	5	27	120	1.09524	0.131245	0.547162	0.261884
M9PDV6	Fife, isoform B GN=Fife	M9PDV6_DROME	0.1176	3	8	43	0.861111	-0.215729	0.432498	0.364016
M9PDW0	Neuronal synaptobrevin, isoform K GN=nSyb	M9PDW0_DROME	0.632	5	5	36	1.38095	0.465664	0.373771	0.427395
M9PDX2	CG4577, isoform B GN=CG4577	M9PDX2_DROME	0.2085	1	1	51	1.21212	0.277534	0.482152	0.316816
M9PDZ9	Sallimus, isoform V GN=sls	M9PDZ9_DROME	0.0612	16	36	75	0.166667	-2.58496	7.01913e-06	5.15372
M9PE03	Zormin, isoform E GN=zormin	M9PE03_DROME	0.0744	7	23	76	0.768116	-0.380604	0.215165	0.667229
M9PE74	No circadian temperature entrainment, isoform D GN=nocte	M9PE74_DROME	0.2976	2	51	449	1.09206	0.127057	0.335475	0.47434
M9PEB1	CG10289, isoform B GN=CG10289	M9PEB1_DROME	0.1562	3	9	55	1.19444	0.25634	0.491499	0.308478
M9PEB2	Chromodomain-helicase-DNA-binding protein 1, isoform C GN=Chd1	M9PEB2_DROME	0.0505	3	9	27	1.16667	0.222392	0.673752	0.1715
M9PEL3	Quemao, isoform C GN=qm	M9PEL3_DROME	0.2761	2	8	32	2.33333	1.22239	0.0396598	1.40165
M9PEM7	Liquid facets, isoform G GN=lqf	M9PEM7_DROME	0.1921	7	10	54	1.30303	0.381871	0.248831	0.604096
M9PF16	Beta spectrin, isoform B GN=beta-Spec	M9PF16_DROME	0.4792	3	4	1032	1.05938	0.0832191	0.304095	0.51699
M9PF36	CG3529, isoform C GN=CG3529	M9PF36_DROME	0.173	3	7	33	0.888889	-0.169925	0.751687	0.123963
M9PF42	Connector of kinase to AP-1, isoform G GN=Cka	M9PF42_DROME	0.1454	4	9	92	1.06061	0.0848889	0.789506	0.102645
M9PFR6	Multiprotein bridging factor 1, isoform E GN=mbf1	M9PFR6_DROME	0.5851	2	12	86	0.913043	-0.131245	0.453253	0.343659
M9PFW8	CG32165, isoform B GN=CG32165	M9PFW8_DROME	0.1171	4	12	39	1.11111	0.152003	0.707259	0.150421
M9PG32	TBP-associated factor 6, isoform B GN=Taf6	M9PG32_DROME	0.1967	2	10	42	1.22222	0.289507	0.184281	0.73452
M9PG40	CG40045, isoform D GN=CG40045	M9PG40_DROME	0.3533	4	6	38	1.77778	0.830075	0.0230656	1.63704
M9PGG8	CG17493, isoform B GN=CG17493	M9PGG8_DROME	0.3571	1	5	40	1.14815	0.199309	0.315334	0.50123
M9PGW8	Bifocal, isoform D GN=bif	M9PGW8_DROME	0.3067	5	27	135	1.46667	0.552541	0.172636	0.762868
M9PGX2	Pretaporter, isoform D GN=prtp	M9PGX2_DROME	0.4249	2	16	165	1.15315	0.205584	0.459725	0.337502
M9PHB1	Ensconsin, isoform G GN=ens	M9PHB1_DROME	0.2	11	18	125	0.929293	-0.105795	0.197473	0.704492
M9PHK2	Tao, isoform I GN=Tao	M9PHK2_DROME	0.1089	6	12	64	1	0	1	0
M9PHK8	Discs large 1, isoform R GN=dlg1	M9PHK8_DROME	0.1738	7	2	89	1.22807	0.296393	0.306526	0.513533
M9PI17	CG6084, isoform D GN=CG6084	M9PI17_DROME	0.4367	4	14	127	1.43056	0.516576	0.307035	0.512813
M9PI47	Sin3A-associated protein 130, isoform F GN=Sap130	M9PI47_DROME	0.1613	5	12	37	2.13333	1.09311	0.0125287	1.9021
M9PIA6	Mi-2, isoform D GN=Mi-2	M9PIA6_DROME	0.2514	4	41	294	1.00913	0.0131155	0.917324	0.0374771
M9PID3	CG3680, isoform D GN=CG3680	M9PID3_DROME	0.2839	4	21	83	0.654762	-0.610958	0.049333	1.30686
M9PIL3	ADP-ribosylation factor GTPase activating protein 3, isoform G GN=ArfGAP3	M9PIL3_DROME	0.173	5	8	51	1.36667	0.450661	0.251993	0.598612
M9PJ19	Fasciclin 2, isoform D GN=Fas2	M9PJ19_DROME	0.1682	7	13	50	0.647059	-0.628031	0.0908442	1.0417
O01367-2	Isoform Maternal of Protein held out wings GN=how - [HOW_DROME]	HOW_DROME	0.2507	4	7	31	2.25	1.16993	0.0509319	1.29301
O01404	Peptidylglycine alpha-hydroxylating monooxygenase GN=Phm	PHM_DROME	0.1452	1	5	26	2.55556	1.35364	0.0618347	1.20877
O01666	ATP synthase subunit gamma, mitochondrial GN=ATPsyn-gamma	ATPG_DROME	0.5084	1	14	108	1.10667	0.146221	0.610111	0.214591						0.214591
O02193	Males-absent on the first protein GN=mof	MOF_DROME	0.133	1	8	33	1.2381	0.308122	0.406129	0.391336
O02195	Eukaryotic translation initiation factor 3 subunit I GN=Trip1	EIF3I_DROME	0.3834	1	10	181	1.00741	0.0106472	0.92484	0.0339336													0.0339336
O02649	60 kDa heat shock protein, mitochondrial GN=Hsp60	CH60_DROME	0.5044	1	19	379	1.32895	0.410284	0.141694	0.848648							0.848648
O15943-6	Isoform F of Neural-cadherin GN=CadN - [CADN_DROME]	CADN_DROME	0.1153	13	30	128	0.760684	-0.394631	0.283538	0.547389
O16043	Anon1A4 GN=Df31	O16043_DROME	0.9126	1	20	785	1.02245	0.0320338	0.818841	0.0868003
O16797	60S ribosomal protein L3 GN=RpL3	RL3_DROME	0.363	4	19	263	1.03646	0.0516621	0.796674	0.0987196
O17445	60S ribosomal protein L15 GN=RpL15	RL15_DROME	0.2255	1	5	60	1.09524	0.131245	0.797039	0.0985207
O18332	FI01544p GN=Rab1	O18332_DROME	0.3415	5	6	64	1	0	1	0
O18333	GH01619p GN=Rab2	O18333_DROME	0.4648	1	9	50	1.51852	0.602665	0.374817	0.42618
O18335	Drab11 GN=Rab11	O18335_DROME	0.3832	1	9	51	1.21212	0.277534	0.516792	0.286685
O18373	Selenide, water dikinase GN=SelD	SPS1_DROME	0.1583	1	8	39	0.966667	-0.0489096	0.893565	0.0488739					0.0488739
O18388	Importin subunit beta GN=Fs(2)Ket	IMB_DROME	0.0995	1	9	44	1	0	1	0			0
O18404	3-hydroxyacyl-CoA dehydrogenase type-2 GN=scu	HCD2_DROME	0.4039	2	8	92	3.07407	1.62015	0.00173528	2.76063
O18413	26S protease regulatory subunit 8 GN=Rpt6	PRS8_DROME	0.5012	2	16	250	1.56061	0.642106	0.0374729	1.42628				1.42628
O18640	Guanine nucleotide-binding protein subunit beta-like protein GN=Rack1	GBLP_DROME	0.3491	2	12	216	1.51282	0.597241	0.0655677	1.18331
O44081	H/ACA ribonucleoprotein complex subunit 4 GN=Nop60B	DKC1_DROME	0.3031	2	15	104	0.862069	-0.214125	0.159931	0.796069
O44226	Elongin B GN=EloB	O44226_DROME	0.6864	1	7	31	3.11111	1.63743	0.0432434	1.36408
O44386	Integrin alpha-PS3 GN=scb	ITA3_DROME	0.0816	2	8	35	0.833333	-0.263034	0.564648	0.248222
O44434	QKR58E-3 GN=qkr58E-3	O44434_DROME	0.2713	4	8	80	1	0	1	0
O46036-2	Isoform A of C-terminal-binding protein GN=CtBP - [CTBP_DROME]	CTBP_DROME	0.3316	2	11	111	1.72222	0.784271	0.0323536	1.49008
O46037	Vinculin GN=Vinc	VINC_DROME	0.2893	1	25	89	1.22807	0.296393	0.342778	0.464987
O46067	CG2918, isoform B GN=EG:25E8.1	O46067_DROME	0.2925	1	25	221	1.0566	0.0794345	0.633852	0.198012							0.198012
O46106	Splicing factor 3A subunit 3 GN=noi	NOI_DROME	0.1471	1	7	42	0.939394	-0.0901978	0.835767	0.077915
O46231	FI18705p1 GN=tmod	O46231_DROME	0.3678	6	11	73	1.01852	0.0264722	0.950968	0.021834
O46307	CG11417 GN=fs(1)N	O46307_DROME	0.1971	1	13	60	0.916667	-0.125531	0.627766	0.202202
O61231	60S ribosomal protein L10 GN=RpL10	RL10_DROME	0.3257	1	10	146	1.05714	0.0801703	0.591313	0.228183
O61345	Protein penguin GN=pen	PEN_DROME	0.1031	1	7	35	0.833333	-0.263034	0.188027	0.72578
O61360	CG14938-PA, isoform A GN=crol	O61360_DROME	0.1154	6	2	27	0.666667	-0.584963	0.335761	0.47397
O61491-2	Isoform Long of Flotillin-1 GN=Flo-1 - [FLOT1_DROME]	FLOT1_DROME	0.2953	2	12	99	1.16667	0.222392	0.374195	0.426902
O61492-2	Isoform B of Flotillin-2 GN=Flo-2 - [FLOT2_DROME]	FLOT2_DROME	0.2706	8	10	45	1.16667	0.222392	0.657938	0.181815
O61604	Fimbrin GN=Fim	O61604_DROME	0.3813	2	2	197	0.779661	-0.359081	0.00627959	2.20207
O61613	Glycylpeptide N-tetradecanoyltransferase GN=Nmt	NMT_DROME	0.3814	1	14	110	1.26087	0.334419	0.0104017	1.98289
O62530	AP-50, isoform A GN=AP-2mu	O62530_DROME	0.2494	1	12	86	0.861111	-0.215729	0.152822	0.815813															0.815813
O62531	AP-47 GN=AP-1mu	O62531_DROME	0.1972	1	7	28	1.53333	0.616671	0.439315	0.357224															0.357224
O62619-2	Isoform B of Pyruvate kinase GN=PyK - [KPYK_DROME]	KPYK_DROME	0.5879	2	23	282	1.44025	0.526321	0.120845	0.917773
O62621	Coatomer subunit beta' GN=beta'Cop	COPB2_DROME	0.1849	1	16	116	1.15385	0.206451	0.300102	0.522731												0.522731
O76857	BCL7-like GN=BCL7-like	O76857_DROME	0.2532	1	5	27	1.91667	0.938599	0.145752	0.836385
O76861	CG2685-PA GN=CG2685-RA	O76861_DROME	0.1486	1	6	37	1.20833	0.273018	0.540301	0.267364
O76874	CG3777, isoform A GN=EG:125H10.1	O76874_DROME	0.1399	1	9	33	0.888889	-0.169925	0.860118	0.0654419
O76878	RILP-like protein homolog GN=CG11448	RIPL_DROME	0.1828	3	6	26	1.83333	0.874469	0.152822	0.815813
O76902	EG:80H7.5 protein GN=rush	O76902_DROME	0.2595	1	7	45	0.916667	-0.125531	0.643762	0.191275
O76927-2	Isoform E of 40S ribosomal protein S21 GN=RpS21 - [RS21_DROME]	RS21_DROME	0.6667	2	6	122	2.20833	1.14296	0.0115341	1.93802
O76932	Serine/threonine-protein phosphatase 4 catalytic subunit GN=Pp4-19C	PP4C_DROME	0.2704	1	8	53	1.43333	0.519374	0.000386003	3.41341
O76994	GM13959p GN=Ip259	O76994_DROME	0.2008	1	6	31	1.14286	0.192645	0.577758	0.238254
O77051	Transcription factor E2F2 GN=E2f2	E2F2_DROME	0.1514	1	6	25	1.33333	0.415037	0.248831	0.604096
O77410	Eukaryotic translation initiation factor 3 subunit E GN=eIF3-S6	EIF3E_DROME	0.2828	1	13	93	1.01449	0.0207586	0.92484	0.0339336													0.0339336
O77430	HL01263p GN=skpA	O77430_DROME	0.4383	2	8	45	1.80952	0.85561	0.0483948	1.3152
O77727	Keratin, type I cytoskeletal 15 OS=Ovis aries GN=KRT15	K1C15_SHEEP	0.181	12	6	87	0.875	-0.192645	0.654657	0.183987
O96299	LD47736p GN=Sodh-2	O96299_DROME	0.1639	1	3	25	0.857143	-0.222392	0.37941	0.420891
O96607	CG11324-PA, isoform A GN=homer	O96607_DROME	0.3553	5	12	59	0.895833	-0.158698	0.619596	0.207891
O96827	Probable elongation factor 1-beta GN=Ef1beta	EF1B_DROME	0.6667	1	12	284	1.68085	0.749192	0.14061	0.851984
O97062	Ccp84Ae GN=Ccp84Ae	O97062_DROME	0.5817	1	9	75	3.83333	1.9386	0.0386878	1.41243
O97102	Small ubiquitin-related modifier GN=smt3	O97102_DROME	0.4444	1	5	106	1.52632	0.610053	0.213124	0.671367
O97125	Heat shock protein 68 GN=Hsp68	HSP68_DROME	0.2063	1	6	185	1.37963	0.464281	0.220575	0.656444							0.656444
O97182	Actin related complex p41 subunit GN=Arpc1	O97182_DROME	0.2122	1	7	25	3.83333	1.9386	0.0836865	1.07734
O97418	CG3621, isoform A GN=CG3621-RA	O97418_DROME	0.3786	1	4	52	1.11111	0.152003	0.75454	0.122318						0.122318
O97428	CG4944-PA, isoform A GN=cib	O97428_DROME	0.7519	2	9	247	1.38194	0.4667	0.0387452	1.41178
O97477	Inositol-3-phosphate synthase GN=Inos	INO1_DROME	0.1876	1	10	49	0.923077	-0.115477	0.751687	0.123963
P00522	Tyrosine-protein kinase Abl GN=Abl	ABL_DROME	0.1019	11	12	57	1.39394	0.479168	0.131119	0.882333
P00761	Trypsin OS=Sus scrofa	TRYP_PIG	0.0779	1	2	161	1.04274	0.0603726	0.735344	0.133509
P02255	Histone H1 GN=His1	H1_DROME	0.2266	4	2	162	0.866667	-0.206451	0.3234	0.49026
P02283	Histone H2B GN=His2B	H2B_DROME	0.4146	1	6	115	1.40909	0.494765	0.299714	0.523293
P02299	Histone H3 GN=His3	H3_DROME	0.2353	1	1	45	0.666667	-0.584963	0.0122851	1.91062
P02516	Heat shock protein 23 GN=Hsp23	HSP23_DROME	0.7742	1	13	334	1.7673	0.821543	0.00745524	2.12754
P02517	Heat shock protein 26 GN=Hsp26	HSP26_DROME	0.2163	1	4	36	1.66667	0.736966	0.00542395	2.26568
P02518	Heat shock protein 27 GN=Hsp27	HSP27_DROME	0.6056	1	13	162	3.04167	1.60486	0.0147355	1.83164							1.83164
P02572	Actin-42A GN=Act42A	ACT2_DROME	0.5426	2	2	1002	1.21296	0.278535	0.133064	0.875939
P02574	Actin, larval muscle GN=Act79B	ACT4_DROME	0.4441	1	3	592	1.1284	0.174272	0.484998	0.31426
P02768	Serum albumin OS=Homo sapiens GN=ALB	ALBU_HUMAN	0.1199	1	4	70	1.22222	0.289507	0.552968	0.2573
P02769	Serum albumin OS=Bos taurus GN=ALB	ALBU_BOVIN	0.5651	1	30	446	1.28261	0.359081	0.65961	0.180713
P02828	Heat shock protein 83 GN=Hsp83	HSP83_DROME	0.4393	1	35	928	1.43429	0.520332	0.0619357	1.20806							1.20806
P04052	DNA-directed RNA polymerase II subunit RPB1 GN=RpII215	RPB1_DROME	0.1452	1	23	119	1.1358	0.183712	0.523127	0.281393
P04264	Keratin, type II cytoskeletal 1 OS=Homo sapiens GN=KRT1	K2C1_HUMAN	0.5839	1	34	639	1.24444	0.315502	0.38362	0.416099
P04359	60S ribosomal protein L32 GN=RpL32	RL32_DROME	0.4403	1	6	103	1.22727	0.295456	0.360822	0.442707
P05130-2	Isoform Short of Protein kinase C, brain isozyme GN=Pkc53E - [KPC1_DROME]	KPC1_DROME	0.1597	6	9	50	0.857143	-0.222392	0.453253	0.343659
P05205	Heterochromatin protein 1 GN=Su(var)205	HP1_DROME	0.5825	1	12	231	1.14744	0.198414	0.396694	0.401544
P05303	Elongation factor 1-alpha 2 GN=Ef1alpha100E	EF1A2_DROME	0.2944	1	2	294	1.48148	0.567041	0.31992	0.494958
P05389	60S acidic ribosomal protein P2 GN=RpLP2	RLA2_DROME	0.4248	1	4	74	1.42857	0.514573	0.20458	0.689136
P05661-16	Isoform C of Myosin heavy chain, muscle GN=Mhc - [MYSA_DROME]	MYSA_DROME	0.4618	5	1	643	0.619259	-0.691385	0.000259762	3.58542
P05661-17	Isoform D of Myosin heavy chain, muscle GN=Mhc - [MYSA_DROME]	MYSA_DROME	0.4669	9	0	658	0.628655	-0.66966	0.000229791	3.63867
P05661-19	Isoform F of Myosin heavy chain, muscle GN=Mhc - [MYSA_DROME]	MYSA_DROME	0.4633	8	1	651	0.635417	-0.654225	0.000273113	3.56366
P05661-21	Isoform H of Myosin heavy chain, muscle GN=Mhc - [MYSA_DROME]	MYSA_DROME	0.4684	9	2	673	0.617232	-0.696116	0.000149503	3.82535
P05812	Heat shock protein 67B1 GN=Hsp67Ba	HSP6A_DROME	0.3529	1	7	91	1.11111	0.152003	0.197473	0.704492
P05990	CAD protein GN=r	PYR1_DROME	0.1826	2	38	177	1.26126	0.334867	0.373832	0.427324
P06603	Tubulin alpha-1 chain GN=alphaTub84B	TBA1_DROME	0.5111	3	7	383	1.63077	0.705553	0.0265067	1.57664									1.57664
P06604	Tubulin alpha-2 chain GN=alphaTub85E	TBA2_DROME	0.2829	2	1	288	1.41212	0.497864	0.0214793	1.66798									1.66798
P06754-1	Isoform D of Tropomyosin-1, isoforms 9A/A/B GN=Tm1 - [TPM1_DROME]	TPM1_DROME	0.5719	3	2	168	1	0	1	0
P06754-2	Isoform A of Tropomyosin-1, isoforms 9A/A/B GN=Tm1 - [TPM1_DROME]	TPM1_DROME	0.7659	1	9	346	1.69006	0.757073	0.137966	0.860228
P06754-5	Isoform L of Tropomyosin-1, isoforms 9A/A/B GN=Tm1 - [TPM1_DROME]	TPM1_DROME	0.6761	1	0	290	1.6	0.678072	0.232419	0.633727
P07486	Glyceraldehyde-3-phosphate dehydrogenase 1 GN=Gapdh1	G3P1_DROME	0.4608	2	2	250	1.56061	0.642106	0.112817	0.947626
P07487	Glyceraldehyde-3-phosphate dehydrogenase 2 GN=Gapdh2	G3P2_DROME	0.491	2	3	271	1.54861	0.630975	0.101181	0.9949
P07668-2	Isoform B of Choline O-acetyltransferase GN=Cha - [CLAT_DROME]	CLAT_DROME	0.1849	3	11	52	1.4	0.485427	0.343166	0.464495
P07764	Fructose-bisphosphate aldolase GN=Ald	ALF_DROME	0.615	3	22	629	1.50585	0.590576	0.184699	0.733536
P07909-4	Isoform D of Heterogeneous nuclear ribonucleoprotein A1 GN=Hrb98DE - [ROA1_DROME]	ROA1_DROME	0.4377	4	13	128	1.44444	0.530515	0.00852835	2.06913
P08111-3	Isoform B of Lethal(2) giant larvae protein GN=l(2)gl - [L2GL_DROME]	L2GL_DROME	0.1865	5	18	84	1	0	1	0
P08120	Collagen alpha-1(IV) chain GN=Cg25C	CO4A1_DROME	0.0427	1	6	70	0.833333	-0.263034	0.114364	0.941712
P08181	Casein kinase II subunit alpha GN=CkIIalpha	CSK2A_DROME	0.1875	1	5	16	5	2.32193	0.248066	0.605432
P08266	DNA-directed RNA polymerase II subunit RPB2 GN=RpII140	RPB2_DROME	0.1505	1	17	87	1.04762	0.0671142	0.806961	0.0931476
P08570	60S acidic ribosomal protein P1 GN=RpLP1	RLA1_DROME	0.5	1	3	52	1.83333	0.874469	0.188027	0.72578
P08645	Ras-like protein 3 GN=R	RAS3_DROME	0.2283	1	5	33	1.04167	0.0588937	0.827641	0.0821578
P08646	Ras-like protein 1 GN=Ras85D	RAS1_DROME	0.3757	2	6	49	1.48148	0.567041	0.107718	0.96771
P08736	Elongation factor 1-alpha 1 GN=Ef1alpha48D	EF1A1_DROME	0.4017	1	6	440	1.33333	0.415037	0.255479	0.592644
P08841	Tubulin beta-3 chain GN=betaTub60D	TBB3_DROME	0.3106	1	4	427	2.12069	1.08453	0.000590776	3.22858									3.22858
P08879	Nucleoside diphosphate kinase GN=awd	NDKA_DROME	0.4641	1	6	160	4.11111	2.03953	0.0101136	1.99509									1.99509
P08928	Lamin Dm0 GN=Lam	LAM0_DROME	0.6608	1	43	528	1.2963	0.374396	0.0371916	1.42956
P08970	Protein suppressor of hairy wing GN=su(Hw)	SUHW_DROME	0.0882	1	6	30	1.33333	0.415037	0.481618	0.317297
P08985	Histone H2A.v GN=His2Av	H2AV_DROME	0.3617	1	6	140	1.61111	0.688056	0.326073	0.486686
P09180	60S ribosomal protein L4 GN=RpL4	RL4_DROME	0.4763	1	20	299	1.30055	0.379118	0.245173	0.610527
P09491-2	Isoform Embryonic of Tropomyosin-2 GN=Tm2 - [TPM2_DROME]	TPM2_DROME	0.4155	2	12	122	0.57037	-0.810029	0.000583836	3.23371
P10379	Protein unzipped GN=uzip	UZIP_DROME	0.1537	1	7	33	0.583333	-0.777608	0.000866343	3.06231
P10987	Actin-5C GN=Act5C	ACT1_DROME	0.617	2	1	1013	1.20852	0.273246	0.151647	0.819165
P11046	Laminin subunit beta-1 GN=LanB1	LAMB1_DROME	0.1941	1	30	143	1.25556	0.328326	0.430058	0.366473
P11146	Heat shock 70 kDa protein cognate 2 GN=Hsc70-2	HSP7B_DROME	0.0664	1	1	109	1.39683	0.482152	0.107947	0.966788							0.966788
P11147	Heat shock 70 kDa protein cognate 4 GN=Hsc70-4	HSP7D_DROME	0.5407	1	25	1093	1.50673	0.591425	0.0268287	1.5714							1.5714								1.5714
P11995	Larval serum protein 1 alpha chain GN=Lsp1alpha	LSP1A_DROME	0.1311	1	11	67	1.15556	0.208587	0.772453	0.112128
P11996	Larval serum protein 1 beta chain GN=Lsp1beta	LSP1B_DROME	0.1724	1	13	103	1.57407	0.654503	0.571427	0.243039
P11997	Larval serum protein 1 gamma chain GN=Lsp1gamma	LSP1G_DROME	0.2578	1	18	152	0.844961	-0.243043	0.825233	0.0834237
P12252-9	Isoform U of cAMP-specific 3',5'-cyclic phosphodiesterase GN=dnc - [PDE4B_DROME]	PDE4B_DROME	0.1441	12	8	29	1.27778	0.353637	0.585511	0.232465
P12370	cAMP-dependent protein kinase catalytic subunit GN=Pka-C1	KAPC_DROME	0.2493	3	10	74	1.20833	0.273018	0.248831	0.604096
P12613	T-complex protein 1 subunit alpha GN=T-cp1	TCPA_DROME	0.4309	1	22	174	2.30303	1.20353	0.000212228	3.6732							3.6732				3.6732
P12881	Proteasome subunit alpha type-1 GN=Prosalpha6	PSA1_DROME	0.491	1	13	148	2.56863	1.361	0.0281761	1.55012				1.55012
P12982	Serine/threonine-protein phosphatase alpha-2 isoform GN=Pp1-87B	PP12_DROME	0.245	3	3	63	1.57576	0.656046	0.0542131	1.2659										1.2659
P13055	Ecdysone-induced protein 75B, isoform B GN=Eip75B	E75BB_DROME	0.0871	4	10	36	2.66667	1.41504	0.0101755	1.99244
P13060	Elongation factor 2 GN=EF2	EF2_DROME	0.4254	1	35	772	1.31624	0.396422	0.128852	0.889909
P13395	Spectrin alpha chain GN=alpha-Spec	SPTCA_DROME	0.547	4	122	1445	1.20554	0.269677	0.0274536	1.5614															1.5614
P13469	DNA-binding protein modulo GN=mod	MODU_DROME	0.4041	1	21	196	1.18605	0.246161	0.40798	0.389361
P13496	Dynactin subunit 1 GN=Gl	DCTN1_DROME	0.2332	1	25	124	1.04444	0.0627358	0.693239	0.159117									0.159117
P13607-4	Isoform 4 of Sodium/potassium-transporting ATPase subunit alpha GN=Atpalpha - [ATNA_DROME]	ATNA_DROME	0.4137	9	36	387	0.895238	-0.159657	0.198753	0.701686
P13645	Keratin, type I cytoskeletal 10 OS=Homo sapiens GN=KRT10	K1C10_HUMAN	0.4692	6	21	332	0.938697	-0.0912681	0.723485	0.140571
P13678	Protein kinase C GN=Pkc98E	KPC3_DROME	0.1625	4	9	76	0.933333	-0.0995357	0.680138	0.167403
P13706-4	Isoform GPDH-3 of Glycerol-3-phosphate dehydrogenase [NAD(+)], cytoplasmic GN=Gpdh - [GPDA_DROME]	GPDA_DROME	0.2257	4	6	32	0.851852	-0.231326	0.733102	0.134835
P13709	Homeotic protein female sterile GN=fs(1)h	FSH_DROME	0.0662	5	8	37	1.72222	0.784271	0.271603	0.566066
P14130	40S ribosomal protein S14 GN=RpS14a	RS14_DROME	0.4636	1	7	155	1.23232	0.301381	0.507049	0.29495
P14199	Protein ref(2)P GN=ref(2)P	REF2P_DROME	0.202	1	8	42	0.666667	-0.584963	0.103692	0.984253
P14318	Muscle-specific protein 20 GN=Mp20	MP20_DROME	0.4348	1	9	51	0.611111	-0.710493	0.0459045	1.33815
P15007	Enolase GN=Eno	ENO_DROME	0.552	2	21	465	1.55691	0.638686	0.105421	0.977074
P15215	Laminin subunit gamma-1 GN=LanB2	LAMC1_DROME	0.2453	1	34	147	0.990991	-0.0130562	0.965894	0.0150705
P15348	DNA topoisomerase 2 GN=Top2	TOP2_DROME	0.3082	1	44	279	1.14286	0.192645	0.173659	0.760304
P15357	Ubiquitin-40S ribosomal protein S27a GN=RpS27A	RS27A_DROME	0.4808	5	2	336	1.31373	0.393664	0.0550413	1.25931
P15364	Protein amalgam GN=Ama	AMAL_DROME	0.2943	2	7	60	1.66667	0.736966	0.0432703	1.36381
P16371-2	Isoform A of Protein groucho GN=gro - [GROU_DROME]	GROU_DROME	0.2197	2	13	75	1.45238	0.53842	0.0939627	1.02704
P16378	G protein alpha o subunit GN=Galphao	GNAO_DROME	0.2458	5	8	80	0.878788	-0.186413	0.133975	0.872978
P16620-2	Isoform B of Tyrosine-protein phosphatase 69D GN=Ptp69D - [PTP69_DROME]	PTP69_DROME	0.065	2	9	30	1.09524	0.131245	0.806961	0.0931476
P16914-2	Isoform B of Protein elav GN=elav - [ELAV_DROME]	ELAV_DROME	0.3069	5	10	135	1.54167	0.624491	0.0299831	1.52312
P17133	U1 small nuclear ribonucleoprotein 70 kDa GN=snRNP-U1-70K	RU17_DROME	0.2455	1	12	94	0.82716	-0.273761	0.348196	0.458176
P17210	Kinesin heavy chain GN=Khc	KINH_DROME	0.5087	1	45	246	1.01093	0.0156816	0.938659	0.0274921															0.0274921
P17336	Catalase GN=Cat	CATA_DROME	0.2609	1	11	90	0.866667	-0.206451	0.188027	0.72578														0.72578
P17917	Proliferating cell nuclear antigen GN=PCNA	PCNA_DROME	0.3154	1	8	57	4.41667	2.14296	0.0603625	1.21923
P18053	Proteasome subunit alpha type-4 GN=Prosalpha3	PSA4_DROME	0.2576	2	7	104	1.05333	0.0749621	0.740859	0.130264				0.130264
P18091-5	Isoform A of Alpha-actinin, sarcomeric GN=Actn - [ACTN_DROME]	ACTN_DROME	0.3095	6	28	195	1.07971	0.110644	0.675905	0.170114
P18101	Ubiquitin-60S ribosomal protein L40 GN=RpL40	RL40_DROME	0.4141	5	1	287	1.20968	0.274622	0.0713682	1.1465
P18431	Protein kinase shaggy GN=sgg	SGG_DROME	0.1809	11	9	86	1.17544	0.233199	0.358873	0.445059
P18432	Myosin regulatory light chain 2 GN=Mlc2	MLR_DROME	0.491	2	7	115	0.702703	-0.509014	0.0518859	1.28495																			1.28495
P18489-4	Isoform D of Synaptobrevin GN=Syb - [SYB_DROME]	SYB_DROME	0.5138	4	4	29	0.740741	-0.432959	0.257663	0.588948
P18824-2	Isoform Neural of Armadillo segment polarity protein GN=arm - [ARM_DROME]	ARM_DROME	0.1484	2	9	39	1.29167	0.369234	0.229094	0.639987
P19109-3	Isoform D of ATP-dependent RNA helicase p62 GN=Rm62 - [DDX17_DROME]	DDX17_DROME	0.3983	4	18	203	1.24031	0.310701	0.0452893	1.344
P19351-3	Isoform 3 of Troponin T, skeletal muscle GN=up - [TNNT_DROME]	TNNT_DROME	0.2897	10	1	76	0.511111	-0.968291	0.00663535	2.17814
P19889	60S acidic ribosomal protein P0 GN=RpLP0	RLA0_DROME	0.2303	1	6	67	1.2619	0.335603	0.273573	0.562926
P20028	DNA-directed RNA polymerase I subunit RPA2 GN=RpI135	RPA2_DROME	0.0735	1	8	33	0.766667	-0.383329	0.508781	0.293469
P20193	Protein suppressor of variegation 3-7 GN=Su(var)3-7	SUV37_DROME	0.1032	2	11	44	0.794872	-0.331206	0.133975	0.872978
P20228	Glutamate decarboxylase GN=Gad1	DCE_DROME	0.2784	3	13	170	1.24074	0.311202	0.101733	0.992538
P20232	Transcription elongation factor S-II GN=TfIIS	TFS2_DROME	0.4633	1	12	53	2.61111	1.38466	0.0979462	1.00901
P20240	Otefin GN=Ote	OTE_DROME	0.3726	1	11	57	1.02381	0.0339473	0.90095	0.0452995
P20241-2	Isoform A of Neuroglian GN=Nrg - [NRG_DROME]	NRG_DROME	0.1792	3	19	104	0.822222	-0.2824	0.269903	0.568792
P20354-2	Isoform A of G protein alpha s subunit GN=Galphas - [GNAS_DROME]	GNAS_DROME	0.1649	4	5	39	0.966667	-0.0489096	0.871929	0.059519
P20432	Glutathione S-transferase 1-1 GN=GstD1	GSTT1_DROME	0.2536	3	6	67	2.45833	1.29768	0.000209197	3.67945
P20477	Glutamine synthetase 1, mitochondrial GN=Gs1	GLNA1_DROME	0.2732	1	9	60	1.66667	0.736966	0.0249432	1.60305					1.60305
P20478	Glutamine synthetase 2 cytoplasmic GN=Gs2	GLNA2_DROME	0.3225	3	4	366	1.15447	0.207233	0.55187	0.258163					0.258163
P20478-3	Isoform B of Glutamine synthetase 2 cytoplasmic GN=Gs2 - [GLNA2_DROME]	GLNA2_DROME	0.3171	2	1	346	1.10833	0.148392	0.652074	0.185703
P21187	Polyadenylate-binding protein GN=pAbp	PABP_DROME	0.3991	1	20	263	2.03604	1.02576	0.000184098	3.73495
P21521	Synaptotagmin 1 GN=Syt1	SY65_DROME	0.4008	5	1	126	0.901961	-0.148863	0.5265	0.278602															0.278602
P21914	Succinate dehydrogenase [ubiquinone] iron-sulfur subunit, mitochondrial GN=SdhB	SDHB_DROME	0.2088	2	7	41	1.18519	0.245112	0.455693	0.341327						0.341327
P22058	Chromosomal protein D1 GN=D1	CPD1_DROME	0.5324	1	14	231	0.908602	-0.138279	0.512043	0.290693
P22464-3	Isoform c of Annexin B9 GN=AnxB9 - [ANXB9_DROME]	ANXB9_DROME	0.4568	4	17	171	3.01961	1.59436	0.00180113	2.74446
P22465	Annexin B10 GN=AnxB10	ANX10_DROME	0.5171	1	1	101	3.875	1.9542	0.00530468	2.27534
P22465-2	Isoform A of Annexin B10 GN=AnxB10 - [ANX10_DROME]	ANX10_DROME	0.5156	1	1	102	3.91667	1.96963	0.0115783	1.93636
P22700	Calcium-transporting ATPase sarcoplasmic/endoplasmic reticulum type GN=Ca-P60A	ATC1_DROME	0.1608	2	15	55	0.539683	-0.889817	0.0469808	1.32808
P22769	Proteasome subunit alpha type-7-1 GN=Prosalpha4	PSA71_DROME	0.3173	2	9	94	1.5098	0.594361	0.0253952	1.59525				1.59525
P22817	Insulin-degrading enzyme GN=Ide	IDE_DROME	0.1141	1	12	41	1.03333	0.0473057	0.90095	0.0452995
P22979	Heat shock protein 67B3 GN=Hsp67Bc	HSP6C_DROME	0.2161	1	4	31	0.958333	-0.0614005	0.85462	0.0682269
P23128	Putative ATP-dependent RNA helicase me31b GN=me31B	DDX6_DROME	0.2876	2	13	101	1.77083	0.824428	0.00670223	2.17378
P23226-2	Isoform C2 of 205 kDa microtubule-associated protein GN=Map205 - [MA205_DROME]	MA205_DROME	0.3959	1	1	353	1.1375	0.185867	0.145752	0.836385
P23226-3	Isoform B3 of 205 kDa microtubule-associated protein GN=Map205 - [MA205_DROME]	MA205_DROME	0.4205	3	6	378	1.14902	0.200403	0.178229	0.749022
P23572	Cyclin-dependent kinase 1 GN=cdc2	CDK1_DROME	0.3333	1	9	34	1.08333	0.115477	0.859596	0.0657055
P23654	Neurotactin GN=Nrt	NRT_DROME	0.2671	1	19	175	0.857143	-0.222392	0.0595254	1.2253
P23696	Serine/threonine-protein phosphatase PP2A GN=mts	PP2A_DROME	0.2816	1	7	59	1.63333	0.707819	0.0486796	1.31265										1.31265
P24156	Protein l(2)37Cc GN=l(2)37Cc	L2CC_DROME	0.4565	1	11	97	2.36111	1.23947	0.021366	1.67028
P24785	Dosage compensation regulator GN=mle	MLE_DROME	0.1005	4	11	50	0.948718	-0.0759489	0.776448	0.109888
P25007	Peptidyl-prolyl cis-trans isomerase GN=Cyp1	PPIA_DROME	0.3965	2	7	241	1.62602	0.701342	0.0344823	1.4624							1.4624														1.4624
P25159-2	Isoform B of Maternal effect protein staufen GN=stau - [STAU_DROME]	STAU_DROME	0.1532	3	9	31	1.73333	0.793549	0.097004	1.01321
P25161	Probable 26S proteasome non-ATPase regulatory subunit 3 GN=Rpn3	PSMD3_DROME	0.5567	1	28	228	0.977011	-0.0335526	0.849074	0.0710542				0.0710542
P25171	Regulator of chromosome condensation GN=Rcc1	RCC1_DROME	0.3035	1	12	134	0.907407	-0.140178	0.432498	0.364016
P25228	Ras-related protein Rab-3 GN=Rab3	RAB3_DROME	0.3591	1	6	35	0.962963	-0.0544478	0.897456	0.0469868															0.0469868
P25439-2	Isoform C of ATP-dependent helicase brm GN=brm - [BRM_DROME]	BRM_DROME	0.1836	4	29	200	0.836257	-0.257981	0.309848	0.508852
P25455-2	Isoform 1 of 1-phosphatidylinositol 4,5-bisphosphate phosphodiesterase classes I and II GN=Plc21C - [PIP1_DROME]	PIP1_DROME	0.1563	6	19	60	1.09524	0.131245	0.833843	0.0789155
P25822	Maternal protein pumilio GN=pum	PUM_DROME	0.0789	3	12	65	1.83333	0.874469	0.0089912	2.04618
P25843	Profilin GN=chic	PROF_DROME	0.8889	1	7	55	4.25	2.08746	0.13239	0.878144
P25991-4	Isoform E of Protein suppressor of forked GN=su(f) - [SUF_DROME]	SUF_DROME	0.1583	2	11	57	1.25	0.321928	0.439085	0.357452
P26017	Polycomb group protein Pc GN=Pc	PC_DROME	0.1154	1	4	30	0.777778	-0.36257	0.26657	0.574189
P26019	DNA polymerase alpha catalytic subunit GN=DNApol-alpha180	DPOLA_DROME	0.0739	1	10	26	1.11111	0.152003	0.75454	0.122318
P26308	Guanine nucleotide-binding protein subunit beta-1 GN=Gbeta13F	GBB1_DROME	0.3176	1	11	74	3.19048	1.67377	0.00250262	2.60161
P26686-2	Isoform A of Serine-arginine protein 55 GN=B52 - [SRR55_DROME]	SRR55_DROME	0.3114	9	11	183	1.23077	0.29956	0.282012	0.549732
P26802	Probable ATP-dependent RNA helicase Dbp73D GN=Dbp73D	DDX51_DROME	0.0466	1	2	29	1.6	0.678072	0.459952	0.337287
P27864	Recombination repair protein 1 GN=Rrp1	RRP1_DROME	0.1708	2	10	55	0.745098	-0.424498	0.153476	0.813958
P28668	Bifunctional glutamate/proline--tRNA ligase GN=Aats-glupro	SYEP_DROME	0.2806	2	46	310	1.16425	0.219402	0.26283	0.580325
P29310	14-3-3 protein zeta GN=14-3-3zeta	1433Z_DROME	0.6411	1	1	307	1.8913	0.919382	0.0359055	1.44484							1.44484
P29310-2	Isoform VI' of 14-3-3 protein zeta GN=14-3-3zeta - [1433Z_DROME]	1433Z_DROME	0.6411	1	2	305	1.87681	0.908284	0.0713083	1.14686
P29310-3	Isoform C of 14-3-3 protein zeta GN=14-3-3zeta - [1433Z_DROME]	1433Z_DROME	0.6048	1	1	272	1.8254	0.86821	0.0394834	1.40359
P29327	40S ribosomal protein S6 GN=RpS6	RS6_DROME	0.3266	3	8	169	1.37374	0.458106	0.0808173	1.0925
P29413	Calreticulin GN=Crc	CALR_DROME	0.431	1	18	237	1.1859	0.245979	0.255099	0.593291							0.593291
P29613	Triosephosphate isomerase GN=Tpi	TPIS_DROME	0.5182	2	13	191	1.53922	0.622195	0.00450495	2.34631
P29617-4	Isoform G of Homeobox protein prospero GN=pros - [PROS_DROME]	PROS_DROME	0.1231	3	17	72	1.38095	0.465664	0.443909	0.352706
P29681	20-hydroxyecdysone protein GN=ImpE2	IMPE2_DROME	0.2597	1	9	91	3.45833	1.79008	0.00126609	2.89754
P29742	Clathrin heavy chain GN=Chc	CLH_DROME	0.3194	1	49	380	1.1746	0.232173	0.249171	0.603502												0.603502			0.603502
P29746	Protein bangles and beads GN=bnb	BNB_DROME	0.6199	1	23	576	1.12121	0.165059	0.627613	0.202308
P29843	Heat shock 70 kDa protein cognate 1 GN=Hsc70-1	HSP7A_DROME	0.1856	2	3	158	1.36559	0.449526	0.072991	1.13673							1.13673
P29844	Heat shock 70 kDa protein cognate 3 GN=Hsc70-3	HSP7C_DROME	0.4375	1	23	567	1.29598	0.37404	0.127171	0.895613
P29845	Heat shock 70 kDa protein cognate 5 GN=Hsc70-5	HSP7E_DROME	0.4738	1	31	348	1.15385	0.206451	0.165482	0.78125							0.78125
P31007-6	Isoform H of Disks large 1 tumor suppressor protein GN=dlg1 - [DLG1_DROME]	DLG1_DROME	0.1712	9	1	90	1.16667	0.222392	0.391524	0.407242
P31009	40S ribosomal protein S2 GN=RpS2	RS2_DROME	0.3371	1	9	80	1.71795	0.780687	0.0230656	1.63704
P31409	V-type proton ATPase subunit B GN=Vha55	VATB_DROME	0.298	1	13	177	1.2193	0.286051	0.0129942	1.88625						1.88625
P32100	60S ribosomal protein L7 GN=RpL7	RL7_DROME	0.3333	1	12	109	1.0641	0.0896372	0.633769	0.198069
P32234	GTP-binding protein 128up GN=128up	128UP_DROME	0.4212	1	13	43	3.25	1.70044	0.0368591	1.43345
P32392	Actin-related protein 3 GN=Arp3	ARP3_DROME	0.2057	1	8	43	1.45833	0.544321	0.145752	0.836385
P32865	G protein-coupled receptor kinase 1 GN=Gprk1	GPRK1_DROME	0.1829	1	11	48	1.26667	0.341037	0.610111	0.214591
P33438	Glutactin GN=Glt	GLT_DROME	0.2524	1	25	187	1.11628	0.158698	0.340528	0.467847
P34739	Transcription termination factor 2 GN=lds	TTF2_DROME	0.2196	1	20	67	0.980392	-0.0285692	0.951366	0.0216525
P35122	Ubiquitin carboxyl-terminal hydrolase GN=Uch	UCHL_DROME	0.5066	2	10	136	2.18519	1.12776	0.000253888	3.59536
P35128	Ubiquitin-conjugating enzyme E2 N GN=ben	UBE2N_DROME	0.3775	2	5	36	2.66667	1.41504	0.133975	0.872978
P35220	Catenin alpha GN=alpha-Cat	CTNA_DROME	0.2977	2	23	111	1.08974	0.123989	0.653161	0.18498
P35381	ATP synthase subunit alpha, mitochondrial GN=blw	ATPA_DROME	0.3732	1	23	387	1.81667	0.861294	0.127046	0.896038						0.896038					0.896038
P35415	Paramyosin, long form GN=Prm	MYSP1_DROME	0.3652	2	32	134	0.478788	-1.06254	0.000963167	3.0163																			3.0163
P35421	Phosphoribosylformylglycinamidine synthase GN=ade2	PUR4_DROME	0.1145	1	15	52	1	0	1	0
P35527	Keratin, type I cytoskeletal 9 OS=Homo sapiens GN=KRT9	K1C9_HUMAN	0.5474	1	24	533	1.13499	0.182675	0.712042	0.147494
P35600	Replication factor C subunit 1 GN=Gnf1	RFC1_DROME	0.1369	1	11	49	0.6875	-0.540568	0.105436	0.977011
P35820	Polycomb group protein Psc GN=Psc	PSC_DROME	0.0856	1	10	27	0.791667	-0.337035	0.564648	0.248222
P35875	Poly [ADP-ribose] polymerase GN=Parp	PARP_DROME	0.1036	3	10	25	0.857143	-0.222392	0.739194	0.131242
P35908	Keratin, type II cytoskeletal 2 epidermal OS=Homo sapiens GN=KRT2	K22E_HUMAN	0.5743	1	36	355	1.02682	0.0381832	0.906246	0.0427538
P36179	Serine/threonine-protein phosphatase PP2A 65 kDa regulatory subunit GN=Pp2A-29B	2AAA_DROME	0.2132	3	13	122	1.60317	0.680932	0.000798347	3.09781										3.09781
P36188-3	Isoform 2 of Troponin I GN=wupA - [TNNI_DROME]	TNNI_DROME	0.3462	9	3	59	0.759259	-0.397335	0.142438	0.846373
P36188-5	Isoform 4 of Troponin I GN=wupA - [TNNI_DROME]	TNNI_DROME	0.2548	8	1	26	0.75	-0.415037	0.329662	0.481931
P36241	60S ribosomal protein L19 GN=RpL19	RL19_DROME	0.4187	1	11	182	1.18333	0.242857	0.417013	0.37985
P36872-2	Isoform B of Protein phosphatase PP2A 55 kDa regulatory subunit GN=tws - [2ABA_DROME]	2ABA_DROME	0.2551	2	11	77	1.27083	0.345775	0.0473831	1.32438
P36951	Putative hydroxypyruvate isomerase GN=Gip	HYI_DROME	0.2311	1	5	43	1.1	0.137504	0.643762	0.191275
P36975	Synaptosomal-associated protein 25 GN=Snap25	SNP25_DROME	0.2264	2	4	31	1.38889	0.473931	0.283538	0.547389															0.547389
P38979-2	Isoform A of 40S ribosomal protein SA GN=sta - [RSSA_DROME]	RSSA_DROME	0.263	2	8	101	1.4386	0.524662	0.0200321	1.69827
P39018	40S ribosomal protein S19a GN=RpS19a	RS19A_DROME	0.4936	1	8	110	1.19444	0.25634	0.213687	0.670223
P39205	Molybdenum cofactor synthesis protein cinnamon GN=cin	CIN_DROME	0.1913	1	10	44	1.5	0.584963	0.228258	0.641574
P39736	Puff-specific protein Bx42 GN=Bx42	BX42_DROME	0.3071	1	15	97	0.781609	-0.355481	0.099617	1.00167
P40304	Proteasome subunit beta type-1 GN=Prosbeta6	PSB1_DROME	0.2894	1	5	39	1.83333	0.874469	0.0689883	1.16122				1.16122
P40320-4	Isoform 4 of S-adenosylmethionine synthase GN=Sam-S - [METK_DROME]	METK_DROME	0.2178	13	8	34	1.28571	0.36257	0.37941	0.420891
P40417	Mitogen-activated protein kinase ERK-A GN=rl	ERKA_DROME	0.1197	17	4	41	0.909091	-0.137504	0.772087	0.112334
P40423	Myosin regulatory light chain sqh GN=sqh	SQH_DROME	0.3391	1	5	75	1.45238	0.53842	0.0486796	1.31265																			1.31265
P40796	La protein homolog GN=La	LA_DROME	0.4846	2	19	257	1.11864	0.161751	0.536388	0.270521
P40797	Protein peanut GN=pnut	PNUT_DROME	0.3135	1	15	137	1.42308	0.509014	0.011949	1.92267
P40945	ADP-ribosylation factor 2 GN=Arf102F	ARF2_DROME	0.3833	1	3	39	1.29167	0.369234	0.574823	0.240466															0.240466
P41042	40S ribosomal protein S4 GN=RpS4	RS4_DROME	0.4368	1	10	110	1.33333	0.415037	0.222442	0.652784
P41043	Glutathione S-transferase S1 GN=GstS1	GST1_DROME	0.4699	1	8	97	1.97619	0.982722	0.0483989	1.31516														1.31516
P41044	Calbindin-32 GN=Cbp53E	CAB32_DROME	0.6097	1	16	151	2.46296	1.30039	0.0110508	1.95661
P41073-3	Isoform C of Zinc finger protein on ecdysone puffs GN=Pep - [PEP_DROME]	PEP_DROME	0.3449	3	27	377	1.01792	0.0256258	0.855038	0.0680147
P41092	60S ribosomal protein L27a GN=RpL27A	RL27A_DROME	0.4295	1	7	91	1.26316	0.337035	0.440551	0.356004
P41093	60S ribosomal protein L18a GN=RpL18A	RL18A_DROME	0.4972	1	11	162	1.16667	0.222392	0.582424	0.234761
P41094	40S ribosomal protein S18 GN=RpS18	RS18_DROME	0.5526	1	11	193	1.23577	0.305413	0.46396	0.33352
P41126	60S ribosomal protein L13 GN=RpL13	RL13_DROME	0.4174	1	11	233	1.13208	0.17897	0.257663	0.588948
P41374	Eukaryotic translation initiation factor 2 subunit 1 GN=eIF-2alpha	IF2A_DROME	0.5308	1	15	145	1.6	0.678072	0.325925	0.486883
P41375	Eukaryotic translation initiation factor 2 subunit 2 GN=eIF-2beta	IF2B_DROME	0.2532	1	7	38	0.818182	-0.289507	0.37941	0.420891													0.420891
P42207	Septin-1 GN=Sep1	SEPT1_DROME	0.241	1	6	71	2.03333	1.02385	0.00494616	2.30573
P42212	Green fluorescent protein OS=Aequorea victoria GN=GFP	GFP_AEQVI	0.1513	1	4	31	0.404762	-1.30485	0.123866	0.90705
P42787	Carboxypeptidase D GN=svr	CBPD_DROME	0.0498	8	7	30	1.66667	0.736966	0.0337978	1.47111
P45437	Coatomer subunit beta GN=betaCop	COPB_DROME	0.1878	1	13	91	1.35185	0.434937	0.127265	0.89529												0.89529
P45594	Cofilin/actin-depolymerizing factor homolog GN=tsr	CADF_DROME	0.7838	1	11	249	3.43939	1.78215	0.00941954	2.02597
P45888-2	Isoform A of Actin-related protein 2 GN=Arp2 - [ARP2_DROME]	ARP2_DROME	0.1574	2	6	45	1.33333	0.415037	0.173659	0.760304
P45975	Histone-lysine N-methyltransferase Su(var)3-9 GN=Su(var)3-9	SUV39_DROME	0.085	1	1	27	0.952381	-0.0703893	0.724605	0.139899													0.139899
P46150-2	Isoform D of Moesin/ezrin/radixin homolog 1 GN=Moe - [MOEH_DROME]	MOEH_DROME	0.3635	7	27	215	0.969697	-0.0443941	0.594881	0.22557
P46222	60S ribosomal protein L11 GN=RpL11	RL11_DROME	0.2935	1	6	57	1.39394	0.479168	0.08356	1.078
P46223	60S ribosomal protein L7a GN=RpL7A	RL7A_DROME	0.3321	1	9	196	1.02778	0.0395284	0.75454	0.122318
P46415	Alcohol dehydrogenase class-3 GN=Fdh	ADHX_DROME	0.2533	1	9	114	1.18667	0.246915	0.229094	0.639987
P46461	Vesicle-fusing ATPase 1 GN=comt	NSF1_DROME	0.3463	1	14	169	1.14912	0.200533	0.34511	0.462043															0.462043
P46824	Kinesin light chain GN=Klc	KLC_DROME	0.4173	2	21	170	1.24074	0.311202	0.164224	0.784563
P46863	Bipolar kinesin KRP-130 GN=Klp61F	KL61_DROME	0.1614	2	15	45	1.33333	0.415037	0.415646	0.381276
P48149	40S ribosomal protein S15Aa GN=RpS15Aa	RS15A_DROME	0.3846	1	1	58	1.42424	0.510195	0.0828138	1.0819
P48159	60S ribosomal protein L23 GN=RpL23	RL23_DROME	0.5143	1	6	122	1.29333	0.371094	0.129982	0.886117
P48375	12 kDa FK506-binding protein GN=FK506-bp2	FKB12_DROME	0.5278	1	4	185	1.72222	0.784271	0.298842	0.524558							0.524558														0.524558
P48461	Serine/threonine-protein phosphatase alpha-1 isoform GN=Pp1alpha-96A	PP11_DROME	0.1988	2	2	39	1.83333	0.874469	0.0337978	1.47111										1.47111
P48462	Serine/threonine-protein phosphatase beta isoform GN=flw	PP1B_DROME	0.0879	2	1	30	1.66667	0.736966	0.188027	0.72578										0.72578
P48588	40S ribosomal protein S25 GN=RpS25	RS25_DROME	0.3504	1	5	108	1.46667	0.552541	0.419753	0.377006
P48591	Ribonucleoside-diphosphate reductase large subunit GN=RnrL	RIR1_DROME	0.1367	1	12	57	2.38095	1.25154	0.0055911	2.2525
P48592	Ribonucleoside-diphosphate reductase subunit M2 GN=RnrS	RIR2_DROME	0.2265	1	8	45	1.0303	0.0430687	0.806961	0.0931476
P48598	Eukaryotic translation initiation factor 4E GN=eIF-4E	IF4E_DROME	0.3977	1	1	87	1.04762	0.0671142	0.659743	0.180626													0.180626
P48598-2	Isoform II of Eukaryotic translation initiation factor 4E GN=eIF-4E - [IF4E_DROME]	IF4E_DROME	0.4153	1	1	73	1.09804	0.13493	0.406129	0.391336
P48601	26S protease regulatory subunit 4 GN=Rpt2	PRS4_DROME	0.4146	1	14	161	1.2	0.263034	0.204781	0.68871				0.68871
P48602	V-type proton ATPase catalytic subunit A isoform 1 GN=Vha68-1	VATA1_DROME	0.4153	1	12	224	1.32593	0.407	0.182721	0.738212						0.738212
P48603	F-actin-capping protein subunit beta GN=cpb	CAPZB_DROME	0.3333	1	8	60	1.33333	0.415037	0.355918	0.44865
P48604	GrpE protein homolog, mitochondrial GN=Roe1	GRPE_DROME	0.554	1	11	56	1.53333	0.616671	0.0396598	1.40165							1.40165
P48605	T-complex protein 1 subunit gamma GN=Cctgamma	TCPG_DROME	0.4522	1	24	197	2.29333	1.19745	0.000161592	3.79158							3.79158
P48610	Arginine kinase GN=Argk	KARG_DROME	0.5618	1	1	454	1.63203	0.706672	0.00465051	2.3325
P48610-3	Isoform B of Arginine kinase GN=Argk - [KARG_DROME]	KARG_DROME	0.5324	3	3	455	1.51626	0.600517	0.0126337	1.89847
P48610-4	Isoform C of Arginine kinase GN=Argk - [KARG_DROME]	KARG_DROME	0.5783	2	1	463	1.54878	0.631133	0.013386	1.87335
P48809	Heterogeneous nuclear ribonucleoprotein 27C GN=Hrb27C	RB27C_DROME	0.3729	1	12	184	1.71111	0.774933	0.0550413	1.25931
P48810	Heterogeneous nuclear ribonucleoprotein 87F GN=Hrb87F	RB87F_DROME	0.3792	2	9	121	2.03922	1.02801	0.0339289	1.46943
P49071	MAP kinase-activated protein kinase 2 GN=MAPk-Ak2	MAPK2_DROME	0.1838	3	7	44	1	0	1	0
P49630	60S ribosomal protein L36 GN=RpL36	RL36_DROME	0.2609	1	3	44	1.5	0.584963	0.00542395	2.26568
P49657-2	Isoform D of Serine/threonine-protein kinase minibrain GN=mnb - [MNB_DROME]	MNB_DROME	0.1672	5	9	60	1.20513	0.269187	0.373771	0.427395
P49735	DNA replication licensing factor Mcm2 GN=Mcm2	MCM2_DROME	0.1894	1	14	64	3.22222	1.68806	0.0337978	1.47111
P49963	Signal recognition particle 19 kDa protein GN=Srp19	SRP19_DROME	0.3813	1	4	35	1.125	0.169925	0.546061	0.262758
P50882	60S ribosomal protein L9 GN=RpL9	RL9_DROME	0.3737	1	6	85	2.02778	1.0199	0.000794715	3.09979
P50887	60S ribosomal protein L22 GN=RpL22	RL22_DROME	0.2174	1	5	38	0.818182	-0.289507	0.37941	0.420891
P51123-2	Isoform A of Transcription initiation factor TFIID subunit 1 GN=Taf1 - [TAF1_DROME]	TAF1_DROME	0.109	4	18	37	1.20833	0.273018	0.564648	0.248222
P51140	Segment polarity protein dishevelled GN=dsh	DSH_DROME	0.1589	1	9	23	7.33333	2.87447	0.099617	1.00167
P51592	E3 ubiquitin-protein ligase hyd GN=hyd	HYD_DROME	0.1244	1	30	140	1.125	0.169925	0.558761	0.252774
P52029	Glucose-6-phosphate isomerase GN=Pgi	G6PI_DROME	0.3441	1	16	201	1.38462	0.469485	0.076105	1.11859
P52034	ATP-dependent 6-phosphofructokinase GN=Pfk	PFKA_DROME	0.2234	3	17	184	1.23932	0.309544	0.0618347	1.20877
P52295	Importin subunit alpha GN=Pen	IMA_DROME	0.2318	1	9	60	2.52381	1.3356	0.000447822	3.34889			3.34889
P52304	Serine/threonine-protein kinase polo GN=polo	POLO_DROME	0.2066	1	12	54	0.952381	-0.0703893	0.864094	0.0634389
P53777	Muscle LIM protein 1 GN=Mlp60A	MLP1_DROME	0.5543	2	3	28	0.833333	-0.263034	0.315334	0.50123
P53997	Protein SET GN=Set	SET_DROME	0.3011	1	4	44	1.5	0.584963	0.184281	0.73452
P54351	Vesicle-fusing ATPase 2 GN=Nsf2	NSF2_DROME	0.2766	1	9	106	1.52632	0.610053	0.105436	0.977011															0.977011
P54353	Putative peptidyl-prolyl cis-trans isomerase dodo GN=dod	DOD_DROME	0.4217	1	6	81	1.08772	0.121306	0.494743	0.30562																					0.30562
P54357	Myosin-2 essential light chain GN=Mlc-c	MLC2_DROME	0.381	2	5	47	2.27778	1.18763	0.0453162	1.34375																			1.34375
P54359	Septin-2 GN=Sep2	SEPT2_DROME	0.2434	1	8	70	2.58333	1.36923	0.00768289	2.11448
P54367	Casein kinase I isoform alpha GN=CkIalpha	KC1A_DROME	0.1691	1	5	38	1.07407	0.103093	0.864094	0.0634389
P54385	Glutamate dehydrogenase, mitochondrial GN=Gdh	DHE3_DROME	0.347	4	18	157	0.975	-0.0365259	0.757296	0.120734
P54397	39 kDa FK506-binding nuclear protein GN=FK506-bp1	FKB39_DROME	0.2913	1	11	157	1.41111	0.496832	0.245722	0.609556							0.609556														0.609556
P54399	Protein disulfide-isomerase GN=Pdi	PDI_DROME	0.621	2	27	526	1.43771	0.523773	0.100531	0.997701							0.997701
P54611	V-type proton ATPase subunit E GN=Vha26	VATE_DROME	0.5487	1	14	170	1.62069	0.696608	0.0121412	1.91574						1.91574
P54622	Single-stranded DNA-binding protein, mitochondrial GN=mtSSB	SSBP_DROME	0.3767	1	5	49	0.833333	-0.263034	0.16249	0.789175
P55035	26S proteasome non-ATPase regulatory subunit 4 GN=Rpn10	PSMD4_DROME	0.1641	1	6	44	0.794872	-0.331206	0.279658	0.553372				0.553372
P55162	Membrane-associated protein Hem GN=Hem	HEM_DROME	0.1146	1	13	38	1.25	0.321928	0.453253	0.343659
P55824	Probable ubiquitin carboxyl-terminal hydrolase FAF GN=faf	FAF_DROME	0.1292	2	30	131	0.989899	-0.0146468	0.953563	0.0206506
P55828	40S ribosomal protein S20 GN=RpS20	RS20_DROME	0.1583	1	2	27	1.46667	0.552541	0.124058	0.906376
P55830	40S ribosomal protein S3a GN=RpS3A	RS3A_DROME	0.5896	2	17	293	1.35057	0.433573	0.127074	0.895945
P55841	60S ribosomal protein L14 GN=RpL14	RL14_DROME	0.4458	1	9	153	1.36667	0.450661	0.0464199	1.3333
P55935	40S ribosomal protein S9 GN=RpS9	RS9_DROME	0.4103	2	10	87	0.875	-0.192645	0.194586	0.710888
P56079	Phosphatidate cytidylyltransferase, photoreceptor-specific GN=CdsA	CDSA_DROME	0.0805	1	3	26	1.11111	0.152003	0.419753	0.377006
P56538	Eukaryotic translation initiation factor 6 GN=eIF6	IF6_DROME	0.2571	1	5	34	2.5	1.32193	0.0654412	1.18415													1.18415
P61209	ADP-ribosylation factor 1 GN=Arf79F	ARF1_DROME	0.4725	1	5	76	1.25	0.321928	0.390259	0.408648															0.408648
P61851	Superoxide dismutase [Cu-Zn] GN=Sod	SODC_DROME	0.732	2	10	225	1.45238	0.53842	0.315538	0.500948														0.500948
P61857	Tubulin beta-2 chain GN=betaTub85D	TBB2_DROME	0.3722	1	2	526	2.32323	1.21613	0.000532947	3.27332									3.27332
P62152	Calmodulin GN=Cam	CALM_DROME	0.698	1	10	282	2.07692	1.05445	0.194172	0.711814																			0.711814
P80455	40S ribosomal protein S12 GN=RpS12	RS12_DROME	0.4604	1	5	73	1.87879	0.909802	0.10519	0.978024
P81900	cAMP-dependent protein kinase type II regulatory subunit GN=Pka-R2	KAPR2_DROME	0.4695	5	16	103	1.38333	0.468149	0.209143	0.679558
P82147	Protein lethal(2)essential for life GN=l(2)efl	L2EFL_DROME	0.3102	2	6	31	0.404762	-1.30485	0.0226085	1.64573
P82804	Partner of Y14 and mago GN=wibg	WIBG_DROME	0.5072	1	9	67	1.2619	0.335603	0.36018	0.443481
P84029	Cytochrome c-2 GN=Cyt-c-p	CYC2_DROME	0.4537	2	5	91	1.26316	0.337035	0.37941	0.420891						0.420891
P84040	Histone H4 GN=His4	H4_DROME	0.3981	1	5	55	1.33333	0.415037	0.283741	0.547077
P84051	Histone H2A GN=His2A	H2A_DROME	0.2419	2	2	74	1.72222	0.784271	0.529292	0.276305
P84249	Histone H3.3 GN=His3.3A	H33_DROME	0.2353	1	1	40	0.692308	-0.530515	0.0781407	1.10712
P91621	Protein still life, isoform SIF type 1 GN=sif	SIF1_DROME	0.0777	11	13	52	0.822222	-0.2824	0.473227	0.324931
P91875	DNA-directed RNA polymerase I subunit RPA1 GN=RpI1	RPA1_DROME	0.07	1	10	35	1.125	0.169925	0.776448	0.109888
P91891	Protein Mo25 GN=Mo25	MO25_DROME	0.1799	1	7	50	1.51852	0.602665	0.00861833	2.06458
P91926	AP-2 complex subunit alpha GN=AP-2alpha	AP2A_DROME	0.2319	2	21	133	1.05208	0.073249	0.779437	0.108219															0.108219
P91927	LETM1 and EF-hand domain-containing protein anon-60Da, mitochondrial GN=Letm1	A60DA_DROME	0.0908	1	9	20	0.142857	-2.80735	0.000324975	3.48815
P91928	MICOS complex subunit Mic60 GN=CG6455	MIC60_DROME	0.1908	2	14	51	0.8	-0.321928	0.335761	0.47397
P91929	NADH dehydrogenase [ubiquinone] 1 alpha subcomplex subunit 10, mitochondrial GN=ND42	NDUAA_DROME	0.1966	1	8	32	2.33333	1.22239	0.08708	1.06008						1.06008					1.06008
P91938-2	Isoform A of Thioredoxin reductase 1, mitochondrial GN=Trxr-1 - [TRXR1_DROME]	TRXR1_DROME	0.3299	5	15	92	1.47059	0.556393	0.0709877	1.14882
P92177	14-3-3 protein epsilon GN=14-3-3epsilon	1433E_DROME	0.7023	1	1	515	2.67836	1.42135	0.000954947	3.02002
P92177-1	Isoform D of 14-3-3 protein epsilon GN=14-3-3epsilon - [1433E_DROME]	1433E_DROME	0.7	1	1	502	2.70909	1.43781	0.000781983	3.1068
P92177-2	Isoform B of 14-3-3 protein epsilon GN=14-3-3epsilon - [1433E_DROME]	1433E_DROME	0.7011	1	1	502	2.70909	1.43781	0.00120799	2.91794
P92177-4	Isoform C of 14-3-3 protein epsilon GN=14-3-3epsilon - [1433E_DROME]	1433E_DROME	0.6953	1	1	514	2.78182	1.47603	0.000826299	3.08286
P92208	Stress-activated protein kinase JNK GN=bsk	JNK_DROME	0.1505	3	6	26	0.904762	-0.14439	0.603645	0.219218														0.219218
Q00168	Calcium/calmodulin-dependent protein kinase type II alpha chain GN=CaMKII	KCC2A_DROME	0.3566	7	1	141	1.1828	0.242201	0.459725	0.337502
Q00174	Laminin subunit alpha GN=LanA	LAMA_DROME	0.1708	1	55	265	1.13889	0.187627	0.575878	0.23967
Q00637	Superoxide dismutase [Mn], mitochondrial GN=Sod2	SODM_DROME	0.1843	1	4	32	3.22222	1.68806	0.0632935	1.19864											1.19864			1.19864
Q00963	Spectrin beta chain GN=beta-Spec	SPTCB_DROME	0.4753	3	2	1013	1.06777	0.0946052	0.249791	0.602424															0.602424
Q01295-5	Isoform 5 of Broad-complex core protein isoforms 1/2/3/4/5 GN=br - [BRC1_DROME]	BRC1_DROME	0.1083	8	7	27	0.791667	-0.337035	0.188027	0.72578
Q01604	Phosphoglycerate kinase GN=Pgk	PGK_DROME	0.5446	1	18	207	1.6381	0.712019	0.00286989	2.54213
Q01989	Myosin heavy chain 95F GN=jar	MYS9_DROME	0.2426	3	30	143	0.858333	-0.22039	0.386381	0.412984																			0.412984
Q02308-2	Isoform B of Protein hairless GN=H - [HLES_DROME]	HLES_DROME	0.1228	2	8	32	1.19048	0.251539	0.488053	0.311533
Q02427-2	Isoform B of RNA-binding protein 1 GN=Rbp1 - [RBP1_DROME]	RBP1_DROME	0.4623	3	1	32	1	0	1	0
Q02645-2	Isoform B of Protein hu-li tai shao GN=hts - [HTS_DROME]	HTS_DROME	0.4763	3	10	354	1.17949	0.23816	0.0459045	1.33815
Q02645-3	Isoform C of Protein hu-li tai shao GN=hts - [HTS_DROME]	HTS_DROME	0.402	1	1	241	1.15432	0.207044	0.345068	0.462095
Q02748	Eukaryotic initiation factor 4A GN=eIF-4a	IF4A_DROME	0.3846	1	17	274	1.53061	0.614109	0.00346233	2.46063													2.46063
Q03334	40S ribosomal protein S13 GN=RpS13	RS13_DROME	0.3179	1	6	72	0.929825	-0.10497	0.747977	0.126112
Q03427	Lamin-C GN=LamC	LAMC_DROME	0.4622	1	27	173	0.893617	-0.162271	0.393198	0.405388
Q04047	Protein no-on-transient A GN=nonA	NONA_DROME	0.5729	3	28	334	1.09402	0.129635	0.505457	0.296316
Q04448-2	Isoform A of Bifunctional methylenetetrahydrofolate dehydrogenase/cyclohydrolase, mitochondrial GN=Nmdmc - [MTDC_DROME]	MTDC_DROME	0.2937	2	9	52	1.59259	0.671377	0.0396598	1.40165
Q04499-2	Isoform A of Proline dehydrogenase 1, mitochondrial GN=slgA - [PROD_DROME]	PROD_DROME	0.3124	5	22	146	0.91453	-0.128898	0.340528	0.467847
Q04691-2	Isoform B of Fat-body protein 1 GN=Fbp1 - [FBP1_DROME]	FBP1_DROME	0.1815	3	15	43	2.05556	1.03953	0.476832	0.321635
Q05344	FACT complex subunit Ssrp1 GN=Ssrp	SSRP1_DROME	0.195	1	12	128	1.13793	0.186413	0.445416	0.351235
Q05783	High mobility group protein D GN=HmgD	HMGD_DROME	0.3482	1	2	41	0.642857	-0.63743	0.0509319	1.29301
Q05825	ATP synthase subunit beta, mitochondrial GN=ATPsyn-beta	ATPB_DROME	0.6356	2	20	537	1.40453	0.490088	0.110778	0.955546						0.955546
Q06559	40S ribosomal protein S3 GN=RpS3	RS3_DROME	0.7114	1	18	235	1.33333	0.415037	0.30128	0.52103
Q06830	Peroxiredoxin-1 OS=Homo sapiens GN=PRDX1	PRDX1_HUMAN	0.3166	1	4	64	1.44444	0.530515	0.528849	0.276668
Q06943	High mobility group protein Z GN=HmgZ	HMGZ_DROME	0.2523	1	2	29	0.740741	-0.432959	0.348196	0.458176
Q07152	Inosine-5'-monophosphate dehydrogenase GN=ras	IMDH_DROME	0.2812	2	12	80	1.44444	0.530515	0.161938	0.790651
Q07171-2	Isoform 2 of Gelsolin GN=Gel - [GELS_DROME]	GELS_DROME	0.1108	4	8	30	4.66667	2.22239	0.0384316	1.41531
Q07327	Protein ROP GN=Rop	ROP_DROME	0.3518	1	19	162	1.05128	0.0721498	0.577758	0.238254															0.238254
Q08012	Protein enhancer of sevenless 2B GN=drk	DRK_DROME	0.5261	1	11	59	4.58333	2.1964	0.0330038	1.48144
Q08473-2	Isoform A of RNA-binding protein squid GN=sqd - [SQD_DROME]	SQD_DROME	0.4424	3	9	179	1.32407	0.404984	0.0895307	1.04803
Q09024-3	Isoform B of Neural/ectodermal development factor IMP-L2 GN=ImpL2 - [IMPL2_DROME]	IMPL2_DROME	0.2586	3	5	24	2.33333	1.22239	0.26657	0.574189
Q09332	UDP-glucose:glycoprotein glucosyltransferase GN=Ugt	UGGG_DROME	0.1596	1	21	103	0.850575	-0.23349	0.472217	0.325858
Q0E8E8	MIP08013p1 GN=Mpcp	Q0E8E8_DROME	0.1854	1	6	32	0.851852	-0.231326	0.536963	0.270055
Q0E8J0	MEP-1, isoform A GN=MEP-1	Q0E8J0_DROME	0.2665	1	22	171	1.09167	0.126532	0.54838	0.260919
Q0E8T6	CG34125 GN=CG31652	Q0E8T6_DROME	0.2201	1	3	33	0.766667	-0.383329	0.0828138	1.0819
Q0E8X6	eIF2B-delta, isoform B GN=eIF2B-delta	Q0E8X6_DROME	0.2413	1	1	68	1	0	1	0													0
Q0E924	LD46344p GN=Phb2	Q0E924_DROME	0.2542	3	8	35	0.833333	-0.263034	0.375818	0.425023
Q0E940	Eukaryotic translation initiation factor 3 subunit B GN=eIF3-S9	EIF3B_DROME	0.2087	1	16	169	1.075	0.104337	0.423776	0.372863													0.372863
Q0E965	SRPK, isoform A GN=SRPK	Q0E965_DROME	0.1806	2	10	60	0.916667	-0.125531	0.603645	0.219218
Q0E976	CG10151, isoform A GN=CG10151	Q0E976_DROME	0.1617	2	9	24	7.66667	2.9386	0.000130707	3.8837
Q0E993	Valyl-tRNA synthetase, isoform A GN=Aats-val	Q0E993_DROME	0.285	1	26	145	1.00926	0.0132968	0.93702	0.0282511
Q0E9B2	Dystrobrevin GN=Dyb	Q0E9B2_DROME	0.1482	5	7	35	0.833333	-0.263034	0.619596	0.207891
Q0E9B6	40S ribosomal protein S11 GN=RpS11	RS11_DROME	0.5935	1	6	134	1.15556	0.208587	0.560817	0.251179
Q0E9C6	CG30015, isoform A GN=CG30015-RB	Q0E9C6_DROME	0.0657	3	8	31	0.814815	-0.295456	0.340528	0.467847
Q0E9F9	CG2915, isoform A GN=CG2915-RB	Q0E9F9_DROME	0.2031	1	8	53	1.02564	0.0365259	0.91427	0.0389257
Q0E9G4	CG1600, isoform A GN=Drat	Q0E9G4_DROME	0.1732	2	5	35	1.61111	0.688056	0.203195	0.692088
Q0E9K6	Down syndrome cell adhesion molecule, isoform AL GN=Dscam1	Q0E9K6_DROME	0.0888	59	15	37	0.615385	-0.70044	0.0781407	1.10712
Q0E9Q5	Adherens junction protein p120, isoform B GN=p120ctn	Q0E9Q5_DROME	0.1408	2	8	41	1.18519	0.245112	0.5265	0.278602
Q0KHZ6	CG7834, isoform A GN=CG7834	Q0KHZ6_DROME	0.5652	1	13	147	2.24561	1.16711	0.0213379	1.67085						1.67085					1.67085
Q0KI67	Myosin heavy chain-like, isoform G GN=Mhcl	Q0KI67_DROME	0.062	6	13	37	1.03704	0.0524674	0.921762	0.0353813																			0.0353813
Q0KI68	CG4699, isoform F GN=nsl1	Q0KI68_DROME	0.1182	4	14	66	1.13333	0.180572	0.614927	0.211176
Q0KI98	FI06027p GN=Aats-trp	Q0KI98_DROME	0.1744	1	7	31	1.73333	0.793549	0.337348	0.471922
Q0KIA8	CG1041, isoform B GN=CG1041	Q0KIA8_DROME	0.172	3	10	33	0.888889	-0.169925	0.707259	0.150421
Q0KIB3	CG2051 GN=CG2051	Q0KIB3_DROME	0.2247	1	10	55	1.33333	0.415037	0.262998	0.580048
Q0KIE7	Ankyrin, isoform B GN=Ank	Q0KIE7_DROME	0.2182	1	26	102	1.66667	0.736966	0.0765558	1.11602
Q10714	Angiotensin-converting enzyme GN=Ance	ACE_DROME	0.2065	1	14	100	0.777778	-0.36257	0.170844	0.767399
Q23978	Myosin-IA GN=Myo31DF	MY31D_DROME	0.1256	1	12	49	0.376812	-1.40808	0.00011198	3.95086																			3.95086
Q23979	Myosin-IB GN=Myo61F	MY61F_DROME	0.1981	3	20	44	0.00775194	-7.01123	1.45125e-05	4.83826																			4.83826
Q23983	Soluble NSF attachment protein GN=Snap	SNAP_DROME	0.4829	1	12	95	3.18519	1.67138	0.00263528	2.57917															2.57917
Q23997	Chitinase-like protein CG5210 GN=CG5210	C5210_DROME	0.2146	1	9	48	1.26667	0.341037	0.398041	0.400072
Q24048	Sodium/potassium-transporting ATPase subunit beta-2 GN=nrv2	ATPB2_DROME	0.2786	2	9	67	0.681818	-0.552541	0.0288872	1.5393
Q24090	GH08712p GN=Snr1	Q24090_DROME	0.1919	1	6	27	1.16667	0.222392	0.74567	0.127453
Q24113	FI21126p1 GN=nonA-l	Q24113_DROME	0.2698	1	11	110	1.07692	0.106915	0.603645	0.219218
Q24117	Dynein light chain 1, cytoplasmic GN=ctp	DYL1_DROME	0.4494	2	3	31	10	3.32193	0.242579	0.615146
Q24133	DnaJ protein homolog 1 GN=DnaJ-1	DNAJ1_DROME	0.2365	1	8	42	2	1	0.0654412	1.18415							1.18415
Q24154	60S ribosomal protein L29 GN=RpL29	RL29_DROME	0.5	1	5	94	0.972222	-0.040642	0.930619	0.0312281
Q24179	Protein sly1 homolog GN=Slh	SLY1_DROME	0.1471	1	8	30	1.09524	0.131245	0.806961	0.0931476
Q24185	Protein hook GN=hk	HOOK_DROME	0.1915	1	12	43	0.769231	-0.378512	0.310361	0.508133
Q24186	40S ribosomal protein S5a GN=RpS5a	RS5A_DROME	0.2588	2	8	50	1.51852	0.602665	0.229094	0.639987
Q24208	Eukaryotic translation initiation factor 2 subunit 3 GN=eIF-2gamma	IF2G_DROME	0.2589	2	8	69	1.01961	0.0280144	0.864094	0.0634389
Q24210	Peripheral plasma membrane protein CASK GN=CASK	CSKP_DROME	0.1258	5	10	44	1.13333	0.180572	0.536963	0.270055															0.270055
Q24211	Protein stoned-A GN=stnA	STNA_DROME	0.2306	1	17	81	1.16667	0.222392	0.36928	0.432644															0.432644
Q24246-4	Isoform 1c of Cytoplasmic dynein 1 intermediate chain GN=sw - [DYIN_DROME]	DYIN_DROME	0.115	18	8	51	1.21212	0.277534	0.124058	0.906376
Q24251	ATP synthase subunit d, mitochondrial GN=ATPsyn-d	ATP5H_DROME	0.5449	1	8	89	1.22807	0.296393	0.392684	0.405956						0.405956
Q24253	Adaptor protein complex 1/2, beta subunit GN=AP-1-2beta	Q24253_DROME	0.19	1	19	150	1.13725	0.185556	0.0618347	1.20877												1.20877			1.20877
Q24276	Hsp90 co-chaperone Cdc37 GN=Cdc37	CDC37_DROME	0.4062	1	17	127	1.29487	0.372809	0.452323	0.344552
Q24298	DE-cadherin GN=shg	CADE_DROME	0.1845	1	24	107	1.64815	0.720846	0.125657	0.900812
Q24311	Cullin homolog 1 GN=lin19	CUL1_DROME	0.1589	1	12	34	1.08333	0.115477	0.85462	0.0682269
Q24318	Transcription factor Dp GN=Dp	TFDP_DROME	0.2517	2	10	26	1.11111	0.152003	0.724605	0.139899
Q24319	Dolichyl-diphosphooligosaccharide--protein glycosyltransferase 48 kDa subunit GN=Ost48	OST48_DROME	0.2227	1	10	53	0.705882	-0.5025	0.148704	0.827678
Q24368	Chromatin-remodeling complex ATPase chain Iswi GN=Iswi	ISWI_DROME	0.332	1	31	166	1.08547	0.11832	0.340528	0.467847
Q24372	Lachesin GN=Lac	LACH_DROME	0.2618	2	8	46	1.06061	0.0848889	0.864094	0.0634389
Q24388	Larval serum protein 2 GN=Lsp2	LSP2_DROME	0.1127	1	8	60	1.20513	0.269187	0.712747	0.147065
Q24400	Muscle LIM protein Mlp84B GN=Mlp84B	MLP2_DROME	0.2182	1	9	29	0.203704	-2.29546	0.000354105	3.45087
Q24407	ATP synthase-coupling factor 6, mitochondrial GN=ATPsyn-Cf6	ATP5J_DROME	0.3302	1	4	51	1.55556	0.63743	0.131832	0.879981						0.879981
Q24439	ATP synthase subunit O, mitochondrial GN=Oscp	ATPO_DROME	0.3254	2	9	48	1.95238	0.965235	0.0432703	1.36381						1.36381					1.36381
Q24478	Centrosome-associated zinc finger protein CP190 GN=Cp190	CP190_DROME	0.4288	1	37	280	1.03922	0.0554951	0.744493	0.12814
Q24492	Replication protein A 70 kDa DNA-binding subunit GN=RpA-70	RFA1_DROME	0.2852	1	16	102	1.08333	0.115477	0.614927	0.211176
Q24523-3	Isoform F of Protein bunched, class 2/F/G isoform GN=bun - [BUN2_DROME]	BUN2_DROME	0.1486	8	8	87	1.27778	0.353637	0.0872942	1.05901
Q24524	Protein singed GN=sn	SING_DROME	0.2207	1	10	69	1.30952	0.389042	0.142438	0.846373
Q24537-3	Isoform A of High mobility group protein DSP1 GN=Dsp1 - [HMG2_DROME]	HMG2_DROME	0.1169	4	6	61	1.23077	0.29956	0.310361	0.508133
Q24547	Syntaxin-1A GN=Syx1A	STX1A_DROME	0.1993	1	5	25	0.857143	-0.222392	0.625301	0.203911															0.203911
Q24560	Tubulin beta-1 chain GN=betaTub56D	TBB1_DROME	0.5682	3	6	912	1.88564	0.915058	0.0014668	2.83363									2.83363
Q24572	Probable histone-binding protein Caf1 GN=Caf1	CAF1_DROME	0.3186	1	2	148	1.16162	0.216133	0.360519	0.443072
Q24574-2	Isoform D of Ubiquitin carboxyl-terminal hydrolase 64E GN=Ubp64E - [UBPE_DROME]	UBPE_DROME	0.0806	2	11	32	1.19048	0.251539	0.419753	0.377006
Q26365-2	Isoform A of ADP,ATP carrier protein GN=sesB - [ADT_DROME]	ADT_DROME	0.5819	3	17	137	0.868421	-0.203533	0.277779	0.556301
Q26454	DNA replication licensing factor MCM4 GN=dpa	MCM4_DROME	0.2413	1	20	80	1.57143	0.652077	0.184281	0.73452
Q27237	Protein tumorous imaginal discs, mitochondrial GN=l(2)tid	TID_DROME	0.2288	3	9	33	0.888889	-0.169925	0.751687	0.123963							0.123963
Q27268	ATP-dependent RNA helicase WM6 GN=Hel25E	DX39B_DROME	0.2995	2	12	159	1.70513	0.76988	0.00300299	2.52245
Q27294	RNA-binding protein cabeza GN=caz	CAZ_DROME	0.4386	3	13	129	1.20238	0.265894	0.138943	0.857164
Q27331	V-type proton ATPase catalytic subunit A isoform 2 GN=Vha68-2	VATA2_DROME	0.4788	2	17	274	1.24138	0.311944	0.323917	0.489566						0.489566
Q27415-2	Isoform 2 of Nucleoplasmin-like protein GN=Nlp - [NLP_DROME]	NLP_DROME	0.8182	2	9	274	1.42308	0.509014	0.261797	0.582036
Q27580	Adenosylhomocysteinase GN=Ahcy13	SAHH_DROME	0.2384	2	10	79	1.42222	0.508147	0.0654762	1.18392
Q27889	Serine/threonine-protein phosphatase 2B catalytic subunit 2 GN=Pp2B-14D	PP2B2_DROME	0.2947	2	6	113	1.23611	0.305808	0.338536	0.470395										0.470395
Q29QE1	GH15984p GN=RhoGAP1A	Q29QE1_DROME	0.1597	4	17	65	0.698413	-0.517848	0.0432434	1.36408
Q2M1E6	Cdep, isoform E GN=Cdep	Q2M1E6_DROME	0.0831	2	8	29	1.04762	0.0671142	0.92484	0.0339336
Q2PE14	Zinc finger CCHC domain-containing protein 8 homolog GN=CG4622	ZCHC8_DROME	0.1772	1	8	28	2.77778	1.47393	0.0396598	1.40165
Q32KD2	Histone-lysine N-methyltransferase eggless GN=egg	SETB1_DROME	0.1632	1	15	61	1.02222	0.0317089	0.955487	0.0197751
Q3YMU0	Protein disulfide-isomerase (Fragment) GN=ERp60	Q3YMU0_DROME	0.4151	1	21	394	1.30833	0.38773	0.0868336	1.06131							1.06131
Q45VV3	Transcriptional coactivator yorkie GN=yki	YAP1_DROME	0.1772	2	6	26	2.55556	1.35364	0.0230656	1.63704
Q494K2	CG13350 GN=Ctf4	Q494K2_DROME	0.0994	1	8	37	1.20833	0.273018	0.298842	0.524558
Q4AB30	GUK-holder, isoform C GN=gukh	Q4AB30_DROME	0.1092	4	8	27	1.46667	0.552541	0.197473	0.704492
Q4ABE3	CG33801-PA GN=His1:CG33801	Q4ABE3_DROME	0.2266	1	1	136	0.891892	-0.165059	0.506021	0.295831
Q59DP9	Calcium-transporting ATPase GN=PMCA	Q59DP9_DROME	0.1315	2	1	39	0.595238	-0.748461	0.188491	0.72471
Q59DQ0	Calcium-transporting ATPase GN=PMCA	Q59DQ0_DROME	0.1352	6	1	37	0.615385	-0.70044	0.209657	0.678491
Q59DT1	CG2225, isoform H GN=CG2225	Q59DT1_DROME	0.0909	4	8	29	1.04762	0.0671142	0.897456	0.0469868
Q59DT9	Neurofibromin 1, isoform D GN=Nf1	Q59DT9_DROME	0.0351	3	10	22	0.714286	-0.485427	0.546061	0.262758														0.262758
Q59E11	IA-2 ortholog, isoform D GN=IA-2	Q59E11_DROME	0.2106	3	22	145	0.875	-0.192645	0.216553	0.664436
Q59E30	Failed axon connections, isoform C GN=fax	Q59E30_DROME	0.4867	6	20	311	1.21393	0.279686	0.118922	0.924736
Q59E58	Zipper, isoform C GN=zip	Q59E58_DROME	0.4318	2	2	810	1.20076	0.263945	0.261322	0.582823
Q5BI50	Cullin-4, isoform A GN=Cul4	Q5BI50_DROME	0.1401	1	12	44	0.888889	-0.169925	0.627766	0.202202
Q5KTT4	NAT1, isoform C (Fragment) GN=NAT1	Q5KTT4_DROME	0.3021	2	40	246	1.0565	0.0792889	0.744918	0.127891													0.127891
Q5LK13	Dead box protein 80, isoform B GN=Dbp80	Q5LK13_DROME	0.1924	6	8	34	1.08333	0.115477	0.871929	0.059519
Q5U0V7	GH06496p GN=Synj	Q5U0V7_DROME	0.1667	1	19	82	1.27451	0.349942	0.257663	0.588948															0.588948
Q5U0W8	LD01444p GN=ph-p	Q5U0W8_DROME	0.0579	2	1	29	1.04762	0.0671142	0.909615	0.0411425
Q5U0Y0	LD13852p GN=Sin3A	Q5U0Y0_DROME	0.1547	2	1	130	1.16092	0.215268	0.551723	0.258279
Q5U117	Enigma GN=Egm	Q5U117_DROME	0.2676	1	15	57	1.12821	0.174029	0.682347	0.165995														0.165995
Q5U156	RE01954p GN=row	Q5U156_DROME	0.2514	2	28	147	0.990991	-0.0130562	0.96316	0.0163017
Q6AWJ9	Tyrosine-protein kinase-like otk GN=otk	PTK7_DROME	0.0987	1	9	22	0.481481	-1.05445	0.124058	0.906376
Q6AWN0	1,2-dihydroxy-3-keto-5-methylthiopentene dioxygenase GN=CG32068	MTND_DROME	0.3656	1	7	26	4	2	0.0529078	1.27648					1.27648
Q6IL18	CG43085, isoform A GN=CG43085	Q6IL18_DROME	0.4118	1	10	48	1.95238	0.965235	0.0337978	1.47111
Q6NL44	CG33722, isoform B GN=CG31188	Q6NL44_DROME	0.1987	1	8	30	1.66667	0.736966	0.0735612	1.13335
Q6NN28	RE21974p GN=Tm1	Q6NN28_DROME	0.6491	1	0	270	1.54167	0.624491	0.298797	0.524623
Q6NP69	GST-containing FLYWCH zinc-finger protein GN=gfzf	Q6NP69_DROME	0.1129	2	11	35	1.33333	0.415037	0.500362	0.300716
Q6U9V3	Loner ISO3 GN=siz	Q6U9V3_DROME	0.1264	4	12	36	1.66667	0.736966	0.0781407	1.10712
Q76NQ0	Dolichyl-diphosphooligosaccharide--protein glycosyltransferase subunit 1 GN=CG33303	Q76NQ0_DROME	0.1201	1	5	28	2	1	0.0498253	1.30255
Q7JMZ7	Smooth protein GN=sm	Q7JMZ7_DROME	0.2	5	8	41	1.375	0.459432	0.36928	0.432644
Q7JN06	Boundary element associated factor GN=BEAF-32	Q7JN06_DROME	0.2438	1	1	38	2.2	1.1375	0.0407674	1.38969
Q7JNE1	Non-histone chromosomal protein Prod GN=prod	Q7JNE1_DROME	0.3353	1	11	56	1.10256	0.140863	0.574154	0.240972
Q7JPS2	Igloo, isoform A GN=igl	Q7JPS2_DROME	0.5333	2	8	100	1.05556	0.0780025	0.488053	0.311533
Q7JQN4	LD15481p GN=Rs1	Q7JQN4_DROME	0.1381	1	10	40	1.14815	0.199309	0.760615	0.118835
Q7JQX9	FI14001p1 GN=SNF4Agamma	Q7JQX9_DROME	0.1299	4	1	32	1	0	1	0
Q7JR58	CG6543, isoform A GN=CG6543	Q7JR58_DROME	0.5017	1	12	168	1.82051	0.864345	0.00852835	2.06913											2.06913
Q7JRC0	CG12384 GN=CG12384	Q7JRC0_DROME	0.5208	1	3	88	1.92308	0.943416	0.41251	0.384566
Q7JS69	FI04632p GN=nrv3	Q7JS69_DROME	0.1158	2	4	44	0.644444	-0.633872	0.00465921	2.33169
Q7JUP3	Caspar, isoform A GN=casp	Q7JUP3_DROME	0.2331	1	14	86	0.969697	-0.0443941	0.893565	0.0488739
Q7JV69	SD11922p GN=Spn55B	Q7JV69_DROME	0.1791	1	7	39	0.595238	-0.748461	0.0694309	1.15845
Q7JVH6	CG9436 GN=CG9436	Q7JVH6_DROME	0.2186	1	6	26	1.83333	0.874469	0.298842	0.524558
Q7JVI3	Eukaryotic translation initiation factor 3 subunit M GN=Tango7	EIF3M_DROME	0.4367	1	15	89	2.13889	1.09686	0.030341	1.51797
Q7JVK6	GM27569p GN=trsn	Q7JVK6_DROME	0.2468	1	6	30	2.16667	1.11548	0.283538	0.547389
Q7JVK8	CG5323 GN=CG5323	Q7JVK8_DROME	0.4932	1	7	59	1.63333	0.707819	0.137956	0.860259
Q7JVY0	Coronin GN=coro	Q7JVY0_DROME	0.2746	1	14	70	1.22222	0.289507	0.564648	0.248222
Q7JWF1	CG12140 GN=Etf-QO	Q7JWF1_DROME	0.144	1	8	46	1.2	0.263034	0.577758	0.238254						0.238254
Q7JWQ7	CG3074, isoform A GN=Swim	Q7JWQ7_DROME	0.2645	1	9	25	1.33333	0.415037	0.698515	0.155824
Q7JWR9	Zinc finger CCCH domain-containing protein 15 homolog GN=CG8635	ZC3HF_DROME	0.3267	1	12	86	1.17544	0.233199	0.298842	0.524558
Q7JWU9	AT07420p GN=CG14480	Q7JWU9_DROME	0.502	1	11	70	1.03922	0.0554951	0.859596	0.0657055
Q7JXC4	CG6459 GN=P32	Q7JXC4_DROME	0.2129	1	5	41	1.94444	0.959358	0.0836865	1.07734											1.07734
Q7JXF5	GH12838p GN=Nup62	Q7JXF5_DROME	0.3706	1	12	90	1.54167	0.624491	0.0416104	1.3808			1.3808
Q7JXF7	CG12918 GN=sel	Q7JXF7_DROME	0.2328	1	4	20	6.33333	2.66297	0.118713	0.925501
Q7JXU4	Nuclear GTP binding protein GN=Ns2	Q7JXU4_DROME	0.1365	1	9	47	0.871795	-0.197939	0.626884	0.202813
Q7JXZ2	Eip55E GN=Eip55E	Q7JXZ2_DROME	0.2494	1	9	33	10.6667	3.41504	0.00205279	2.68765
Q7JZD5	Dorsal interacting protein 3 GN=Dip3	Q7JZD5_DROME	0.1379	1	5	27	0.952381	-0.0703893	0.724605	0.139899
Q7JZF5	RE34924p GN=Rpb5	Q7JZF5_DROME	0.2333	1	5	26	4	2	0.0407674	1.38969
Q7JZM8	39S ribosomal protein L41, mitochondrial GN=mRpL41	RM41_DROME	0.3373	1	4	37	0.694444	-0.526069	0.387355	0.411891
Q7JZW2	RE08270p GN=RpS15	Q7JZW2_DROME	0.277	2	4	79	1.05263	0.0740006	0.902037	0.0447756
Q7K012	Brahma associated protein 55kD GN=Bap55	Q7K012_DROME	0.2	1	7	58	1.27778	0.353637	0.391524	0.407242
Q7K084	Obp44a GN=Obp44a	Q7K084_DROME	0.5804	1	12	605	1.90741	0.931613	0.0180237	1.74416
Q7K0D8	CG2158 GN=Nup50	Q7K0D8_DROME	0.2624	1	14	93	1.21667	0.282934	0.204289	0.689755			0.689755
Q7K0E6	Aspartyl-tRNA synthetase GN=Aats-asp	Q7K0E6_DROME	0.3823	1	15	83	1.12281	0.16711	0.607904	0.216165
Q7K0K1	CG2063 GN=CG2063	Q7K0K1_DROME	0.2615	1	7	39	1.11111	0.152003	0.772087	0.112334
Q7K0L4	WD repeat-containing protein 26 homolog GN=CG7611	WDR26_DROME	0.2381	1	13	46	1.06061	0.0848889	0.842842	0.0742541
Q7K0L8	CG4616, isoform A GN=FLASH	Q7K0L8_DROME	0.122	1	9	41	1.18519	0.245112	0.114364	0.941712
Q7K0S5	GDI interacting protein 3, isoform B GN=Gint3	Q7K0S5_DROME	0.229	1	9	46	0.846154	-0.241008	0.506021	0.295831
Q7K0X3	CG2469, isoform A GN=CG2469	Q7K0X3_DROME	0.0861	1	9	38	1.47619	0.561879	0.114364	0.941712
Q7K0Y1-2	Isoform B of Ribosome biogenesis protein BOP1 homolog GN=CG5033 - [BOP1_DROME]	BOP1_DROME	0.1653	2	9	38	1.47619	0.561879	0.320591	0.494048
Q7K110	CG6370 GN=OstDelta	Q7K110_DROME	0.1909	1	11	44	0.583333	-0.777608	0.124258	0.905676
Q7K126	LD13864p GN=Not3	Q7K126_DROME	0.1161	1	9	49	1.70833	0.77259	0.0416301	1.38059
Q7K127	CG7997, isoform A GN=CG7997	Q7K127_DROME	0.1463	1	6	29	1.27778	0.353637	0.375818	0.425023
Q7K130	CG12042 GN=CG12042	Q7K130_DROME	0.1518	1	7	26	1.4	0.485427	0.419753	0.377006
Q7K140	CG4844, isoform A GN=CG18431	Q7K140_DROME	0.2473	1	6	79	1.12963	0.17585	0.551723	0.258279
Q7K148	Proteasome subunit beta type GN=Prosbeta5	Q7K148_DROME	0.1986	1	6	31	2.25	1.16993	0.0186468	1.7294				1.7294
Q7K159	LD06557p GN=mip40	Q7K159_DROME	0.2996	1	8	46	1.2	0.263034	0.652027	0.185735
Q7K180	LD02709p GN=Map60	Q7K180_DROME	0.25	1	12	91	1.04545	0.0641303	0.798217	0.0978789
Q7K1M4	CG1902, isoform A GN=CG1902	Q7K1M4_DROME	0.1571	1	4	28	1	0	1	0
Q7K1V1	CG8441 GN=CG8441	Q7K1V1_DROME	0.3083	1	5	34	1.55556	0.63743	0.0735612	1.13335
Q7K1Y4	Probable cytosolic iron-sulfur protein assembly protein Ciao1 GN=Ciao1	CIAO1_DROME	0.2657	1	7	35	1.125	0.169925	0.603645	0.219218
Q7K204	Barricade, isoform A GN=barc	Q7K204_DROME	0.196	1	10	40	1.33333	0.415037	0.346422	0.460394
Q7K221	Glutamate oxaloacetate transaminase 1, isoform A GN=Got1	Q7K221_DROME	0.2668	2	10	60	0.916667	-0.125531	0.419753	0.377006					0.377006
Q7K2D2	Probable dynactin subunit 2 GN=Dmn	DCTN2_DROME	0.3789	1	14	100	1.42105	0.50696	0.0430007	1.36652
Q7K2E1	CG8839, isoform A GN=CG8839	Q7K2E1_DROME	0.1871	1	8	33	1.04167	0.0588937	0.85462	0.0682269
Q7K2G1	Proteasomal ubiquitin receptor ADRM1 homolog GN=Rpn13	ADRM1_DROME	0.3599	1	1	116	1.70175	0.767023	0.00607595	2.21639				2.21639
Q7K2G1-2	Isoform 2 of Proteasomal ubiquitin receptor ADRM1 homolog GN=Rpn13 - [ADRM1_DROME]	ADRM1_DROME	0.3302	1	1	117	1.7193	0.78182	0.00463166	2.33426
Q7K2N3	CG4288, isoform A GN=CG4288	Q7K2N3_DROME	0.0637	1	4	27	0.791667	-0.337035	0.188027	0.72578
Q7K2P3	CG1648, isoform A GN=CG1648	Q7K2P3_DROME	0.8174	2	17	192	1.26667	0.341037	0.0359709	1.44405
Q7K2X8	Nup44A, isoform A GN=Nup44A	Q7K2X8_DROME	0.3446	1	10	25	2.44444	1.28951	0.0359924	1.44379			1.44379
Q7K3D4	CG5482 GN=CG5482	Q7K3D4_DROME	0.267	1	8	51	0.8	-0.321928	0.335761	0.47397							0.47397														0.47397
Q7K3D8	DMAP1 GN=DMAP1	Q7K3D8_DROME	0.2286	1	8	36	0.866667	-0.206451	0.627766	0.202202
Q7K3J0	CG8258 GN=CG8258	Q7K3J0_DROME	0.5678	1	29	289	2.5	1.32193	0.00281525	2.55048							2.55048
Q7K3L1	Guanylate kinase-associated protein mars GN=mars	MARS_DROME	0.1064	1	8	28	0.833333	-0.263034	0.488053	0.311533
Q7K3M5	CG11107 GN=CG11107	Q7K3M5_DROME	0.1481	1	10	49	1.02778	0.0395284	0.906984	0.0424005
Q7K3W2	CG8728 GN=CG8728-RA	Q7K3W2_DROME	0.1295	1	6	25	1.05556	0.0780025	0.90095	0.0452995
Q7K3Z3	GH01724p GN=p47	Q7K3Z3_DROME	0.5577	1	16	163	1.17593	0.233797	0.196827	0.705914
Q7K485	CathD GN=cathD	Q7K485_DROME	0.2755	1	7	72	1.26667	0.341037	0.159931	0.796069
Q7K486	Armadillo repeat-containing protein 6 homolog GN=CG5721	ARMC6_DROME	0.2953	1	12	56	2.77778	1.47393	0.0222145	1.65336
Q7K4B2	CG7845 GN=CG7845	Q7K4B2_DROME	0.179	1	7	36	0.866667	-0.206451	0.747977	0.126112
Q7K4C2	CG7737 GN=CG7737	Q7K4C2_DROME	0.1139	1	5	29	1.6	0.678072	0.0781407	1.10712
Q7K4C7	CTP:phosphocholine cytidylyltransferase 1, isoform A GN=Cct1	Q7K4C7_DROME	0.1483	2	6	25	0.857143	-0.222392	0.0781407	1.10712
Q7K4G8	CG12391 GN=CG12391	Q7K4G8_DROME	0.1704	1	12	93	0.958333	-0.0614005	0.791682	0.101449
Q7K4H4	Bifunctional lysine-specific demethylase and histidyl-hydroxylase NO66 GN=CG2982	NO66_DROME	0.1087	1	6	32	0.851852	-0.231326	0.419753	0.377006
Q7K4I5	AT08017p GN=CG8892-RB	Q7K4I5_DROME	0.375	1	14	74	1.5641	0.645335	0.0800335	1.09673
Q7K4L8	CG7878 GN=CG7878	Q7K4L8_DROME	0.1323	1	8	57	1.39394	0.479168	0.213593	0.670413
Q7K4N3	Nuclear cap-binding protein subunit 1 GN=Cbp80	NCBP1_DROME	0.1325	1	11	54	1.46667	0.552541	0.283538	0.547389
Q7K4Q5	Probable protein phosphatase CG10417 GN=CG10417	Y0417_DROME	0.4607	1	21	161	1.34375	0.426265	0.135298	0.868708										0.868708
Q7K550	Eukaryotic translation initiation factor 3 subunit J GN=Adam	EIF3J_DROME	0.5466	1	11	92	1.12698	0.172467	0.501705	0.299551													0.299551
Q7K568	CG1623, isoform B GN=hebe	Q7K568_DROME	0.2851	1	10	72	0.494253	-1.01668	0.000613367	3.21228
Q7K581	CG8963, isoform A GN=CG8963	Q7K581_DROME	0.2093	1	10	76	0.933333	-0.0995357	0.715241	0.145548
Q7K5K3	CG11876, isoform A GN=CG11876	Q7K5K3_DROME	0.2384	1	7	74	1.20833	0.273018	0.391524	0.407242
Q7K5M2	CG10139 GN=CG10139	Q7K5M2_DROME	0.2455	1	5	34	0.925926	-0.111031	0.603645	0.219218
Q7K5M6	GH04176p GN=Sip1	Q7K5M6_DROME	0.3176	1	8	39	1.29167	0.369234	0.283538	0.547389
Q7K738	EG:52C10.4 protein GN=Ubc10	Q7K738_DROME	0.3766	1	6	37	1.20833	0.273018	0.298842	0.524558
Q7K7G0	Coat protein (Coatomer) delta, isoform B GN=deltaCOP	Q7K7G0_DROME	0.1789	2	8	30	1.33333	0.415037	0.37941	0.420891												0.420891
Q7KJA9	O-glycosyltransferase GN=sxc	Q7KJA9_DROME	0.1454	1	13	52	1	0	1	0
Q7KK51	BcDNA.GH04637 GN=BcDNA.GH04637	Q7KK51_DROME	0.1534	3	9	29	1.27778	0.353637	0.476294	0.322125
Q7KK96	Structural maintenance of chromosomes protein GN=SMC2	Q7KK96_DROME	0.1756	1	20	88	1.21053	0.275634	0.467994	0.329759
Q7KKI0	GM12270p GN=Cct5	Q7KKI0_DROME	0.4225	2	22	296	1.42857	0.514573	0.106558	0.972413							0.972413
Q7KLE5	Amphiphysin GN=Amph	Q7KLE5_DROME	0.1478	1	7	30	1.33333	0.415037	0.329662	0.481931															0.481931
Q7KLV9	26S proteasome non-ATPase regulatory subunit 11 GN=Rpn6	PSD11_DROME	0.4384	2	20	146	1.98413	0.988504	0.00802704	2.09544				2.09544
Q7KLW9	BcDNA.LD02793 GN=Prp19	Q7KLW9_DROME	0.3307	1	13	166	1.24762	0.319177	0.256212	0.5914
Q7KM15	Beta NAC homolog GN=bic	Q7KM15_DROME	0.7396	1	9	175	1.24324	0.314109	0.552467	0.257693
Q7KMH9	BcDNA.LD26050 GN=wde	Q7KMH9_DROME	0.3085	1	37	206	1.06803	0.0949484	0.432498	0.364016
Q7KMJ6	BcDNA.GH11110 GN=nito	Q7KMJ6_DROME	0.2648	1	20	162	1.20952	0.274439	0.097004	1.01321
Q7KMM4	BcDNA.GH04962 GN=BcDNA.GH04962	Q7KMM4_DROME	0.2186	1	20	156	1.19608	0.258312	0.114364	0.941712
Q7KMP8	26S proteasome regulatory complex subunit p39A GN=Rpn9	Q7KMP8_DROME	0.2435	1	9	88	1.21053	0.275634	0.300102	0.522731				0.522731
Q7KMQ0	26S proteasome regulatory complex subunit p48B GN=Rpt1	Q7KMQ0_DROME	0.545	2	21	196	1.11852	0.161589	0.289061	0.53901				0.53901
Q7KN62	Transitional endoplasmic reticulum ATPase TER94 GN=TER94	TERA_DROME	0.5418	4	42	611	1.40741	0.49304	0.0436461	1.36005				1.36005
Q7KN75	Dodeca-satellite-binding protein 1, isoform A GN=Dp1	Q7KN75_DROME	0.3382	1	41	352	1.27397	0.349334	0.11768	0.929296
Q7KN85	ATP citrate lyase, isoform D GN=ATPCL	Q7KN85_DROME	0.2122	1	1	190	1.64583	0.718818	0.0422522	1.37415
Q7KN90	Cysteine--tRNA ligase, cytoplasmic GN=Aats-cys	SYCC_DROME	0.1889	1	13	53	1.27273	0.347923	0.214271	0.669036
Q7KN94	Walrus, isoform A GN=wal	Q7KN94_DROME	0.3333	1	11	81	1.08772	0.121306	0.640287	0.193625						0.193625
Q7KN97	Pyruvate carboxylase GN=CG1516	Q7KN97_DROME	0.3201	2	35	249	1.05	0.0703893	0.661389	0.179543
Q7KND8	FI09619p GN=Mad1	Q7KND8_DROME	0.2562	1	19	65	1.02083	0.0297473	0.912034	0.0399888
Q7KNF2	Polyadenylate-binding protein 2 GN=Pabp2	PABP2_DROME	0.3036	1	6	103	1.38333	0.468149	0.242845	0.61467
Q7KNM2	CG3018-PA, isoform A GN=lwr	Q7KNM2_DROME	0.3145	1	4	32	1.8	0.847997	0.0781407	1.10712
Q7KNS3	Lissencephaly-1 homolog GN=Lis-1	LIS1_DROME	0.2068	2	8	40	1.33333	0.415037	0.279658	0.553372									0.553372
Q7KNS5	Quaking related 54B, isoform A GN=qkr54B	Q7KNS5_DROME	0.264	2	10	72	1.16667	0.222392	0.315334	0.50123
Q7KQM6-2	Isoform D of PERQ amino acid-rich with GYF domain-containing protein CG11148 GN=CG11148 - [PERQ1_DROME]	PERQ1_DROME	0.1787	2	25	126	0.979167	-0.0303736	0.859596	0.0657055
Q7KQM8	CG11076, isoform D GN=CG11076	Q7KQM8_DROME	0.2385	2	6	34	0.611111	-0.710493	0.0828138	1.0819
Q7KQP6	CG32019-PC, isoform C GN=bt	Q7KQP6_DROME	0.0798	5	53	85	0.0121951	-6.35755	1.78083e-08	7.74938
Q7KQZ4	Longitudinals lacking protein, isoforms A/B/D/L GN=lola	LOLA3_DROME	0.1283	16	1	84	0.884058	-0.177787	0.238333	0.622817
Q7KQZ4-3	Isoform D of Longitudinals lacking protein, isoforms A/B/D/L GN=lola - [LOLA3_DROME]	LOLA3_DROME	0.1497	16	2	83	0.924242	-0.113657	0.585511	0.232465
Q7KR04	40S ribosomal protein S15Ab GN=RpS15Ab	RS15B_DROME	0.3846	1	1	45	1.33333	0.415037	0.335761	0.47397
Q7KRU8	Ferritin GN=Fer1HCH	Q7KRU8_DROME	0.3415	2	5	30	3	1.58496	0.0407674	1.38969
Q7KRW8-2	Isoform D of Pre-mRNA-processing factor 39 GN=CG1646 - [PRP39_DROME]	PRP39_DROME	0.1823	4	19	85	1.01587	0.0227201	0.932268	0.0304591
Q7KS34	Diacylglycerol kinase GN=CG31140-RB	Q7KS34_DROME	0.115	5	12	46	0.944444	-0.0824622	0.776448	0.109888
Q7KSE8	Osa, isoform C GN=osa	Q7KSE8_DROME	0.1037	2	26	89	1.22807	0.296393	0.353706	0.451357
Q7KSM5	Aos1 GN=Aos1	Q7KSM5_DROME	0.3205	1	10	51	5.33333	2.41504	0.00909451	2.04122
Q7KSS0	CG11870, isoform D GN=CG11870-RD	Q7KSS0_DROME	0.128	2	12	34	0.925926	-0.111031	0.835767	0.077915
Q7KT11	CG9331, isoform B GN=CG9331	Q7KT11_DROME	0.2822	4	7	41	1.375	0.459432	0.296586	0.527849
Q7KTA1	CG31839-PA GN=NimB2	Q7KTA1_DROME	0.2779	1	10	43	1.1	0.137504	0.841348	0.0750241
Q7KTL5	LD08056p GN=sip2	Q7KTL5_DROME	0.2359	3	13	70	1.46154	0.547488	0.303569	0.517742
Q7KTW5	CG9391, isoform C GN=CG9391	Q7KTW5_DROME	0.464	1	12	104	1.70588	0.770518	0.0240082	1.61964
Q7KU82	MIP20544p GN=smid	Q7KU82_DROME	0.2879	4	21	151	1.4023	0.487794	0.107816	0.967318
Q7KU92	Ankyrin 2, isoform L GN=Ank2	Q7KU92_DROME	0.3419	11	2	917	1.03125	0.0443941	0.596737	0.224217
Q7KUA4	LD22577p GN=Uba2	Q7KUA4_DROME	0.2443	1	16	111	1.61404	0.690672	0.0137489	1.86173
Q7KUB0	Isocitrate dehydrogenase [NADP] GN=Idh	Q7KUB0_DROME	0.476	5	19	165	1.44086	0.52693	0.00463166	2.33426
Q7KUB3	Ecdysone-inducible gene E1, isoform A GN=ImpE1	Q7KUB3_DROME	0.1578	2	18	112	1.36364	0.447459	0.207031	0.683964
Q7KUT2-2	Isoform A of Lon protease homolog, mitochondrial GN=Lon - [LONM_DROME]	LONM_DROME	0.0855	2	7	25	1.75	0.807355	0.26657	0.574189
Q7KUX3	FI17309p1 GN=Sep4	Q7KUX3_DROME	0.112	2	4	26	1.83333	0.874469	0.0735612	1.13335
Q7KUX7	CG4429-PC, isoform C GN=Rbp2	Q7KUX7_DROME	0.4888	5	16	202	1.23256	0.301656	0.396508	0.401748
Q7KV27	CG1640, isoform A GN=CG1640	Q7KV27_DROME	0.2306	2	13	78	0.706667	-0.500898	0.0170879	1.76731
Q7KVD1	Trio, isoform A GN=trio	Q7KVD1_DROME	0.0685	4	13	31	0.958333	-0.0614005	0.94637	0.023939
Q7KVL7	Vacuolar protein sorting-associated protein 35 GN=Vps35	Q7KVL7_DROME	0.1669	2	12	60	1	0	1	0
Q7KVP4	CG9485, isoform A GN=CG9485	Q7KVP4_DROME	0.1706	4	26	115	1.33333	0.415037	0.161307	0.792346
Q7KVQ0	Probable H/ACA ribonucleoprotein complex subunit 1 GN=CG4038	GAR1_DROME	0.1772	1	5	46	1.06061	0.0848889	0.806961	0.0931476
Q7KVX5	VAMP-associated protein of 33kDa ortholog A, isoform A GN=Vap-33A	Q7KVX5_DROME	0.1447	2	3	45	0.820513	-0.285402	0.438935	0.3576
Q7KW02	Enhanced adult sensory threshold, isoform B GN=east	Q7KW02_DROME	0.1869	3	30	126	1.11494	0.156969	0.466287	0.331346
Q7KW39-2	Isoform A of Probable methylmalonate-semialdehyde dehydrogenase [acylating], mitochondrial GN=CG17896 - [MMSA_DROME]	MMSA_DROME	0.3014	2	13	110	1.59649	0.674905	0.0257969	1.58843
Q7KY08	Protein argonaute GN=AGO1	Q7KY08_DROME	0.1453	2	13	43	1.1	0.137504	0.791682	0.101449													0.101449
Q7PLI7	Serine/threonine-protein kinase CG17528 GN=CG17528	DCLK_DROME	0.1016	2	8	43	1.25926	0.332575	0.257663	0.588948
Q7PLL3	Eukaryotic initiation factor 4B GN=eIF-4B	Q7PLL3_DROME	0.3725	4	17	120	1.26667	0.341037	0.212261	0.67313
Q7PLL6	CG17514, isoform A GN=CG17514	Q7PLL6_DROME	0.1529	2	39	117	1.29167	0.369234	0.548919	0.260492
Q7PLS8	Integrator complex subunit 3 homolog GN=IntS3	INT3_DROME	0.0993	2	10	25	1.33333	0.415037	0.5265	0.278602
Q7YU24	Transmembrane GTPase Marf GN=Marf	MARF_DROME	0.1284	1	10	33	1.04167	0.0588937	0.912034	0.0399888
Q7YZA2	Uncharacterized protein CG7065 GN=CG7065	Y7065_DROME	0.0877	1	8	22	2.11111	1.078	0.275021	0.560634
Q867Z4	Longitudinals lacking protein, isoforms F/I/K/T GN=lola	LOLA4_DROME	0.133	17	4	97	0.910256	-0.135655	0.229094	0.639987
Q868Z9	Papilin GN=Ppn	PPN_DROME	0.2933	4	65	432	1.16667	0.222392	0.40431	0.393286
Q86B44	Glutathione synthetase GN=GS	Q86B44_DROME	0.2456	5	12	78	1.11111	0.152003	0.591313	0.228183
Q86B79	RING finger protein unkempt GN=unk	UNK_DROME	0.3907	1	20	102	1.14493	0.195256	0.619596	0.207891
Q86B87	Modifier of mdg4 GN=mod(mdg4)	MMD4_DROME	0.1852	31	7	52	1	0	1	0
Q86B97	Midline fasciclin, isoform H GN=mfas	Q86B97_DROME	0.1436	6	10	34	0.925926	-0.111031	0.776448	0.109888
Q86BA1-3	Isoform B of Protein-methionine sulfoxide oxidase Mical GN=Mical - [MICAL_DROME]	MICAL_DROME	0.0999	5	24	62	0.958333	-0.0614005	0.921762	0.0353813
Q86BB4	Transforming acidic coiled-coil protein, isoform E GN=tacc	Q86BB4_DROME	0.5224	1	1	114	0.933333	-0.0995357	0.546061	0.262758
Q86BH5	RE14101p GN=Zasp66	Q86BH5_DROME	0.4593	4	1	30	0.435897	-1.19794	0.000943752	3.02514
Q86BI3	CG5215-PB, isoform B GN=Zn72D	Q86BI3_DROME	0.3213	3	24	180	1.16667	0.222392	0.398956	0.399075
Q86BM5	A kinase anchor protein 200, isoform G GN=Akap200	Q86BM5_DROME	0.2724	1	4	394	1.14232	0.19197	0.474805	0.323485
Q86BS3	Chromator, isoform A GN=Chro	Q86BS3_DROME	0.3715	1	29	194	1.17054	0.227177	0.25755	0.589138
Q86BS5	CG10971-PB, isoform B GN=Hip1	Q86BS5_DROME	0.1196	2	12	33	0.354167	-1.4975	0.00494616	2.30573
Q86BY9	Protein rigor mortis GN=rig	RIG_DROME	0.1085	1	13	56	1.36364	0.447459	0.36798	0.434176
Q86NP2	Negative elongation factor A GN=Nelf-A	NELFA_DROME	0.1375	1	12	47	1.90476	0.929611	0.032782	1.48436
Q86PD3	CG30022 GN=CG30022;CG30023	Q86PD3_DROME	0.3441	1	9	47	0.972222	-0.040642	0.90095	0.0452995
Q86S05-3	Isoform B of Protein lingerer GN=lig - [LIG_DROME]	LIG_DROME	0.1749	3	15	197	1.15909	0.212994	0.272348	0.564876
Q8I0A0	CG5854, isoform B GN=CG5854	Q8I0A0_DROME	0.2067	2	6	34	3.44444	1.78427	0.0630401	1.20038
Q8I0G5-2	Isoform A of Coatomer subunit gamma GN=gammaCop - [COPG_DROME]	COPG_DROME	0.1741	2	1	65	0.941176	-0.0874628	0.724605	0.139899
Q8I0G5-3	Isoform C of Coatomer subunit gamma GN=gammaCop - [COPG_DROME]	COPG_DROME	0.1731	2	1	70	1.03922	0.0554951	0.818177	0.0871526
Q8I937	CG32409 GN=CG32409	Q8I937_DROME	0.2006	1	7	41	1.375	0.459432	0.500894	0.300254
Q8IH14	LD21345p GN=ssx	Q8IH14_DROME	0.1603	2	6	47	1.40741	0.49304	0.352823	0.452443
Q8IM86	Unc-13, isoform B GN=unc-13	Q8IM86_DROME	0.0377	6	11	27	0.666667	-0.584963	0.472653	0.325458
Q8IM93	CG32017, isoform B GN=CG32017-RB	Q8IM93_DROME	0.4004	1	17	93	1.14286	0.192645	0.525069	0.279784
Q8IMJ0	CG31030, isoform A GN=CG31030	Q8IMJ0_DROME	0.1823	2	6	42	1.06667	0.0931094	0.776448	0.109888
Q8IML5	V-type proton ATPase subunit a GN=Vha100-1	Q8IML5_DROME	0.1741	6	12	97	0.677083	-0.562595	0.19136	0.718149
Q8IMP0	CG31064, isoform E GN=CG31064	Q8IMP0_DROME	0.1392	1	4	30	3	1.58496	0.0293332	1.53264
Q8IMQ8	CG6330, isoform B GN=CG6330-RB	Q8IMQ8_DROME	0.219	2	7	39	1.11111	0.152003	0.780568	0.10759
Q8IMS8	FI20028p1 GN=msi	Q8IMS8_DROME	0.2256	2	9	70	1.125	0.169925	0.419753	0.377006
Q8IMU9	CG11120, isoform B GN=Mink	Q8IMU9_DROME	0.1584	2	7	29	0.633333	-0.658963	0.228597	0.64093
Q8IMV6	CG6995, isoform B GN=Saf-B	Q8IMV6_DROME	0.3103	3	32	236	1	0	1	0
Q8IMW2	Ubiquitin carboxyl-terminal hydrolase GN=puf	Q8IMW2_DROME	0.0562	3	17	63	0.77193	-0.373458	0.478012	0.320561
Q8IN64	CG4538, isoform B GN=CG4538	Q8IN64_DROME	0.3001	2	14	74	1.11765	0.160465	0.506021	0.295831
Q8IN89	PP2A-B', isoform B GN=PP2A-B'	Q8IN89_DROME	0.1291	3	1	41	1.03333	0.0473057	0.893565	0.0488739
Q8INA9	Fasciclin 1, isoform C GN=Fas1	Q8INA9_DROME	0.284	6	16	134	0.873874	-0.194503	0.16249	0.789175
Q8INB9	RAC serine/threonine-protein kinase GN=Akt1	AKT1_DROME	0.1375	2	9	49	1.15152	0.203533	0.5265	0.278602
Q8INE8	Arginine methyltransferase 3, isoform B GN=Art3	Q8INE8_DROME	0.211	2	9	44	1.13333	0.180572	0.704853	0.151902
Q8INH5	CG32473, isoform B GN=CG32473-RB	Q8INH5_DROME	0.1672	3	1	90	0.278912	-1.84212	4.48466e-07	6.34827
Q8INJ4	CG12213, isoform B GN=CG12213-RB	Q8INJ4_DROME	0.214	3	7	19	0.458333	-1.12553	0.142438	0.846373
Q8INM3-2	Isoform B of Protein slender lobes GN=sle - [SLE_DROME]	SLE_DROME	0.3056	3	37	274	1.02985	0.0424353	0.850993	0.0700741
Q8IP62	Mitochondrial ribosomal protein S23 GN=mRpS23	Q8IP62_DROME	0.4339	1	7	45	1.54167	0.624491	0.142438	0.846373
Q8IP72	CG6866-PA, isoform A GN=loqs	Q8IP72_DROME	0.1122	4	1	26	0.904762	-0.14439	0.724605	0.139899
Q8IP80	Phosphoethanolamine cytidylyltransferase, isoform D GN=Pect	Q8IP80_DROME	0.2441	4	9	42	2	1	0.0529078	1.27648
Q8IP94	CG5353-PB, isoform B GN=Aats-thr	Q8IP94_DROME	0.4217	2	25	212	1.34921	0.432111	0.173814	0.759914
Q8IP97	CG5325-PA, isoform A GN=Pex19	Q8IP97_DROME	0.3219	1	7	49	1.3	0.378512	0.3234	0.49026
Q8IPB9	CG31716-PG, isoform G GN=Cnot4	Q8IPB9_DROME	0.0965	6	9	51	1.08333	0.115477	0.697261	0.156605
Q8IPE8	CG4389-PB, isoform B GN=Mtpalpha	Q8IPE8_DROME	0.2742	2	20	135	1.16667	0.222392	0.298842	0.524558
Q8IPF5	A kinase anchor protein 200, isoform B GN=Akap200	Q8IPF5_DROME	0.3441	1	1	351	1.0935	0.128948	0.668452	0.17493
Q8IPG9	Basigin, isoform B GN=Bsg	Q8IPG9_DROME	0.2642	3	6	23	0.518519	-0.947533	0.107718	0.96771
Q8IPK0	CG31641-PB, isoform B GN=stai	Q8IPK0_DROME	0.447	3	1	118	1.07143	0.0995357	0.666968	0.175895
Q8IPM8	Complexin GN=cpx	CPLX_DROME	0.6549	9	9	93	1.29825	0.376563	0.321238	0.493172															0.493172
Q8IPN1	Transforming acidic coiled-coil protein, isoform A GN=tacc	Q8IPN1_DROME	0.3124	4	22	219	0.993939	-0.00877021	0.96051	0.0174983
Q8IPN9	L(3)82Fd, isoform K GN=mtd	Q8IPN9_DROME	0.2464	15	20	104	1.05333	0.0749621	0.704853	0.151902
Q8IPT9	CG10512, isoform C GN=CG10512-RD	Q8IPT9_DROME	0.2382	3	7	53	0.844444	-0.243926	0.500362	0.300716
Q8IPZ5	CG9641-PB, isoform B GN=CG9641	Q8IPZ5_DROME	0.1761	2	8	37	1.20833	0.273018	0.540301	0.267364
Q8IQA6	Grunge, isoform A GN=Gug	Q8IQA6_DROME	0.1236	8	18	105	0.873563	-0.195016	0.352823	0.452443
Q8IQM5	CG7656, isoform F GN=CG7656	Q8IQM5_DROME	0.1861	1	1	31	1.38889	0.473931	0.0828138	1.0819
Q8IQQ0	CG11661-PF, isoform F GN=Nc73EF	Q8IQQ0_DROME	0.3048	5	2	178	1.11382	0.155518	0.495988	0.304529
Q8IQS5	CG32195, isoform A GN=CG32195	Q8IQS5_DROME	0.1446	1	6	29	2.88889	1.53051	0.145484	0.837185
Q8IQW5	CG14207-PB, isoform B GN=HspB8	Q8IQW5_DROME	0.6042	2	2	80	1.88889	0.917538	0.0472463	1.32563
Q8IQX5	CG6891, isoform C GN=CG6891	Q8IQX5_DROME	0.4521	2	8	27	4.16667	2.05889	0.137956	0.860259
Q8IQZ7	CG8649-PD, isoform D GN=Fim	Q8IQZ7_DROME	0.3791	2	1	181	0.744048	-0.426533	0.00708685	2.14955
Q8IR23	CG9209-PA, isoform A GN=vap	Q8IR23_DROME	0.1342	1	12	53	1.27273	0.347923	0.37941	0.420891
Q8IRB6	Beta-hexosaminidase GN=Hexo1	Q8IRB6_DROME	0.1089	2	7	28	1.22222	0.289507	0.419753	0.377006
Q8IRG6-2	Isoform A of FACT complex subunit spt16 GN=dre4 - [SPT16_DROME]	SPT16_DROME	0.2362	2	27	140	1.08081	0.11211	0.419753	0.377006
Q8IRH5-2	Isoform A of Zinc finger protein CG2199 GN=CG2199 - [Y2199_DROME]	Y2199_DROME	0.1436	2	8	36	1	0	1	0
Q8IRQ5	LP02262p GN=l(1)G0255	Q8IRQ5_DROME	0.2784	2	12	69	1.10417	0.142958	0.476294	0.322125
Q8MKJ5	CG30197 GN=CG30197	Q8MKJ5_DROME	0.3628	1	3	28	1.22222	0.289507	0.315334	0.50123
Q8MLQ5	CG5594, isoform D GN=kcc	Q8MLQ5_DROME	0.0875	2	1	27	0.416667	-1.26303	0.00420488	2.37625
Q8MLS0	CG13551, isoform C GN=CG13551	Q8MLS0_DROME	0.7356	2	7	58	1.42424	0.510195	0.295572	0.529336
Q8MLS2	CG30410 GN=Rpi	Q8MLS2_DROME	0.3651	1	7	41	2.4	1.26303	0.115087	0.938973
Q8MLS7	Lethal (2) k09913, isoform D GN=l(2)k09913	Q8MLS7_DROME	0.2722	2	8	47	1.40741	0.49304	0.262998	0.580048
Q8MLY8	40S ribosomal protein S8 GN=RpS8	RS8_DROME	0.5481	1	10	206	1.15942	0.213404	0.561979	0.25028
Q8MLZ7	Chitinase-like protein Idgf3 GN=Idgf3	IDGF3_DROME	0.1973	2	7	33	0.888889	-0.169925	0.506021	0.295831
Q8MMC4	Protein CDV3 homolog GN=CG3760	CDV3_DROME	0.6937	1	2	233	1.05357	0.0752881	0.667742	0.175391
Q8MMC4-2	Isoform B of Protein CDV3 homolog GN=CG3760 - [CDV3_DROME]	CDV3_DROME	0.6943	1	1	243	1.1131	0.154577	0.525578	0.279363
Q8MMD3	Epidermal growth factor receptor pathway substrate clone 15, isoform C GN=Eps-15	Q8MMD3_DROME	0.2767	3	28	158	1.17143	0.228269	0.173659	0.760304
Q8MQJ5	CG31122, isoform B GN=CG7687	Q8MQJ5_DROME	0.2061	2	10	21	6.66667	2.73697	0.118767	0.925305
Q8MQJ9	Brain tumor protein GN=brat	BRAT_DROME	0.1581	2	13	70	2	1	0.0465282	1.33228
Q8MR62	Viral IAP-associated factor homolog GN=viaf	VIAF1_DROME	0.3667	1	9	58	1.81481	0.859822	0.00663535	2.17814
Q8MRC7	DISCO interacting protein 1, isoform E GN=DIP1	Q8MRC7_DROME	0.2302	6	5	29	2.08333	1.05889	0.0253952	1.59525
Q8MRM6	CG12065, isoform C GN=CG12065	Q8MRM6_DROME	0.3011	2	18	100	0.857143	-0.222392	0.445416	0.351235
Q8MS38	CG33217-PA GN=CG33217	Q8MS38_DROME	0.0758	1	5	29	0.875	-0.192645	0.603645	0.219218
Q8MSS1	Protein lava lamp GN=lva	LVA_DROME	0.281	1	66	254	1.01058	0.0151864	0.919188	0.0365956
Q8MST5	Beta-Tubulin at 97EF, isoform B GN=betaTub97EF	Q8MST5_DROME	0.2823	2	6	154	1.5679	0.648835	0.0798725	1.0976									1.0976
Q8MSV2-1	Isoform A of Protein alan shepard GN=shep - [SHEP_DROME]	SHEP_DROME	0.1003	2	1	59	1.30556	0.384664	0.145752	0.836385
Q8MSV2-2	Isoform B of Protein alan shepard GN=shep - [SHEP_DROME]	SHEP_DROME	0.1222	1	1	59	1.30556	0.384664	0.113704	0.944225
Q8MSV2-7	Isoform H of Protein alan shepard GN=shep - [SHEP_DROME]	SHEP_DROME	0.1671	3	2	59	1.17949	0.23816	0.307058	0.51278
Q8MSW0	Isoleucyl-tRNA synthetase, isoform A GN=Aats-ile	Q8MSW0_DROME	0.2596	1	28	153	1.16667	0.222392	0.468728	0.329079
Q8MSX1-2	Isoform 2 of Protein encore GN=enc - [ENC_DROME]	ENC_DROME	0.0898	7	9	37	1.42857	0.514573	0.310361	0.508133
Q8MT06	Guanine nucleotide-binding protein-like 3 homolog GN=Ns1	GNL3_DROME	0.2238	1	11	67	1.38462	0.469485	0.0598943	1.22261
Q8MT58	CG17337 GN=CG17337	Q8MT58_DROME	0.3954	1	18	168	1	0	1	0
Q8MTZ6	Nocturin GN=cu	Q8MTZ6_DROME	0.1626	3	7	38	0.818182	-0.289507	0.614927	0.211176
Q8MV37	Myosin binding subunit of myosin phosphatase GN=Mbs	Q8MV37_DROME	0.0936	8	1	42	0.939394	-0.0901978	0.603645	0.219218
Q8MYU6	CG9368-PB, isoform B GN=CG9368	Q8MYU6_DROME	0.3107	3	4	31	1.14286	0.192645	0.659743	0.180626
Q8MZI3	CG10077, isoform D GN=CG10077	Q8MZI3_DROME	0.3912	2	23	230	1.23129	0.300174	0.306436	0.513661
Q8SWR8	Ataxin-2 homolog GN=Atx2	ATX2_DROME	0.2343	3	17	90	1.80952	0.85561	0.0416301	1.38059
Q8SWU4	CG4577, isoform A GN=CG4577	Q8SWU4_DROME	0.1955	1	1	46	1.2	0.263034	0.562764	0.249673
Q8SWU7	Obg-like ATPase 1 GN=CG1354	OLA1_DROME	0.2821	2	12	53	1.43333	0.519374	0.00834703	2.07847
Q8SX57	CG31549 GN=CG11005	Q8SX57_DROME	0.3191	1	7	31	10	3.32193	0.0781407	1.10712
Q8SX68	Uncharacterized protein CG10915 GN=CG10915	Y0915_DROME	0.3547	1	18	75	2.16667	1.11548	0.00391748	2.40699
Q8SX89	Kugelkern, isoform A GN=kuk	Q8SX89_DROME	0.3491	1	15	134	1.2619	0.335603	0.00663535	2.17814
Q8SXM8	Lysine--tRNA ligase GN=Aats-lys	Q8SXM8_DROME	0.392	2	20	89	1.52083	0.604862	0.228324	0.641449
Q8SXP8	GH09868p GN=TBPH	Q8SXP8_DROME	0.1676	2	7	30	1.33333	0.415037	0.26657	0.574189
Q8SXQ1	CG9629 GN=CG9629	Q8SXQ1_DROME	0.1926	1	9	46	0.846154	-0.241008	0.481618	0.317297
Q8SXX1	Phosphatidylinositol 5-phosphate 4-kinase, isoform A GN=PIP4K	Q8SXX1_DROME	0.3614	1	13	73	1.09804	0.13493	0.494743	0.30562
Q8SY33-2	Isoform I of Protein Gawky GN=gw - [GAWKY_DROME]	GAWKY_DROME	0.1231	3	13	83	1.39583	0.481127	0.0825809	1.08312
Q8SYD9	Endophilin B, isoform A GN=EndoB	Q8SYD9_DROME	0.3462	2	1	73	1.09804	0.13493	0.626884	0.202813
Q8SYG2	COP9 signalosome complex subunit 3 GN=CSN3	CSN3_DROME	0.2562	1	10	59	1.85185	0.888969	0.118274	0.92711
Q8SYL1	Lethal (2) 09851 GN=l(2)09851	Q8SYL1_DROME	0.1338	1	4	33	1.86667	0.900464	0.153476	0.813958
Q8SYQ8	CG3420 GN=CG3420	Q8SYQ8_DROME	0.3456	1	5	37	0.787879	-0.343954	0.307058	0.51278
Q8SYR3	RE39606p GN=Rsf1	Q8SYR3_DROME	0.425	2	9	85	1.08333	0.115477	0.603645	0.219218
Q8T060	CG12304, isoform B GN=CG12304-RB	Q8T060_DROME	0.1927	2	7	29	1.6	0.678072	0.0293332	1.53264
Q8T079	Putative oxidoreductase GLYR1 homolog GN=CG4747	GLYR1_DROME	0.3189	1	1	112	1.53333	0.616671	0.0750098	1.12488
Q8T088	WD repeat-containing protein 55 homolog GN=CG14722	WDR55_DROME	0.2229	1	9	36	2.06667	1.04731	0.346422	0.460394
Q8T0L3	GH24511p GN=Uba1	Q8T0L3_DROME	0.3048	1	29	312	1.31746	0.39776	0.0884361	1.05337
Q8T0N3	CG30359, isoform B GN=Mal-A5	Q8T0N3_DROME	0.1461	2	7	32	1	0	1	0
Q8T0Q4	GH13992p GN=shrb	Q8T0Q4_DROME	0.6106	1	12	162	1.2549	0.327575	0.08356	1.078
Q8T0S6	Serine/threonine-protein kinase hippo GN=hpo	HIPPO_DROME	0.136	1	8	32	1.19048	0.251539	0.693239	0.159117
Q8T389	Endophilin B GN=EndoB	Q8T389_DROME	0.3466	2	1	58	1.15385	0.206451	0.506021	0.295831
Q8T390	Endophilin-A GN=endoA	SH3G3_DROME	0.3144	1	12	95	1.25	0.321928	0.277779	0.556301															0.556301
Q8T3U2	40S ribosomal protein S23 GN=RpS23	RS23_DROME	0.4685	1	6	81	1.59524	0.673772	0.171548	0.765615
Q8T4C4	ATP synthase subunit beta GN=ms(3)72Dt	Q8T4C4_DROME	0.0949	1	1	37	1.42857	0.514573	0.0781407	1.10712						1.10712
Q8T4F7-2	Isoform 2 of Protein enabled GN=ena - [ENA_DROME]	ENA_DROME	0.1477	4	8	61	1.23077	0.29956	0.0781407	1.10712
Q8T6B9	Poly(U)-binding-splicing factor half pint GN=pUf68	PUF68_DROME	0.2543	2	14	80	1.23529	0.304855	0.445416	0.351235
Q8T6I0	EH domain containing protein GN=Past1	Q8T6I0_DROME	0.2603	2	14	69	0.944444	-0.0824622	0.697261	0.156605
Q8T8R1	CCHC-type zinc finger protein CG3800 GN=CG3800	Y3800_DROME	0.697	1	13	244	1	0	1	0
Q8T9B6	LDLR chaperone boca GN=boca	MESD_DROME	0.3778	1	9	91	1.18333	0.242857	0.145752	0.836385
Q94511	NADH-ubiquinone oxidoreductase 75 kDa subunit, mitochondrial GN=ND75	NDUS1_DROME	0.3215	1	20	156	1.24242	0.313158	0.14061	0.851984						0.851984
Q94513	Boundary element associated factor GN=BEAF-32	Q94513_DROME	0.2624	1	2	39	1.83333	0.874469	0.123167	0.909505
Q94514	Cytochrome c oxidase subunit 5A, mitochondrial GN=CoVa	COX5A_DROME	0.349	1	7	59	2.94444	1.558	0.269359	0.569669						0.569669					0.569669
Q94516	ATP synthase subunit b, mitochondrial GN=ATPsyn-b	AT5F1_DROME	0.2675	1	7	61	1.36111	0.444785	0.119537	0.922498						0.922498
Q94517	Histone deacetylase Rpd3 GN=Rpd3	HDAC1_DROME	0.2917	1	11	65	1.83333	0.874469	0.0982177	1.00781
Q94518	Nascent polypeptide-associated complex subunit alpha GN=Nacalpha	NACA_DROME	0.5622	1	8	204	1.41026	0.495957	0.205655	0.686861
Q94522	Succinyl-CoA ligase [ADP/GDP-forming] subunit alpha, mitochondrial GN=Scsalpha	SUCA_DROME	0.3689	2	10	138	1.30952	0.389042	0.101733	0.992538
Q94523	Succinate dehydrogenase [ubiquinone] flavoprotein subunit, mitochondrial GN=SdhA	SDHA_DROME	0.2572	1	14	107	0.987654	-0.0179219	0.93615	0.0286547
Q94524	Dynein light chain Tctex-type GN=Dlc90F	DYLT_DROME	0.2973	1	2	21	6.66667	2.73697	0.104907	0.979194
Q94529	Probable pseudouridine-5'-monophosphatase GN=Gs1l	GS1_DROME	0.2381	2	5	50	1.18182	0.241008	0.481618	0.317297
Q94535	Splicing factor U2af 38 kDa subunit GN=U2af38	U2AF1_DROME	0.2462	1	6	28	1.53333	0.616671	0.0709877	1.14882
Q94546	Another transcription unit protein GN=Atu	ATU_DROME	0.0662	1	5	25	1.05556	0.0780025	0.85462	0.0682269
Q94547-2	Isoform B of Regulator of gene activity GN=Rga - [RGA_DROME]	RGA_DROME	0.1088	2	6	39	1.11111	0.152003	0.37941	0.420891
Q94883	DNA replication-related element factor, isoform A GN=Dref	Q94883_DROME	0.2045	1	14	66	1.2381	0.308122	0.298842	0.524558
Q94887	Neurexin-4 GN=Nrx-IV	NRX4_DROME	0.0771	2	9	36	0.757576	-0.400538	0.346422	0.460394															0.460394
Q94901	RNA-binding protein lark GN=lark	LARK_DROME	0.4716	1	18	175	1.75	0.807355	0.0196171	1.70737
Q94920	Voltage-dependent anion-selective channel GN=porin	VDAC_DROME	0.4397	1	11	173	0.977273	-0.0331669	0.883042	0.0540189
Q95028	L-lactate dehydrogenase GN=ImpL3	LDH_DROME	0.4187	1	11	159	2.07576	1.05364	0.189196	0.723089
Q95029-2	Isoform A of Cathepsin L GN=Cp1 - [CATL_DROME]	CATL_DROME	0.3255	2	9	72	1	0	1	0
Q95083	Proteasome subunit alpha type-5 GN=Prosalpha5	PSA5_DROME	0.4098	1	10	94	4.14286	2.05063	0.0191865	1.717				1.717
Q95NU8	GH16255p GN=jeb	Q95NU8_DROME	0.1554	1	8	39	0.966667	-0.0489096	0.85462	0.0682269
Q95R98	Protein phosphatase methylesterase 1 GN=CG5068	Q95R98_DROME	0.1858	1	7	26	4	2	0.0293332	1.53264
Q95RA9	CG9796 GN=GILT1	Q95RA9_DROME	0.268	1	5	25	2.44444	1.28951	0.107718	0.96771
Q95RB1	CG14641 GN=CG14641	Q95RB1_DROME	0.1364	1	5	30	0.916667	-0.125531	0.680138	0.167403
Q95RE4	LD37574p GN=yps	Q95RE4_DROME	0.6534	2	23	319	1.23039	0.299118	0.0126764	1.89701
Q95RJ9	F-box-like/WD repeat-containing protein ebi GN=ebi	EBI_DROME	0.1614	1	10	46	1.06061	0.0848889	0.884237	0.0534316
Q95RN0-2	Isoform B of UPF0528 protein CG10038 GN=CG10038 - [U528_DROME]	U528_DROME	0.233	2	6	28	4.33333	2.11548	0.0249432	1.60305
Q95RR6	LD15002p GN=Pur-alpha	Q95RR6_DROME	0.2445	4	6	28	1.22222	0.289507	0.419753	0.377006
Q95SH2	Charged multivesicular body protein 1, isoform A GN=Chmp1	Q95SH2_DROME	0.202	1	5	42	1.06667	0.0931094	0.806961	0.0931476
Q95SI7	CG6028 GN=CG6028	Q95SI7_DROME	0.57	1	13	98	1.48148	0.567041	0.194706	0.71062
Q95TA3	GH09289p GN=Tm1	Q95TA3_DROME	0.1542	2	1	81	0.952381	-0.0703893	0.739194	0.131242
Q95TW4	CG17838, isoform C GN=Syp	Q95TW4_DROME	0.3667	2	1	161	1.34375	0.426265	0.128197	0.892121
Q95U15	GH14252p GN=Mf	Q95U15_DROME	0.1699	8	6	43	0.769231	-0.378512	0.0293332	1.53264
Q95WY3	FI04781p GN=Nop56	Q95WY3_DROME	0.256	1	13	101	1.06944	0.0968615	0.603645	0.219218
Q960D3	SD06613p GN=vig2	Q960D3_DROME	0.4903	2	17	212	1	0	1	0
Q960D4	CG4199, isoform B GN=EG:22E5.5	Q960D4_DROME	0.253	2	14	52	1.24242	0.313158	0.556718	0.254365
Q960E4	CG8929, isoform A GN=CG8929	Q960E4_DROME	0.1993	2	11	48	1.12121	0.165059	0.536963	0.270055
Q960M4	LD45324p GN=Prx5	Q960M4_DROME	0.4421	1	7	70	1.22222	0.289507	0.275021	0.560634
Q960T2-3	Isoform I of Synapse-associated protein of 47 kDa GN=Sap47 - [SAP47_DROME]	SAP47_DROME	0.3775	2	1	132	1.2963	0.374396	0.376609	0.42411
Q960T2-5	Isoform G of Synapse-associated protein of 47 kDa GN=Sap47 - [SAP47_DROME]	SAP47_DROME	0.3533	3	5	164	1.27451	0.349942	0.370599	0.431096
Q960V1	CG32067-PC, isoform C GN=simj	Q960V1_DROME	0.1546	4	11	47	1.90476	0.929611	0.163607	0.786198
Q960X8	Hepatocyte growth factor-regulated tyrosine kinase substrate GN=Hrs	HRS_DROME	0.1566	2	10	49	1.15152	0.203533	0.494743	0.30562
Q960Z0	Kinesin-like protein Klp10A GN=Klp10A	KI10A_DROME	0.1366	1	10	46	1.06061	0.0848889	0.776448	0.109888									0.109888
Q961C3	CG8478, isoform B GN=CG8478	Q961C3_DROME	0.1208	3	6	36	1.16667	0.222392	0.419753	0.377006
Q961D9	Protein BCL9 homolog GN=lgs	BCL9_DROME	0.1327	1	14	70	1.22222	0.289507	0.275021	0.560634
Q961R8	GH09263p GN=Aats-gly	Q961R8_DROME	0.3034	2	19	206	1.15942	0.213404	0.216158	0.665228
Q962I2	RAL2 GN=Rala	Q962I2_DROME	0.2386	2	4	25	1.05556	0.0780025	0.871929	0.059519
Q99323-2	Isoform 2 of Myosin heavy chain, non-muscle GN=zip - [MYSN_DROME]	MYSN_DROME	0.4168	4	1	790	1.18882	0.249536	0.289503	0.538346
Q9GQN5	Transcriptional regulator ATRX homolog GN=XNP	ATRX_DROME	0.0748	1	10	29	1.04762	0.0671142	0.909615	0.0411425
Q9GQR5	RH02809p GN=stai	Q9GQR5_DROME	0.5642	2	2	141	1.04902	0.0690416	0.732777	0.135028
Q9GU68	Eukaryotic translation initiation factor 5A GN=eIF-5A	IF5A_DROME	0.5157	1	9	213	1.63889	0.712718	0.0356654	1.44775													1.44775
Q9GYU8	Nuclear pore complex protein Nup88 GN=mbo	NUP88_DROME	0.1709	1	11	60	1.09524	0.131245	0.488053	0.311533			0.311533
Q9I7D3	Caprin homolog GN=Capr	CAPR1_DROME	0.3548	1	27	239	1.51938	0.603483	0.0274861	1.56089
Q9I7K0	Microtubule-associated protein Jupiter GN=Jupiter	JUPIT_DROME	0.8365	3	5	215	1.45833	0.544321	0.00181451	2.74124
Q9I7K0-2	Isoform A of Microtubule-associated protein Jupiter GN=Jupiter - [JUPIT_DROME]	JUPIT_DROME	0.7919	2	2	260	1.4	0.485427	0.00129573	2.88749
Q9I7K6	Protein NASP homolog GN=CG8223	NASP_DROME	0.3455	1	12	192	1.30769	0.387023	0.0529078	1.27648
Q9I7P8	CG4365, isoform B GN=CG4365	Q9I7P8_DROME	0.4096	3	10	111	1.14667	0.197446	0.160969	0.793258
Q9I7R0	CG18815, isoform A GN=CG18815	Q9I7R0_DROME	0.4213	3	7	46	1.85714	0.893085	0.0654412	1.18415
Q9I7S8	Multifunctional protein ADE2 GN=ade5	PUR6_DROME	0.1748	2	7	33	1.86667	0.900464	0.213593	0.670413
Q9I7T7-2	Isoform A of La-related protein CG11505 GN=CG11505 - [Y1505_DROME]	Y1505_DROME	0.1571	2	15	99	1.5	0.584963	0.0223064	1.65157
Q9N693	Brakeless-B GN=sbb	Q9N693_DROME	0.0539	4	10	31	2.25	1.16993	0.202606	0.693348
Q9NBD7	CLIP-associating protein GN=chb	CLASP_DROME	0.116	1	16	57	1.12821	0.174029	0.682347	0.165995									0.165995
Q9NDJ2-2	Isoform B of Helicase domino GN=dom - [DOM_DROME]	DOM_DROME	0.0713	4	14	51	1.21212	0.277534	0.569382	0.244596
Q9NF31	EG:BACN25G24.3 protein (Fbgn0004860;ph-d protein) GN=ph-d	Q9NF31_DROME	0.0522	2	1	34	0.925926	-0.111031	0.793375	0.100521
Q9NFU0	Fragile X mental retardation syndrome-related protein 1 GN=Fmr1	FMR1_DROME	0.3553	3	1	197	1.15909	0.212994	0.186197	0.730027
Q9NFU0-2	Isoform C of Fragile X mental retardation syndrome-related protein 1 GN=Fmr1 - [FMR1_DROME]	FMR1_DROME	0.3524	3	1	201	1.15556	0.208587	0.280785	0.551626
Q9NHD5	Probable N-acetyltransferase san GN=san	SAN_DROME	0.4348	1	6	27	1.91667	0.938599	0.293524	0.532356
Q9NHE5-5	Isoform 5 of Calcium-dependent secretion activator GN=Caps - [CAPS_DROME]	CAPS_DROME	0.1236	7	18	77	1.09259	0.127756	0.773334	0.111633
Q9NJH0	Elongation factor 1-gamma GN=Ef1gamma	EF1G_DROME	0.3527	1	16	270	1.36478	0.448668	0.197888	0.703581
Q9NK57	Putative GTP cyclohydrolase 1 type 2 GN=anon-35F/36A	GTPC1_DROME	0.3151	1	8	51	2.09524	1.06711	0.0876569	1.05721
Q9TVM2	Exportin-1 GN=emb	XPO1_DROME	0.1834	1	18	114	1.25	0.321928	0.341704	0.46635			0.46635
Q9TVP3	J domain-containing protein GN=jdp	JDP_DROME	0.6205	2	3	145	1.33333	0.415037	0.0759622	1.1194							1.1194
Q9TVP3-2	Isoform A of J domain-containing protein GN=jdp - [JDP_DROME]	JDP_DROME	0.6099	1	1	139	1.38272	0.467505	0.0619864	1.2077
Q9U1H9	Nuclear RNA export factor 1 GN=sbr	NXF1_DROME	0.1473	1	10	25	0.592593	-0.754888	0.302943	0.51864
Q9U3Z7	NHP2-like protein 1 homolog GN=hoip	NH2L1_DROME	0.3071	1	4	43	3.25	1.70044	0.0269283	1.56979
Q9U616	Glycine cleavage system H protein, mitochondrial GN=ppl	GCSH_DROME	0.2364	1	3	28	2	1	0.00542395	2.26568
Q9U6R9	GH13039p GN=gammaSnap1	Q9U6R9_DROME	0.4172	1	9	49	2.93333	1.55254	0.0564854	1.24806															1.24806
Q9U915	Adenylate kinase GN=Adk2	KAD2_DROME	0.4875	1	11	79	1.05263	0.0740006	0.821503	0.0853909
Q9U9Q4	Eukaryotic translation initiation factor 3 subunit H GN=eIF-3p40	EIF3H_DROME	0.3107	1	9	93	1.21667	0.282934	0.204289	0.689755													0.689755
Q9V345	COP9 signalosome complex subunit 4 GN=CSN4	CSN4_DROME	0.1744	1	7	29	9.33333	3.22239	0.0252825	1.59718
Q9V396	Carbonic anhydrase 1 GN=CAH1	Q9V396_DROME	0.4148	1	10	97	1.13636	0.184425	0.232779	0.633057
Q9V3A7	Structural maintenance of chromosomes protein GN=glu	Q9V3A7_DROME	0.2314	1	27	103	0.938272	-0.0919225	0.406129	0.391336
Q9V3A8	Ergic53, isoform A GN=ergic53	Q9V3A8_DROME	0.0918	1	5	25	0.708333	-0.4975	0.16249	0.789175
Q9V3B6	Protein CWC15 homolog GN=c12.1	CWC15_DROME	0.2548	1	6	36	1.38095	0.465664	0.133975	0.872978
Q9V3C0	ATP-dependent RNA helicase abstrakt GN=abs	DDX41_DROME	0.1519	1	9	26	0.904762	-0.14439	0.827641	0.0821578
Q9V3C7	CG10574-PA GN=I-2	Q9V3C7_DROME	0.4195	2	5	48	1.66667	0.736966	0.0134	1.8729
Q9V3E7	Aly GN=Ref1	Q9V3E7_DROME	0.4699	1	13	184	1.09302	0.128324	0.460773	0.336513
Q9V3E9	FI17138p1 GN=spag	Q9V3E9_DROME	0.1816	1	9	48	0.666667	-0.584963	0.163063	0.787645
Q9V3G1	60S ribosomal protein L8 GN=RpL8	RL8_DROME	0.3125	1	7	101	1.01333	0.0191088	0.878548	0.0562346
Q9V3G3	Peptidyl-prolyl cis-trans isomerase E GN=cyp33	PPIE_DROME	0.23	1	6	37	1.20833	0.273018	0.511387	0.29125							0.29125														0.29125
Q9V3G7	26S proteasome non-ATPase regulatory subunit 6 GN=Rpn7	PSMD6_DROME	0.2468	1	10	95	1.42593	0.511899	0.177994	0.749594				0.749594
Q9V3H2	26S proteasome non-ATPase regulatory subunit 14 GN=Rpn11	PSDE_DROME	0.1396	1	5	52	1	0	1	0				0
Q9V3H9	BcDNA.LD27873 GN=Nab2	Q9V3H9_DROME	0.1384	1	12	61	1.11905	0.162271	0.564648	0.248222
Q9V3I1	BcDNA.LD08534 GN=dUTPase	Q9V3I1_DROME	0.6489	2	11	147	1.41667	0.5025	0.062668	1.20295
Q9V3I2	Drab5 GN=Rab5	Q9V3I2_DROME	0.347	1	6	28	1.22222	0.289507	0.315334	0.50123
Q9V3J1	V-type proton ATPase subunit H GN=VhaSFD	VATH_DROME	0.2671	2	1	59	0.977778	-0.0324215	0.937856	0.0278639						0.0278639
Q9V3J1-2	Isoform B of V-type proton ATPase subunit H GN=VhaSFD - [VATH_DROME]	VATH_DROME	0.2269	1	1	66	0.960784	-0.0577155	0.878548	0.0562346
Q9V3J4	Sec13 GN=Sec13	Q9V3J4_DROME	0.1854	1	6	31	1.38889	0.473931	0.229094	0.639987
Q9V3J8	Protein will die slowly GN=wds	WDS_DROME	0.2687	1	8	33	3.33333	1.73697	0.0874807	1.05809
Q9V3K3	RuvB-like helicase 2 GN=rept	RUVB2_DROME	0.3222	1	16	149	1.21875	0.285402	0.201148	0.696485
Q9V3K7	CG3793, isoform A GN=BG:DS09217.4	Q9V3K7_DROME	0.2166	2	6	29	2.08333	1.05889	0.0473831	1.32438
Q9V3N7	BcDNA.HL02693 GN=CRMP	Q9V3N7_DROME	0.365	4	21	163	1.09649	0.132894	0.36018	0.443481
Q9V3P0	Peroxiredoxin 1 GN=Jafrac1	PRDX1_DROME	0.3763	1	5	249	1.51111	0.59561	0.0507141	1.29487														1.29487
Q9V3P3	LD45860p GN=REG	Q9V3P3_DROME	0.2694	1	7	41	1.375	0.459432	0.0529078	1.27648				1.27648
Q9V3P6	26S proteasome non-ATPase regulatory subunit 1 GN=Rpn2	PSMD1_DROME	0.3353	2	31	300	1.13725	0.185556	0.374817	0.42618				0.42618
Q9V3T8	CG5442-PB, isoform B GN=SC35	Q9V3T8_DROME	0.4103	2	9	121	1.10714	0.146841	0.36928	0.432644
Q9V3S9	Very long-chain-fatty-acid--CoA ligase bubblegum GN=bgm	BGM_DROME	0.1742	2	10	17	0	#NUM!	3.03197e-08	7.51828																						7.51828
Q9V3U2	H/ACA ribonucleoprotein complex subunit 2-like protein GN=NHP2	NHP2_DROME	0.4625	1	9	72	1.26667	0.341037	0.159931	0.796069
Q9V3U6	26-29kD-proteinase GN=26-29-p	O76521	0.1311	1	7	56	1	0	1	0
Q9V3V2	Fkbp13, isoform A GN=Fkbp14	Q9V3V2_DROME	0.4306	1	8	77	0.653846	-0.612977	0.0104017	1.98289							1.98289														1.98289
Q9V3V6	26S proteasome regulatory complex subunit p50 GN=Rpt5	Q9V3V6_DROME	0.4696	1	16	165	2.28571	1.19265	0.00912796	2.03963				2.03963
Q9V3V9	Endonuclease G inhibitor, isoform A GN=EndoGI	Q9V3V9_DROME	0.3816	1	12	115	1.14103	0.190331	0.228597	0.64093
Q9V3W7	LD40489p GN=SF2	Q9V3W7_DROME	0.5294	1	15	233	1.88571	0.915111	0.00906917	2.04243
Q9V3W9	DNA repair protein Rad23 GN=Rad23	Q9V3W9_DROME	0.4976	2	12	125	1.26923	0.343954	0.278003	0.555951
Q9V3Y0	Lethal (2) 35Be GN=l(2)35Be	Q9V3Y0_DROME	0.2837	1	6	32	1.44444	0.530515	0.0709877	1.14882
Q9V3Y2	Anamorsin homolog GN=CIAPIN1	DRE2_DROME	0.4395	1	9	49	2.38889	1.25634	0.00127667	2.89392
Q9V3Y5	BcDNA.LD23634 GN=BcDNA.LD23634	Q9V3Y5_DROME	0.2234	1	16	76	1.07407	0.103093	0.488053	0.311533
Q9V3Z4	GH11341p GN=Rpn5	Q9V3Z4_DROME	0.4323	1	20	175	0.907801	-0.139551	0.319234	0.495891				0.495891
Q9V405	26S proteasome regulatory complex subunit p48A GN=Rpt3	Q9V405_DROME	0.4964	2	20	149	1.32222	0.402965	0.255099	0.593291				0.593291
Q9V406	Activator protein 4 GN=crp	Q9V406_DROME	0.2235	1	10	43	0.861111	-0.215729	0.603645	0.219218
Q9V411	Probable nucleolar GTP-binding protein 1 GN=CG8801	NOG1_DROME	0.1979	1	13	36	1.16667	0.222392	0.665205	0.177045
Q9V426	LD07162p GN=vig	Q9V426_DROME	0.5388	1	28	305	1.09859	0.135655	0.245319	0.610268
Q9V431	Apoptosis inhibitor 5 homolog GN=Aac11	API5_DROME	0.3246	1	15	83	2.18182	1.12553	0.00217621	2.6623
Q9V434	Asparaginyl-tRNA synthetase, isoform A GN=Aats-asn	Q9V434_DROME	0.2025	1	14	97	1.20635	0.270648	0.131119	0.882333
Q9V436	26S proteasome regulatory complex subunit p30 GN=Rpn12	Q9V436_DROME	0.2841	1	8	61	3.05556	1.61143	0.00135484	2.86811				2.86811
Q9V438	Calcium-binding protein 1, isoform A GN=CaBP1	Q9V438_DROME	0.3857	1	14	112	1.63158	0.706269	0.0123664	1.90776
Q9V447	Krueppel homolog 2 GN=Kr-h2	KRH2_DROME	0.2428	1	6	26	0.62963	-0.667425	0.275021	0.560634
Q9V455	Importin subunit alpha GN=Kap-alpha3	Q9V455_DROME	0.2218	1	9	48	1.95238	0.965235	0.004928	2.30733			2.30733
Q9V460	Transcription elongation factor SPT5 GN=Spt5	SPT5H_DROME	0.2421	2	24	104	1.24242	0.313158	0.176845	0.752406
Q9V461	DNA replication licensing factor Mcm6 GN=Mcm6	MCM6_DROME	0.1812	1	13	62	2.61905	1.38904	0.00830141	2.08085
Q9V463	Nucleoporin 154kD, isoform A GN=Nup154	Q9V463_DROME	0.0784	1	10	41	0.805556	-0.311944	0.229094	0.639987			0.639987
Q9V466	BcDNA.LD18761 GN=Nup107	Q9V466_DROME	0.1018	1	8	34	0.925926	-0.111031	0.75454	0.122318			0.122318
Q9V468	Zinc finger matrin-type protein CG9776 GN=CG9776	Y9776_DROME	0.1103	2	10	41	1.375	0.459432	0.347497	0.459049
Q9V470	LD44970p GN=Sucb	Q9V470_DROME	0.3029	1	11	63	1.28205	0.358454	0.216158	0.665228
Q9V475	Cullin 3, isoform C GN=Cul3	Q9V475_DROME	0.1863	2	14	77	1.09259	0.127756	0.585511	0.232465
Q9V496	Apolipophorins GN=Rfabg	APLP_DROME	0.197	1	64	238	1.25333	0.32577	0.548441	0.26087
Q9V4C8-5	Isoform F of Host cell factor GN=Hcf - [HCF_DROME]	HCF_DROME	0.268	3	30	154	1.64103	0.714598	0.0163733	1.78586
Q9V4D4	CG2009-PA GN=bip2	Q9V4D4_DROME	0.0661	1	8	35	0.962963	-0.0544478	0.91427	0.0389257
Q9V4E0	CG1970, isoform B GN=CG1970-RA	Q9V4E0_DROME	0.1774	2	8	29	1.6	0.678072	0.459952	0.337287						0.337287
Q9V4E7	Transporter GN=CG1732	Q9V4E7_DROME	0.1085	2	6	35	0.638889	-0.646363	0.0253952	1.59525
Q9V4P1	Actin-binding protein anillin GN=scra	ANLN_DROME	0.1542	3	16	64	0.921569	-0.117836	0.76626	0.115624
Q9V4S8	COP9 signalosome complex subunit 7 GN=CSN7	CSN7_DROME	0.1619	1	4	25	1.75	0.807355	0.151454	0.819719
Q9V521	Phenoloxidase 2 GN=PPO2	PPO2_DROME	0.1287	1	8	16	5	2.32193	0.410391	0.386802
Q9V535	RNA-binding protein 8A GN=tsu	RBM8A_DROME	0.4545	1	7	67	1.0625	0.0874628	0.603645	0.219218
Q9V597	60S ribosomal protein L31 GN=RpL31	RL31_DROME	0.5484	1	8	77	1.5	0.584963	0.0549341	1.26016
Q9V5C6	Proteasome subunit alpha type-3 GN=Prosalpha7	PSA3_DROME	0.498	1	11	115	1.58333	0.662965	0.0368339	1.43375				1.43375
Q9V5M3-4	Isoform X of Longitudinals lacking protein, isoforms N/O/W/X/Y GN=lola - [LOLA6_DROME]	LOLA6_DROME	0.1844	16	2	81	0.952381	-0.0703893	0.659743	0.180626
Q9V5M6	Longitudinals lacking protein, isoforms J/P/Q/S/Z GN=lola	LOLA5_DROME	0.1194	17	2	83	0.984127	-0.0230836	0.897456	0.0469868
Q9V5Q4	Pre-mRNA-splicing factor Syf2 GN=Syf2	SYF2_DROME	0.3451	1	7	32	0.733333	-0.447459	0.398041	0.400072
Q9V677	Proteasome-associated protein ECM29 homolog GN=CG8858	ECM29_DROME	0.127	1	21	70	1.125	0.169925	0.801262	0.0962253				0.0962253
Q9V6K1-2	Isoform 2 of Tripeptidyl-peptidase 2 GN=TppII - [TPP2_DROME]	TPP2_DROME	0.3043	2	40	267	0.97549	-0.0358007	0.694705	0.158199
Q9V6U9	Probable trans-2-enoyl-CoA reductase, mitochondrial GN=CG16935	MECR_DROME	0.2773	1	8	46	1.37037	0.454566	0.248831	0.604096
Q9V7N5-2	Isoform A of V-type proton ATPase subunit C GN=Vha44 - [VATC_DROME]	VATC_DROME	0.4588	3	18	140	1.17204	0.229026	0.163063	0.787645
Q9V813	S-methyl-5'-thioadenosine phosphorylase GN=Mtap	MTAP_DROME	0.4221	1	12	54	1.16667	0.222392	0.419753	0.377006
Q9V895	Acidic leucine-rich nuclear phosphoprotein 32 family member A GN=Anp32a	AN32A_DROME	0.1992	2	6	63	1.16667	0.222392	0.0828138	1.0819
Q9V8M5	Probable 3-hydroxyisobutyrate dehydrogenase, mitochondrial GN=CG15093	3HIDH_DROME	0.213	1	6	30	1.66667	0.736966	0.219944	0.657688
Q9V8R9	Protein 4.1 homolog GN=cora	41_DROME	0.4694	3	37	630	1.1352	0.182944	0.0322746	1.49114
Q9V8R9-4	Isoform 4 of Protein 4.1 homolog GN=cora - [41_DROME]	41_DROME	0.4297	3	1	315	1.23383	0.303145	0.0717155	1.14439
Q9V8V8	PAR-1 GN=par-1	Q9V8V8_DROME	0.1887	2	1	53	0.928571	-0.106915	0.804174	0.0946501
Q9V9E3	Presequence protease, mitochondrial GN=CG3107	PREP_DROME	0.1015	1	9	29	9.33333	3.22239	0.00206337	2.68542
Q9V9K7	Serrate RNA effector molecule homolog GN=Ars2	SRRT_DROME	0.3383	3	32	189	1.24167	0.312278	0.121815	0.914299
Q9V9M7	RE62581p GN=RpL21	Q9V9M7_DROME	0.4528	2	8	53	1.875	0.906891	0.272348	0.564876
Q9V9N4	CG1832-PA, isoform A GN=Clamp	Q9V9N4_DROME	0.1569	2	8	33	1.2381	0.308122	0.455693	0.341327
Q9V9Q4	CG1416, isoform A GN=CG1416	Q9V9Q4_DROME	0.322	1	11	69	1.75758	0.813587	0.126997	0.896206
Q9V9R2	Cullin 2, isoform A GN=Cul2	Q9V9R2_DROME	0.1514	1	11	50	1.33333	0.415037	0.476294	0.322125
Q9V9S7-2	Isoform C of Rho GTPase-activating protein 100F GN=RhoGAP100F - [SYDE_DROME]	SYDE_DROME	0.1132	3	15	50	0.857143	-0.222392	0.614927	0.211176
Q9V9T4	ATP-dependent chromatin assembly factor large subunit GN=Acf1	Q9V9T4_DROME	0.0657	1	9	28	0.703704	-0.50696	0.501705	0.299551
Q9V9T5	CG2118, isoform A GN=CG2118	Q9V9T5_DROME	0.2378	2	15	64	1.44444	0.530515	0.0550413	1.25931
Q9V9U3	CG1910, isoform A GN=CG1910	Q9V9U3_DROME	0.6646	3	23	477	1.18095	0.239951	0.424459	0.372164
Q9V9U4	Deoxyhypusine hydroxylase GN=nero	DOHH_DROME	0.3477	1	8	41	6.5	2.70044	0.00758749	2.1199
Q9V9V7	LD23072p GN=pasha	Q9V9V7_DROME	0.1667	1	9	32	1.19048	0.251539	0.693239	0.159117
Q9V9W2	Ribosomal protein L6, isoform A GN=RpL6	Q9V9W2_DROME	0.2551	2	9	112	0.703704	-0.50696	0.0550413	1.25931
Q9V9X4	Methylthioribose-1-phosphate isomerase GN=CG11334	MTNA_DROME	0.239	1	8	46	0.944444	-0.0824622	0.680138	0.167403
Q9V9Z1	39S ribosomal protein L32, mitochondrial GN=mRpL32	RM32_DROME	0.2	1	4	40	0.878788	-0.186413	0.315334	0.50123
Q9VA18	Lethal (3) 03670 GN=l(3)03670	Q9VA18_DROME	0.3139	1	7	36	1.38095	0.465664	0.346422	0.460394
Q9VA36	CG31012, isoform C GN=cindr	Q9VA36_DROME	0.2653	4	17	73	1.40476	0.490326	0.231783	0.634918
Q9VA37	DJ-1 beta GN=dj-1beta	Q9VA37_DROME	0.278	1	5	57	1.12821	0.174029	0.455693	0.341327														0.341327
Q9VA83	Ferritin GN=Fer2LCH	Q9VA83_DROME	0.3789	1	9	96	1.35088	0.433897	0.241875	0.616409
Q9VA91	40S ribosomal protein S7 GN=RpS7	RS7_DROME	0.3918	2	9	103	1.22727	0.295456	0.140346	0.852799
Q9VAA9	CG7946 GN=CG7946	Q9VAA9_DROME	0.3432	1	12	71	1.35714	0.440573	0.308748	0.510396
Q9VAC1	CG7920, isoform A GN=CG7920	Q9VAC1_DROME	0.2348	2	10	142	1.19355	0.255257	0.127999	0.892795
Q9VAC4	CG7911 GN=CG7911	Q9VAC4_DROME	0.4872	1	5	127	1.50725	0.591915	0.175485	0.755761
Q9VAC9	CG7903 GN=CG7903	Q9VAC9_DROME	0.276	1	9	58	0.955556	-0.0655883	0.806961	0.0931476
Q9VAI6	General odorant-binding protein 99b GN=Obp99b	OB99B_DROME	0.1946	1	3	25	1.75	0.807355	0.103437	0.985323
Q9VAJ1	Condensin complex subunit 1 GN=Cap-D2	Q9VAJ1_DROME	0.0464	1	6	26	0.904762	-0.14439	0.603645	0.219218
Q9VAJ2	Bub3 GN=Bub3	Q9VAJ2_DROME	0.2853	1	10	66	1.2381	0.308122	0.004928	2.30733
Q9VAJ4	General odorant-binding protein 99a GN=Obp99a	OB99A_DROME	0.3451	1	6	71	1.81818	0.862496	0.0724877	1.13974
Q9VAL7	Calnexin 99A, isoform A GN=Cnx99A	Q9VAL7_DROME	0.2132	4	12	56	0.833333	-0.263034	0.457052	0.340035
Q9VAM6	CDGSH iron-sulfur domain-containing protein 2 homolog GN=CG1458	CISD2_DROME	0.2556	1	3	21	0.444444	-1.16993	0.223297	0.651117
Q9VAN6	Histone RNA hairpin-binding protein GN=Slbp	SLBP_DROME	0.3623	1	8	33	1.86667	0.900464	0.174678	0.757762
Q9VAN7	GH13304p GN=Pglym78	Q9VAN7_DROME	0.5412	2	11	131	2.23529	1.16046	0.0311356	1.50674
Q9VAQ7	Pre-mRNA-splicing factor Slu7 GN=Slu7	SLU7_DROME	0.2038	1	10	44	1	0	1	0
Q9VAT0	RE12101p GN=WASp	Q9VAT0_DROME	0.1822	2	7	30	1.33333	0.415037	0.37941	0.420891
Q9VAW1	Moca-cyp, isoform A GN=Moca-cyp	Q9VAW1_DROME	0.0948	2	6	41	0.909091	-0.137504	0.625301	0.203911
Q9VAW3	GH12731p GN=Gfat2	Q9VAW3_DROME	0.164	6	10	36	2.06667	1.04731	0.163063	0.787645
Q9VAW5	La-related protein 1 GN=larp	LARP_DROME	0.1781	3	26	135	0.990196	-0.0142139	0.935242	0.0290759
Q9VAX8	CG4849 GN=CG4849	Q9VAX8_DROME	0.2113	2	19	107	0.987654	-0.0179219	0.918272	0.0370286
Q9VAY2	Glycoprotein 93 GN=Gp93	Q9VAY2_DROME	0.385	1	31	341	1.10549	0.14468	0.475513	0.322837							0.322837
Q9VB04	Barentsz, isoform A GN=btz	Q9VB04_DROME	0.2418	2	15	76	1.07407	0.103093	0.680138	0.167403
Q9VB05	ALG-2 interacting protein X GN=ALiX	Q9VB05_DROME	0.2859	1	26	130	1.16092	0.215268	0.574823	0.240466
Q9VB10	CG5590 GN=CG5590	Q9VB10_DROME	0.2257	1	8	55	1.19444	0.25634	0.42636	0.370224
Q9VB13	Microtubule-associated protein GN=tau	Q9VB13_DROME	0.2438	1	8	68	1.08333	0.115477	0.488053	0.311533
Q9VB22	LD33695p GN=pins	Q9VB22_DROME	0.2416	1	13	69	0.816667	-0.292181	0.422455	0.374219
Q9VB23	BcDNA.LD34343 GN=wdb	Q9VB23_DROME	0.2557	1	13	100	1.05556	0.0780025	0.809958	0.0915373										0.0915373
Q9VB64	CG31063 GN=CG31063	Q9VB64_DROME	0.1361	1	5	28	4.33333	2.11548	0.0101755	1.99244
Q9VB69	Malic enzyme GN=Men-b	Q9VB69_DROME	0.2334	3	13	71	1.05882	0.0824622	0.762542	0.117736
Q9VB96	CG31075 GN=CG31075	Q9VB96_DROME	0.268	1	11	54	1.66667	0.736966	0.127999	0.892795											0.892795
Q9VBB3	CG5491 GN=IntS12	Q9VBB3_DROME	0.189	1	5	23	2.22222	1.152	0.189686	0.721966
Q9VBI2	UMP-CMP kinase GN=Dak1	Q9VBI2_DROME	0.4308	1	11	83	1.79487	0.843881	0.0412488	1.38459
Q9VBI3	CG14542 GN=Vps2	Q9VBI3_DROME	0.1992	1	6	28	1.53333	0.616671	0.238333	0.622817
Q9VBI4	Exo84, isoform A GN=Exo84	Q9VBI4_DROME	0.1461	2	9	28	0.703704	-0.50696	0.0134	1.8729															1.8729
Q9VBL3	CG5886 GN=CG5886	Q9VBL3_DROME	0.3223	1	16	114	1.07407	0.103093	0.603645	0.219218
Q9VBN5	60S ribosomal protein L27 GN=RpL27	Q9VBN5_DROME	0.1556	1	2	72	1.66667	0.736966	0.0498253	1.30255
Q9VBP6	GH21316p GN=Ssadh	Q9VBP6_DROME	0.3065	1	15	175	1.08943	0.123575	0.510468	0.292031
Q9VBP9-2	Isoform B of Nuclear protein localization protein 4 homolog GN=Npl4 - [NPL4_DROME]	NPL4_DROME	0.2099	2	13	60	1.20513	0.269187	0.279658	0.553372
Q9VBS7	CG10550, isoform A GN=CG10550	Q9VBS7_DROME	0.1412	1	6	22	1.13333	0.180572	0.776448	0.109888
Q9VBU4	CG11858 GN=CG11858	Q9VBU4_DROME	0.2231	1	3	31	1.14286	0.192645	0.762542	0.117736																					0.117736
Q9VBU7	Nup358 GN=Nup358	Q9VBU7_DROME	0.2122	1	52	352	1.09756	0.134301	0.16617	0.779447			0.779447
Q9VBU9	40S ribosomal protein S27 GN=RpS27	Q9VBU9_DROME	0.381	1	3	63	2.66667	1.41504	0.0414941	1.38201
Q9VBX1	Nuclear export mediator factor NEMF homolog GN=Clbn	NEMF_DROME	0.0897	1	8	40	1.14815	0.199309	0.488053	0.311533
Q9VBX4	CG31510 GN=CG31510-RA	Q9VBX4_DROME	0.147	1	14	49	0.923077	-0.115477	0.772087	0.112334
Q9VBY6	CG11820 GN=PQBP1	Q9VBY6_DROME	0.2511	1	5	33	1.04167	0.0588937	0.90095	0.0452995
Q9VBY7	RE46718p GN=veli	Q9VBY7_DROME	0.3692	2	7	53	1.27273	0.347923	0.0781407	1.10712
Q9VC00	Tenectin GN=tnc	Q9VC00_DROME	0.1159	1	25	145	1.39286	0.478047	0.0913674	1.03921
Q9VC18	CG11089 GN=CG11089	Q9VC18_DROME	0.2068	1	10	41	3.08333	1.62449	0.0089912	2.04618
Q9VC36	Polybromo GN=polybromo	Q9VC36_DROME	0.0852	1	13	42	1.06667	0.0931094	0.835767	0.077915
Q9VC48	Methionine aminopeptidase 1 GN=CG13630	Q9VC48_DROME	0.254	1	9	28	1.22222	0.289507	0.574154	0.240972
Q9VC66	AT25567p GN=CG6607	Q9VC66_DROME	0.298	1	10	37	1.42857	0.514573	0.173659	0.760304
Q9VC94	CG5728 GN=CG5728	Q9VC94_DROME	0.0797	1	10	32	1.19048	0.251539	0.488053	0.311533
Q9VC99	Probable uridine-cytidine kinase GN=CG6364	UCK_DROME	0.2615	2	6	38	1.07407	0.103093	0.603645	0.219218
Q9VCA5	Probable phenylalanine--tRNA ligase beta subunit GN=CG5706	SYFB_DROME	0.1715	1	9	29	2.08333	1.05889	0.204289	0.689755
Q9VCA8	Ankyrin repeat and KH domain-containing protein mask GN=mask	ANKHM_DROME	0.153	1	45	243	1.2549	0.327575	0.190356	0.720434
Q9VCB9	CG5515, isoform A GN=CG5515-RA	Q9VCB9_DROME	0.3238	1	7	45	3.41667	1.77259	0.0784131	1.10561
Q9VCC0	Cysteine and histidine-rich domain-containing protein GN=CHORD	CHRD1_DROME	0.2147	1	7	24	1.26667	0.341037	0.627766	0.202202
Q9VCC6	CG6178 GN=CG6178	Q9VCC6_DROME	0.1857	1	9	23	2.22222	1.152	0.320763	0.493815																						0.493815
Q9VCD8	Structural maintenance of chromosomes protein GN=SMC1	Q9VCD8_DROME	0.0977	1	12	55	0.888889	-0.169925	0.594881	0.22557
Q9VCE3	Rox8, isoform B GN=Rox8	Q9VCE3_DROME	0.1293	2	5	35	1.61111	0.688056	0.0464199	1.3333
Q9VCH1	Eukaryotic translation initiation factor 4G2 GN=eIF4G2	Q9VCH1_DROME	0.1506	1	25	105	0.962963	-0.0544478	0.864094	0.0634389
Q9VCH5	Nup98 GN=Nup98-96	Q9VCH5_DROME	0.1495	1	23	128	1.24691	0.318361	0.287208	0.541803			0.541803
Q9VCH8	LD23303p GN=tst	Q9VCH8_DROME	0.1086	1	12	26	0.904762	-0.14439	0.842842	0.0742541
Q9VCH9	CG10375, isoform A GN=CG10375	Q9VCH9_DROME	0.2441	2	6	25	0.708333	-0.4975	0.328524	0.483433
Q9VCI7	CG10225 GN=RanBP3	Q9VCI7_DROME	0.314	1	9	79	0.920635	-0.119299	0.340528	0.467847
Q9VCK0	Eukaryotic translation initiation factor 3 subunit D-1 GN=eIF-3p66	EI3D1_DROME	0.1679	2	9	65	1.21429	0.280108	0.0529078	1.27648													1.27648
Q9VCK6	CG10184 GN=CG10184	Q9VCK6_DROME	0.3238	1	11	51	1.08333	0.115477	0.823621	0.0842724
Q9VCM8	CG4408 GN=CG4408	Q9VCM8_DROME	0.1273	1	5	13	4	2	0.415646	0.381276
Q9VCR2	Aminoacylase-1 GN=CG6726	Q9VCR2_DROME	0.1671	1	7	35	1.33333	0.415037	0.124058	0.906376
Q9VCU6	HP1c GN=HP1c	Q9VCU6_DROME	0.1899	1	4	32	1.44444	0.530515	0.0134	1.8729
Q9VCV4	Iron regulatory protein 1A GN=Irp-1A	Q9VCV4_DROME	0.1253	1	8	39	1.52381	0.607683	0.129982	0.886117
Q9VCW3	LP09464p GN=Nup133	Q9VCW3_DROME	0.0592	1	7	22	1.5	0.584963	0.453253	0.343659			0.343659
Q9VCW6	GH03051p GN=Gclm	Q9VCW6_DROME	0.2105	1	7	27	0.416667	-1.26303	0.00861833	2.06458																		2.06458
Q9VCX3	Probable 39S ribosomal protein L45, mitochondrial GN=mRpL45	RM45_DROME	0.2521	1	10	27	1.46667	0.552541	0.412918	0.384136
Q9VCZ8	Probable prefoldin subunit 5 GN=CG7048	PFD5_DROME	0.5238	1	7	53	1.02564	0.0365259	0.864094	0.0634389							0.0634389
Q9VD51	Probable ATP-dependent RNA helicase pitchoune GN=pit	DDX18_DROME	0.1103	1	8	26	0.904762	-0.14439	0.419753	0.377006
Q9VD52	CG6015 GN=CG6015	Q9VD52_DROME	0.1736	1	11	36	1.16667	0.222392	0.315334	0.50123
Q9VD58	CG6439, isoform A GN=CG6439	Q9VD58_DROME	0.1676	1	6	31	0.958333	-0.0614005	0.827641	0.0821578
Q9VD98	CG7956, isoform A GN=CG7956-RA	Q9VD98_DROME	0.105	5	8	34	0.8	-0.321928	0.26657	0.574189
Q9VDD0	CG3353 GN=CG3353	Q9VDD0_DROME	0.1705	1	6	32	1.44444	0.530515	0.279658	0.553372
Q9VDD2	LD22662p GN=SNF4Agamma	Q9VDD2_DROME	0.085	4	1	32	1	0	1	0
Q9VDE2	CG5793 GN=CG5793	Q9VDE2_DROME	0.2237	1	4	25	1.75	0.807355	0.3234	0.49026
Q9VDF4	Cortactin GN=Cortactin	Q9VDF4_DROME	0.3417	1	20	162	1.05128	0.0721498	0.716329	0.144888
Q9VDH3	CG10830 GN=CG10830	Q9VDH3_DROME	0.25	1	7	32	2.33333	1.22239	0.08708	1.06008
Q9VDI1	LD46328p GN=Synd	Q9VDI1_DROME	0.3401	1	14	92	1.06061	0.0848889	0.574154	0.240972															0.240972
Q9VDK7	Signal recognition particle subunit SRP72 GN=Srp72	Q9VDK7_DROME	0.3631	1	21	134	1.2619	0.335603	0.228597	0.64093
Q9VDL2	LD40493p GN=TFAM	Q9VDL2_DROME	0.4358	2	14	99	0.986667	-0.0193653	0.943527	0.0252459
Q9VDP9	CG4390, isoform A GN=CG4390	Q9VDP9_DROME	0.1329	2	4	31	1.38889	0.473931	0.366297	0.436167
Q9VDQ3	CG4936 GN=CG4936	Q9VDQ3_DROME	0.1939	1	8	26	1.83333	0.874469	0.0735612	1.13335
Q9VDQ7	Phagocyte signaling-impaired protein GN=psidin	NAA25_DROME	0.116	1	10	44	1.2963	0.374396	0.373771	0.427395
Q9VDS5	Rho GTPase-activating protein 92B GN=RhoGAP92B	RG92B_DROME	0.1243	1	9	41	1.375	0.459432	0.151454	0.819719
Q9VDS6	Surfeit locus protein 6 homolog GN=Surf6	SURF6_DROME	0.1451	1	5	29	0.875	-0.192645	0.643762	0.191275
Q9VDV2	AT06125p GN=CG6195	Q9VDV2_DROME	0.2231	1	8	45	1.0303	0.0430687	0.904109	0.0437793
Q9VDV3	Probable nucleoporin Nup58 GN=Nup58	NUPL1_DROME	0.1538	1	8	28	1	0	1	0			0
Q9VDW3	Dystrophin, isoform B GN=Dys	DMDB_DROME	0.1983	3	7	101	1.01333	0.0191088	0.969545	0.0134322
Q9VDW6-2	Isoform C of Dystrophin, isoforms A/C/F/G/H GN=Dys - [DMDA_DROME]	DMDA_DROME	0.1035	7	6	97	0.677083	-0.562595	0.127423	0.894753
Q9VDY8	MIP08680p GN=vib	Q9VDY8_DROME	0.3934	1	10	61	1.23077	0.29956	0.173659	0.760304
Q9VDZ8	Mitochondrial import inner membrane translocase subunit TIM44 GN=CG11779-RB	Q9VDZ8_DROME	0.2874	3	13	54	1.05128	0.0721498	0.680138	0.167403
Q9VE08	CG6013 GN=CG6013	Q9VE08_DROME	0.385	1	6	31	1.14286	0.192645	0.37941	0.420891
Q9VE11	UPF0488 protein CG14286 GN=CG14286	U488_DROME	0.38	1	6	30	1.66667	0.736966	0.152822	0.815813
Q9VE52	Cleavage stimulation factor 64 kilodalton subunit GN=CstF-64	Q9VE52_DROME	0.2888	1	11	84	1.66667	0.736966	0.0670557	1.17356
Q9VE85	CG7671 GN=Nup43	Q9VE85_DROME	0.3352	1	10	64	2.03704	1.02647	0.0618347	1.20877			1.20877
Q9VEA1	Eukaryotic initiation factor 1A, isoform A GN=eIF-1A	Q9VEA1_DROME	0.3041	1	5	77	1.09259	0.127756	0.188027	0.72578													0.72578
Q9VEB1	CG7998 GN=Mdh2	Q9VEB1_DROME	0.3393	1	10	185	1.28947	0.366782	0.368077	0.434061
Q9VEB3	Ribosome production factor 2 homolog GN=CG7993	RPF2_DROME	0.3094	1	9	52	0.904762	-0.14439	0.627766	0.202202
Q9VEB9	Sequence-specific single-stranded DNA-binding protein, isoform A GN=Ssdp	Q9VEB9_DROME	0.1843	1	6	38	0.933333	-0.0995357	0.724605	0.139899
Q9VEF5	Inhibitor of growth protein GN=CG7379	Q9VEF5_DROME	0.1778	1	5	27	0.952381	-0.0703893	0.806961	0.0931476
Q9VEH0	Aluminum tubes, isoform A GN=alt	Q9VEH0_DROME	0.2838	2	20	99	0.558559	-0.84022	0.00640891	2.19322
Q9VEJ0	Peroxiredoxin 5037 GN=Prx3	Q9VEJ0_DROME	0.3077	1	7	57	1.39394	0.479168	0.331302	0.479777														0.479777
Q9VEJ1	LD36095p GN=SF1	Q9VEJ1_DROME	0.2135	1	13	86	1.17544	0.233199	0.575462	0.239984
Q9VEK8	GH07711p GN=sds22	Q9VEK8_DROME	0.227	1	7	28	4.33333	2.11548	0.0169647	1.77045
Q9VEL2	Brf, isoform A GN=Brf	Q9VEL2_DROME	0.1299	1	7	40	1	0	1	0													0
Q9VEN1	Filamin-A GN=cher	FLNA_DROME	0.3615	5	69	500	1.03279	0.0465426	0.570456	0.243778
Q9VEN3	FI20177p1 GN=GckIII	Q9VEN3_DROME	0.2025	1	10	32	2.33333	1.22239	0.148769	0.827489
Q9VEN9	Protein associated with topo II related-1 GN=Patr-1	Q9VEN9_DROME	0.1653	1	13	57	1.25	0.321928	0.296586	0.527849
Q9VEP9	CG16941 GN=CG16941	Q9VEP9_DROME	0.264	1	17	95	1.04348	0.0614005	0.829551	0.0811569
Q9VEV1	LD10376p GN=Pak3	Q9VEV1_DROME	0.1705	2	9	37	1.20833	0.273018	0.432498	0.364016
Q9VEV3	CG14894 GN=CG14894	Q9VEV3_DROME	0.5019	1	12	83	1.12281	0.16711	0.257663	0.588948
Q9VEX9	Histone deacetylase complex subunit SAP18 GN=Bin1	SAP18_DROME	0.2333	1	4	29	1.6	0.678072	0.282012	0.549732
Q9VEZ3	LP04448p GN=msps	Q9VEZ3_DROME	0.1548	2	29	127	1.23457	0.304006	0.344723	0.462529
Q9VF03	Brahma associated protein 155 kDa GN=mor	Q9VF03_DROME	0.2994	1	29	255	1.24074	0.311202	0.230433	0.637455
Q9VF08	Mitochondrial import inner membrane translocase subunit Tim16 GN=blp	TIM16_DROME	0.3759	1	5	21	0.25	-2	0.00263153	2.57979
Q9VF27	GM02062p GN=ND23	Q9VF27_DROME	0.3272	1	8	58	3.53333	1.82103	0.000798347	3.09781						3.09781					3.09781
Q9VF51	CG6045 GN=CG6045-RA	Q9VF51_DROME	0.2584	4	26	165	1.2381	0.308122	0.340528	0.467847
Q9VF53	CG18522 GN=CG18522	Q9VF53_DROME	0.0793	1	9	45	0.916667	-0.125531	0.546061	0.262758
Q9VF66	CG31302, isoform E GN=Rbp	Q9VF66_DROME	0.0574	4	8	46	1.58333	0.662965	0.103692	0.984253
Q9VF86	CG6218 GN=CG6218	Q9VF86_DROME	0.273	1	8	28	2	1	0.159931	0.796069
Q9VF87	Cytoplasmic FMR1-interacting protein GN=Sra-1	CYFIP_DROME	0.1541	1	20	108	1.23188	0.300866	0.331393	0.479656
Q9VFC2	GH14439p GN=Spn88Ea	Q9VFC2_DROME	0.2623	1	12	61	1.11905	0.162271	0.633769	0.198069
Q9VFC8-2	Isoform B of Glycogen [starch] synthase GN=GlyS - [GYS_DROME]	GYS_DROME	0.1843	2	13	81	1.2549	0.327575	0.453616	0.343311
Q9VFE6	RRP15-like protein GN=CG3817	RRP15_DROME	0.2536	1	7	39	1.29167	0.369234	0.16249	0.789175
Q9VFE7	CG7262 GN=Nup93-2	Q9VFE7_DROME	0.1294	1	8	22	7	2.80735	0.11584	0.936141
Q9VFE9	CG7265 GN=CG7265	Q9VFE9_DROME	0.2388	1	9	39	2.26667	1.18057	0.099617	1.00167
Q9VFF0	CG3731, isoform A GN=CG3731	Q9VFF0_DROME	0.4404	1	17	136	1.34568	0.428334	0.274128	0.562046						0.562046
Q9VFM9	Twinfilin GN=twf	TWF_DROME	0.2128	1	7	26	1.83333	0.874469	0.152822	0.815813
Q9VFN9	CG9922 GN=CG9922	Q9VFN9_DROME	0.4597	1	6	30	4.66667	2.22239	0.0464199	1.3333
Q9VFQ9	Dipeptidase B, isoform A GN=Dip-B	Q9VFQ9_DROME	0.3937	1	18	153	0.974359	-0.0374747	0.801262	0.0962253
Q9VFR0	Protein BCCIP homolog GN=CG9286	BCCIP_DROME	0.2391	1	6	31	1.38889	0.473931	0.328524	0.483433
Q9VFS5	Serine/threonine-protein phosphatase 4 regulatory subunit 3 GN=flfl	PP4R3_DROME	0.149	2	15	64	1.08889	0.122857	0.760615	0.118835
Q9VFS8	26S proteasome non-ATPase regulatory subunit 9 GN=CG9588	PSMD9_DROME	0.4091	1	8	31	0.958333	-0.0614005	0.920074	0.0361772				0.0361772
Q9VFT4	AT27578p GN=rin	Q9VFT4_DROME	0.358	1	21	289	1.35673	0.440128	0.0288516	1.53983
Q9VFV9	DnaJ-like-2, isoform A GN=Droj2	Q9VFV9_DROME	0.4243	1	14	181	1.21368	0.279382	0.230675	0.636999							0.636999
Q9VFW7	CG32473, isoform A GN=CG32473	Q9VFW7_DROME	0.1739	2	4	93	0.210526	-2.24793	1.91648e-07	6.7175
Q9VFW8	CG8774, isoform B GN=CG8774	Q9VFW8_DROME	0.165	2	14	43	0.0162602	-5.94251	2.12817e-05	4.67199
Q9VFZ4	CG7966 GN=CG7966	Q9VFZ4_DROME	0.142	1	7	29	0.740741	-0.432959	0.383014	0.416786
Q9VG05	CG7518, isoform E GN=CG7518	Q9VG05_DROME	0.1039	3	20	69	1.4359	0.521953	0.0483948	1.3152
Q9VG16	Granny smith, isoform D GN=grsm	Q9VG16_DROME	0.2645	2	11	76	1.35556	0.438884	0.0550413	1.25931
Q9VG23	CG10126, isoform A GN=CG10126	Q9VG23_DROME	0.4512	2	8	30	9.66667	3.27302	0.189808	0.721686
Q9VG32	Malic enzyme GN=Men	Q9VG32_DROME	0.1779	2	14	106	1.875	0.906891	0.00622713	2.20571
Q9VG45	CG6234 GN=Dtg	Q9VG45_DROME	0.2647	1	10	89	0.765432	-0.385654	0.0768719	1.11423
Q9VG69	CG5844 GN=CG5844	Q9VG69_DROME	0.164	1	6	32	1.44444	0.530515	0.373771	0.427395
Q9VG73	Interleukin enhancer-binding factor 2 homolog GN=CG5641	ILF2_DROME	0.2348	1	9	40	1.57143	0.652077	0.329662	0.481931
Q9VG79	Dipeptidase C GN=Dip-C	Q9VG79_DROME	0.224	1	11	76	0.873016	-0.19592	0.373771	0.427395
Q9VG81	CG5167 GN=CG5167	Q9VG81_DROME	0.1299	1	6	27	0.566667	-0.819428	0.0253952	1.59525
Q9VGA3	CG4115 GN=CG4115	Q9VGA3_DROME	0.3045	1	6	38	1.07407	0.103093	0.806961	0.0931476
Q9VGA4	MBD-R2, isoform B GN=MBD-R2	Q9VGA4_DROME	0.1642	2	14	49	1.3	0.378512	0.232779	0.633057
Q9VGE4	CG3532 GN=GCC185	Q9VGE4_DROME	0.1242	1	12	27	0.791667	-0.337035	0.633769	0.198069
Q9VGG9	CG31368, isoform C GN=CG31368	Q9VGG9_DROME	0.1591	2	22	86	1.17544	0.233199	0.670818	0.173395
Q9VGH5	AT27789p GN=glo	Q9VGH5_DROME	0.3686	2	17	193	1.81111	0.856875	0.00909179	2.04135
Q9VGK3	Peptidyl-prolyl cis-trans isomerase GN=CG14715	Q9VGK3_DROME	0.587	1	6	74	3.77778	1.91754	0.039803	1.40008							1.40008														1.40008
Q9VGK7	Putative elongator complex protein 1 GN=Elp1	ELP1_DROME	0.0895	1	10	35	1.61111	0.688056	0.345217	0.461908
Q9VGL0	CG14712 GN=CG14712	Q9VGL0_DROME	0.1295	1	15	74	0.964912	-0.0515303	0.842842	0.0742541
Q9VGM2	CG6783, isoform B GN=fabp	Q9VGM2_DROME	0.5385	3	8	202	1.83871	0.878694	0.0706918	1.15063
Q9VGN9	Probable ribosome biogenesis protein RLP24 GN=RpL24-like	RLP24_DROME	0.356	1	6	51	1.36667	0.450661	0.228597	0.64093
Q9VGP4	LP08082p GN=Ranbp9	Q9VGP4_DROME	0.2024	1	18	71	1.14583	0.196397	0.563728	0.24893
Q9VGP6	Prefoldin subunit 3 GN=mgr	PFD3_DROME	0.2938	1	6	53	3.2	1.67807	0.00663535	2.17814							2.17814
Q9VGP7	Mitochondrial ribosomal protein L40 GN=mRpL40	Q9VGP7_DROME	0.2704	1	5	31	1.73333	0.793549	0.0307908	1.51158											1.51158
Q9VGQ1	CG5214 GN=CG5214	Q9VGQ1_DROME	0.1261	1	6	53	1.13889	0.187627	0.511387	0.29125
Q9VGR7	J domain-containing protein CG6693 GN=CG6693	Y6693_DROME	0.3244	1	9	50	1.18182	0.241008	0.562764	0.249673
Q9VGS2	Translationally-controlled tumor protein homolog GN=Tctp	TCTP_DROME	0.5988	1	8	128	2.33333	1.22239	0.176845	0.752406
Q9VGV8	CG4511, isoform A GN=CG4511	Q9VGV8_DROME	0.3056	1	7	37	1.03704	0.0524674	0.897456	0.0469868
Q9VGW6	DNA replication licensing factor Mcm5 GN=Mcm5	MCM5_DROME	0.2074	1	13	43	2.05556	1.03953	0.0825809	1.08312
Q9VGW7	Arginine methyltransferase 1 GN=Art1	Q9VGW7_DROME	0.4282	1	13	138	1.2	0.263034	0.194586	0.710888
Q9VGW9	LD25118p GN=mRpL37	Q9VGW9_DROME	0.1667	1	6	25	0.857143	-0.222392	0.707259	0.150421
Q9VGX3	Protein anoxia up-regulated GN=fau	FAU_DROME	0.1535	1	7	24	0.282051	-1.82597	0.00207474	2.68304
Q9VGZ3	Iron regulatory protein 1B GN=Irp-1B	Q9VGZ3_DROME	0.2492	1	18	132	1.13333	0.180572	0.28388	0.546865
Q9VH01	BIR-containing ubiquitin-conjugating enzyme GN=Bruce	Q9VH01_DROME	0.0435	1	18	60	1.33333	0.415037	0.207031	0.683964
Q9VH07	RuvB-like helicase 1 GN=pont	RUVB1_DROME	0.3728	1	13	66	1.86667	0.900464	0.189808	0.721686
Q9VH48	Probable histone-arginine methyltransferase CARMER GN=Art4	CARM1_DROME	0.1528	1	8	43	1.25926	0.332575	0.307058	0.51278
Q9VH64	CG8507 GN=CG8507	Q9VH64_DROME	0.3404	1	12	69	1.30952	0.389042	0.0713682	1.1465
Q9VH69	40S ribosomal protein S29 GN=RpS29	RS29_DROME	0.2857	1	2	28	1	0	1	0
Q9VH77	Mannose-6-phosphate isomerase GN=CG8417	Q9VH77_DROME	0.1439	1	6	29	1.04762	0.0671142	0.842842	0.0742541
Q9VH81	GH12714p GN=PpD3	Q9VH81_DROME	0.2442	1	14	90	1.33333	0.415037	0.0529078	1.27648
Q9VH84	Pinin, isoform A GN=Pnn	Q9VH84_DROME	0.3069	2	9	32	1.19048	0.251539	0.488053	0.311533
Q9VH91	CG31352, isoform A GN=Unc-115b	Q9VH91_DROME	0.4342	7	33	211	0.922619	-0.116193	0.23991	0.619951
Q9VH95	Uncharacterized protein CG16817 GN=CG16817	YC17_DROME	0.3913	1	6	90	1.54167	0.624491	0.244075	0.612477
Q9VHA8	LD25575p GN=P58IPK	Q9VHA8_DROME	0.1345	1	7	33	1.5	0.584963	0.232779	0.633057
Q9VHB7	LD22928p GN=MBD-like	Q9VHB7_DROME	0.1888	2	6	36	1.38095	0.465664	0.398041	0.400072
Q9VHC0	LD23870p GN=RnpS1	Q9VHC0_DROME	0.1578	1	5	41	1.03333	0.0473057	0.926248	0.0332726
Q9VHC7	FI21236p1 GN=rump	Q9VHC7_DROME	0.2801	1	16	159	1.32292	0.403722	0.106762	0.971582
Q9VHC8	CG8149 GN=CG8149	Q9VHC8_DROME	0.5	1	14	150	1.27957	0.355659	0.136813	0.863873
Q9VHE5	RH48056p GN=RpL34b	Q9VHE5_DROME	0.3631	2	7	51	1.21212	0.277534	0.589989	0.229156
Q9VHF4	CG33936, isoform A GN=CG45050	Q9VHF4_DROME	0.4322	3	6	28	1.22222	0.289507	0.419753	0.377006
Q9VHG5	CG8436 GN=Ibf1	Q9VHG5_DROME	0.4463	1	9	51	0.974359	-0.0374747	0.889194	0.0510034
Q9VHG6	CG9740 GN=Ibf2	Q9VHG6_DROME	0.3282	1	5	31	0.958333	-0.0614005	0.90095	0.0452995
Q9VHH8	CG18005 GN=beag	Q9VHH8_DROME	0.246	1	12	50	0.948718	-0.0759489	0.724605	0.139899
Q9VHI1	Hyrax GN=hyx	Q9VHI1_DROME	0.21	1	13	43	0.969697	-0.0443941	0.918272	0.0370286
Q9VHI7	CG11982 GN=CG11982	Q9VHI7_DROME	0.2868	1	8	70	1.22222	0.289507	0.114364	0.941712
Q9VHI8	CG11980, isoform A GN=CG11980	Q9VHI8_DROME	0.287	3	9	40	13	3.70044	0.00858273	2.06637
Q9VHJ8	SkpA associated protein, isoform A GN=skap	Q9VHJ8_DROME	0.259	2	12	89	0.956522	-0.0641303	0.724605	0.139899
Q9VHK1	Polychaetoid, isoform J GN=pyd	Q9VHK1_DROME	0.1268	6	3	67	1.0625	0.0874628	0.697261	0.156605
Q9VHK3	Polychaetoid, isoform A GN=pyd	Q9VHK3_DROME	0.1072	6	4	67	1.15556	0.208587	0.257663	0.588948
Q9VHL2	LD47396p GN=Tcp-1eta	Q9VHL2_DROME	0.5368	1	25	273	1.38365	0.468477	0.110577	0.956334							0.956334
Q9VHM3	CG9797 GN=M1BP	Q9VHM3_DROME	0.2344	1	9	29	1.04762	0.0671142	0.842842	0.0742541
Q9VHN7	CG8036, isoform B GN=CG8036	Q9VHN7_DROME	0.2875	3	18	170	1.11966	0.163058	0.383014	0.416786
Q9VHP0	ATP-dependent RNA helicase bel GN=bel	DDX3_DROME	0.4085	2	22	255	1.47518	0.560888	0.000285878	3.54382
Q9VHR5	CG9684 GN=CG9684	Q9VHR5_DROME	0.1542	1	8	25	0.857143	-0.222392	0.845705	0.0727809
Q9VHR8-2	Isoform 2 of Dipeptidyl peptidase 3 GN=DppIII - [DPP3_DROME]	DPP3_DROME	0.3873	2	26	220	0.97619	-0.0347654	0.771524	0.11265
Q9VHS8	FI20117p1 GN=eIF4AIII	Q9VHS8_DROME	0.2707	1	11	73	2.37037	1.24511	0.0313999	1.50307													1.50307
Q9VHX2	CG3223 GN=CG3223	Q9VHX2_DROME	0.0988	1	4	33	0.888889	-0.169925	0.625301	0.203911
Q9VHX4	CG2767, isoform A GN=CG2767	Q9VHX4_DROME	0.459	2	14	105	1.125	0.169925	0.151454	0.819719
Q9VHX9	CD98 heavy chain GN=CD98hc	Q9VHX9_DROME	0.2035	1	10	47	0.645833	-0.630766	0.199881	0.699229
Q9VI10	Probable small nuclear ribonucleoprotein Sm D2 GN=SmD2	SMD2_DROME	0.6303	1	7	110	1.59649	0.674905	0.0228908	1.64034
Q9VI14	CG33097, isoform A GN=CG15187	Q9VI14_DROME	0.2084	2	16	83	0.984127	-0.0230836	0.943527	0.0252459
Q9VI56	CG1943, isoform A GN=CG1943	Q9VI56_DROME	0.5169	1	5	33	1.5	0.584963	0.103437	0.985323
Q9VI58	CG1091, isoform B GN=CG1091	Q9VI58_DROME	0.1375	2	7	20	1.88889	0.917538	0.526049	0.278974
Q9VI64	CG10098 GN=CG10098	Q9VI64_DROME	0.3116	1	9	85	1.08333	0.115477	0.603645	0.219218
Q9VI75	Phosphatidylinositol-binding clathrin assembly protein LAP GN=lap	PICAL_DROME	0.3141	1	1	111	1.03704	0.0524674	0.795028	0.0996178
Q9VID9	CG8677, isoform B GN=CG8677	Q9VID9_DROME	0.1934	1	41	171	1.02381	0.0339473	0.876457	0.0572695
Q9VIE7	Burgundy, isoform B GN=bur	Q9VIE7_DROME	0.2035	1	13	36	2.66667	1.41504	0.0735612	1.13335
Q9VIE8	Aconitase, isoform B GN=Acon	Q9VIE8_DROME	0.3888	2	27	306	1.14493	0.195256	0.352922	0.452321
Q9VIF2	CG9248, isoform A GN=CG9248	Q9VIF2_DROME	0.1073	1	5	26	0.62963	-0.667425	0.0337978	1.47111
Q9VIG1	CG12050 GN=CG12050-RB	Q9VIG1_DROME	0.0887	1	9	29	0.740741	-0.432959	0.383014	0.416786
Q9VIH1	CG9273 protein GN=RPA2	Q9VIH1_DROME	0.3415	1	8	84	1.31373	0.393664	0.08708	1.06008
Q9VIH9	CG9338, isoform B GN=CG9338	Q9VIH9_DROME	0.4218	1	5	38	0.722222	-0.469485	0.114364	0.941712
Q9VIK6	Centrocortin, isoform A GN=Cen	Q9VIK6_DROME	0.2797	1	21	102	1.02667	0.0379679	0.849074	0.0710542
Q9VIL2	CG2608 GN=CG2608	Q9VIL2_DROME	0.3961	1	6	29	0.740741	-0.432959	0.197473	0.704492
Q9VIP9	Condensin complex subunit 2 GN=barr	Q9VIP9_DROME	0.2	1	12	52	0.822222	-0.2824	0.526049	0.278974
Q9VIU9	CG10186, isoform C GN=CG10186	Q9VIU9_DROME	0.101	4	10	29	1.6	0.678072	0.484507	0.3147
Q9VIV2	LD45403p GN=swm	Q9VIV2_DROME	0.2072	2	18	68	1.28571	0.36257	0.474937	0.323364
Q9VIW7	tRNA-splicing ligase RtcB homolog GN=CG9987	RTCB_DROME	0.1126	1	5	33	0.888889	-0.169925	0.724605	0.139899
Q9VIX3	Paxillin, isoform B GN=Pax	Q9VIX3_DROME	0.2338	6	8	48	1.66667	0.736966	0.0709877	1.14882
Q9VIX7	CG15825-PB, isoform B GN=fon	Q9VIX7_DROME	0.2028	3	9	34	0.333333	-1.58496	0.028804	1.54055
Q9VJ12	Acinus, isoform A GN=Acn	Q9VJ12_DROME	0.387	1	23	191	1.05072	0.0713846	0.678993	0.168134
Q9VJ19	CG10652-PA, isoform A GN=RpL30	Q9VJ19_DROME	0.6036	1	6	99	2.96667	1.56884	0.039617	1.40212
Q9VJ26	EF-hand domain-containing protein D2 homolog GN=Swip-1	EFHD2_DROME	0.5161	1	8	67	1.38462	0.469485	0.025889	1.58688
Q9VJ30	Numb-associated kinase, isoform A GN=Nak	Q9VJ30_DROME	0.0712	3	9	29	1.04762	0.0671142	0.889194	0.0510034
Q9VJ39	Leukotriene A(4) hydrolase GN=CG10602	Q9VJ39_DROME	0.137	1	8	25	1.05556	0.0780025	0.90095	0.0452995
Q9VJ43	LD10783p GN=ScpX	Q9VJ43_DROME	0.2169	1	3	47	1.23333	0.302563	0.42636	0.370224
Q9VJ44	CG17597, isoform B GN=CG17597	Q9VJ44_DROME	0.258	1	2	51	0.974359	-0.0374747	0.806961	0.0931476
Q9VJ58	Fas-associated factor, isoform A GN=Faf	Q9VJ58_DROME	0.1552	1	7	31	1.38889	0.473931	0.16249	0.789175
Q9VJ60	CG10343-PA GN=CG10343	Q9VJ60_DROME	0.5234	1	8	35	1.33333	0.415037	0.307058	0.51278
Q9VJ74	CG10333 GN=CG10333	Q9VJ74_DROME	0.1655	1	14	68	0.746032	-0.422691	0.176845	0.752406
Q9VJ86	Bicoid stability factor GN=bsf	Q9VJ86_DROME	0.2365	1	30	233	1.13208	0.17897	0.150053	0.823755
Q9VJ87	Pre-mRNA-splicing factor CWC22 homolog GN=ncm	CWC22_DROME	0.0564	1	6	29	0.740741	-0.432959	0.124058	0.906376
Q9VJD1	CG6453, isoform A GN=CG6453	Q9VJD1_DROME	0.3285	1	18	129	1.14943	0.200913	0.0592526	1.22729
Q9VJD4	LD24721p GN=Sgt	Q9VJD4_DROME	0.2719	1	9	97	1.36842	0.452512	0.174538	0.758111
Q9VJE3	CG15141 GN=CG15141	Q9VJE3_DROME	0.4431	1	15	103	1.47368	0.559427	0.168835	0.772538
Q9VJG0	Aminopeptidase P GN=ApepP	Q9VJG0_DROME	0.2072	1	12	54	1.30303	0.381871	0.188027	0.72578
Q9VJG2	CG12288 GN=CG12288	Q9VJG2_DROME	0.1218	1	6	27	0.566667	-0.819428	0.0253952	1.59525
Q9VJH2	CG31739, isoform A GN=mdy	Q9VJH2_DROME	0.2421	1	21	123	1.18519	0.245112	0.283209	0.547893
Q9VJI7	CG13277-PA GN=LSm7	Q9VJI7_DROME	0.2727	1	4	30	0.916667	-0.125531	0.793375	0.100521
Q9VJI9	Cytosolic Fe-S cluster assembly factor NUBP1 homolog GN=CG17904	NUBP1_DROME	0.3344	1	8	41	1.375	0.459432	0.500894	0.300254
Q9VJJ0	Proteasome subunit beta type GN=Prosbeta4	Q9VJJ0_DROME	0.3483	1	7	45	2.66667	1.41504	0.0367726	1.43448				1.43448
Q9VJU6	IP09831p GN=NimB5	Q9VJU6_DROME	0.4413	1	11	45	1.80952	0.85561	0.104907	0.979194
Q9VJY6	60S ribosomal protein L24 GN=RpL24	RL24_DROME	0.3935	1	8	69	1.4359	0.521953	0.104907	0.979194
Q9VJZ4	AT12494p GN=CG9306	Q9VJZ4_DROME	0.3333	1	5	33	1.86667	0.900464	0.0160063	1.79571						1.79571					1.79571
Q9VJZ5	LD07294p GN=Tap42	Q9VJZ5_DROME	0.3263	1	10	96	1	0	1	0
Q9VJZ6	CG6523-PA GN=CG6523	Q9VJZ6_DROME	0.4398	1	8	73	2.1	1.07039	0.00414467	2.38251
Q9VJZ7	Ribosomal RNA processing protein 1 homolog GN=Nnp-1	RRP1L_DROME	0.2038	1	11	34	0.611111	-0.710493	0.180416	0.743726
Q9VK18	CG16812 GN=CG16812	Q9VK18_DROME	0.1692	1	8	31	0.7	-0.514573	0.26657	0.574189
Q9VK44	CG9934, isoform A GN=CG9934	Q9VK44_DROME	0.0978	1	13	61	0.862745	-0.212994	0.482152	0.316816
Q9VK45	Target of rapamycin GN=Tor	TOR_DROME	0.0733	2	18	51	0.8	-0.321928	0.533808	0.272615
Q9VK58	Pih1D1, isoform D GN=Pih1D1	Q9VK58_DROME	0.213	1	18	83	0.984127	-0.0230836	0.927581	0.0326484
Q9VK59	CG5787, isoform A GN=CG5787	Q9VK59_DROME	0.3611	1	34	238	1.08333	0.115477	0.574823	0.240466
Q9VK60	CG6180 GN=CG6180	Q9VK60_DROME	0.2918	1	8	66	1.86667	0.900464	0.0592526	1.22729
Q9VK69	T-complex protein 1 subunit delta GN=CG5525	Q9VK69_DROME	0.2871	1	15	91	1.5625	0.643856	0.103437	0.985323							0.985323
Q9VK85	Ef1alpha-like factor, isoform A GN=Elf	Q9VK85_DROME	0.2585	2	14	101	1.35	0.432959	0.0371749	1.42975
Q9VKB2	CG5336-PA GN=Ced-12	Q9VKB2_DROME	0.1727	1	11	36	1.16667	0.222392	0.627766	0.202202
Q9VKC9	Dietary and metabolic glutamate transporter GN=dmGlut	Q9VKC9_DROME	0.0927	1	6	18	0.0196078	-5.67243	6.33837e-07	6.19802
Q9VKD3	Probable cysteine desulfurase, mitochondrial GN=CG12264	NFS1_DROME	0.1775	1	8	36	1.38095	0.465664	0.279658	0.553372					0.553372
Q9VKD8	CG6686-PB, isoform B GN=CG6686	Q9VKD8_DROME	0.1722	2	14	70	0.833333	-0.263034	0.340528	0.467847
Q9VKI8	CG6287-PA GN=CG6287	Q9VKI8_DROME	0.491	1	14	102	2.75758	1.4634	0.0906485	1.04264					1.04264
Q9VKJ1	MPN domain-containing protein CG4751 GN=CG4751	MPND_DROME	0.148	1	19	97	1.07246	0.100929	0.575462	0.239984
Q9VKJ3	Nuclear pore complex protein Nup160 homolog GN=Nup160	NU160_DROME	0.1006	1	12	40	1.57143	0.652077	0.159931	0.796069			0.796069
Q9VKK1	Enhancer of mRNA-decapping protein 4 homolog GN=Ge-1	EDC4_DROME	0.2038	1	29	103	1.22727	0.295456	0.375818	0.425023
Q9VKM2	SCAR GN=SCAR	Q9VKM2_DROME	0.0995	6	5	23	2.22222	1.152	0.302943	0.51864
Q9VKQ9	Protein dpy-30 homolog GN=Dpy-30L1	DPY30_DROME	0.3731	1	3	49	1.15152	0.203533	0.5265	0.278602
Q9VKV1	Alpha-mannosidase GN=LM408	Q9VKV1_DROME	0.1398	2	14	75	1.13725	0.185556	0.531712	0.274324
Q9VKW5	CG5355 GN=CG5355	Q9VKW5_DROME	0.4048	1	28	202	1.53704	0.620152	0.00205279	2.68765
Q9VKW8	CG17768, isoform B GN=LSm-4-RB	Q9VKW8_DROME	0.4805	1	8	56	1.22222	0.289507	0.279658	0.553372
Q9VKX2	Malate dehydrogenase GN=Mdh1	Q9VKX2_DROME	0.3709	1	12	79	1.69231	0.758992	0.0668475	1.17491
Q9VKY2	Cullin-associated NEDD8-dissociated protein 1 GN=Cand1	CAND1_DROME	0.2524	1	31	128	1.37333	0.457682	0.240145	0.619526
Q9VKZ8	Ubiquitin carboxyl-terminal hydrolase GN=CG5384	Q9VKZ8_DROME	0.2674	1	11	63	1.76667	0.82103	0.00827232	2.08237
Q9VL18	Probable elongation factor 1-delta GN=eEF1delta	EF1D_DROME	0.6719	2	19	199	1.50926	0.593841	0.0014891	2.82708
Q9VL68	CG4598, isoform B GN=CG4598	Q9VL68_DROME	0.2135	1	6	34	0.925926	-0.111031	0.75454	0.122318
Q9VL70	CG4600-PA GN=yip2	Q9VL70_DROME	0.3668	1	12	101	1.4386	0.524662	0.0620679	1.20713
Q9VL71	LD29830p GN=Srp54	Q9VL71_DROME	0.1988	1	10	61	1.02222	0.0317089	0.889194	0.0510034
Q9VL72	SWI/SNF-related matrix-associated actin-dependent regulator of chromatin subfamily A containing DEAD/H box 1 homolog GN=Etl1	SMRCD_DROME	0.1469	3	10	39	1.11111	0.152003	0.686164	0.163572
Q9VL78	FK506-binding protein 59 GN=FKBP59	FKB59_DROME	0.6128	1	28	348	1.25571	0.328501	0.0220196	1.65719							1.65719														1.65719
Q9VL89	Methionine aminopeptidase 2 GN=und	Q9VL89_DROME	0.3036	1	11	79	1.42222	0.508147	0.0145981	1.83571
Q9VL91	LD23102p GN=zf30C	Q9VL91_DROME	0.2227	1	16	59	0.977778	-0.0324215	0.878548	0.0562346
Q9VL96	Pescadillo homolog GN=CG4364	PESC_DROME	0.0718	1	5	27	0.952381	-0.0703893	0.864094	0.0634389
Q9VLB7	GDP dissociation inhibitor, isoform A GN=Gdi	Q9VLB7_DROME	0.3544	1	15	191	1.59596	0.674424	0.0058206	2.23503															2.23503
Q9VLC5	Aldehyde dehydrogenase GN=Aldh	Q9VLC5_DROME	0.3635	1	19	222	1.24113	0.31166	0.241705	0.616715
Q9VLK1	CG13097 GN=CG13097	Q9VLK1_DROME	0.219	1	12	52	1.24242	0.313158	0.0709877	1.14882
Q9VLK2	Ribosomal L1 domain-containing protein CG13096 GN=CG13096	Y3096_DROME	0.2247	1	15	49	0.755556	-0.40439	0.189686	0.721966
Q9VLL3	A kinase anchor protein 200, isoform A GN=Akap200	Q9VLL3_DROME	0.2855	1	1	368	1.1626	0.217357	0.471985	0.326072
Q9VLL5	CG13397, isoform A GN=ESTS:172F5T	Q9VLL5_DROME	0.1015	1	8	26	1.4	0.485427	0.329662	0.481931
Q9VLM8	Alanine--tRNA ligase, cytoplasmic GN=Aats-ala	SYAC_DROME	0.294	1	24	181	1.13821	0.186769	0.499283	0.301654
Q9VLP2	CG7781, isoform B GN=CG7781	Q9VLP2_DROME	0.2177	1	3	73	1.01852	0.0264722	0.871929	0.059519
Q9VLQ9	LD22082p GN=Snx6	Q9VLQ9_DROME	0.3073	2	14	60	1.20513	0.269187	0.346422	0.460394
Q9VLR5	RNA polymerase II transcriptional coactivator GN=Ssb-c31a	TCP4_DROME	0.3273	1	3	35	2.58333	1.36923	0.376179	0.424606
Q9VLS4	CG8498, isoform B GN=CG8498	Q9VLS4_DROME	0.4111	1	3	33	2.41667	1.27302	0.028804	1.54055
Q9VLS9	Beta-lactamase-like protein 2 homolog GN=CG12375	LACB2_DROME	0.1541	1	4	36	1	0	1	0
Q9VLT5	Protein purity of essence GN=poe	POE_DROME	0.125	2	60	252	1.11494	0.156969	0.648708	0.187951
Q9VLT7	CG7424-PA GN=RpL36A	Q9VLT7_DROME	0.1442	1	2	35	0.962963	-0.0544478	0.878548	0.0562346
Q9VLU0	Barrier-to-autointegration factor GN=baf	BAF_DROME	0.4444	1	4	22	7	2.80735	0.0908442	1.0417
Q9VLV9	Proctolin GN=Proc	Q9VLV9_DROME	0.3929	1	4	39	1.52381	0.607683	0.393639	0.404902
Q9VLY9	Thioester-containing protein 2, isoform B GN=Tep2	Q9VLY9_DROME	0.0593	5	7	25	1.75	0.807355	0.151454	0.819719
Q9VM14	Acetyltransferase component of pyruvate dehydrogenase complex GN=CG5261	Q9VM14_DROME	0.3418	5	19	167	1.13158	0.178337	0.409238	0.388025
Q9VM69	CG10206-PA GN=nop5	Q9VM69_DROME	0.2994	1	12	88	1.13333	0.180572	0.439315	0.357224
Q9VM71	5'-3' exoribonuclease 2 homolog GN=Rat1	XRN2_DROME	0.2203	1	16	91	0.985507	-0.0210616	0.939432	0.0271346
Q9VM93	LD33094p GN=Liprin-alpha	Q9VM93_DROME	0.154	4	16	91	1.11111	0.152003	0.438935	0.3576
Q9VM95	Protein Aatf GN=Aatf	AATF_DROME	0.1865	1	8	41	1.61905	0.695145	0.107718	0.96771
Q9VMB9	CG11015-PA GN=CoVb	Q9VMB9_DROME	0.3833	1	4	131	2.23529	1.16046	0.0184455	1.73411						1.73411					1.73411
Q9VMC7	CG31638, isoform A GN=CG9545	Q9VMC7_DROME	0.2813	2	18	59	0.895833	-0.158698	0.603645	0.219218
Q9VMC8	Uncharacterized protein CG9548 GN=CG9548	PHF5_DROME	0.5315	1	6	32	1.19048	0.251539	0.536963	0.270055
Q9VMD9	Tiggrin GN=Tig	TIG_DROME	0.0763	1	16	23	0.0151515	-6.04439	3.47159e-05	4.45947
Q9VMH8	CG13993, isoform B GN=CG13993	Q9VMH8_DROME	0.5238	1	8	53	1.62963	0.704544	0.0483948	1.3152							1.3152
Q9VMI5	CG9135 protein GN=CG9135	Q9VMI5_DROME	0.154	1	7	51	1.21212	0.277534	0.412918	0.384136
Q9VMJ7	Lysine-specific demethylase lid GN=lid	KDM5_DROME	0.1643	1	22	109	0.964286	-0.0524674	0.791682	0.101449
Q9VMM3	CG7239 GN=CG7239	Q9VMM3_DROME	0.1155	1	5	26	1.11111	0.152003	0.793375	0.100521
Q9VMN5	60 kDa heat shock protein homolog 2, mitochondrial GN=Hsp60C	CH60C_DROME	0.1563	1	1	128	1.24691	0.318361	0.219944	0.657688							0.657688
Q9VMQ9	CG11024-PA GN=cl	Q9VMQ9_DROME	0.6032	1	8	52	1.4	0.485427	0.106558	0.972413
Q9VMR6	CG12512 GN=CG12512-RA	Q9VMR6_DROME	0.1804	1	9	30	1.33333	0.415037	0.659743	0.180626																						0.180626
Q9VMU0	CG8680, isoform A GN=CG8680	Q9VMU0_DROME	0.3333	1	4	41	1.375	0.459432	0.38908	0.409961
Q9VMU4	60S ribosomal protein L37a GN=RpL37A	RL37A_DROME	0.2935	1	5	49	1.15152	0.203533	0.575462	0.239984
Q9VMV5	Viking, isoform A GN=vkg	Q9VMV5_DROME	0.1526	1	24	159	0.648148	-0.625604	0.00801686	2.096
Q9VMV9	Reticulon-like protein GN=Rtnl1	Q9VMV9_DROME	0.3294	5	10	130	1.06452	0.0901978	0.643762	0.191275
Q9VMW7	Inosine triphosphate pyrophosphatase GN=CG8891	ITPA_DROME	0.3351	1	5	26	0.75	-0.415037	0.26657	0.574189
Q9VMW9	GDP-mannose 4,6 dehydratase GN=Gmd	GMDS_DROME	0.3241	1	11	34	2.5	1.32193	0.0654412	1.18415
Q9VMY1	Probable 39S ribosomal protein L24, mitochondrial GN=mRpL24	RM24_DROME	0.4494	1	12	40	1.88889	0.917538	0.163063	0.787645											0.787645
Q9VN02	CG9779 GN=Vps24	Q9VN02_DROME	0.3812	1	8	53	1.27273	0.347923	0.415646	0.381276
Q9VN21	Growl, isoform A GN=lost	Q9VN21_DROME	0.5229	2	24	351	1.14768	0.19872	0.255481	0.592641
Q9VN25	Eukaryotic translation initiation factor 3 subunit A GN=eIF3-S10	EIF3A_DROME	0.3596	2	45	299	0.961039	-0.0573332	0.841516	0.0749374													0.0749374
Q9VN39	CG9775, isoform A GN=CG9775	Q9VN39_DROME	0.2589	2	10	67	0.980392	-0.0285692	0.952132	0.0213026
Q9VN44	FI07923p GN=Karybeta3	Q9VN44_DROME	0.2733	1	25	172	1.51613	0.600393	0.0197807	1.70376			1.70376
Q9VN50	Eukaryotic translation initiation factor 3 subunit F-1 GN=eIF3-S5-1	EI3F1_DROME	0.2286	1	6	39	1.11111	0.152003	0.659743	0.180626													0.180626
Q9VN55	Antimeros GN=atms	Q9VN55_DROME	0.2528	1	11	60	1.48485	0.570316	0.0254739	1.5939
Q9VN58	CG42574 GN=ctrip	Q9VN58_DROME	0.049	1	12	33	1.86667	0.900464	0.331302	0.479777
Q9VN86	AT14148p GN=CG2604	Q9VN86_DROME	0.1465	1	6	25	0.857143	-0.222392	0.659743	0.180626
Q9VN93-2	Isoform B of Putative cysteine proteinase CG12163 GN=CG12163 - [CPR1_DROME]	CPR1_DROME	0.1979	2	8	37	1.03704	0.0524674	0.842842	0.0742541
Q9VN95	Enolase-phosphatase E1 GN=CG12173	ENOPH_DROME	0.2734	1	6	32	2.33333	1.22239	0.0709877	1.14882					1.14882
Q9VNA3	CG11999 GN=CG11999	Q9VNA3_DROME	0.4306	1	9	53	1.13889	0.187627	0.603645	0.219218
Q9VNA5	Proteasome subunit beta type-4 GN=Prosbeta7	PSB4_DROME	0.194	1	5	31	1.38889	0.473931	0.366297	0.436167				0.436167
Q9VNB9	RE17737p GN=RpL35A	Q9VNB9_DROME	0.4013	1	9	131	0.87963	-0.185032	0.348308	0.458037
Q9VNC4	CG31550, isoform B GN=CG31550	Q9VNC4_DROME	0.1767	3	12	33	1.04167	0.0588937	0.916343	0.0379421
Q9VND7	CG2931 GN=CG2931	Q9VND7_DROME	0.2715	1	7	33	1.86667	0.900464	0.08356	1.078
Q9VNE0	CG2926 GN=CG2926	Q9VNE0_DROME	0.071	1	10	47	1.09091	0.125531	0.707259	0.150421
Q9VNE2	Protein krasavietz GN=kra	PKRA_DROME	0.3389	1	17	118	1.24	0.31034	0.47868	0.319955
Q9VNE9	60S ribosomal protein L13a GN=RpL13A	RL13A_DROME	0.239	1	7	91	1.04545	0.0641303	0.91403	0.0390397
Q9VNF6	MTA1-like, isoform A GN=MTA1-like	Q9VNF6_DROME	0.3136	3	19	125	1.26923	0.343954	0.208374	0.681157
Q9VNF8	Sec23, isoform A GN=Sec23	Q9VNF8_DROME	0.1397	1	10	43	1.71429	0.777608	0.195397	0.709082
Q9VNH5	CG2091 GN=CG2091	Q9VNH5_DROME	0.3824	1	14	77	1.5	0.584963	0.178467	0.748442
Q9VNH7	CG2082, isoform A GN=CG2082	Q9VNH7_DROME	0.2219	9	7	26	1.4	0.485427	0.184281	0.73452
Q9VNI3	UPF0609 protein CG1218 GN=CG1218	U609_DROME	0.2428	1	10	42	1.22222	0.289507	0.26657	0.574189
Q9VNI8	Hpr1 GN=Hpr1	Q9VNI8_DROME	0.1355	1	8	36	0.757576	-0.400538	0.133975	0.872978
Q9VNL0	Gasp, isoform A GN=Gasp	Q9VNL0_DROME	0.3992	2	8	67	1.2619	0.335603	0.312016	0.505823
Q9VNR6	Lethal (3) 04053 GN=l(3)04053	Q9VNR6_DROME	0.1402	1	5	26	1.4	0.485427	0.0781407	1.10712
Q9VNV3	ATP-dependent RNA helicase Ddx1 GN=Ddx1	DDX1_DROME	0.1857	1	13	49	1.70833	0.77259	0.00830141	2.08085
Q9VNX4	Delta-1-Pyrroline-5-carboxylate dehydrogenase 1, isoform A GN=P5CDh1	Q9VNX4_DROME	0.5017	1	27	314	1.20588	0.270089	0.0549341	1.26016					1.26016
Q9VNX6	LD06749p GN=Nopp140	Q9VNX6_DROME	0.1972	1	4	82	1.10526	0.14439	0.527299	0.277943
Q9VNX8	Eukaryotic translation initiation factor 2A GN=CG7414	EIF2A_DROME	0.2868	2	14	63	1.57576	0.656046	0.242985	0.614421
Q9VP05	Mediator of RNA polymerase II transcription subunit 1 GN=MED1	MED1_DROME	0.1119	3	10	37	0.787879	-0.343954	0.307058	0.51278
Q9VP22	Cyclin-dependent kinase 12 GN=Cdk12	CDK12_DROME	0.0968	6	9	28	1	0	1	0
Q9VP47	Pre-rRNA-processing protein TSR1 homolog GN=CG7338	TSR1_DROME	0.1179	1	9	27	1.16667	0.222392	0.791682	0.101449
Q9VP57	CG7752-PA GN=pzg	Q9VP57_DROME	0.3554	1	29	321	1.2402	0.310568	0.0488259	1.31135
Q9VP77	CG10565, isoform A GN=CG10565	Q9VP77_DROME	0.2152	1	12	58	1.04762	0.0671142	0.724605	0.139899							0.139899
Q9VPC0	Serine/threonine-protein kinase PITSLRE GN=Pitslre	KP58_DROME	0.0798	2	8	36	1	0	1	0
Q9VPI9	LD20667p GN=Zir	Q9VPI9_DROME	0.0838	1	15	37	0.787879	-0.343954	0.644111	0.191039
Q9VPL0	CG3436, isoform A GN=CG3436	Q9VPL0_DROME	0.2651	1	9	67	1.2619	0.335603	0.203195	0.692088
Q9VPM5	LD01582p GN=mbm	Q9VPM5_DROME	0.0742	1	4	25	0.708333	-0.4975	0.16249	0.789175
Q9VPM7	CG17078, isoform B GN=CG17078-RA	Q9VPM7_DROME	0.2197	3	14	80	1.14815	0.199309	0.501705	0.299551
Q9VPN5	CG2720-PA GN=Hop	Q9VPN5_DROME	0.5041	1	27	404	1.28916	0.366428	0.136935	0.863485							0.863485
Q9VPQ2	CG4164 GN=CG4164	Q9VPQ2_DROME	0.2881	1	8	32	3.22222	1.68806	0.0249432	1.60305							1.60305
Q9VPR5	CG2807, isoform A GN=CG2807	Q9VPR5_DROME	0.1925	1	23	122	1.02222	0.0317089	0.921762	0.0353813
Q9VPU1	Dreadlocks, isoform B GN=dock	Q9VPU1_DROME	0.2573	2	15	95	1.25	0.321928	0.375818	0.425023
Q9VPX2	Major facilitator superfamily transporter 3 GN=MFS3	Q9VPX2_DROME	0.0742	1	4	31	0.814815	-0.295456	0.248831	0.604096
Q9VPX7	Adenylyl cyclase-associated protein GN=capt	Q9VPX7_DROME	0.4269	2	15	151	1.46429	0.550197	0.0132326	1.87835
Q9VPY2	Phospholipase A2 activator protein, isoform A GN=Plap	Q9VPY2_DROME	0.2859	1	21	116	1.04762	0.0671142	0.829785	0.0810343
Q9VPY7	CG5126 GN=CG5126	Q9VPY7_DROME	0.211	1	9	33	3.33333	1.73697	0.0176787	1.75255
Q9VQ29	Cytochrome b-c1 complex subunit Rieske, mitochondrial GN=RFeSP	Q9VQ29_DROME	0.1435	1	4	26	1.83333	0.874469	0.114364	0.941712
Q9VQ58	CG15356 GN=CG15356-RA	Q9VQ58_DROME	0.1056	1	8	32	1.19048	0.251539	0.693239	0.159117
Q9VQ61	Aspartate aminotransferase GN=Got2	Q9VQ61_DROME	0.2075	2	8	39	2.26667	1.18057	0.0768719	1.11423
Q9VQ76	LD36155p GN=tho2	Q9VQ76_DROME	0.1469	3	20	64	1.08889	0.122857	0.851925	0.0695986
Q9VQ94	LP05220p GN=Sec24CD	Q9VQ94_DROME	0.1165	2	11	41	1.375	0.459432	0.439085	0.357452
Q9VQE0	Dynamin related protein 1, isoform A GN=Drp1	Q9VQE0_DROME	0.2776	1	19	104	1.4	0.485427	0.0184335	1.73439
Q9VQF5	Cwc25 GN=Cwc25	Q9VQF5_DROME	0.1344	1	6	28	0.833333	-0.263034	0.419753	0.377006
Q9VQF7	Bacchus, isoform B GN=Bacc	Q9VQF7_DROME	0.4079	1	6	349	0.945055	-0.0815299	0.552968	0.2573
Q9VQI7	CG3083-PA GN=Prx6005	Q9VQI7_DROME	0.473	1	10	80	1.57143	0.652077	0.00271368	2.56644														2.56644
Q9VQJ8	AT11165p GN=CG9643	Q9VQJ8_DROME	0.4064	1	7	26	8.33333	3.05889	0.0170879	1.76731
Q9VQK5	CG3542 GN=CG3542	Q9VQK5_DROME	0.1278	1	10	54	1.16667	0.222392	0.481618	0.317297
Q9VQK7	CG3605, isoform A GN=CG3605	Q9VQK7_DROME	0.2951	1	20	126	1.22222	0.289507	0.0529078	1.27648
Q9VQL1	CG17259, isoform A GN=CG17259	Q9VQL1_DROME	0.3214	1	14	108	1.23188	0.300866	0.0709877	1.14882
Q9VQQ0	Serine/threonine-protein phosphatase 2A activator GN=Ptpa	Q9VQQ0_DROME	0.1231	1	5	28	0.703704	-0.50696	0.0709877	1.14882
Q9VQQ6	FI18122p1 GN=Snx1	Q9VQQ6_DROME	0.1987	2	7	38	1.77778	0.830075	0.0618347	1.20877
Q9VQR8	CG33123, isoform A GN=CG33123	Q9VQR8_DROME	0.1709	1	20	96	1.26667	0.341037	0.33903	0.469762
Q9VR53	LD15927p GN=wap	Q9VR53_DROME	0.2828	1	9	46	1.2	0.263034	0.506021	0.295831
Q9VRD4	CG1532, isoform B GN=CG1532	Q9VRD4_DROME	0.2986	1	6	42	1.06667	0.0931094	0.776448	0.109888
Q9VRD9	Cystathionine beta-synthase GN=Cbs	Q9VRD9_DROME	0.2969	1	13	64	1.8	0.847997	0.00271368	2.56644					2.56644
Q9VRG8	CG1486, isoform A GN=CG1486	Q9VRG8_DROME	0.1056	1	8	33	1.2381	0.308122	0.575462	0.239984
Q9VRJ4	CG10672 GN=CG10672	Q9VRJ4_DROME	0.2524	1	8	31	1.73333	0.793549	0.097004	1.01321
Q9VRJ5	Charged multivesicular body protein 2b GN=CHMP2B	Q9VRJ5_DROME	0.25	1	4	33	1.04167	0.0588937	0.85462	0.0682269
Q9VRJ9	Ubiquitin thioesterase OTU1 GN=CG4603	OTU1_DROME	0.2939	2	7	28	1.22222	0.289507	0.574154	0.240972
Q9VRL1	CG10640-PA, isoform A GN=Uev1A	Q9VRL1_DROME	0.4897	2	7	43	2.05556	1.03953	0.0186847	1.72851
Q9VRP2	CG10576, isoform A GN=CG10576	Q9VRP2_DROME	0.3095	1	12	137	1.65217	0.724366	0.0194122	1.71192
Q9VRP3	AT08565p GN=Txl	Q9VRP3_DROME	0.223	1	6	63	1.16667	0.222392	0.538675	0.268673
Q9VRP9	E3 ubiquitin-protein ligase Bre1 GN=Bre1	BRE1_DROME	0.272	1	25	121	1.10714	0.146841	0.38908	0.409961
Q9VRS6	Jonah 65Aiv GN=Jon65Aiv	Q9VRS6_DROME	0.1808	3	4	12	0.030303	-5.04439	8.79642e-06	5.05569
Q9VRV4	D19B GN=D19B	Q9VRV4_DROME	0.146	1	8	38	1.07407	0.103093	0.724605	0.139899
Q9VRV5	D19A GN=D19A	Q9VRV5_DROME	0.1266	1	8	28	1.22222	0.289507	0.536963	0.270055
Q9VRY4	LD13895p GN=velo	Q9VRY4_DROME	0.0616	2	8	29	1.27778	0.353637	0.188027	0.72578
Q9VS34	60S ribosomal protein L18 GN=RpL18	RL18_DROME	0.3511	1	6	130	1.06452	0.0901978	0.614927	0.211176
Q9VS83	CG7546, isoform B GN=CG7546	Q9VS83_DROME	0.0969	8	10	36	1.16667	0.222392	0.488053	0.311533
Q9VSA3	Probable medium-chain specific acyl-CoA dehydrogenase, mitochondrial GN=CG12262	ACADM_DROME	0.432	1	17	121	1.42029	0.506185	0.0469808	1.32808
Q9VSC5	CG8209 GN=CG8209	Q9VSC5_DROME	0.4411	1	11	121	1.68333	0.751321	0.0221785	1.65407
Q9VSD6	D-Importin 7/RanBP7 GN=msk	Q9VSD6_DROME	0.1754	1	16	119	1.19231	0.253757	0.360822	0.442707			0.442707
Q9VSD7	Lariat debranching enzyme GN=ldbr	DBR1_DROME	0.1685	1	8	25	0.592593	-0.754888	0.216158	0.665228
Q9VSK9	CG6745 GN=CG6745	Q9VSK9_DROME	0.203	1	14	84	0.939394	-0.0901978	0.536963	0.270055
Q9VSL4	Glutathione S transferase O2, isoform B GN=GstO2	Q9VSL4_DROME	0.244	1	7	38	1.47619	0.561879	0.114364	0.941712														0.941712
Q9VSN2	CG6416-PA, isoform A GN=Zasp66	Q9VSN2_DROME	0.3808	8	2	29	0.545455	-0.874469	0.00318021	2.49754
Q9VSR5	CG5012-PA GN=mRpL12	Q9VSR5_DROME	0.4231	1	6	55	1.19444	0.25634	0.366297	0.436167
Q9VSS1	Pixie, isoform A GN=pix	Q9VSS1_DROME	0.1686	1	10	61	0.862745	-0.212994	0.257663	0.588948
Q9VSS2	Signal recognition particle subunit SRP68 GN=Srp68	SRP68_DROME	0.399	1	22	121	0.927083	-0.109229	0.574823	0.240466
Q9VSU6	Dihydropteridine reductase GN=Dhpr	Q9VSU6_DROME	0.2894	1	7	52	2.55556	1.35364	0.000913682	3.0392
Q9VSW2	RE14081p GN=UGP	Q9VSW2_DROME	0.3002	4	15	77	2	1	0.0743557	1.12869
Q9VSW7	CG4452, isoform A GN=CG4452	Q9VSW7_DROME	0.1564	2	5	32	1	0	1	0
Q9VSY1	CG4022, isoform A GN=CG4022	Q9VSY1_DROME	0.1243	1	6	30	1.66667	0.736966	0.152822	0.815813
Q9VSY4	Alpha-tubulin N-acetyltransferase 1 GN=CG3967	ATAT1_DROME	0.256	2	13	68	0.925926	-0.111031	0.665205	0.177045
Q9VT19	CG3335 GN=CG3335	Q9VT19_DROME	0.085	1	7	33	0.888889	-0.169925	0.506021	0.295831
Q9VT32	CG6767, isoform A GN=CG6767	Q9VT32_DROME	0.2343	6	7	56	2	1	0.000964535	3.01568
Q9VT38	CG18178, isoform A GN=CG18178	Q9VT38_DROME	0.1658	1	6	26	1.11111	0.152003	0.776448	0.109888
Q9VT61	CG8108, isoform A GN=CG8108	Q9VT61_DROME	0.4233	1	37	289	0.917749	-0.123829	0.480817	0.31802
Q9VT75	CG11989-PA, isoform A GN=vnc	Q9VT75_DROME	0.3214	1	6	41	1.61905	0.695145	0.08356	1.078
Q9VT99	Ataxin-2 binding protein 1, isoform J GN=A2bp1	Q9VT99_DROME	0.0585	4	1	26	1.11111	0.152003	0.776448	0.109888
Q9VTB0	CG8003, isoform A GN=CG8003	Q9VTB0_DROME	0.172	1	7	27	1.16667	0.222392	0.673752	0.1715
Q9VTC1	CG6418 GN=CG6418	Q9VTC1_DROME	0.1896	1	12	57	1.12821	0.174029	0.673224	0.17184
Q9VTE5	Probable prefoldin subunit 2 GN=l(3)01239	PFD2_DROME	0.3916	1	7	66	2.11111	1.078	0.0689883	1.16122							1.16122
Q9VTE6	CG7839 GN=CG7839	Q9VTE6_DROME	0.1448	1	14	63	0.77193	-0.373458	0.107718	0.96771
Q9VTE9	Nedd8-activating enzyme E1 regulatory subunit GN=APP-BP1	ULA1_DROME	0.145	1	7	30	1.09524	0.131245	0.75454	0.122318
Q9VTF8	CG7636-PA GN=mRpL2	Q9VTF8_DROME	0.1531	1	4	28	1.22222	0.289507	0.315334	0.50123
Q9VTH1	LD21888p GN=Ube3a	Q9VTH1_DROME	0.0627	1	6	26	1.4	0.485427	0.453253	0.343659
Q9VTP4	60S ribosomal protein L10a-2 GN=RpL10Ab	R10AB_DROME	0.4055	1	8	155	1.5119	0.596367	0.132672	0.877221
Q9VTU4	Eukaryotic translation initiation factor 3 subunit L GN=CG5642	EIF3L_DROME	0.2263	1	11	69	1.75758	0.813587	0.068623	1.16353
Q9VTW1	CG4300, isoform B GN=CG4300	Q9VTW1_DROME	0.2541	4	10	64	2.33333	1.22239	0.00852835	2.06913
Q9VTY2	CG10638, isoform A GN=CG10638	Q9VTY2_DROME	0.3375	1	10	78	1.83333	0.874469	0.0297721	1.52619
Q9VTY8	FI02033p GN=sti	Q9VTY8_DROME	0.1241	2	22	65	1.21429	0.280108	0.194586	0.710888
Q9VTZ0	GH08269p GN=tral	Q9VTZ0_DROME	0.4586	8	23	298	1.14925	0.200697	0.172795	0.762469
Q9VTZ4	LD02044p GN=nst	Q9VTZ4_DROME	0.1894	1	9	31	1.14286	0.192645	0.788167	0.103382
Q9VU35	CG11267-PA GN=CG11267	Q9VU35_DROME	0.5825	2	6	77	1.64103	0.714598	0.0752094	1.12373											1.12373
Q9VU43	FI04407p GN=SRm160	Q9VU43_DROME	0.1279	1	11	41	1.375	0.459432	0.3234	0.49026
Q9VU58	Neuropeptide-like 2 GN=Nplp2	NPLP2_DROME	0.407	1	3	26	1.4	0.485427	0.37941	0.420891
Q9VU68	Actin-interacting protein 1 GN=flr	WDR1_DROME	0.4819	2	23	196	1.70833	0.77259	0.00450006	2.34678
Q9VU76	CG10732-PA, isoform A GN=CG10732	Q9VU76_DROME	0.1955	4	26	97	0.864198	-0.210567	0.337348	0.471922
Q9VU84	Drebrin-like protein GN=Abp1	DBNL_DROME	0.307	1	12	84	1.14035	0.189478	0.457052	0.340035
Q9VUA5	LD42058p GN=ssp2	Q9VUA5_DROME	0.0815	1	6	29	1.6	0.678072	0.173659	0.760304
Q9VUB5	UpSET, isoform A GN=upSET	Q9VUB5_DROME	0.0677	1	16	66	0.824561	-0.278301	0.406129	0.391336
Q9VUB8	CG6513-PA, isoform A GN=endos	Q9VUB8_DROME	0.4034	1	5	98	1.22222	0.289507	0.691975	0.159909
Q9VUC1	CG6603-PA, isoform A GN=Hsc70Cb	Q9VUC1_DROME	0.3831	2	26	293	1.62	0.695994	0.0323586	1.49001							1.49001
Q9VUE5	LD17962p GN=stwl	Q9VUE5_DROME	0.1331	2	11	35	1.125	0.169925	0.716329	0.144888
Q9VUE8	Big bang, isoform C GN=bbg	Q9VUE8_DROME	0.0611	5	15	22	0.0740741	-3.75489	0.000306792	3.51316
Q9VUH6	Myopic GN=mop	Q9VUH6_DROME	0.0638	1	10	44	1.2963	0.374396	0.238333	0.622817
Q9VUH8	RE01471p GN=Tdrd3	Q9VUH8_DROME	0.311	1	21	104	1.24242	0.313158	0.380104	0.420097
Q9VUJ1	Proteasome subunit beta type GN=Prosbeta2	Q9VUJ1_DROME	0.3015	2	9	77	1.5	0.584963	0.00420488	2.37625				2.37625
Q9VUM1	LD41209p GN=Prp31	Q9VUM1_DROME	0.1557	1	8	45	1.16667	0.222392	0.432498	0.364016
Q9VUN9	CG7857 GN=CG7857-RA	Q9VUN9_DROME	0.2179	1	6	53	0.928571	-0.106915	0.603645	0.219218
Q9VUQ5	Protein argonaute-2 GN=AGO2	AGO2_DROME	0.3921	3	24	145	1.17708	0.235216	0.517413	0.286163													0.286163
Q9VUR2	CG12301 GN=CG12301	Q9VUR2_DROME	0.1595	1	12	53	0.844444	-0.243926	0.257663	0.588948
Q9VUR4	CG7656, isoform D GN=CG7656-RA	Q9VUR4_DROME	0.1755	1	1	30	2.16667	1.11548	0.00861833	2.06458
Q9VUV9	Putative U5 small nuclear ribonucleoprotein 200 kDa helicase GN=l(3)72Ab	U520_DROME	0.1718	1	35	138	1.01961	0.0280144	0.945003	0.0245666
Q9VUY9	Phosphoglucomutase GN=Pgm	PGM_DROME	0.2821	1	14	101	1.4386	0.524662	0.126997	0.896206
Q9VUZ8	CG13072-PA GN=PDCD-5	Q9VUZ8_DROME	0.4962	1	6	68	1.41026	0.495957	0.176845	0.752406
Q9VV43	TPPP family protein CG45057 GN=CG45057	Y5057_DROME	0.6771	2	12	102	1.21212	0.277534	0.318031	0.497531
Q9VV52	LD37257p GN=RAF2	Q9VV52_DROME	0.2399	1	21	158	1.17143	0.228269	0.449811	0.34697
Q9VV60	LD21116p GN=Aats-tyr	Q9VV60_DROME	0.4095	1	21	125	1.26923	0.343954	0.248457	0.604749
Q9VV74	Survival motor neuron protein GN=Smn	SMN_DROME	0.2832	1	5	36	1.16667	0.222392	0.419753	0.377006
Q9VV75	AT02348p GN=CG4169	Q9VV75_DROME	0.3614	1	12	94	1.5098	0.594361	0.0774631	1.1109						1.1109
Q9VVA0	Cold shock domain-containing protein CG9705 GN=CG9705	Y9705_DROME	0.1748	1	2	51	1.08333	0.115477	0.74567	0.127453
Q9VVA4	CG9674, isoform A GN=CG9674	Q9VVA4_DROME	0.2881	2	1	506	1.17262	0.229734	0.142478	0.846252					0.846252
Q9VVA6	Nuclear migration protein NudC GN=nudC	Q9VVA6_DROME	0.4307	1	15	114	1.31884	0.39927	0.113704	0.944225
Q9VVA7	Tumor suppressor protein 101 GN=TSG101	Q9VVA7_DROME	0.2525	1	9	37	1.72222	0.784271	0.0473831	1.32438
Q9VVC8	CG6664, isoform A GN=CG6664	Q9VVC8_DROME	0.2744	1	14	75	1.05556	0.0780025	0.697261	0.156605
Q9VVC9	CG7728-PA GN=CG7728	Q9VVC9_DROME	0.0906	1	8	33	1.2381	0.308122	0.494743	0.30562
Q9VVI0	SD09427p GN=U4-U6-60K	Q9VVI0_DROME	0.2043	1	9	62	0.958333	-0.0614005	0.776448	0.109888
Q9VVI1	CG7564, isoform B GN=CG7564	Q9VVI1_DROME	0.219	1	8	51	0.880952	-0.182864	0.677883	0.168846
Q9VVI9	Charged multivesicular body protein 5 GN=CG6259	CHMP5_DROME	0.3982	1	8	98	1.3	0.378512	0.173659	0.760304
Q9VVJ7	CG7484 GN=CG7484	Q9VVJ7_DROME	0.2865	1	4	22	3.33333	1.73697	0.00861833	2.06458
Q9VVK5	Adenosine deaminase-related growth factor A GN=Adgf-A	Q9VVK5_DROME	0.0814	1	5	25	1.05556	0.0780025	0.871929	0.059519
Q9VVK7	NUCB1 GN=NUCB1	Q9VVK7_DROME	0.1634	1	11	52	1	0	1	0
Q9VVL5	CG5567 GN=CG5567-RA	Q9VVL5_DROME	0.2121	1	6	26	8.33333	3.05889	0.0170879	1.76731
Q9VVL7	Dihydrolipoyl dehydrogenase GN=CG7430	Q9VVL7_DROME	0.2639	1	12	160	1.19048	0.251539	0.383816	0.415877
Q9VVS6	Autophagy-related protein 3 GN=Atg3	Q9VVS6_DROME	0.1636	1	5	34	1.08333	0.115477	0.806961	0.0931476
Q9VVU1	CG3902-PA GN=CG3902-RA	Q9VVU1_DROME	0.372	1	14	124	1.04444	0.0627358	0.647967	0.188447
Q9VVU2	CG6846-PA GN=RpL26	Q9VVU2_DROME	0.4698	2	9	150	0.948718	-0.0759489	0.739194	0.131242
Q9VVU6	CG6841-PA GN=CG6841	Q9VVU6_DROME	0.1987	1	17	78	1.66667	0.736966	0.0160063	1.79571
Q9VVV7	CG3808 GN=CG3808	Q9VVV7_DROME	0.1382	1	8	25	1.75	0.807355	0.194586	0.710888
Q9VVW6	CG6818-PA GN=MESR6	Q9VVW6_DROME	0.1872	2	8	46	1.2	0.263034	0.26657	0.574189
Q9VVY3	Glycogen-binding subunit 76A GN=Gbs-76A	GBS76_DROME	0.2599	1	13	70	1.125	0.169925	0.184281	0.73452
Q9VW09	E3 ubiquitin-protein ligase listerin GN=l(3)76BDr	LTN1_DROME	0.0681	1	11	30	1.66667	0.736966	0.114364	0.941712
Q9VW13	CG9330 GN=CG9330-RA	Q9VW13_DROME	0.1398	1	10	50	1.18182	0.241008	0.577758	0.238254
Q9VW26	Ornithine aminotransferase, mitochondrial GN=Oat	OAT_DROME	0.3016	1	10	34	3.44444	1.78427	0.189686	0.721966											0.721966
Q9VW52	Precursor RNA processing 3, isoform A GN=Prp3	Q9VW52_DROME	0.1672	2	10	64	1.08889	0.122857	0.680138	0.167403
Q9VW54	26S proteasome regulatory complex subunit p97 GN=Rpn1	Q9VW54_DROME	0.1991	1	20	143	1.15625	0.209453	0.389835	0.409119				0.409119
Q9VW56	Probable prefoldin subunit 6 GN=CG7770	PFD6_DROME	0.664	1	8	77	1.64103	0.714598	0.0109159	1.96194							1.96194
Q9VW59	LD16419p GN=RhoGDI	Q9VW59_DROME	0.5473	1	11	56	1.53333	0.616671	0.386255	0.413126
Q9VW66	CG7646, isoform A GN=CG7646	Q9VW66_DROME	0.2527	2	5	25	3.83333	1.9386	0.0836865	1.07734
Q9VW68	CG7433, isoform A GN=CG7433	Q9VW68_DROME	0.4095	1	18	139	1.59722	0.675565	0.0370181	1.43159
Q9VWA1	Clathrin light chain GN=Clc	CLC_DROME	0.3562	1	8	111	1.03704	0.0524674	0.751687	0.123963												0.123963			0.123963
Q9VWA8	Protein FRG1 homolog GN=FRG1	FRG1_DROME	0.1565	1	5	29	1.04762	0.0671142	0.864094	0.0634389
Q9VWB8	Nucleoporin 205kD, isoform A GN=Nup205	Q9VWB8_DROME	0.0934	2	18	77	1.17647	0.234465	0.446303	0.35037			0.35037
Q9VWD1	CG14235-PA, isoform A GN=CoVIb	Q9VWD1_DROME	0.6979	2	9	95	1.33333	0.415037	0.21012	0.677532
Q9VWD9	LD38919p GN=Ubqn	Q9VWD9_DROME	0.3236	1	12	117	1.96078	0.971431	0.0733724	1.13447
Q9VWF0	CG12237 GN=CG12237	Q9VWF0_DROME	0.2255	1	5	26	0.904762	-0.14439	0.806961	0.0931476
Q9VWF2	Supporter of activation of yellow protein GN=e(y)3	SAYP_DROME	0.0748	3	13	43	0.861111	-0.215729	0.619596	0.207891
Q9VWG1	CG14207, isoform D GN=HspB8	Q9VWG1_DROME	0.5902	2	1	69	1.96667	0.975752	0.112368	0.949359
Q9VWG3	40S ribosomal protein S10b GN=RpS10b	RS10B_DROME	0.3438	2	7	74	1.31111	0.39079	0.348196	0.458176
Q9VWH4-2	Isoform A of Probable isocitrate dehydrogenase [NAD] subunit alpha, mitochondrial GN=l(1)G0156 - [IDH3A_DROME]	IDH3A_DROME	0.4237	3	15	141	2.01667	1.01197	0.00731341	2.13588
Q9VWI1	5'-3' exoribonuclease 1 GN=pcm	Q9VWI1_DROME	0.0806	2	10	35	1.33333	0.415037	0.545339	0.263334
Q9VWI2	NAT1 ortholog, isoform A GN=Nat1	Q9VWI2_DROME	0.3034	1	25	137	1.13978	0.188762	0.353706	0.451357
Q9VWK5	GH15225p GN=Ulp1	Q9VWK5_DROME	0.1223	1	15	59	0.895833	-0.158698	0.585511	0.232465			0.232465
Q9VWP1	CG7288 GN=CG7288	Q9VWP1_DROME	0.2206	1	11	39	2.91667	1.54432	0.0759761	1.11932
Q9VWP5	CG34422, isoform D GN=CG34422	Q9VWP5_DROME	0.134	2	30	143	0.801587	-0.319068	0.0523535	1.28105
Q9VWP8	CG42450, isoform A GN=CG42450	Q9VWP8_DROME	0.1053	2	9	28	1	0	1	0
Q9VWQ6	CG18259-PA GN=CG18259-RA	Q9VWQ6_DROME	0.2004	2	8	27	2.66667	1.41504	0.180493	0.743538
Q9VWT1	GH22474p GN=Aats-his	Q9VWT1_DROME	0.3008	3	15	55	1.7037	0.768674	0.099617	1.00167
Q9VWV6	Transferrin GN=Tsf1	Q9VWV6_DROME	0.4228	1	24	203	1.10638	0.145851	0.474118	0.324114
Q9VX32-2	Isoform 2 of Rho GTPase-activating protein 190 GN=RhoGAPp190 - [RG190_DROME]	RG190_DROME	0.1202	5	18	81	1.01667	0.0238467	0.93702	0.0282511
Q9VX36	CG5703, isoform A GN=CG5703	Q9VX36_DROME	0.3347	1	7	55	1.33333	0.415037	0.216158	0.665228						0.665228
Q9VX38	CG8326 GN=CG8326	Q9VX38_DROME	0.2319	1	8	27	0.791667	-0.337035	0.375818	0.425023
Q9VX91	E3 ubiquitin-protein ligase UBR1 GN=UBR1	UBR1_DROME	0.0685	1	12	26	0.904762	-0.14439	0.806961	0.0931476
Q9VX98	CG9099, isoform B GN=CG9099	Q9VX98_DROME	0.2593	1	5	58	0.955556	-0.0655883	0.603645	0.219218													0.219218
Q9VXE6	Nuclear pore complex protein Nup153 GN=Nup153	NU153_DROME	0.1636	2	25	117	1.29167	0.369234	0.222343	0.652977			0.652977
Q9VXE9	CG9802-PA, isoform A GN=Cap	Q9VXE9_DROME	0.2008	1	22	76	1.07407	0.103093	0.78541	0.104903
Q9VXF1	Serine/threonine-protein phosphatase 2B catalytic subunit 3 GN=CanA-14F	PP2B3_DROME	0.2654	2	6	111	1.27536	0.350907	0.227006	0.643962
Q9VXF9	AT13091p GN=rngo	Q9VXF9_DROME	0.2533	1	10	88	1.06349	0.0888093	0.603645	0.219218
Q9VXG4	Annexin B11 GN=AnxB11	ANX11_DROME	0.1663	3	7	41	2.4	1.26303	0.0025786	2.58862
Q9VXI1	CG9914, isoform A GN=CG9914	Q9VXI1_DROME	0.2381	1	7	38	0.818182	-0.289507	0.603645	0.219218
Q9VXI3	CG9911, isoform C GN=CG9911	Q9VXI3_DROME	0.24	2	8	62	1.14286	0.192645	0.481618	0.317297
Q9VXJ0	Peroxisomal multifunctional enzyme type 2 GN=Mfe2	DHB4_DROME	0.2274	1	12	53	1.62963	0.704544	0.0350772	1.45498
Q9VXK5	Putative rRNA methyltransferase GN=CG8939	Q9VXK5_DROME	0.1542	1	12	39	0.666667	-0.584963	0.194706	0.71062
Q9VXK6	Eukaryotic translation initiation factor 5 GN=eIF5	IF5_DROME	0.278	1	12	55	0.888889	-0.169925	0.663269	0.178311													0.178311
Q9VXM4	LD12946p GN=MSBP	Q9VXM4_DROME	0.2379	1	4	30	0.916667	-0.125531	0.603645	0.219218
Q9VXN3	CG8578, isoform A GN=CG8578	Q9VXN3_DROME	0.3662	1	12	47	1.23333	0.302563	0.491499	0.308478
Q9VXN4	Probable arginine--tRNA ligase, cytoplasmic GN=Aats-arg	SYRC_DROME	0.3218	1	21	126	1.16667	0.222392	0.143691	0.842569
Q9VXP4	Platelet-activating factor acetylhydrolase IB subunit beta homolog GN=Paf-AHalpha	PA1B2_DROME	0.3156	1	6	32	5	2.32193	0.0134	1.8729
Q9VXQ0	CG8288-PA GN=mRpL3	Q9VXQ0_DROME	0.2182	1	7	29	1.6	0.678072	0.358656	0.445322											0.445322
Q9VXQ5	GH13725p GN=Tcp-1zeta	Q9VXQ5_DROME	0.4315	1	23	259	1.67442	0.74366	0.040303	1.39466							1.39466
Q9VXR5	CG9281, isoform B GN=CG9281	Q9VXR5_DROME	0.1849	1	11	72	1.16667	0.222392	0.596848	0.224137
Q9VXT7	Probable isoaspartyl peptidase/L-asparaginase CG7860 GN=CG7860	ASGL1_DROME	0.1928	1	5	35	0.833333	-0.263034	0.432498	0.364016
Q9VXU2	Golgi microtubule-associated protein, isoform A GN=Gmap	Q9VXU2_DROME	0.1938	2	23	82	1.48889	0.574236	0.203195	0.692088
Q9VXX8	Probable 60S ribosomal protein L37-A GN=RpL37a	RL371_DROME	0.3978	1	4	40	0.878788	-0.186413	0.488053	0.311533
Q9VXZ8	BcDNA.GH02901 GN=pdgy	Q9VXZ8_DROME	0.201	1	10	53	1.27273	0.347923	0.310361	0.508133																						0.508133
Q9VY05	CG9512, isoform A GN=CG9512	Q9VY05_DROME	0.122	1	7	24	0.666667	-0.584963	0.582137	0.234975
Q9VY76	AMP deaminase, isoform E GN=AMPdeam	Q9VY76_DROME	0.1751	9	14	86	1.1	0.137504	0.591313	0.228183
Q9VY87	Cathepsin B1, isoform A GN=CtsB1	Q9VY87_DROME	0.1324	1	4	26	0.75	-0.415037	0.26657	0.574189
Q9VY91	LD21074p GN=Pdcd4	Q9VY91_DROME	0.1552	1	8	103	1.47368	0.559427	0.0501664	1.29959
Q9VY92	CG11151, isoform B GN=CG11151	Q9VY92_DROME	0.5826	1	6	23	7.33333	2.87447	0.13264	0.877325
Q9VYA7	RRP12-like protein GN=CG2691	RRP12_DROME	0.1084	1	12	44	0.644444	-0.633872	0.148769	0.827489
Q9VYD8	CG1987-PA GN=Rbp1-like	Q9VYD8_DROME	0.3101	2	1	31	1.38889	0.473931	0.366297	0.436167
Q9VYG2	Brahma-associated protein of 60 kDa GN=Bap60	BAP60_DROME	0.2466	1	13	66	1.35897	0.442518	0.103692	0.984253
Q9VYK0	Smrter, isoform D GN=Smr	Q9VYK0_DROME	0.1069	2	24	92	1.2	0.263034	0.315334	0.50123
Q9VYL7	CG11138, isoform C GN=CG11138	Q9VYL7_DROME	0.1496	3	8	51	1.55556	0.63743	0.00318021	2.49754
Q9VYQ9	LD24662p GN=Tango4	Q9VYQ9_DROME	0.1556	1	6	33	1.5	0.584963	0.103437	0.985323
Q9VYR1	Regucalcin homologue GN=regucalcin	Q9VYR1_DROME	0.4884	2	12	131	2.09259	1.06529	0.00211875	2.67392
Q9VYS3	Regulator of nonsense transcripts 1 homolog GN=Upf1	RENT1_DROME	0.0898	1	9	35	1.61111	0.688056	0.113704	0.944225
Q9VYT3	CG2025 GN=CG2025	Q9VYT3_DROME	0.1604	1	19	108	1.10667	0.146221	0.473227	0.324931
Q9VYU0	Rudhira, isoform C GN=rudhira	Q9VYU0_DROME	0.04	1	4	27	0.952381	-0.0703893	0.878548	0.0562346
Q9VYV4	Amun, isoform A GN=Amun	Q9VYV4_DROME	0.4036	1	16	157	1.35484	0.438121	0.089483	1.04826
Q9VYW4	CG1703, isoform A GN=CG1703	Q9VYW4_DROME	0.1598	1	12	54	0.666667	-0.584963	0.0104017	1.98289
Q9VYY3	Ubiquitin-like modifier-activating enzyme 5 GN=CG1749	UBA5_DROME	0.1906	1	8	59	1.45455	0.540568	0.16493	0.782699
Q9VYY7	Heterochromatin protein 5, isoform B GN=HP5	Q9VYY7_DROME	0.2939	3	20	143	0.888889	-0.169925	0.554399	0.256177
Q9VYY9-2	Isoform B of Ecotropic viral integration site 5 ortholog GN=Evi5 - [EVI5_DROME]	EVI5_DROME	0.2529	4	17	54	1.16667	0.222392	0.742493	0.129308
Q9VZ20	Dynein light intermediate chain, isoform A GN=Dlic	Q9VZ20_DROME	0.2698	2	12	90	0.916667	-0.125531	0.481618	0.317297
Q9VZ23	GTP-binding nuclear protein Ran GN=ran	RAN_DROME	0.5093	1	9	99	1.5	0.584963	0.0317933	1.49766									1.49766
Q9VZ60	CG2186, isoform A GN=CG2186	Q9VZ60_DROME	0.1995	1	17	74	1.31111	0.39079	0.243737	0.613078
Q9VZC8	CG15019, isoform B GN=CG15019	Q9VZC8_DROME	0.4384	1	5	41	0.909091	-0.137504	0.724605	0.139899
Q9VZE4	CG1316 GN=CG1316	Q9VZE4_DROME	0.2362	1	10	65	1.21429	0.280108	0.439085	0.357452
Q9VZE6	Ribosome biogenesis protein BRX1 homolog GN=CG11583	BRX1_DROME	0.3565	1	11	47	1.23333	0.302563	0.634314	0.197695
Q9VZF6	CG14997, isoform A GN=CG14997	Q9VZF6_DROME	0.1641	1	6	27	1.16667	0.222392	0.643762	0.191275
Q9VZF9	Cuticular protein 64Ad GN=Cpr64Ad	Q9VZF9_DROME	0.3806	1	6	72	1.66667	0.736966	0.0300197	1.52259
Q9VZI1	CG14996-PB GN=Chd64	Q9VZI1_DROME	0.516	2	8	79	1.12963	0.17585	0.398509	0.399562
Q9VZI3	Unc-112-related protein GN=Fit1	UN112_DROME	0.1864	2	12	43	0.969697	-0.0443941	0.897456	0.0469868
Q9VZL3	Sc2 GN=Sc2	Q9VZL3_DROME	0.1722	1	4	25	0.857143	-0.222392	0.37941	0.420891
Q9VZP5	FI21437p1 GN=eIF5B	Q9VZP5_DROME	0.1329	3	13	57	1.12821	0.174029	0.611866	0.213344													0.213344
Q9VZQ3	CG12008-PA, isoform A GN=kst	Q9VZQ3_DROME	0.1274	5	49	178	0.59375	-0.752072	0.0174663	1.7578
Q9VZQ8	Glutathione peroxidase GN=PHGPx	Q9VZQ8_DROME	0.432	3	7	116	1.15385	0.206451	0.532206	0.273921
Q9VZQ9	AT20596p GN=Strip	Q9VZQ9_DROME	0.0964	2	8	52	1	0	1	0
Q9VZS1	CG17746, isoform A GN=CG17746	Q9VZS1_DROME	0.2022	2	6	29	0.740741	-0.432959	0.348196	0.458176										0.458176
Q9VZS3	Protein translation factor SUI1 homolog GN=CG17737	SUI1_DROME	0.5818	1	6	56	3.4	1.76553	0.106558	0.972413													0.972413
Q9VZS5	60S ribosomal protein L28 GN=RpL28	RL28_DROME	0.4444	1	8	90	1.09524	0.131245	0.562764	0.249673
Q9VZU4	CG12079-PA GN=NDUFS3	Q9VZU4_DROME	0.3208	1	7	48	1.26667	0.341037	0.373771	0.427395
Q9VZU7	Ubiquitin carboxyl-terminal hydrolase GN=CG12082	Q9VZU7_DROME	0.3543	1	25	206	1.12766	0.173332	0.2585	0.58754
Q9VZX9	Adenosylhomocysteinase GN=CG9977-RA	Q9VZX9_DROME	0.334	3	15	129	1.1	0.137504	0.6359	0.196611
Q9VZY0	LD45195p GN=Non2	Q9VZY0_DROME	0.3074	1	8	106	1.08	0.111031	0.577758	0.238254
Q9W002	Misshapen, isoform A GN=msn	Q9W002_DROME	0.1316	6	16	105	1.01282	0.0183785	0.923347	0.0346351
Q9W058	Succinyl-CoA:3-ketoacid-coenzyme A transferase GN=SCOT	Q9W058_DROME	0.2093	3	9	36	1	0	1	0
Q9W062	GH07619p GN=Mfap1	Q9W062_DROME	0.182	1	8	42	1.22222	0.289507	0.562764	0.249673
Q9W0A8	FI01658p GN=RpL23A	Q9W0A8_DROME	0.2924	1	9	170	0.954545	-0.0671142	0.855199	0.0679327
Q9W0A9	CG7974, isoform A GN=CG7974	Q9W0A9_DROME	0.1803	1	5	27	0.791667	-0.337035	0.476294	0.322125
Q9W0B3	CG7967 GN=CG7967	Q9W0B3_DROME	0.2595	1	9	37	2.13333	1.09311	0.158273	0.800594
Q9W0B6	CG17249 GN=CG17249	Q9W0B6_DROME	0.178	1	6	30	1.33333	0.415037	0.527299	0.277943
Q9W0B8	Coatomer subunit alpha GN=alphaCOP	Q9W0B8_DROME	0.2269	1	27	150	1.27957	0.355659	0.337111	0.472227												0.472227
Q9W0C3	CG13928-PA GN=CG13928	Q9W0C3_DROME	0.5673	1	13	101	1.4386	0.524662	0.0428822	1.36772
Q9W0E4	Puromycin sensitive aminopeptidase, isoform A GN=Psa	Q9W0E4_DROME	0.3199	3	29	186	1.14286	0.192645	0.0654412	1.18415
Q9W0H6	CG9149 GN=CG9149	Q9W0H6_DROME	0.1913	1	7	41	1.03333	0.0473057	0.920074	0.0361772
Q9W0H8	CG9148-PA, isoform A GN=scf	Q9W0H8_DROME	0.4255	2	15	105	1.41667	0.5025	0.039803	1.40008
Q9W0L7	CG32479, isoform A GN=CG13903	Q9W0L7_DROME	0.0428	2	6	25	0.857143	-0.222392	0.625301	0.203911
Q9W0M4	CG13887, isoform C GN=CG13887	Q9W0M4_DROME	0.2149	1	5	26	1.11111	0.152003	0.419753	0.377006
Q9W0M7	CG13900-PA, isoform A GN=CG13900-RA	Q9W0M7_DROME	0.194	2	21	80	1.14815	0.199309	0.596848	0.224137
Q9W0P8	Mediator of RNA polymerase II transcription subunit 14 GN=MED14	MED14_DROME	0.0502	2	7	26	0.904762	-0.14439	0.776448	0.109888
Q9W0Q2	Peptidyl-prolyl cis-trans isomerase GN=Cypl	Q9W0Q2_DROME	0.3125	1	5	34	1.28571	0.36257	0.26657	0.574189							0.574189														0.574189
Q9W0R0	Cell division cycle 5 ortholog, isoform A GN=Cdc5	Q9W0R0_DROME	0.3649	1	25	151	1.02703	0.0384741	0.86947	0.0607456
Q9W0S5	Miple, isoform A GN=miple	Q9W0S5_DROME	0.2703	1	6	42	1.22222	0.289507	0.26657	0.574189
Q9W0S7	LD20211p GN=Tudor-SN	Q9W0S7_DROME	0.4363	1	38	307	1.34426	0.426815	0.00724617	2.13989
Q9W0T1-2	Isoform B of Nucleosome-remodeling factor subunit NURF301 GN=E(bx) - [NU301_DROME]	NU301_DROME	0.1933	8	44	237	1.15723	0.210679	0.412784	0.384277
Q9W0Z3	Activating transcription factor-2, isoform B GN=Atf-2	Q9W0Z3_DROME	0.1157	2	5	30	0.575758	-0.796467	0.0828138	1.0819
Q9W124	CG4806 GN=CG4806	Q9W124_DROME	0.1689	1	10	51	0.561404	-0.83289	0.00723183	2.14075
Q9W125	CG3683 protein GN=NDUFA8	Q9W125_DROME	0.44	1	7	33	1.2381	0.308122	0.705726	0.151364						0.151364
Q9W140	CG3548 GN=CG3548	Q9W140_DROME	0.2848	1	12	58	1.15385	0.206451	0.506021	0.295831
Q9W141	Putative ATP synthase subunit f, mitochondrial GN=CG4692	ATPK_DROME	0.3832	2	4	38	0.933333	-0.0995357	0.680138	0.167403
Q9W147	Fcp1 GN=Fcp1	Q9W147_DROME	0.275	1	18	107	1.15278	0.205114	0.251993	0.598612
Q9W158	CG4612 GN=CG4612	Q9W158_DROME	0.2215	1	7	48	1.12121	0.165059	0.740859	0.130264
Q9W1A3	Zinc finger protein RP-8 GN=Zfrp8	Q9W1A3_DROME	0.1902	1	6	25	1.33333	0.415037	0.552968	0.2573
Q9W1B0	Serine/threonine-protein kinase Genghis Khan GN=gek	GEK_DROME	0.1185	1	18	72	1.16667	0.222392	0.680138	0.167403
Q9W1B9	RE28824p GN=RpL12	Q9W1B9_DROME	0.3576	1	4	66	1.66667	0.736966	0.363769	0.439175
Q9W1C8	CG3163 GN=CG3163	Q9W1C8_DROME	0.2418	1	9	36	1	0	1	0
Q9W1F7	CG2970 GN=CG2970	Q9W1F7_DROME	0.1776	1	6	26	1.83333	0.874469	0.152822	0.815813
Q9W1G0	Probable transaldolase GN=Tal	TALDO_DROME	0.2598	1	9	51	3.06667	1.61667	0.1213	0.916138
Q9W1G5	CG5594, isoform C GN=kcc	Q9W1G5_DROME	0.0859	2	1	26	0.388889	-1.36257	0.0113584	1.94468
Q9W1G7	LD21576p GN=Nap1	Q9W1G7_DROME	0.3946	1	11	170	1.62069	0.696608	0.00957466	2.01888
Q9W1H3	FI21285p1 GN=Upf3	Q9W1H3_DROME	0.1646	1	7	24	0.466667	-1.09954	0.0396598	1.40165
Q9W1H4	DNA ligase 1 GN=DNA-ligI	DNLI1_DROME	0.162	1	10	40	0.878788	-0.186413	0.680138	0.167403
Q9W1H5	Decapping protein 1, isoform A GN=Dcp1	Q9W1H5_DROME	0.2957	1	8	80	1.23529	0.304855	0.106558	0.972413
Q9W1H8	GH13256p GN=Thiolase	Q9W1H8_DROME	0.1876	1	9	61	1.02222	0.0317089	0.878548	0.0562346
Q9W1I6	LD12035p GN=ytr	Q9W1I6_DROME	0.5103	1	7	66	0.824561	-0.278301	0.152822	0.815813
Q9W1I8	Synaptosomal-associated protein GN=Snap29	Q9W1I8_DROME	0.331	1	8	62	1.73333	0.793549	0.0307908	1.51158															1.51158
Q9W1J3	Gastrulation defective protein 1 homolog GN=CG5543	GAD1_DROME	0.1771	1	10	32	1.44444	0.530515	0.279658	0.553372
Q9W1N4	HL01517p GN=wmd	Q9W1N4_DROME	0.436	1	10	44	2.11111	1.078	0.0632935	1.19864
Q9W1Q8	LD05345p GN=eIF2B-delta	Q9W1Q8_DROME	0.2732	1	2	66	0.960784	-0.0577155	0.827641	0.0821578
Q9W1R3	CG3493 GN=Golgin245	Q9W1R3_DROME	0.2089	1	26	108	0.952381	-0.0703893	0.806961	0.0931476
Q9W1V3	rRNA 2'-O-methyltransferase fibrillarin GN=Fib	FBRL_DROME	0.3547	1	13	79	1.21569	0.281771	0.0630401	1.20038
Q9W1X4	Nuclear pore complex protein Nup214 GN=Nup214	NU214_DROME	0.0935	1	14	68	1.41026	0.495957	0.103046	0.986968			0.986968
Q9W227	Peptidyl-prolyl cis-trans isomerase GN=CG2852	Q9W227_DROME	0.4732	1	9	157	1.35484	0.438121	0.111867	0.951298							0.951298														0.951298
Q9W237	40S ribosomal protein S16 GN=RpS16	RS16_DROME	0.6351	1	10	80	1.14815	0.199309	0.190116	0.720981
Q9W252	DNA repair protein RAD50 GN=rad50	RAD50_DROME	0.1085	1	14	57	0.722222	-0.469485	0.216553	0.664436
Q9W254	Quaking related 58E-2 GN=qkr58E-2	Q9W254_DROME	0.2356	1	10	74	1.31111	0.39079	0.143691	0.842569
Q9W255	GH05812p GN=qkr58E-1	Q9W255_DROME	0.3207	1	12	69	1.4359	0.521953	0.0483948	1.3152
Q9W258	CG3624 GN=babos	Q9W258_DROME	0.301	1	6	31	0.958333	-0.0614005	0.85462	0.0682269
Q9W261	RNA polymerase-associated protein Rtf1 GN=Rtf1	RTF1_DROME	0.089	1	7	31	0.606061	-0.722466	0.0160063	1.79571
Q9W290	GM130, isoform B GN=GM130	Q9W290_DROME	0.3603	2	23	125	1.26923	0.343954	0.00420488	2.37625
Q9W2D9	Eukaryotic translation initiation factor 3 subunit K GN=CG10306	EIF3K_DROME	0.2207	1	4	25	3.83333	1.9386	0.0174304	1.75869													1.75869
Q9W2E7	Rae1 GN=Rae1	Q9W2E7_DROME	0.4249	1	11	63	1.16667	0.222392	0.472277	0.325803			0.325803
Q9W2I2	CG9752 GN=CG9752	Q9W2I2_DROME	0.2449	1	9	38	1.47619	0.561879	0.298842	0.524558
Q9W2J5	Glycogenin, isoform A GN=Glycogenin	Q9W2J5_DROME	0.3968	1	12	73	0.477778	-1.06559	0.0206581	1.68491
Q9W2J6	Glycogenin, isoform B GN=Glycogenin	Q9W2J6_DROME	0.0781	2	3	33	1.2381	0.308122	0.340528	0.467847
Q9W2K4	CG4266, isoform A GN=CG4266	Q9W2K4_DROME	0.1086	2	9	33	0.888889	-0.169925	0.625301	0.203911
Q9W2M0	CG4030 GN=Rbpn-5	Q9W2M0_DROME	0.289	1	17	76	1.07407	0.103093	0.820689	0.0858216
Q9W2M2-2	Isoform A of Trehalase GN=Treh - [TREA_DROME]	TREA_DROME	0.3589	3	18	118	0.790476	-0.339206	0.129982	0.886117
Q9W2M4	CG10527 GN=CG10527	Q9W2M4_DROME	0.2736	1	7	60	1.48485	0.570316	0.08708	1.06008
Q9W2N0	F-actin-capping protein subunit alpha GN=cpa	CAPZA_DROME	0.3671	1	9	48	1.44444	0.530515	0.133975	0.872978
Q9W2U4	Serine/threonine-protein phosphatase 4 regulatory subunit 2 GN=PPP4R2r	PP4R2_DROME	0.4532	2	22	292	1.1641	0.219218	0.340901	0.467372										0.467372
Q9W2X6	Lethal (1) G0230, isoform A GN=l(1)G0230	Q9W2X6_DROME	0.2803	1	4	37	2.13333	1.09311	0.0623392	1.20524						1.20524					1.20524
Q9W2Y4	CG2972, isoform B GN=CG2972	Q9W2Y4_DROME	0.2479	1	9	25	1.05556	0.0780025	0.871929	0.059519
Q9W2Y5	ZAP3, isoform C GN=ZAP3	Q9W2Y5_DROME	0.1672	4	24	105	1.125	0.169925	0.553716	0.256713
Q9W303	Chitinase-like protein Idgf4 GN=Idgf4	IDGF4_DROME	0.2851	1	11	64	1.44444	0.530515	0.331393	0.479656
Q9W309	CG9686 GN=CG9686	Q9W309_DROME	0.2531	1	4	41	1.03333	0.0473057	0.871929	0.059519
Q9W321	Nejire, isoform B GN=nej	Q9W321_DROME	0.0296	3	9	34	2.5	1.32193	0.0654412	1.18415
Q9W330	Hexokinase A, isoform A GN=Hex-A	Q9W330_DROME	0.3715	2	16	72	1.26667	0.341037	0.532206	0.273921
Q9W362	LD09531p GN=Larp7	Q9W362_DROME	0.1882	1	7	42	0.939394	-0.0901978	0.724605	0.139899
Q9W379	LD37736p GN=Zpr1	Q9W379_DROME	0.1422	1	6	35	1.125	0.169925	0.453253	0.343659
Q9W384	DALAO protein GN=dalao	Q9W384_DROME	0.3138	1	15	102	1.55556	0.63743	0.105436	0.977011
Q9W392	CG7033 GN=CG7033	Q9W392_DROME	0.4841	1	21	242	1.54264	0.625397	0.0308271	1.51107							1.51107
Q9W396	FI06908p GN=HP1b	Q9W396_DROME	0.2375	1	7	49	1.02778	0.0395284	0.871929	0.059519
Q9W3C1	Polycomb protein l(1)G0020 GN=l(1)G0020	U202_DROME	0.1617	2	15	54	1.05128	0.0721498	0.871929	0.059519
Q9W3C2	Uncharacterized protein CG1785 GN=CG1785	GSCR2_DROME	0.1172	1	6	31	1.14286	0.192645	0.625301	0.203911
Q9W3C3	CG2004, isoform A GN=CG2004	Q9W3C3_DROME	0.1671	1	7	26	1.83333	0.874469	0.004928	2.30733
Q9W3C4	Beta-hexosaminidase GN=Hexo2	Q9W3C4_DROME	0.127	1	8	33	1.2381	0.308122	0.611866	0.213344
Q9W3F6	CG1440, isoform A GN=CG1440	Q9W3F6_DROME	0.2193	4	10	51	1.36667	0.450661	0.273573	0.562926
Q9W3J1	Gbeta5 GN=Gbeta5	Q9W3J1_DROME	0.2011	1	5	30	0.916667	-0.125531	0.603645	0.219218
Q9W3J5	Probable phenylalanine--tRNA ligase alpha subunit GN=CG2263	SYFA_DROME	0.2651	1	13	48	1.12121	0.165059	0.488053	0.311533
Q9W3K5	Glutamate--cysteine ligase GN=Gclc	GSH1_DROME	0.0753	1	6	8	0	#NUM!	0.000146543	3.83404																		3.83404
Q9W3M7	CG10777, isoform B GN=CG10777	Q9W3M7_DROME	0.2497	1	19	181	1.175	0.232661	0.463014	0.334406
Q9W3N6	SD01505p GN=p115	Q9W3N6_DROME	0.1411	1	9	48	0.809524	-0.304855	0.398041	0.400072
Q9W3N9	CG10932, isoform A GN=CG10932	Q9W3N9_DROME	0.2537	1	9	61	1.11905	0.162271	0.657938	0.181815
Q9W3U1	CG32732 GN=CG12542	Q9W3U1_DROME	0.1341	1	7	27	0.952381	-0.0703893	0.93615	0.0286547
Q9W3U9	CG14434, isoform B GN=CG14434	Q9W3U9_DROME	0.385	2	6	67	1.52778	0.611435	0.0278274	1.55553
Q9W3W8	60S ribosomal protein L17 GN=RpL17	RL17_DROME	0.4301	1	8	35	1.125	0.169925	0.757296	0.120734
Q9W3X8	CG3198 GN=CG3198	Q9W3X8_DROME	0.1712	1	7	30	0.916667	-0.125531	0.724605	0.139899
Q9W3Y3	CG3226-PA GN=CG3226	Q9W3Y3_DROME	0.3826	1	8	57	1.77778	0.830075	0.0329657	1.48194
Q9W401	Probable citrate synthase, mitochondrial GN=kdn	CISY_DROME	0.2306	2	10	104	1.24242	0.313158	0.498394	0.302427
Q9W403	CG3847 GN=CG3847	Q9W403_DROME	0.1947	1	8	41	1.375	0.459432	0.296586	0.527849
Q9W414	Regulatory particle triple-A ATPase 4 GN=Rpt4	Q9W414_DROME	0.3275	2	13	94	2.07692	1.05445	0.021217	1.67332				1.67332
Q9W415	tRNA (guanine-N(7)-)-methyltransferase non-catalytic subunit wuho GN=wuho	WUHO_DROME	0.2406	1	7	51	1.55556	0.63743	0.272234	0.565058
Q9W420	Transcription elongation factor SPT6 GN=Spt6	SPT6H_DROME	0.071	1	12	51	1.08333	0.115477	0.74567	0.127453
Q9W425	Rabconnectin-3A GN=Rbcn-3A	Q9W425_DROME	0.0826	1	25	100	0.816092	-0.293196	0.103046	0.986968
Q9W437	Raptor, isoform B GN=raptor	Q9W437_DROME	0.082	1	11	31	0.958333	-0.0614005	0.884237	0.0534316
Q9W482	CG15929-PA GN=lin-52	Q9W482_DROME	0.3822	1	4	33	1.2381	0.308122	0.594881	0.22557
Q9W499	CG4111-PB, isoform B GN=RpL35	Q9W499_DROME	0.1789	1	3	31	3.11111	1.63743	0.446146	0.350523
Q9W4A6	CG42492, isoform A GN=CG11473	Q9W4A6_DROME	0.0502	1	3	23	1.2	0.263034	0.751687	0.123963
Q9W4D2	RNA-binding protein 4F GN=Rnp4F	RNP4F_DROME	0.1435	2	13	58	1.15385	0.206451	0.546061	0.262758
Q9W4H6	Pyruvate dehydrogenase E1 component subunit alpha GN=l(1)G0334	Q9W4H6_DROME	0.2607	3	12	66	0.960784	-0.0577155	0.806961	0.0931476
Q9W4I3	FI01736p GN=mRpL30	Q9W4I3_DROME	0.4444	1	8	59	1.07143	0.0995357	0.603645	0.219218
Q9W4J4	CG11444, isoform A GN=CG11444	Q9W4J4_DROME	0.1442	1	2	40	1.14815	0.199309	0.488053	0.311533
Q9W4K1	AP-3 complex subunit beta GN=rb	Q9W4K1_DROME	0.0845	1	9	32	0.636364	-0.652077	0.00542395	2.26568
Q9W4M7	Twenty-four, isoform B GN=tyf	Q9W4M7_DROME	0.2214	2	30	151	1.14706	0.197939	0.254872	0.593678
Q9W4M9	tRNA (cytosine(34)-C(5))-methyltransferase GN=Nsun2	NSUN2_DROME	0.1796	1	13	52	1.11111	0.152003	0.797039	0.0985207
Q9W4P5	V-type proton ATPase subunit d 1 GN=VhaAC39-1	VA0D1_DROME	0.1457	1	5	27	1.46667	0.552541	0.124058	0.906376						0.906376
Q9W4Q4	BcDNA.GH07910 GN=tlk	Q9W4Q4_DROME	0.1122	11	10	40	1.33333	0.415037	0.547162	0.261884
Q9W4U2	CG3603, isoform B GN=CG3603	Q9W4U2_DROME	0.2811	1	6	27	1.91667	0.938599	0.0170879	1.76731
Q9W4X7	Eukaryotic translation initiation factor 3 subunit G-1 GN=eIF3-S4-1	EI3G1_DROME	0.2825	1	7	105	1.01282	0.0183785	0.950143	0.022211													0.022211
Q9W4Y1	CG13759, isoform A GN=CG13759-RA	Q9W4Y1_DROME	0.3114	1	7	26	1.83333	0.874469	0.114364	0.941712
Q9W4Z9	CG3071-PA GN=EG:25E8.3	Q9W4Z9_DROME	0.1439	1	8	29	1.6	0.678072	0.127999	0.892795												0.892795
Q9W541	EIF2B-epsilon protein GN=eIF2B-epsilon	Q9W541_DROME	0.1031	1	7	27	1.46667	0.552541	0.197473	0.704492													0.704492
Q9W542	LD07342p GN=mip130	Q9W542_DROME	0.1684	1	14	58	1.15385	0.206451	0.527299	0.277943
Q9W550	CG14805 GN=CG14805-RA	Q9W550_DROME	0.1561	1	7	32	0.851852	-0.231326	0.133975	0.872978
Q9W552	Vacuolar protein sorting-associated protein 26 GN=Vps26	VPS26_DROME	0.1674	1	6	56	1.10256	0.140863	0.574154	0.240972
Q9W590	Large subunit GTPase 1 homolog GN=Ns3	LSG1_DROME	0.2178	1	12	45	1.54167	0.624491	0.142438	0.846373
Q9W596	Microtubule-associated protein futsch GN=futsch	FUTSC_DROME	0.4455	1	173	1536	1.03932	0.0556411	0.581042	0.235792
Q9W5E0	Histone-lysine N-methyltransferase Suv4-20 GN=Hmt4-20	SUV42_DROME	0.0846	2	9	27	0.952381	-0.0703893	0.878548	0.0562346
Q9W5E4	FI21448p1 GN=l(1)1Bi	Q9W5E4_DROME	0.0741	1	10	37	0.694444	-0.526069	0.387355	0.411891
Q9W5N0	Cytochrome c oxidase assembly factor 7 homolog GN=CG13865	COA7_DROME	0.3571	2	8	61	0.9375	-0.0931094	0.673752	0.1715
Q9W5N2	60S ribosomal protein L38 GN=RpL38	RL38_DROME	0.2857	1	2	86	1.25926	0.332575	0.405841	0.391644
Q9W5Q1	CG17168 GN=CG17168	Q9W5Q1_DROME	0.1829	1	7	26	1.11111	0.152003	0.724605	0.139899
Q9W5R8	60S ribosomal protein L5 GN=RpL5	RL5_DROME	0.3545	1	11	135	1.21839	0.284977	0.403614	0.394033
Q9W5W8	CG9577 GN=CG9577	Q9W5W8_DROME	0.25	1	7	38	6	2.58496	0.00704706	2.15199
Q9XTL2	Jak pathway signal transduction adaptor molecule GN=Stam	Q9XTL2_DROME	0.1611	1	10	72	1.07843	0.108934	0.693239	0.159117															0.159117
Q9XTL9	Glycogen phosphorylase GN=GlyP	PYG_DROME	0.4419	1	36	423	1.34524	0.427862	0.0326357	1.48631
Q9XYZ5	DNA damage-binding protein 1 GN=pic	DDB1_DROME	0.2333	1	23	126	1.49275	0.577976	0.0623392	1.20524
Q9XZ06	Nucleoporin 93kD-1 GN=Nup93-1	Q9XZ06_DROME	0.1507	1	11	59	0.977778	-0.0324215	0.897456	0.0469868			0.0469868
Q9XZ19	CG3909 GN=CG3909	Q9XZ19_DROME	0.3142	1	9	46	1.06061	0.0848889	0.827641	0.0821578
Q9XZ21	Something that sticks like glue GN=snama	Q9XZ21_DROME	0.1633	1	17	73	0.772727	-0.371969	0.172795	0.762469
Q9XZ57	Eb1, isoform E GN=Eb1	Q9XZ57_DROME	0.3448	3	9	49	2.38889	1.25634	0.0175637	1.75538
Q9XZ61	Ubiquitin carboxyl-terminal hydrolase GN=Uch-L5	Q9XZ61_DROME	0.3148	1	10	61	1.51515	0.599462	0.0350772	1.45498				1.45498
Q9XZ63	Mesencephalic astrocyte-derived neurotrophic factor homolog GN=Manf	ARMET_DROME	0.3468	1	7	52	1.83333	0.874469	0.004928	2.30733
Q9XZH6	V-type proton ATPase subunit G GN=Vha13	VATG_DROME	0.2051	1	2	40	1.88889	0.917538	0.00465921	2.33169
Q9XZJ4	Proteasome subunit alpha type-6 GN=Prosalpha1	PSA6_DROME	0.4385	1	11	112	1.63158	0.706269	0.0104017	1.98289				1.98289
Q9XZS3	Translation machinery-associated protein 7 homolog GN=CG13364	TMA7_DROME	0.2969	1	2	41	1.18519	0.245112	0.340528	0.467847
Q9XZU1	Exportin-2 GN=Cas	XPO2_DROME	0.1877	1	19	91	1.26316	0.337035	0.148704	0.827678
Q9Y091	Pre-mRNA-splicing regulator female-lethal(2)D GN=fl(2)d	FL2D_DROME	0.1847	2	9	61	1.02222	0.0317089	0.889194	0.0510034
Q9Y0I1	NuA4 complex subunit EAF3 homolog GN=MRG15	EAF3_DROME	0.2241	1	7	54	1.05128	0.0721498	0.842842	0.0742541
Q9Y0S9	Abelson interacting protein, isoform A GN=Abi	Q9Y0S9_DROME	0.186	1	9	57	1.25	0.321928	0.453253	0.343659
Q9Y0Y2	Adenylosuccinate synthetase GN=AdSS	PURA_DROME	0.2013	1	8	37	2.13333	1.09311	0.104907	0.979194
Q9Y0Y5	BcDNA.LD29885 GN=epsilonCOP	Q9Y0Y5_DROME	0.2418	1	7	42	4.33333	2.11548	0.00318021	2.49754												2.49754
Q9Y0Z1	BcDNA.LD23876 GN=BcDNA.LD23876	Q9Y0Z1_DROME	0.0724	1	9	23	3.5	1.80735	0.172795	0.762469
Q9Y102	BcDNA.GH11973 GN=rgn	Q9Y102_DROME	0.1675	2	14	56	1.36364	0.447459	0.343166	0.464495
Q9Y105	Probable glutamine--tRNA ligase GN=Aats-gln	SYQ_DROME	0.1967	1	14	63	1.16667	0.222392	0.524426	0.280316
Q9Y112	BcDNA.GH10614 GN=BcDNA.GH10614	Q9Y112_DROME	0.288	1	9	29	1.27778	0.353637	0.298842	0.524558
Q9Y114	BcDNA.GH10229 GN=BcDNA.GH10229	Q9Y114_DROME	0.0884	1	5	27	0.952381	-0.0703893	0.864094	0.0634389
Q9Y125	BcDNA.GH08312 GN=Sap-r	Q9Y125_DROME	0.1196	2	12	58	0.803922	-0.314873	0.298842	0.524558
Q9Y128	BcDNA.GH07688 GN=cert	Q9Y128_DROME	0.193	2	13	46	0.688889	-0.537657	0.0230656	1.63704
Q9Y134	L.2.35Df GN=l(2)35Df	Q9Y134_DROME	0.1773	1	17	64	1.44444	0.530515	0.331393	0.479656
Q9Y162	BcDNA.GH02678 GN=Vps4	Q9Y162_DROME	0.1312	1	6	37	2.13333	1.09311	0.226694	0.644561
X2J516	Adenosine 3, isoform C GN=ade3	X2J516_DROME	0.1264	3	16	82	1.18519	0.245112	0.580576	0.236141
X2J5X6	Loquacious, isoform F GN=loqs	X2J5X6_DROME	0.125	5	2	34	0.925926	-0.111031	0.724605	0.139899
X2J8V0	Nervous wreck, isoform H GN=nwk	X2J8V0_DROME	0.1869	3	1	93	0.958333	-0.0614005	0.767461	0.114944
X2J979	Synaptotagmin 1, isoform H GN=Syt1	X2J979_DROME	0.3996	4	1	124	0.958333	-0.0614005	0.809958	0.0915373
X2J9Z8	CG13366, isoform G GN=CG13366	X2J9Z8_DROME	0.1136	4	10	27	1.46667	0.552541	0.197473	0.704492
X2JAI4	Minichromosome maintenance 3, isoform B GN=Mcm3	X2JAI4_DROME	0.3117	2	20	77	1.5	0.584963	0.222343	0.652977
X2JC77	Nervous wreck, isoform K GN=nwk	X2JC77_DROME	0.1859	7	1	100	0.857143	-0.222392	0.207031	0.683964
X2JC83	Rho kinase, isoform B GN=Rok	X2JC83_DROME	0.113	4	16	44	0.794872	-0.331206	0.373771	0.427395
X2JCY4	Stoned B, isoform H GN=stnB	X2JCY4_DROME	0.17	2	17	113	1.11538	0.157541	0.439085	0.357452
X2JD88	CG43901, isoform C GN=CG43901	X2JD88_DROME	0.0573	3	9	38	1.77778	0.830075	0.0414941	1.38201
X2JDH2	CG7191, isoform B GN=CG7191	X2JDH2_DROME	0.1949	2	5	26	0.904762	-0.14439	0.724605	0.139899
X2JE07	CG1677, isoform D GN=CG1677	X2JE07_DROME	0.2122	2	17	135	1.16667	0.222392	0.000866343	3.06231
X2JE15	Shibire, isoform P GN=shi	X2JE15_DROME	0.3712	5	1	280	1.10256	0.140863	0.552968	0.2573
X2JEJ4	Phosphorylase kinase gamma, isoform F GN=PhKgamma	X2JEJ4_DROME	0.087	5	2	23	0.761905	-0.392317	0.494743	0.30562
X2JEU3	CG1737, isoform C GN=CG1737	X2JEU3_DROME	0.2565	2	19	56	1.36364	0.447459	0.474937	0.323364
X2JEX7	Ubiquitin carboxyl-terminal hydrolase GN=Usp7	X2JEX7_DROME	0.2062	2	24	121	1.21795	0.284453	0.12558	0.90108
X2JF83	CG8184, isoform G GN=CG8184	X2JF83_DROME	0.1017	7	41	149	0.940171	-0.089005	0.78991	0.102422
X2JFQ1	CG7358, isoform B GN=CG7358	X2JFQ1_DROME	0.0878	3	8	27	1.46667	0.552541	0.197473	0.704492
X2JFW6	CG8289, isoform B GN=CG8289	X2JFW6_DROME	0.2896	2	11	80	0.777778	-0.36257	0.238333	0.622817
X2JIM3	CG15894, isoform D GN=CG15894	X2JIM3_DROME	0.1386	4	12	56	1.36364	0.447459	0.0240082	1.61964
X2JJP5	Sec16 ortholog, isoform H GN=Sec16	X2JJP5_DROME	0.0557	6	10	47	0.871795	-0.197939	0.494743	0.30562
X2JLN4	Lethal (1) G0196, isoform L GN=l(1)G0196	X2JLN4_DROME	0.09	10	11	28	1	0	1	0

## Sheet: GO Associations
FOLD CHANGE UP
GO ID	GO Term	P-Value	# of genes	Gene names
15630	microtubule, cytoskeleton	2.12e-36	81	P08879, Q7KN62, Q9VZ23, Q9VQE0, P12613, Q24133, Q9V3J8, Q9VSA3, Q7JR58, Q9VL70, Q7K3J0, Q9VAJ2, P25007, Q7K2D2, Q9VHP0, Q9W1X4, P48605, P08841, P29843, Q7JRJ9, Q9VKZ8, Q3YMU0, Q9VV75, P08928, O18640, Q7KLV9, Q9W414, O77430, P02518, P02517, P02516, Q0KHZ6, Q9V5C6, P17917, Q9W3Y3, P26308, P07487, P40797, Q7JVI3, Q9Y0Y5, Q9W0S7, O44226, Q9VK69, Q9VN44, P29310, Q9V895, O76932, Q9V3P0, P52295, P11147,…
6457	protein, folding	5.2455e-16	27	Q9VGK3, P54399, Q9VK69, P29310, Q9VPQ2, P11147, P12613, Q9VXQ5, Q24133, Q9VUC1, Q9VTE5, P02828, Q7K3J0, Q9W392, P25007, Q9VL78, P48604, Q9VGP6, P48605, P29843, Q3YMU0, Q9VMH8, O77277, Q9VU35, Q9TVP3, Q9VW56, P02518
30529	ribonucleoprotein, complex	1.2853e-09	44	Q9VM49, Q9VLK1, Q9VCE3, Q9W0S7, P55841, Q9V597, P50535, P11147, Q9VQK7, Q9V3P3, Q27268, Q9VVU6, Q9VVI2, Q9VYQ9, P48809, P48149, Q9VBN5, P46222, Q9VHP0, P23128, Q9W1V3, Q9VFT4, Q94535, Q9U3Z7, Q95RE4, P50882, P31009, Q9VGP7, P49630, Q9V3W7, Q9VJ19, Q9W255, O18640, O44437, Q9V4Q8, Q9VWP1, Q7KMJ6, Q9VND7, P48810, Q94901, Q9VJY6, Q9W086, Q9VBU9, Q9VHS8
5681	spliceosomal, complex	6.8614e-07	21	Q9VM49, Q9U3Z7, Q95RE4, Q9V3W7, Q9W255, O18640, P11147, Q9VQK7, Q9V3P3, Q27268, O44437, Q9VVU6, Q9V4Q8, Q9VWP1, Q7KMJ6, Q9VND7, Q9VYQ9, Q94901, Q9VFT4, Q9VHS8, Q94535
7399	nervous, system, development	5.1531e-06	33	DSH_DROME, LAM0_DROME, GBB1_DROME, STAU_DROME, BRAT_DROME, FKB59_DROME, GNAQ_DROME, ENA_DROME, GROU_DROME, TBB3_DROME, PP12_DROME, 2ABA_DROME, DRK_DROME, ELAV_DROME, 41_DROME, HDAC1_DROME, TERA_DROME, HSP83_DROME, HSP7D_DROME, CADF_DROME, PUM_DROME, NH2L1_DROME, TYDP1_DROME, PNUT_DROME, DCE_DROME, PP2A_DROME, ARMET_DROME, 1433Z_DROME, SMD3_DROME, HOW_DROME, RB27C_DROME, CSN4_DROME, SPTCA_DROME
5643	nuclear, pore	9.3974e-06	8	A1Z8P9, Q7JXF5, Q9VRV8, Q9VN44, Q9V455, P52295, Q9W1X4, Q7K2X8
22626	cytosolic, ribosome	1.8371e-05	10	RL9_DROME, RL24_DROME, RL14_DROME, RL36_DROME, RSSA_DROME, RL11_DROME, RL31_DROME, RS15A_DROME, RS21_DROME, RS2_DROME
6974	response, to, DNA, damage, stimulus	0.00021163	12	PRDX1_DROME, PSA3_DROME, 1433E_DROME, PSA6_DROME, DDB1_DROME, PSA71_DROME, TYDP1_DROME, TRXR1_DROME, GSH1_DROME, IF4A_DROME, PCNA_DROME, PRS8_DROME
5759	mitochondrial, matrix	0.000391	15	Q9VGP7, P91929, Q7JXC4, Q9VU35, Q9VW68, Q9V9T5, Q9VSA3, Q7JR58, Q9VNX4, Q0KHZ6, Q00637, Q9V9E3, Q9W086, P48604, Q94522
6096	glycolysis	0.00064903	6	P52034, Q9VKX2, Q01604, P52029, P07487, Q9VAN7
33554	cellular, response, to, stress	0.00073666	13	SODM_DROME, PSA3_DROME, 1433E_DROME, DDB1_DROME, PSA71_DROME, TYDP1_DROME, PCNA_DROME, PRDX1_DROME, PSA6_DROME, TRXR1_DROME, GSH1_DROME, IF4A_DROME, PRS8_DROME
16192	vesicle-mediated, transport	0.0056269	16	HSP7D_DROME, CBPD_DROME, PNUT_DROME, TCPA_DROME, PFD2_DROME, SNAP_DROME, BRAT_DROME, PP2A_DROME, GELS_DROME, EXOC4_DROME, PP12_DROME, 2AAA_DROME, WDR1_DROME, NECAP_DROME, TMEDA_DROME, ATX2_DROME
1505	regulation, of, neurotransmitter, levels	0.0070429	10	P20228, Q23983, P13395, Q9U6R9, Q9W1I8, Q9VLB7, P11147, Q9VNH6, Q24253, P37236
42981	regulation, of, apoptosis	0.014872	6	RL14_DROME, VIAF1_DROME, PNUT_DROME, RIR1_DROME, SEPT1_DROME, API5_DROME
FOLD CHANGE DOWN
GO ID	GO Term	P-Value	# of genes	Gene names
15629	actin, cytoskeleton	2.6712e-07	6	MYSP1_DROME, TNNT_DROME, MY31D_DROME, MLR_DROME, TPM2_DROME, MY61F_DROME
5509	calcium, ion, binding	0.0039908	6	Q9V3V2, Q9VCR3, P91927, P14318, P18432, O61604
31175	neuron, projection, development	0.024356	6	Q9VMD9, P23654, Q05783, P10379, A1Z9I5, B7Z002
8556	potassium-transporting, ATPase, activity	0.0030945	2	Q24048, Q7JS69
15081	sodium, ion, transmembrane, transporter, activity	0.0025153	4	Q9VKC9, Q24048, Q7JS69, Q9V4E7
6350	transcription	0.0077959	3	TAF2_DROME, RTF1_DROME, T2FA_DROME
