# Supplementary material for: Traumatic injury compromises nucleocytoplasmic transport and leads to TDP-43 pathology
Source: eLife. 2021 Jun 1;10:e67587. doi: 10.7554/eLife.67587 (PMC8169113; doi:10.7554/eLife.67587)
Supplement: Supplementary file 3. [file elife-67587-supp3.xlsx]

## Sheet: Up 1.6-fold
GO-ID	Description	p-value	N	Protein names
9987	cellular process	4.4976e-26	276	P54611 Q9VM49 Q9V438 A0AQH0 Q9V436 Q24253 Q9VQM4 Q24133 Q95U54 Q9VSA3 O97182 Q7K3J0 Q9VE52 Q9VNX4 P48604 P48605 P08841 Q9VAN7 Q9VC18 Q7JRJ9 Q9VT32 Q9VV75 Q9VRP2 Q9V3S9 Q9VNH6 P36179 O77430 Q9XZJ4 Q7JN06 Q7K148 Q7K2G1 Q94901 A1Z9E3 Q9VLU0 P40797 Q8T0L3 P55841 Q9VGK3 Q9VMW9 Q9V455 Q8T4C4 Q7KNM2 Q9VU68 A1Z8P9 Q9VTE5 Q7KRU8 P48149 Q9VN95 P25822 P40304 P40423 Q9XYZ5 Q9V461 Q9V345 P91929 Q9VJ19 Q7JZF5 …
8152	metabolic process	6.9206e-16	214	P54611 Q9VM49 A0AQH0 Q9V436 Q9VQM4 Q24133 Q95U54 Q9VSA3 Q7K3J0 Q9VE52 Q9VNX4 P48604 P48605 Q9VAN7 Q9VC18 Q7JRJ9 Q9VT32 Q9VV75 Q9V3S9 P36179 Q9W414 O77430 Q9XZJ4 Q7K148 Q94901 A1Z9E3 Q8T0L3 P55841 Q9VGK3 Q9VMW9 Q8T4C4 Q7KNM2 Q9VTE5 Q7KRU8 P48149 Q9VN95 P25822 P40304 Q9XYZ5 Q9V461 Q9V345 P91929 Q9VJ19 Q7JZF5 Q9VMH8 P12881 Q9TVP3 Q7K126 Q7KMJ6 P08879 Q76NQ0 Q9W3K5 Q6AWN0 Q7JXZ2 O61613 P42787 Q9W0E4 …
44237	cellular metabolic process	1.642e-25	188	P54611 Q9VM49 Q9VLK1 P52034 Q9VKI8 A0AQH0 Q9VIE7 Q9VQM4 Q24133 Q95U54 Q9VSA3 Q7K3J0 Q9VE52 Q9VNX4 Q94517 P48604 P48605 Q9VAN7 Q9VC18 Q7JRJ9 Q9VKZ8 Q9VT32 O01404 Q9VV75 Q7K4B3 Q9W255 O18640 Q9V3S9 P36179 Q8MQJ9 O77277 O77430 Q9XZJ4 Q7K148 Q9VCK0 Q94901 A1Z9E3 Q9VJY6 P07487 Q8T0L3 Q9VBI2 P55841 Q9VGK3 Q9VMW9 Q9GU68 P11147 Q8T4C4 Q7KNM2 Q27268 B7YZQ7 P56538 Q9VTE5 Q9V7D2 P35122 Q9VJZ4 P48149 Q9VN95 …
44238	primary metabolic process	3.4108e-16	187	P54611 Q9VM49 Q9VLK1 P52034 Q7KN62 Q9VKI8 A0AQH0 Q9V436 Q9VIE7 Q9VQM4 Q24133 Q95U54 Q9VSA3 Q7K3J0 Q9VE52 Q9VNX4 Q94517 P48604 P48605 Q9VAN7 Q9VC18 Q7JRJ9 Q9VKZ8 Q9VT32 Q9VR79 O01404 Q9VV75 Q7K4B3 Q9W255 O18640 Q9V3S9 P36179 Q8MQJ9 O77277 Q9W414 O77430 Q9XZJ4 Q7K148 Q9VCK0 Q94901 A1Z9E3 Q9VJY6 P07487 Q8T0L3 Q9VBI2 P55841 Q9VGK3 Q9VMW9 Q9GU68 P11147 Q8T4C4 Q7KNM2 Q27268 B7YZQ7 P56538 Q9VTE5 Q9V7D2 …
44464	cell part	2.8464e-07	158	DDX3_DROME DDX17_DROME SODM_DROME 1433E_DROME IMA_DROME IMPE2_DROME LARK_DROME PSA5_DROME AN32A_DROME FKB59_DROME EDC3_DROME DDX6_DROME ENA_DROME DNAJ1_DROME GROU_DROME TBB3_DROME 2AAA_DROME 2ABA_DROME MSL1_DROME GNL3_DROME NELFA_DROME TRXR1_DROME GSH1_DROME TERA_DROME ATX2_DROME IF4A_DROME IDH3A_DROME IF5A_DROME TORS_DROME PNUT_DROME PP2A_DROME KPBB_DROME G6PI_DROME AMAL_DROME DCTN2_DROME SQH_DR…
5623	cell	2.8464e-07	158	DDX3_DROME DDX17_DROME SODM_DROME 1433E_DROME IMA_DROME IMPE2_DROME LARK_DROME PSA5_DROME AN32A_DROME FKB59_DROME EDC3_DROME DDX6_DROME ENA_DROME DNAJ1_DROME GROU_DROME TBB3_DROME 2AAA_DROME 2ABA_DROME MSL1_DROME GNL3_DROME NELFA_DROME TRXR1_DROME GSH1_DROME TERA_DROME ATX2_DROME IF4A_DROME IDH3A_DROME IF5A_DROME TORS_DROME PNUT_DROME PP2A_DROME KPBB_DROME G6PI_DROME AMAL_DROME DCTN2_DROME SQH_DR…
5622	intracellular	4.882e-17	151	DDX3_DROME DDX17_DROME SODM_DROME 1433E_DROME IMA_DROME IMPE2_DROME LARK_DROME PSA5_DROME AN32A_DROME EDC3_DROME DDX6_DROME DNAJ1_DROME GROU_DROME TBB3_DROME 2AAA_DROME 2ABA_DROME MSL1_DROME GNL3_DROME NELFA_DROME TRXR1_DROME GSH1_DROME TERA_DROME ATX2_DROME IF4A_DROME IDH3A_DROME IF5A_DROME TORS_DROME PNUT_DROME PP2A_DROME KPBB_DROME G6PI_DROME DCTN2_DROME SQH_DROME PDI_DROME RL11_DROME RL31_DRO…
44424	intracellular part	5.8698e-20	149	DDX3_DROME DDX17_DROME SODM_DROME 1433E_DROME IMA_DROME IMPE2_DROME LARK_DROME PSA5_DROME AN32A_DROME EDC3_DROME DDX6_DROME DNAJ1_DROME GROU_DROME TBB3_DROME 2AAA_DROME 2ABA_DROME MSL1_DROME GNL3_DROME NELFA_DROME TRXR1_DROME GSH1_DROME TERA_DROME ATX2_DROME IF4A_DROME IDH3A_DROME IF5A_DROME TORS_DROME PNUT_DROME PP2A_DROME KPBB_DROME G6PI_DROME DCTN2_DROME SQH_DROME PDI_DROME RL11_DROME RL31_DRO…
43170	macromolecule metabolic process	5.2166e-10	144	Q9VM49 Q9VLK1 Q7KN62 A0AQH0 Q9V436 Q9VIE7 Q9VQM4 Q24133 Q95U54 Q7K3J0 Q9VE52 Q94517 P48604 P48605 Q7JRJ9 Q9VKZ8 Q9VR79 Q9VV75 Q7K4B3 Q9W255 O18640 P36179 Q8MQJ9 O77277 Q9W414 O77430 Q9XZJ4 Q7K148 Q9VCK0 Q94901 A1Z9E3 Q9VJY6 Q8T0L3 P55841 Q9VGK3 Q9GU68 P11147 Q7KNM2 Q27268 B7YZQ7 P56538 Q9VTE5 P35122 P48149 P25822 Q9W392 Q9VVA7 Q9W1V3 P40304 Q9VJJ0 Q9XYZ5 Q95RE4 Q7KUA4 Q9V461 P49630 Q9V345 Q9VJ19 …
5488	binding	1.1866e-08	134	DDX3_DROME DDX17_DROME SODM_DROME 1433E_DROME IMA_DROME LARK_DROME AN32A_DROME FKB59_DROME DDX6_DROME ENA_DROME DNAJ1_DROME GROU_DROME TBB3_DROME 2AAA_DROME MSL1_DROME GNL3_DROME NELFA_DROME TRXR1_DROME GSH1_DROME TERA_DROME IF4A_DROME IDH3A_DROME IF5A_DROME RBP9X_DROME TORS_DROME PNUT_DROME DCE_DROME KPBB_DROME AMAL_DROME SQH_DROME RL11_DROME OB99B_DROME VATB_DROME TCPG_DROME JDP_DROME PYG_DROME…
44260	cellular macromolecule metabolic process	4.2861e-15	132	Q9VM49 Q9VLK1 A0AQH0 Q9VIE7 Q9VQM4 Q24133 Q95U54 Q7K3J0 Q9VE52 Q94517 P48604 P48605 Q7JRJ9 Q9VKZ8 Q7K4B3 Q9W255 O18640 P36179 Q8MQJ9 O77277 O77430 Q9XZJ4 Q7K148 Q9VCK0 Q94901 A1Z9E3 Q9VJY6 Q8T0L3 P55841 Q9VGK3 Q9GU68 P11147 Q7KNM2 Q27268 B7YZQ7 P56538 Q9VTE5 P35122 P48149 P25822 Q9W392 Q9VVA7 Q9W1V3 P40304 Q9VJJ0 Q9XYZ5 Q95RE4 Q7KUA4 Q9V461 P49630 Q9V345 Q9VJ19 Q7JZF5 Q9VIH1 Q9VMH8 P12881 Q9TVP3 …
43229	intracellular organelle	7.1633e-13	120	DDX3_DROME DDX17_DROME SODM_DROME 1433E_DROME IMA_DROME LARK_DROME AN32A_DROME EDC3_DROME DDX6_DROME DNAJ1_DROME GROU_DROME TBB3_DROME 2ABA_DROME MSL1_DROME GNL3_DROME NELFA_DROME TRXR1_DROME GSH1_DROME TERA_DROME IF4A_DROME IDH3A_DROME TORS_DROME PNUT_DROME DCTN2_DROME SQH_DROME PDI_DROME RL11_DROME RL31_DROME WDS_DROME VATB_DROME TCPG_DROME VATD1_DROME RL24_DROME PSA3_DROME GCSH_DROME RL14_DROM…
43226	organelle	7.9134e-13	120	DDX3_DROME DDX17_DROME SODM_DROME 1433E_DROME IMA_DROME LARK_DROME AN32A_DROME EDC3_DROME DDX6_DROME DNAJ1_DROME GROU_DROME TBB3_DROME 2ABA_DROME MSL1_DROME GNL3_DROME NELFA_DROME TRXR1_DROME GSH1_DROME TERA_DROME IF4A_DROME IDH3A_DROME TORS_DROME PNUT_DROME DCTN2_DROME SQH_DROME PDI_DROME RL11_DROME RL31_DROME WDS_DROME VATB_DROME TCPG_DROME VATD1_DROME RL24_DROME PSA3_DROME GCSH_DROME RL14_DROM…
32991	macromolecular complex	1.5599e-29	115	DDX3_DROME DDX17_DROME 1433E_DROME IMA_DROME LARK_DROME PSA5_DROME AN32A_DROME FKB59_DROME EDC3_DROME DDX6_DROME DNAJ1_DROME GROU_DROME TBB3_DROME 2AAA_DROME 2ABA_DROME MSL1_DROME NELFA_DROME TRXR1_DROME GSH1_DROME TERA_DROME IF4A_DROME IDH3A_DROME PNUT_DROME PP2A_DROME KPBB_DROME DCTN2_DROME SQH_DROME RL11_DROME RL31_DROME WDS_DROME VATB_DROME TCPG_DROME PYG_DROME VATD1_DROME RL24_DROME PSA3_DRO…
16043	cellular component organization	2.886e-09	108	Q7KN62 P50535 Q9V436 Q9VQE0 Q24253 Q9VIE7 O97182 Q7K3J0 Q94517 P48604 P48605 P08841 Q7JRJ9 Q7K4B3 P36179 Q8MQJ9 O77430 Q7JN06 Q7K148 Q7K2G1 Q94901 P26308 Q9VJY6 Q9VLU0 P40797 Q7JVI3 P55841 P52295 P11147 Q7KMS3 Q27268 B7YZQ7 A1Z995 Q9VU68 P56538 A1Z8P9 Q9VTE5 Q9VYG2 P48149 P25822 Q9W392 P23128 P40423 Q9VP57 Q9V461 Q8SWR8 Q9VJ19 Q24560 Q08012 Q23983 Q9VCU6 P92177 P61857 Q8MST5 P23257 P08879 P51140 …
44446	intracellular organelle part	2.8777e-21	103	DDX3_DROME DDX17_DROME SODM_DROME 1433E_DROME IMA_DROME LARK_DROME AN32A_DROME EDC3_DROME DDX6_DROME DNAJ1_DROME TBB3_DROME 2ABA_DROME MSL1_DROME GNL3_DROME NELFA_DROME TRXR1_DROME TERA_DROME IF4A_DROME IDH3A_DROME TORS_DROME PNUT_DROME DCTN2_DROME SQH_DROME PDI_DROME RL11_DROME RL31_DROME WDS_DROME VATB_DROME TCPG_DROME VATD1_DROME RL24_DROME PSA3_DROME RL14_DROME NU214_DROME DYLT_DROME ATPO_DRO…
44422	organelle part	4.4924e-21	103	DDX3_DROME DDX17_DROME SODM_DROME 1433E_DROME IMA_DROME LARK_DROME AN32A_DROME EDC3_DROME DDX6_DROME DNAJ1_DROME TBB3_DROME 2ABA_DROME MSL1_DROME GNL3_DROME NELFA_DROME TRXR1_DROME TERA_DROME IF4A_DROME IDH3A_DROME TORS_DROME PNUT_DROME DCTN2_DROME SQH_DROME PDI_DROME RL11_DROME RL31_DROME WDS_DROME VATB_DROME TCPG_DROME VATD1_DROME RL24_DROME PSA3_DROME RL14_DROME NU214_DROME DYLT_DROME ATPO_DRO…
19538	protein metabolic process	1.6814e-06	99	Q7KN62 A0AQH0 Q9V436 Q9VIE7 Q24133 Q7K3J0 Q94517 P48604 P48605 Q7JRJ9 Q9VKZ8 Q9VV75 P36179 O77277 Q9W414 O77430 Q9XZJ4 Q7K148 Q9VCK0 A1Z9E3 Q9VJY6 Q8T0L3 P55841 Q9VGK3 Q9GU68 P11147 Q7KNM2 P56538 Q9VTE5 P35122 P48149 Q9W392 Q9VVA7 P40304 Q9VJJ0 Q9XYZ5 Q7KUA4 P49630 Q9V345 Q9VJ19 Q9VMH8 P12881 Q9TVP3 O18413 P08879 Q76NQ0 Q9V597 Q9V3V6 P12613 O61613 P42787 Q9W0E4 Q7KSM5 P25007 P46222 Q9VL78 P29843 …
5737	cytoplasm	1.2385e-14	98	DDX3_DROME SODM_DROME 1433E_DROME IMA_DROME IMPE2_DROME LARK_DROME AN32A_DROME EDC3_DROME DDX6_DROME DNAJ1_DROME 2ABA_DROME TRXR1_DROME GSH1_DROME TERA_DROME ATX2_DROME IF4A_DROME IDH3A_DROME IF5A_DROME TORS_DROME PNUT_DROME PP2A_DROME KPBB_DROME G6PI_DROME SQH_DROME PDI_DROME RL11_DROME RL31_DROME VATB_DROME TCPG_DROME VATD1_DROME RL24_DROME GCSH_DROME RL14_DROME DSH_DROME PGK_DROME ATPO_DROME G…
43234	protein complex	6.4906e-26	94	DDX3_DROME DDX17_DROME 1433E_DROME IMA_DROME LAM0_DROME GBB1_DROME PSA5_DROME AN32A_DROME STAU_DROME FKB59_DROME EDC3_DROME PSB1_DROME EI3D1_DROME PSA1_DROME ELP2_DROME DDX6_DROME DNAJ1_DROME GROU_DROME TBB3_DROME 2AAA_DROME 2ABA_DROME UCHL_DROME NELFA_DROME HCD2_DROME NDKA_DROME TRXR1_DROME GSH1_DROME TERA_DROME EIF3M_DROME IF4A_DROME IDH3A_DROME HSP7D_DROME TBA1_DROME RAN_DROME ADRM1_DROME PFD3…
3824	catalytic activity	0.0013918	89	DDX3_DROME DDX17_DROME SODM_DROME GBB1_DROME PSA5_DROME PURA_DROME FKB59_DROME PSB1_DROME PSA1_DROME DDX6_DROME TBB3_DROME 2AAA_DROME 2ABA_DROME UCHL_DROME PHM_DROME HCD2_DROME NDKA_DROME TRXR1_DROME GSH1_DROME TERA_DROME EIF3M_DROME IF4A_DROME IDH3A_DROME HSP83_DROME GLNA1_DROME HSP7D_DROME TBA1_DROME RAN_DROME DCE_DROME TCPA_DROME MAAI2_DROME PP2A_DROME NMT_DROME KPBB_DROME G6PI_DROME HSP7A_DRO…
44267	cellular protein metabolic process	4.4108e-10	88	P08879 Q76NQ0 Q9V597 A0AQH0 P12613 Q9VIE7 Q24133 O61613 Q7KSM5 Q7K3J0 P25007 P46222 Q94517 Q9VL78 P48604 P48605 P29843 Q7JRJ9 Q9VKZ8 Q3YMU0 P31009 Q95083 Q9VUJ1 P36179 O77277 O77430 Q9VRL1 Q9VUR4 Q9VW56 P12982 Q9VH81 Q9XZJ4 Q7K148 P02518 Q9V5C6 Q9VCK0 A1Z9E3 Q9VJY6 Q9VBU9 Q8T0L3 Q9XZ61 P55841 Q9VGK3 P54399 Q9VK69 P29310 Q9GU68 O76932 Q9VPQ2 P11147 Q9VXQ5 Q7KNM2 P56538 Q9VFE9 Q9VUC1 Q9VTE5 P02828 …
5856	cytoskeleton	1.9353e-34	85	P08879 Q7KN62 Q9VZ23 Q9VQE0 P12613 Q24133 Q9V3J8 Q9VSA3 P13395 Q7JR58 Q9VL70 O97182 Q7K3J0 Q9VAJ2 P25007 Q7K2D2 Q9VHP0 Q9W1X4 P48605 P08841 P29843 Q7JRJ9 Q9VKZ8 Q3YMU0 Q9VV75 P08928 O18640 Q7KLV9 Q9W414 O77430 P02518 P02517 P02516 Q0KHZ6 Q9V5C6 P17917 Q9W3Y3 P26308 P07487 P40797 Q7JVI3 Q9Y0Y5 P54357 Q9W0S7 O44226 Q9VK69 Q9VN44 P29310 Q9V895 O76932 Q9V3P0 P52295 P11147 Q7KMS3 Q9VXQ5 Q27268 P54359 …
44430	cytoskeletal part	1.1269e-36	84	P08879 Q7KN62 Q9VZ23 Q9VQE0 P12613 Q24133 Q9V3J8 Q9VSA3 P13395 Q7JR58 Q9VL70 O97182 Q7K3J0 Q9VAJ2 P25007 Q7K2D2 Q9VHP0 Q9W1X4 P48605 P08841 P29843 Q7JRJ9 Q9VKZ8 Q3YMU0 Q9VV75 P08928 O18640 Q7KLV9 Q9W414 O77430 P02518 P02517 P02516 Q0KHZ6 Q9V5C6 P17917 Q9W3Y3 P26308 P07487 P40797 Q7JVI3 Q9Y0Y5 P54357 Q9W0S7 O44226 Q9VK69 Q9VN44 P29310 Q9V895 O76932 Q9V3P0 P52295 P11147 Q7KMS3 Q9VXQ5 Q27268 P54359 …
6807	nitrogen compound metabolic process	1.3486e-09	84	P54611 Q9VM49 P08879 Q9VLK1 Q9VCE3 Q9VTW1 Q9VKI8 Q6AWN0 Q9VIE7 Q9VQM4 Q7JXZ2 Q95U54 Q9V3F8 Q9VE52 Q9VYQ9 P48809 Q9VNX4 P20232 Q9VFT4 P20477 Q9VC18 P49735 Q9U3Z7 Q9VT32 Q9VR79 O01404 Q7K4B3 Q9VW53 P31409 Q9V3W7 Q9W255 O18640 Q8MQJ9 O77430 Q9V4Q8 Q8T079 Q9VND7 P17917 Q94901 Q9VGW6 Q9Y0Y2 Q9VRD9 Q9VBI2 P48591 Q9VMW9 P29310 Q9VHA2 P11147 Q9VQK7 Q9V3P3 Q8T4C4 Q27268 B7YZQ7 Q9W3U9 Q9VVU6 Q9VW68 Q9V9T5 …
34641	cellular nitrogen compound metabolic process	7.6606e-12	83	P54611 Q9VM49 P08879 Q9VLK1 Q9VCE3 Q9VTW1 Q9VKI8 Q6AWN0 Q9VIE7 Q9VQM4 Q7JXZ2 Q95U54 Q9V3F8 Q9VE52 Q9VYQ9 P48809 Q9VNX4 P20232 Q9VFT4 P20477 Q9VC18 P49735 Q9U3Z7 Q9VT32 O01404 Q7K4B3 Q9VW53 P31409 Q9V3W7 Q9W255 O18640 Q8MQJ9 O77430 Q9V4Q8 Q8T079 Q9VND7 P17917 Q94901 Q9VGW6 Q9Y0Y2 Q9VRD9 Q9VBI2 P48591 Q9VMW9 P29310 Q9VHA2 P11147 Q9VQK7 Q9V3P3 Q8T4C4 Q27268 B7YZQ7 Q9W3U9 Q9VVU6 Q9VW68 Q9V9T5 Q9V7D2 …
15630	microtubule cytoskeleton	3.1038e-38	81	P08879 Q7KN62 Q9VZ23 Q9VQE0 P12613 Q24133 Q9V3J8 Q9VSA3 Q7JR58 Q9VL70 Q7K3J0 Q9VAJ2 P25007 Q7K2D2 Q9VHP0 Q9W1X4 P48605 P08841 P29843 Q7JRJ9 Q9VKZ8 Q3YMU0 Q9VV75 P08928 O18640 Q7KLV9 Q9W414 O77430 P02518 P02517 P02516 Q0KHZ6 Q9V5C6 P17917 Q9W3Y3 P26308 P07487 P40797 Q7JVI3 Q9Y0Y5 Q9W0S7 O44226 Q9VK69 Q9VN44 P29310 Q9V895 O76932 Q9V3P0 P52295 P11147 Q7KMS3 Q9VXQ5 Q27268 P54359 A1Z8P9 Q7KRU8 P02828 …
32501	multicellular organismal process	2.7801e-05	81	DDX3_DROME SODM_DROME 1433E_DROME IMA_DROME LAM0_DROME GBB1_DROME IMPE2_DROME LARK_DROME STAU_DROME BRAT_DROME FKB59_DROME OB99A_DROME ENA_DROME GROU_DROME TBB3_DROME 2ABA_DROME PHM_DROME SQD_DROME HCD2_DROME NDKA_DROME TRXR1_DROME TERA_DROME ATX2_DROME IF4A_DROME IF5A_DROME HSP83_DROME HSP7D_DROME RBP9X_DROME MO25_DROME PUM_DROME NH2L1_DROME HTS_DROME PNUT_DROME DCE_DROME PCNA_DROME PP2A_DROME N…
5634	nucleus	0.0026969	80	Q9VM49 Q9VLK1 Q9VCE3 Q8MT06 P50535 Q9VZ23 Q9W3K5 Q9VQM4 Q7K2X8 Q7KSM5 Q9W1G7 Q9VE52 Q9VYQ9 P48809 Q9VAJ2 P25007 P20232 Q9W1X4 Q9VFT4 Q94517 P49735 Q9U3Z7 Q9VW53 P08928 Q86NP2 Q9V3W7 Q9W255 O18640 Q9VYV4 Q9V4Q8 Q9VH81 Q8MRC7 Q7JN06 Q7K2G1 Q9VND7 Q94901 Q9VDQ3 Q9VGW6 Q9VLU0 O44226 Q9VN44 P29310 Q9V455 Q9V895 O76932 P52295 P11147 Q9VQK7 Q9V3P3 Q7KNM2 Q27268 B7YZQ7 A1Z995 Q9VVU6 A1Z8P9 Q9VYG2 Q8SX89 …
43228	non-membrane-bounded organelle	3.6714e-23	79	DDX3_DROME DDX17_DROME 1433E_DROME IMA_DROME LAM0_DROME GBB1_DROME AN32A_DROME STAU_DROME EDC3_DROME PSA1_DROME DDX6_DROME DNAJ1_DROME TBB3_DROME 2ABA_DROME UCHL_DROME MSL1_DROME GNL3_DROME SQD_DROME HCD2_DROME NDKA_DROME TRXR1_DROME TERA_DROME EIF3M_DROME IF4A_DROME IDH3A_DROME HSP83_DROME HSP7D_DROME TBA1_DROME RAN_DROME RS15A_DROME HTS_DROME PNUT_DROME EF1D_DROME TCPA_DROME PCNA_DROME 1433Z_DR…
43232	intracellular non-membrane-bounded organelle	3.6714e-23	79	DDX3_DROME DDX17_DROME 1433E_DROME IMA_DROME LAM0_DROME GBB1_DROME AN32A_DROME STAU_DROME EDC3_DROME PSA1_DROME DDX6_DROME DNAJ1_DROME TBB3_DROME 2ABA_DROME UCHL_DROME MSL1_DROME GNL3_DROME SQD_DROME HCD2_DROME NDKA_DROME TRXR1_DROME TERA_DROME EIF3M_DROME IF4A_DROME IDH3A_DROME HSP83_DROME HSP7D_DROME TBA1_DROME RAN_DROME RS15A_DROME HTS_DROME PNUT_DROME EF1D_DROME TCPA_DROME PCNA_DROME 1433Z_DR…
44444	cytoplasmic part	1.9494e-10	76	DDX3_DROME SODM_DROME IMA_DROME LAM0_DROME AN32A_DROME STAU_DROME EDC3_DROME EI3D1_DROME DDX6_DROME HCD2_DROME TRXR1_DROME GSH1_DROME TERA_DROME EIF3M_DROME IF4A_DROME IDH3A_DROME IF5A_DROME HSP83_DROME GLNA1_DROME HSP7D_DROME RAN_DROME PFD3_DROME TORS_DROME RS15A_DROME HTS_DROME PNUT_DROME EF1D_DROME TCPA_DROME KPBB_DROME GELS_DROME G6PI_DROME HSP7A_DROME PDI_DROME NECAP_DROME RL11_DROME RL31_DR…
32502	developmental process	1.5003e-07	75	DDX3_DROME SODM_DROME 1433E_DROME IMA_DROME LAM0_DROME GBB1_DROME IMPE2_DROME LARK_DROME STAU_DROME BRAT_DROME FKB59_DROME ENA_DROME GROU_DROME TBB3_DROME 2ABA_DROME SQD_DROME HCD2_DROME NDKA_DROME TRXR1_DROME TERA_DROME ATX2_DROME IF4A_DROME IF5A_DROME HSP83_DROME HSP7D_DROME RBP9X_DROME MO25_DROME PUM_DROME NH2L1_DROME HTS_DROME PNUT_DROME DCE_DROME PCNA_DROME PP2A_DROME NMT_DROME 1433Z_DROME S…
6996	organelle organization	1.6934e-09	73	P08879 Q9V597 Q7KN62 Q9VZ23 Q9V436 Q9VQE0 P12613 Q24253 Q9VIE7 P13395 O97182 Q7K3J0 Q9W1G7 Q9VYQ9 Q9VAJ2 P46222 Q7K2D2 Q94517 P48604 P48605 Q7JRJ9 P49735 P08928 O97428 P36179 O77430 Q9V4Q8 P12982 Q7JN06 Q7K148 P17917 Q94901 P26308 Q9VJY6 Q9VGW6 Q9VLU0 P40797 Q7JVI3 P55841 Q9VK69 P29310 Q9VXQ5 Q27268 B7YZQ7 Q9VU68 P56538 A1Z8P9 Q9V8R9 P02828 A8DZ29 P48149 P25822 Q9VBN5 Q9W392 Q8SX89 Q94535 Q9VP57 …
166	nucleotide binding	1.3478e-08	72	Q9VM49 P08879 Q9VCE3 Q8MT06 Q9V3V6 Q7KN62 Q9VKI8 Q9VZ23 Q9VQE0 P12613 Q9VMI3 Q9VIE7 Q9VSA3 Q7K3J0 Q9VE52 P48809 Q8SWU7 Q9VHP0 Q9VFT4 P48604 P48605 P08841 P29843 P49735 P31409 Q9V3W7 O77277 Q9W414 Q9VND7 Q94901 A1Z9E3 Q9VGW6 Q9Y0Y2 P07487 P40797 Q8T0L3 Q9VBI2 P48591 Q9VK69 Q7KN85 P11147 Q9VXQ5 Q8T4C4 Q27268 P54359 Q9V9T5 Q9VUC1 P02828 Q9VNV3 Q9W392 P23128 P42207 Q94535 Q7KUA4 P06603 Q9V461 Q9VGH5 …
5875	microtubule associated complex	3.9765e-33	69	P08879 Q7KN62 Q9VZ23 Q9VQE0 P12613 Q24133 Q9V3J8 Q9VSA3 Q7JR58 Q9VL70 Q7K3J0 Q9VAJ2 P25007 Q7K2D2 Q9VHP0 Q9W1X4 P48605 P29843 Q9VKZ8 Q3YMU0 Q9VV75 P08928 O18640 Q7KLV9 Q9W414 O77430 P02518 P02517 P02516 Q0KHZ6 Q9V5C6 P17917 Q9W3Y3 P26308 P07487 P40797 Q7JVI3 Q9Y0Y5 Q9W0S7 O44226 Q9VK69 Q9VN44 P29310 Q9V895 Q9V3P0 P52295 P11147 Q7KMS3 Q9VXQ5 Q27268 P54359 Q7KRU8 P35122 Q9VVI2 Q9W392 O18404 P23128 …
9058	biosynthetic process	4.835e-05	69	P54611 P08879 Q76NQ0 Q9VTW1 Q9V597 Q9VKI8 Q9W3K5 Q6AWN0 Q9VIE7 O61613 Q9V3F8 Q9VNX4 P46222 P20232 B7Z001 P20477 Q9VC18 P49735 Q9VT32 Q7K4B3 P31009 P31409 Q8MQJ9 O77430 P17917 Q9VCK0 A1Z9E3 Q9VJY6 Q9VBU9 Q9VGW6 Q9Y0Y2 Q9VRD9 P55841 P48591 Q7KN85 Q9VMW9 P29310 Q9GU68 Q9VHA2 Q8T4C4 B7YZQ7 Q9W3U9 P56538 Q9VFE9 Q9V7D2 A8DZ29 P48149 Q9VN95 Q9VBN5 Q9VEP6 Q9VL18 P50882 Q9V461 Q9VGP7 P49630 Q9W2X6 Q9VJ19 …
44249	cellular biosynthetic process	2.0352e-05	68	P54611 P08879 Q76NQ0 Q9VTW1 Q9V597 Q9VKI8 Q9W3K5 Q6AWN0 Q9VIE7 O61613 Q9V3F8 Q9VNX4 P46222 P20232 P20477 Q9VC18 P49735 Q9VT32 Q7K4B3 P31009 P31409 Q8MQJ9 O77430 P17917 Q9VCK0 A1Z9E3 Q9VJY6 Q9VBU9 Q9VGW6 Q9Y0Y2 Q9VRD9 P55841 P48591 Q7KN85 Q9VMW9 P29310 Q9GU68 Q9VHA2 Q8T4C4 B7YZQ7 Q9W3U9 P56538 Q9VFE9 Q9V7D2 A8DZ29 P48149 Q9VN95 Q9VBN5 Q9VEP6 Q9VL18 P50882 Q9V461 Q9VGP7 P49630 Q9W2X6 Q9VJ19 Q7JZF5 …
65007	biological regulation	0.00030076	68	DDX3_DROME DDX17_DROME TFS2_DROME 1433E_DROME LAM0_DROME LARK_DROME STAU_DROME BRAT_DROME FKB59_DROME ENA_DROME GROU_DROME 2ABA_DROME MSL1_DROME GNL3_DROME SQD_DROME NELFA_DROME HCD2_DROME TRXR1_DROME TERA_DROME ATX2_DROME IF4A_DROME IF5A_DROME HSP83_DROME HSP7D_DROME RBP9X_DROME TBA1_DROME PUM_DROME RAN_DROME PNUT_DROME DCE_DROME PCNA_DROME PP2A_DROME 1433Z_DROME SQH_DROME PDI_DROME CTBP_DROME C…
6139	nucleobase, nucleoside, nucleotide and nucleic acid metabolic process	9.2679e-08	66	P54611 Q9VM49 P08879 Q9VLK1 Q9VCE3 Q9VIE7 Q9VQM4 Q95U54 Q9VE52 Q9VYQ9 P48809 P20232 Q9VFT4 Q9VC18 P49735 Q9U3Z7 Q9VT32 Q7K4B3 Q9VW53 P31409 Q9V3W7 Q9W255 O18640 Q8MQJ9 O77430 Q9V4Q8 Q8T079 Q9VND7 P17917 Q94901 Q9VGW6 Q9Y0Y2 Q9VBI2 P48591 Q9VMW9 P11147 Q9VQK7 Q9V3P3 Q8T4C4 Q27268 B7YZQ7 Q9W3U9 Q9VVU6 Q9V7D2 A8DZ29 P25822 Q9VNV3 Q9W1V3 Q9VEP6 Q94535 Q9XYZ5 Q95RE4 Q9V461 Q9W2X6 P91929 Q7JZF5 Q9VIH1 …
5515	protein binding	2.5575e-10	65	DDX17_DROME TFS2_DROME 1433E_DROME DDB1_DROME LAM0_DROME JUPIT_DROME AN32A_DROME STAU_DROME BRAT_DROME FKB59_DROME ENA_DROME DNAJ1_DROME GROU_DROME MSL1_DROME NDKA_DROME TRXR1_DROME GSH1_DROME HSP83_DROME HSP7D_DROME RBP9X_DROME PUM_DROME RAN_DROME PFD3_DROME TORS_DROME HTS_DROME PNUT_DROME TCPA_DROME KPBB_DROME 1433Z_DROME GELS_DROME HSP7A_DROME SQH_DROME NECAP_DROME RL11_DROME CTBP_DROME ANX10_…
48856	anatomical structure development	9.6546e-07	65	DDX3_DROME 1433E_DROME IMA_DROME LAM0_DROME GBB1_DROME IMPE2_DROME STAU_DROME BRAT_DROME FKB59_DROME ENA_DROME GROU_DROME TBB3_DROME 2ABA_DROME SQD_DROME NDKA_DROME TERA_DROME ATX2_DROME IF4A_DROME IF5A_DROME HSP83_DROME HSP7D_DROME RBP9X_DROME PUM_DROME NH2L1_DROME HTS_DROME PNUT_DROME DCE_DROME PCNA_DROME PP2A_DROME NMT_DROME 1433Z_DROME SQH_DROME CTBP_DROME OB99B_DROME CSN4_DROME TBB2_DROME SP…
50789	regulation of biological process	0.0011363	60	DDX3_DROME DDX17_DROME TFS2_DROME 1433E_DROME LAM0_DROME LARK_DROME STAU_DROME BRAT_DROME FKB59_DROME ENA_DROME GROU_DROME 2ABA_DROME MSL1_DROME GNL3_DROME SQD_DROME NELFA_DROME TRXR1_DROME TERA_DROME ATX2_DROME IF4A_DROME IF5A_DROME HSP83_DROME HSP7D_DROME TBA1_DROME PUM_DROME RAN_DROME PNUT_DROME PCNA_DROME PP2A_DROME 1433Z_DROME SQH_DROME PDI_DROME CTBP_DROME CSN4_DROME SPTCA_DROME RL14_DROME …
17076	purine nucleotide binding	1.5286e-06	57	P08879 Q8MT06 Q9V3V6 Q7KN62 Q9VZ23 Q9VQE0 P12613 Q9VIE7 Q9VSA3 Q7K3J0 Q8SWU7 Q9VHP0 P48604 P48605 P08841 P29843 P49735 P31409 O77277 Q9W414 A1Z9E3 Q9VGW6 Q9Y0Y2 P40797 Q8T0L3 Q9VBI2 P48591 Q9VK69 Q7KN85 P11147 Q9VXQ5 Q8T4C4 Q27268 P54359 Q9V9T5 Q9VUC1 P02828 Q9VNV3 Q9W392 P23128 P42207 Q7KUA4 P06603 Q9V461 P06604 P91929 Q9VQL1 P32234 Q9VU35 Q24560 Q9VK85 O18413 P61857 Q02748 Q9VHS8 Q8MST5 P23257
10467	gene expression	0.00031657	56	Q9VM49 Q9VLK1 Q9VCE3 Q9V597 Q9VE52 Q9VYQ9 P48809 P46222 P20232 Q9VFT4 Q9U3Z7 Q7K4B3 P31009 Q9VW53 Q9V3W7 Q9W255 O18640 Q8MQJ9 Q9V4Q8 Q9VND7 Q9VCK0 Q94901 A1Z9E3 Q9VJY6 Q9VBU9 P55841 Q9GU68 P11147 Q9VQK7 Q9V3P3 Q27268 B7YZQ7 Q9VVU6 P56538 A8DZ29 P48149 Q9VBN5 Q9VNV3 Q9W1V3 Q94535 Q9VL18 Q95RE4 P50882 Q9VGP7 P49630 Q9VJ19 Q7JZF5 Q9VQL1 O44437 Q9VWP1 Q7K126 Q7KMJ6 Q9VK85 Q02748 Q9VHS8 Q9W2D9
48731	system development	6.4489e-07	55	1433E_DROME IMA_DROME LAM0_DROME GBB1_DROME IMPE2_DROME STAU_DROME BRAT_DROME FKB59_DROME ENA_DROME GROU_DROME TBB3_DROME 2ABA_DROME SQD_DROME NDKA_DROME TERA_DROME ATX2_DROME IF4A_DROME IF5A_DROME HSP83_DROME HSP7D_DROME PUM_DROME NH2L1_DROME PNUT_DROME DCE_DROME PP2A_DROME NMT_DROME 1433Z_DROME SQH_DROME CTBP_DROME OB99B_DROME CSN4_DROME TBB2_DROME SPTCA_DROME DSH_DROME CBPD_DROME GNAQ_DROME PP…
32553	ribonucleotide binding	7.3309e-07	55	P08879 Q8MT06 Q9V3V6 Q7KN62 Q9VZ23 Q9VQE0 P12613 Q9VIE7 Q7K3J0 Q8SWU7 Q9VHP0 P48605 P08841 P29843 P49735 P31409 O77277 Q9W414 A1Z9E3 Q9VGW6 Q9Y0Y2 P40797 Q8T0L3 Q9VBI2 P48591 Q9VK69 Q7KN85 P11147 Q9VXQ5 Q8T4C4 Q27268 P54359 Q9V9T5 Q9VUC1 P02828 Q9VNV3 Q9W392 P23128 P42207 Q7KUA4 P06603 Q9V461 P06604 P91929 Q9VQL1 P32234 Q9VU35 Q24560 Q9VK85 O18413 P61857 Q02748 Q9VHS8 Q8MST5 P23257
32555	purine ribonucleotide binding	7.3309e-07	55	P08879 Q8MT06 Q9V3V6 Q7KN62 Q9VZ23 Q9VQE0 P12613 Q9VIE7 Q7K3J0 Q8SWU7 Q9VHP0 P48605 P08841 P29843 P49735 P31409 O77277 Q9W414 A1Z9E3 Q9VGW6 Q9Y0Y2 P40797 Q8T0L3 Q9VBI2 P48591 Q9VK69 Q7KN85 P11147 Q9VXQ5 Q8T4C4 Q27268 P54359 Q9V9T5 Q9VUC1 P02828 Q9VNV3 Q9W392 P23128 P42207 Q7KUA4 P06603 Q9V461 P06604 P91929 Q9VQL1 P32234 Q9VU35 Q24560 Q9VK85 O18413 P61857 Q02748 Q9VHS8 Q8MST5 P23257
50794	regulation of cellular process	0.0015203	55	DDX17_DROME TFS2_DROME 1433E_DROME LAM0_DROME STAU_DROME BRAT_DROME ENA_DROME GROU_DROME 2ABA_DROME GNL3_DROME SQD_DROME NELFA_DROME TRXR1_DROME TERA_DROME ATX2_DROME IF4A_DROME IF5A_DROME HSP83_DROME TBA1_DROME PUM_DROME RAN_DROME PNUT_DROME PCNA_DROME PP2A_DROME 1433Z_DROME SQH_DROME PDI_DROME CTBP_DROME CSN4_DROME SPTCA_DROME RL14_DROME DSH_DROME ROA1_DROME RIR1_DROME GNAQ_DROME PRDX1_DROME TB…
16787	hydrolase activity	0.00014144	53	DDX3_DROME DDX17_DROME GBB1_DROME PSA5_DROME PSB1_DROME PSA1_DROME DDX6_DROME TBB3_DROME 2AAA_DROME 2ABA_DROME UCHL_DROME TERA_DROME IF4A_DROME HSP83_DROME HSP7D_DROME TBA1_DROME RAN_DROME TCPA_DROME PP2A_DROME KPBB_DROME HSP7A_DROME SQH_DROME VATB_DROME TCPG_DROME TBB2_DROME VATD1_DROME PSA3_DROME PREP_DROME DYLT_DROME MLC2_DROME PSA71_DROME CBPD_DROME ATPO_DROME VATE_DROME GNAQ_DROME TBG1_DROME…
44281	small molecule metabolic process	1.0264e-07	51	P54611 P08879 P52034 Q9VTW1 Q9VKI8 Q9W3K5 Q6AWN0 Q9VIE7 Q7JXZ2 Q9VSA3 Q7JR58 Q9VL70 Q9V3F8 Q9VNX4 Q01604 P20477 Q9VAN7 Q9VC18 Q9VT32 O01404 P31409 Q9V3S9 Q8T079 Q9Y0Y2 P07487 Q9VRD9 Q7KN85 Q9VMW9 P29310 Q27580 Q9GU68 Q9VHA2 Q8T4C4 Q9W3U9 Q9VW68 Q9V9T5 Q9VKX2 Q9V7D2 Q9VN95 O18404 Q9VEP6 Q9W2X6 Q9VQL1 P52029 Q9U616 Q9V3I1 P20228 B7Z0X1 Q9XTL9 Q24439 Q9VLS1
7049	cell cycle	2.6453e-09	50	P08879 Q9V597 Q9VZ23 Q9V436 P12613 O97182 Q7K3J0 Q9VAJ2 P46222 Q7K2D2 P48605 Q7JRJ9 P08928 P36179 O77430 Q9V4Q8 P12982 Q9VH81 Q7K148 P17917 Q9VJY6 Q9VGW6 P40797 P55841 Q9VK69 P29310 O76932 Q9VXQ5 Q7KNM2 Q27268 P54359 A1Z8P9 P02828 A8DZ29 P48149 P25822 Q9VBN5 Q9W392 P42207 Q94535 Q9VP57 P06603 P50882 P06604 P45594 Q9VJ19 O44437 Q02748 P23696 P23257
51179	localization	0.0035644	49	IMA_DROME LAM0_DROME GBB1_DROME LARK_DROME AN32A_DROME STAU_DROME BRAT_DROME OB99A_DROME ENA_DROME 2AAA_DROME SQD_DROME NDKA_DROME TERA_DROME VACHT_DROME ATX2_DROME HSP83_DROME HSP7D_DROME PUM_DROME RAN_DROME HTS_DROME PNUT_DROME TCPA_DROME PP2A_DROME GELS_DROME DCTN2_DROME SQH_DROME NECAP_DROME OB99B_DROME VATB_DROME SPTCA_DROME VATD1_DROME DSH_DROME NU214_DROME CBPD_DROME ATPO_DROME VATE_DROME …
5811	lipid particle	4.2108e-23	48	Q9W0S7 P55841 P54399 Q9W5W8 Q9VK69 Q7KN85 Q7KN62 P52295 Q9V438 P11147 Q9VZ23 Q9VXQ5 Q8T4C4 Q7K2P3 Q9VSA3 P13395 Q7JR58 Q9VL70 P02828 Q9VKX2 P48149 Q9W392 P46222 O18404 Q9VHP0 Q8SX89 Q9VFT4 B7Z001 P20477 P29843 Q3YMU0 Q9VV75 P31009 P49630 Q9W2X6 P08928 P91929 P52029 Q9VU35 Q9VYR1 Q9VMB9 Q24439 Q9I7D3 Q0KHZ6 Q9VJY6 Q9VBU9 Q9VZF9 P07487
90304	nucleic acid metabolic process	6.6614e-05	48	Q9VM49 Q9VLK1 Q9VCE3 P48591 P11147 Q9VQK7 Q9V3P3 Q27268 B7YZQ7 Q9VVU6 Q9VQM4 Q95U54 A8DZ29 Q9VE52 Q9VYQ9 P48809 P25822 Q9VNV3 P20232 Q9W1V3 Q9VFT4 P49735 Q94535 Q9U3Z7 Q9XYZ5 Q95RE4 Q9V461 Q7K4B3 Q9VW53 Q9V3W7 Q7JZF5 Q9W255 Q9VIH1 O18640 Q8MQJ9 Q9VQL1 O44437 O77430 Q9V4Q8 Q9VWP1 Q7K126 Q7KMJ6 Q9VND7 P17917 Q94901 Q9VGW6 Q02748 Q9VHS8
16817	hydrolase activity, acting on acid anhydrides	6.9824e-09	46	P54611 P54357 Q9VK69 Q9V3V6 Q7KN62 P11147 Q9VZ23 Q9VQE0 Q7KMS3 P12613 Q9VXQ5 Q8T4C4 Q27268 B7YZQ7 P54359 P02828 Q9V7D2 Q7K3J0 Q9VNV3 Q9VHP0 P23128 P42207 P48605 P40423 P08841 P29843 P06603 Q9W2X6 P06604 P31409 Q9W414 Q24560 Q9V3I1 Q9VB64 Q24439 Q9VK85 P26308 A1Z9E3 O18413 P61857 Q02748 Q9VHS8 Q9XZH6 Q8MST5 P23257 Q94524
16818	hydrolase activity, acting on acid anhydrides, in phosphorus-containing anhydrides	6.9824e-09	46	P54611 P54357 Q9VK69 Q9V3V6 Q7KN62 P11147 Q9VZ23 Q9VQE0 Q7KMS3 P12613 Q9VXQ5 Q8T4C4 Q27268 B7YZQ7 P54359 P02828 Q9V7D2 Q7K3J0 Q9VNV3 Q9VHP0 P23128 P42207 P48605 P40423 P08841 P29843 P06603 Q9W2X6 P06604 P31409 Q9W414 Q24560 Q9V3I1 Q9VB64 Q24439 Q9VK85 P26308 A1Z9E3 O18413 P61857 Q02748 Q9VHS8 Q9XZH6 Q8MST5 P23257 Q94524
30529	ribonucleoprotein complex	1.2853e-09	44	Q9VM49 Q9VLK1 Q9VCE3 Q9W0S7 P55841 Q9V597 P50535 P11147 Q9VQK7 Q9V3P3 Q27268 Q9VVU6 Q9VVI2 Q9VYQ9 P48809 P48149 Q9VBN5 P46222 Q9VHP0 P23128 Q9W1V3 Q9VFT4 Q94535 Q9U3Z7 Q95RE4 P50882 P31009 Q9VGP7 P49630 Q9V3W7 Q9VJ19 Q9W255 O18640 O44437 Q9V4Q8 Q9VWP1 Q7KMJ6 Q9VND7 P48810 Q94901 Q9VJY6 Q9W086 Q9VBU9 Q9VHS8
22402	cell cycle process	7.1931e-08	44	P08879 P55841 Q9VK69 O76932 Q9V597 Q9V436 P12613 Q9VXQ5 Q7KNM2 Q27268 A1Z8P9 P02828 A8DZ29 O97182 Q7K3J0 P48149 P25822 Q9VAJ2 Q9VBN5 Q9W392 P46222 Q7K2D2 P48605 Q7JRJ9 Q94535 P06603 P50882 P08928 P06604 P45594 Q9VJ19 P36179 O44437 O77430 Q9V4Q8 P12982 Q7K148 P17917 Q9VJY6 Q9VGW6 Q02748 P40797 P23696 P23257
30154	cell differentiation	9.8741e-07	44	DDX3_DROME 1433E_DROME IMA_DROME DSH_DROME DYLT_DROME GBB1_DROME STAU_DROME BRAT_DROME GNAQ_DROME ENA_DROME GROU_DROME TBB3_DROME PP12_DROME WDR1_DROME 2ABA_DROME DRK_DROME SQD_DROME 41_DROME HDAC1_DROME FREQ_DROME TMEDA_DROME TERA_DROME ATX2_DROME IF4A_DROME HSP83_DROME HSP7D_DROME RBP9X_DROME CADF_DROME PUM_DROME RB97D_DROME HTS_DROME PNUT_DROME DCE_DROME PCNA_DROME PP2A_DROME ARMET_DROME 1433Z…
48869	cellular developmental process	2.881e-06	44	DDX3_DROME 1433E_DROME IMA_DROME DSH_DROME DYLT_DROME GBB1_DROME STAU_DROME BRAT_DROME GNAQ_DROME ENA_DROME GROU_DROME TBB3_DROME PP12_DROME WDR1_DROME 2ABA_DROME DRK_DROME SQD_DROME 41_DROME HDAC1_DROME FREQ_DROME TMEDA_DROME TERA_DROME ATX2_DROME IF4A_DROME HSP83_DROME HSP7D_DROME RBP9X_DROME CADF_DROME PUM_DROME RB97D_DROME HTS_DROME PNUT_DROME DCE_DROME PCNA_DROME PP2A_DROME ARMET_DROME 1433Z…
9653	anatomical structure morphogenesis	0.00033208	43	1433E_DROME IMA_DROME DSH_DROME LAM0_DROME CBPD_DROME IMPE2_DROME BRAT_DROME GNAQ_DROME ENA_DROME GROU_DROME TBB3_DROME PP12_DROME WDR1_DROME DRK_DROME SQD_DROME 41_DROME HDAC1_DROME SEPT2_DROME NDKA_DROME TERA_DROME IF5A_DROME HSP83_DROME HSP7D_DROME RBP9X_DROME CADF_DROME PUM_DROME HTS_DROME PNUT_DROME SNAP_DROME PCNA_DROME PP2A_DROME NMT_DROME 1433Z_DROME HOW_DROME PPIA_DROME SQH_DROME MCM6_DR…
48513	organ development	0.0001087	41	1433E_DROME IMA_DROME DSH_DROME LAM0_DROME CBPD_DROME IMPE2_DROME BRAT_DROME ENA_DROME TBB3_DROME WDR1_DROME 2ABA_DROME DRK_DROME ANXB9_DROME SQD_DROME 41_DROME HDAC1_DROME FREQ_DROME RS21_DROME NDKA_DROME TERA_DROME ATX2_DROME IF4A_DROME IF5A_DROME HSP83_DROME CADF_DROME TBB1_DROME PNUT_DROME DCE_DROME SNAP_DROME PP2A_DROME NMT_DROME 1433Z_DROME SMD3_DROME HOW_DROME PPIA_DROME SQH_DROME GBLP_DRO…
50896	response to stimulus	0.00047742	40	DDX17_DROME SODM_DROME PSA3_DROME 1433E_DROME IMA_DROME DDB1_DROME PSA71_DROME LARK_DROME STAU_DROME FKB59_DROME GNAQ_DROME PRDX1_DROME OB99A_DROME DNAJ1_DROME HSP26_DROME TBB3_DROME PP12_DROME PSA6_DROME DRK_DROME PHM_DROME TPIS_DROME TRXR1_DROME GSH1_DROME VACHT_DROME HSP23_DROME IF4A_DROME HSP83_DROME PRS8_DROME GST1_DROME TBA1_DROME PUM_DROME TYDP1_DROME DCE_DROME PCNA_DROME PP2A_DROME 1433Z_…
7010	cytoskeleton organization	1.2348e-14	39	RL24_DROME 1433E_DROME RL14_DROME RSSA_DROME GBB1_DROME LARK_DROME RL9_DROME TBG1_DROME ENA_DROME GROU_DROME PP12_DROME 2AAA_DROME WDR1_DROME DRK_DROME SQD_DROME 41_DROME TERA_DROME RU2A_DROME IF4A_DROME HSP83_DROME RBP9X_DROME TBA1_DROME CADF_DROME U2AF1_DROME RAN_DROME RS15A_DROME HTS_DROME PNUT_DROME TCPA_DROME PCNA_DROME PP2A_DROME 1433Z_DROME SMD3_DROME DCTN2_DROME RL11_DROME RL31_DROME TCPG…
278	mitotic cell cycle	2.8458e-11	39	P08879 P55841 Q9VK69 P29310 O76932 Q9V597 Q9V436 P12613 Q9VXQ5 Q27268 P02828 A8DZ29 Q7K3J0 P48149 P25822 Q9VAJ2 Q9VBN5 Q9W392 P46222 Q7K2D2 P48605 Q7JRJ9 Q94535 P06603 P50882 P08928 P06604 Q9VJ19 P36179 O44437 Q9V4Q8 P12982 Q9VH81 Q7K148 P17917 Q9VJY6 Q02748 P23696 P23257
5829	cytosol	6.3105e-09	39	P55841 P52034 Q9VK69 Q9VN44 Q9GU68 Q9V597 Q9V3P0 P12613 Q9VXQ5 P56538 Q9VTE5 Q9VKX2 A8DZ29 Q9VQI7 Q7K3J0 Q9VYQ9 P48149 Q9VBN5 Q9W392 P25007 P46222 O18404 Q9VFT4 Q9VGP6 P48605 Q9VEP6 P50882 P31009 P49630 O97428 Q9VJ19 Q9VMH8 Q9VW56 Q9VCK0 Q9VK85 Q9VJY6 Q9VBU9 Q02748 Q7JVI3
279	M phase	1.997e-07	39	P08879 P55841 Q9VK69 O76932 Q9V597 Q9V436 P12613 Q9VXQ5 Q7KNM2 Q27268 A1Z8P9 P02828 A8DZ29 Q7K3J0 P48149 P25822 Q9VAJ2 Q9VBN5 Q9W392 P46222 Q7K2D2 P48605 Q7JRJ9 Q94535 P06603 P50882 P06604 Q9VJ19 P36179 O44437 Q9V4Q8 P12982 Q7K148 P17917 Q9VJY6 Q9VGW6 Q02748 P23696 P23257
22403	cell cycle phase	5.8723e-07	39	P08879 P55841 Q9VK69 O76932 Q9V597 Q9V436 P12613 Q9VXQ5 Q7KNM2 Q27268 A1Z8P9 P02828 A8DZ29 Q7K3J0 P48149 P25822 Q9VAJ2 Q9VBN5 Q9W392 P46222 Q7K2D2 P48605 Q7JRJ9 Q94535 P06603 P50882 P06604 Q9VJ19 P36179 O44437 Q9V4Q8 P12982 Q7K148 P17917 Q9VJY6 Q9VGW6 Q02748 P23696 P23257
30554	adenyl nucleotide binding	0.0027741	39	P08879 P48591 Q9VK69 Q7KN85 Q9V3V6 Q7KN62 P11147 P12613 Q9VXQ5 Q8T4C4 Q27268 Q9VIE7 Q9V9T5 Q9VUC1 Q9VSA3 P02828 Q7K3J0 Q9VNV3 Q9W392 Q9VHP0 P23128 P48604 P48605 P29843 P49735 Q7KUA4 Q9V461 P91929 P31409 O77277 Q9W414 Q9VQL1 Q9VU35 Q9VGW6 O18413 Q02748 Q9VHS8 Q8T0L3 Q9VBI2
1883	purine nucleoside binding	0.0029716	39	P08879 P48591 Q9VK69 Q7KN85 Q9V3V6 Q7KN62 P11147 P12613 Q9VXQ5 Q8T4C4 Q27268 Q9VIE7 Q9V9T5 Q9VUC1 Q9VSA3 P02828 Q7K3J0 Q9VNV3 Q9W392 Q9VHP0 P23128 P48604 P48605 P29843 P49735 Q7KUA4 Q9V461 P91929 P31409 O77277 Q9W414 Q9VQL1 Q9VU35 Q9VGW6 O18413 Q02748 Q9VHS8 Q8T0L3 Q9VBI2
1882	nucleoside binding	0.0034031	39	P08879 P48591 Q9VK69 Q7KN85 Q9V3V6 Q7KN62 P11147 P12613 Q9VXQ5 Q8T4C4 Q27268 Q9VIE7 Q9V9T5 Q9VUC1 Q9VSA3 P02828 Q7K3J0 Q9VNV3 Q9W392 Q9VHP0 P23128 P48604 P48605 P29843 P49735 Q7KUA4 Q9V461 P91929 P31409 O77277 Q9W414 Q9VQL1 Q9VU35 Q9VGW6 O18413 Q02748 Q9VHS8 Q8T0L3 Q9VBI2
226	microtubule cytoskeleton organization	4.3729e-12	38	P55841 Q9VK69 P29310 Q9V597 Q7KN62 Q9V436 P12613 Q9VXQ5 Q27268 A1Z8P9 P02828 A8DZ29 Q7K3J0 P48149 Q9VAJ2 Q9VBN5 Q9W392 P46222 Q7K2D2 P48605 Q7JRJ9 Q94535 P06603 P50882 P06604 Q9VJ19 P36179 O44437 O77430 Q9V4Q8 P12982 Q7K148 P92177 P17917 Q9VJY6 Q02748 P23696 P23257
9056	catabolic process	1.1146e-08	38	Q9XZ61 P52034 Q9V3V6 Q9V3P0 A0AQH0 Q9VSA3 Q7JR58 Q9VL70 Q9VKX2 P35122 Q7KSM5 Q9VQI7 P25822 P40304 Q01604 Q9VAN7 Q9VKZ8 Q9VJJ0 Q9XYZ5 Q7KUA4 Q95083 Q9VUJ1 Q9W414 P52029 O77430 P12881 Q9U616 Q9VWP1 P20228 Q9XZJ4 Q8T079 P22769 Q7K148 Q9XTL9 Q9V5C6 O18413 P07487 Q94522
51641	cellular localization	2.4071e-05	37	Q9VN44 Q9V455 Q9V895 Q7KN62 P52295 P11147 Q9VZ23 Q9VQE0 Q7KNM2 Q27268 Q9VQQ6 Q24253 P37236 A1Z8P9 Q9V8R9 P13395 P02828 O97182 Q9W1I8 P48809 Q7K2D2 Q9W1X4 P48604 P40423 Q7JRJ9 Q9VRV8 Q9VGH5 P08928 Q9VNH6 Q0KIE7 P12982 Q23983 Q9U6R9 Q9VLB7 Q94901 P40797 Q9Y0Y5
5524	ATP binding	0.0020483	37	P08879 P48591 Q9VK69 Q7KN85 Q9V3V6 Q7KN62 P11147 P12613 Q9VXQ5 Q8T4C4 Q27268 Q9VIE7 Q9V9T5 Q9VUC1 P02828 Q7K3J0 Q9VNV3 Q9W392 Q9VHP0 P23128 P48605 P29843 P49735 Q7KUA4 Q9V461 P91929 P31409 O77277 Q9W414 Q9VQL1 Q9VU35 Q9VGW6 O18413 Q02748 Q9VHS8 Q8T0L3 Q9VBI2
32559	adenyl ribonucleotide binding	0.0020997	37	P08879 P48591 Q9VK69 Q7KN85 Q9V3V6 Q7KN62 P11147 P12613 Q9VXQ5 Q8T4C4 Q27268 Q9VIE7 Q9V9T5 Q9VUC1 P02828 Q7K3J0 Q9VNV3 Q9W392 Q9VHP0 P23128 P48605 P29843 P49735 Q7KUA4 Q9V461 P91929 P31409 O77277 Q9W414 Q9VQL1 Q9VU35 Q9VGW6 O18413 Q02748 Q9VHS8 Q8T0L3 Q9VBI2
48468	cell development	9.2441e-06	36	DDX3_DROME 1433E_DROME IMA_DROME DSH_DROME DYLT_DROME STAU_DROME BRAT_DROME GNAQ_DROME ENA_DROME GROU_DROME TBB3_DROME PP12_DROME SQD_DROME 41_DROME HDAC1_DROME FREQ_DROME TMEDA_DROME TERA_DROME IF4A_DROME HSP83_DROME HSP7D_DROME RBP9X_DROME CADF_DROME PUM_DROME RB97D_DROME HTS_DROME PNUT_DROME DCE_DROME PCNA_DROME ARMET_DROME 1433Z_DROME HOW_DROME SQH_DROME MCM6_DROME RB27C_DROME SPTCA_DROME
7017	microtubule-based process	1.6393e-13	35	RL24_DROME 1433E_DROME RL14_DROME RSSA_DROME DYLT_DROME AN32A_DROME STAU_DROME RL9_DROME TBG1_DROME TBB3_DROME PP12_DROME 2AAA_DROME SQD_DROME NDKA_DROME TERA_DROME RU2A_DROME IF4A_DROME HSP83_DROME TBA1_DROME U2AF1_DROME RS15A_DROME HTS_DROME TBB1_DROME TCPA_DROME PCNA_DROME PP2A_DROME 1433Z_DROME SMD3_DROME DCTN2_DROME RL11_DROME RL31_DROME TCPG_DROME TBA2_DROME TBB2_DROME PP4C_DROME
16070	RNA metabolic process	0.00051369	35	Q9VM49 Q9VLK1 Q9VCE3 P11147 Q9VQK7 Q9V3P3 Q27268 Q9VVU6 A8DZ29 Q9VE52 Q9VYQ9 P48809 P25822 Q9VNV3 P20232 Q9W1V3 Q9VFT4 Q94535 Q9U3Z7 Q95RE4 Q7K4B3 Q9VW53 Q9V3W7 Q7JZF5 Q9W255 O18640 Q8MQJ9 Q9VQL1 O44437 Q9V4Q8 Q9VWP1 Q7KMJ6 Q9VND7 Q94901 Q9VHS8
7051	spindle organization	1.4844e-13	34	P55841 Q9VK69 Q9V597 Q9V436 P12613 Q9VXQ5 Q27268 A1Z8P9 P02828 A8DZ29 Q7K3J0 P48149 Q9VAJ2 Q9VBN5 Q9W392 P46222 Q7K2D2 P48605 Q7JRJ9 Q94535 P06603 P50882 P06604 Q9VJ19 P36179 O44437 Q9V4Q8 P12982 Q7K148 P17917 Q9VJY6 Q02748 P23696 P23257
44085	cellular component biogenesis	1.0564e-08	34	IMA_DROME DSH_DROME NU214_DROME MCM2_DROME STAU_DROME ELP2_DROME DDX6_DROME TBG1_DROME TBB3_DROME PP12_DROME 2AAA_DROME MSL1_DROME SQD_DROME 41_DROME DDX1_DROME TERA_DROME HSP83_DROME RBP9X_DROME TBA1_DROME CADF_DROME FBRL_DROME ADRM1_DROME NH2L1_DROME TBB1_DROME PNUT_DROME DCE_DROME SNAP_DROME PCNA_DROME PP2A_DROME IF6_DROME MCM6_DROME RB27C_DROME TBA2_DROME TBB2_DROME
3	reproduction	7.8616e-05	34	DDX3_DROME 1433E_DROME IMA_DROME DSH_DROME DYLT_DROME LAM0_DROME BAF_DROME LARK_DROME STAU_DROME PFD2_DROME BRAT_DROME ENA_DROME GROU_DROME PP12_DROME SQD_DROME HDAC1_DROME TMEDA_DROME TERA_DROME ATX2_DROME IF4A_DROME HSP83_DROME RBP9X_DROME CADF_DROME PUM_DROME RB97D_DROME HTS_DROME PCNA_DROME PP2A_DROME 1433Z_DROME SQH_DROME MCM6_DROME GBLP_DROME RB27C_DROME SPTCA_DROME
22414	reproductive process	7.8616e-05	34	DDX3_DROME 1433E_DROME IMA_DROME DSH_DROME DYLT_DROME LAM0_DROME BAF_DROME LARK_DROME STAU_DROME PFD2_DROME BRAT_DROME ENA_DROME GROU_DROME PP12_DROME SQD_DROME HDAC1_DROME TMEDA_DROME TERA_DROME ATX2_DROME IF4A_DROME HSP83_DROME RBP9X_DROME CADF_DROME PUM_DROME RB97D_DROME HTS_DROME PCNA_DROME PP2A_DROME 1433Z_DROME SQH_DROME MCM6_DROME GBLP_DROME RB27C_DROME SPTCA_DROME
7399	nervous system development	5.1531e-06	33	DSH_DROME LAM0_DROME GBB1_DROME STAU_DROME BRAT_DROME FKB59_DROME GNAQ_DROME ENA_DROME GROU_DROME TBB3_DROME PP12_DROME 2ABA_DROME DRK_DROME ELAV_DROME 41_DROME HDAC1_DROME TERA_DROME HSP83_DROME HSP7D_DROME CADF_DROME PUM_DROME NH2L1_DROME TYDP1_DROME PNUT_DROME DCE_DROME PP2A_DROME ARMET_DROME 1433Z_DROME SMD3_DROME HOW_DROME RB27C_DROME CSN4_DROME SPTCA_DROME
5739	mitochondrion	0.0013391	33	Q7JXC4 P11147 P12613 Q8T4C4 Q9VMI3 Q9VW68 Q9V9T5 Q9VSA3 Q7JR58 Q9VL70 Q9VJZ4 Q9VNX4 O18404 Q00637 P48604 P20477 P29843 Q9VV75 Q9VGP7 Q9W2X6 P91929 Q9VU35 Q9U616 Q9VMB9 B7Z0X1 Q9VHW4 Q24439 Q0KHZ6 Q9V9E3 A1Z9E3 Q9W086 Q94522 Q9VF27
16491	oxidoreductase activity	0.0031704	33	Q9VSU6 P48591 Q9W4U2 Q9V3P0 Q9VKI8 Q9VMI3 Q6AWN0 Q7KRU8 Q9VSA3 Q9VKX2 Q9V3F8 Q9VQI7 Q9VJZ4 Q9VH72 Q9VNX4 O18404 Q00637 Q9VJZ6 B7Z001 P20477 O01404 Q9VV75 P91929 Q9VRJ4 P52029 Q9VVJ7 Q8T079 Q9VMB9 Q9VXJ0 P41043 Q8SX57 P07487 Q9VF27
7052	mitotic spindle organization	4.8003e-14	32	P55841 Q9VK69 Q9V597 Q9V436 P12613 Q9VXQ5 Q27268 P02828 A8DZ29 Q7K3J0 P48149 Q9VAJ2 Q9VBN5 Q9W392 P46222 Q7K2D2 P48605 Q7JRJ9 Q94535 P06603 P50882 P06604 Q9VJ19 P36179 O44437 Q9V4Q8 P12982 Q7K148 P17917 Q9VJY6 Q02748 P23257
22607	cellular component assembly	1.3946e-08	32	IMA_DROME DSH_DROME NU214_DROME MCM2_DROME STAU_DROME ELP2_DROME DDX6_DROME TBG1_DROME TBB3_DROME PP12_DROME 2AAA_DROME MSL1_DROME SQD_DROME 41_DROME DDX1_DROME TERA_DROME HSP83_DROME RBP9X_DROME TBA1_DROME CADF_DROME ADRM1_DROME TBB1_DROME PNUT_DROME DCE_DROME SNAP_DROME PCNA_DROME PP2A_DROME IF6_DROME MCM6_DROME RB27C_DROME TBA2_DROME TBB2_DROME
7276	gamete generation	1.2693e-05	32	DDX3_DROME 1433E_DROME IMA_DROME DSH_DROME DYLT_DROME BAF_DROME LARK_DROME STAU_DROME PFD2_DROME BRAT_DROME ENA_DROME PP12_DROME SQD_DROME HDAC1_DROME TMEDA_DROME TERA_DROME ATX2_DROME IF4A_DROME HSP83_DROME RBP9X_DROME CADF_DROME PUM_DROME RB97D_DROME HTS_DROME PCNA_DROME PP2A_DROME 1433Z_DROME SQH_DROME MCM6_DROME GBLP_DROME RB27C_DROME SPTCA_DROME
19953	sexual reproduction	2.3669e-05	32	DDX3_DROME 1433E_DROME IMA_DROME DSH_DROME DYLT_DROME BAF_DROME LARK_DROME STAU_DROME PFD2_DROME BRAT_DROME ENA_DROME PP12_DROME SQD_DROME HDAC1_DROME TMEDA_DROME TERA_DROME ATX2_DROME IF4A_DROME HSP83_DROME RBP9X_DROME CADF_DROME PUM_DROME RB97D_DROME HTS_DROME PCNA_DROME PP2A_DROME 1433Z_DROME SQH_DROME MCM6_DROME GBLP_DROME RB27C_DROME SPTCA_DROME
48609	reproductive process in a multicellular organism	8.6443e-05	32	DDX3_DROME 1433E_DROME IMA_DROME DSH_DROME DYLT_DROME BAF_DROME LARK_DROME STAU_DROME PFD2_DROME BRAT_DROME ENA_DROME PP12_DROME SQD_DROME HDAC1_DROME TMEDA_DROME TERA_DROME ATX2_DROME IF4A_DROME HSP83_DROME RBP9X_DROME CADF_DROME PUM_DROME RB97D_DROME HTS_DROME PCNA_DROME PP2A_DROME 1433Z_DROME SQH_DROME MCM6_DROME GBLP_DROME RB27C_DROME SPTCA_DROME
32504	multicellular organism reproduction	8.6443e-05	32	DDX3_DROME 1433E_DROME IMA_DROME DSH_DROME DYLT_DROME BAF_DROME LARK_DROME STAU_DROME PFD2_DROME BRAT_DROME ENA_DROME PP12_DROME SQD_DROME HDAC1_DROME TMEDA_DROME TERA_DROME ATX2_DROME IF4A_DROME HSP83_DROME RBP9X_DROME CADF_DROME PUM_DROME RB97D_DROME HTS_DROME PCNA_DROME PP2A_DROME 1433Z_DROME SQH_DROME MCM6_DROME GBLP_DROME RB27C_DROME SPTCA_DROME
43233	organelle lumen	0.0013172	32	P54399 O44226 Q8MT06 Q7JXC4 Q9VW68 Q9V9T5 Q9VSA3 Q7JR58 Q9VE52 P48809 Q9VNX4 Q9VAJ2 P25007 Q00637 Q9W1V3 Q94517 P48604 P49735 Q9V461 Q9VGP7 P08928 Q86NP2 P91929 Q7JZF5 O77277 Q9VU35 Q0KHZ6 P48810 Q9V9E3 Q9W086 Q9VGW6 Q94522
70013	intracellular organelle lumen	0.0013172	32	P54399 O44226 Q8MT06 Q7JXC4 Q9VW68 Q9V9T5 Q9VSA3 Q7JR58 Q9VE52 P48809 Q9VNX4 Q9VAJ2 P25007 Q00637 Q9W1V3 Q94517 P48604 P49735 Q9V461 Q9VGP7 P08928 Q86NP2 P91929 Q7JZF5 O77277 Q9VU35 Q0KHZ6 P48810 Q9V9E3 Q9W086 Q9VGW6 Q94522
31974	membrane-enclosed lumen	0.0019182	32	P54399 O44226 Q8MT06 Q7JXC4 Q9VW68 Q9V9T5 Q9VSA3 Q7JR58 Q9VE52 P48809 Q9VNX4 Q9VAJ2 P25007 Q00637 Q9W1V3 Q94517 P48604 P49735 Q9V461 Q9VGP7 P08928 Q86NP2 P91929 Q7JZF5 O77277 Q9VU35 Q0KHZ6 P48810 Q9V9E3 Q9W086 Q9VGW6 Q94522
17111	nucleoside-triphosphatase activity	9.3039e-09	31	VATD1_DROME DDX3_DROME DDX17_DROME DYLT_DROME GBB1_DROME MLC2_DROME ATPO_DROME VATE_DROME GNAQ_DROME DDX6_DROME TBG1_DROME TBB3_DROME SEPT2_DROME DDX1_DROME TERA_DROME IF4A_DROME HSP83_DROME PRS8_DROME HSP7D_DROME TBA1_DROME RAN_DROME TBB1_DROME TCPA_DROME VATG_DROME HSP7A_DROME SQH_DROME VATB_DROME TCPG_DROME TBA2_DROME TBB2_DROME SEPT1_DROME
16462	pyrophosphatase activity	1.3596e-08	31	VATD1_DROME DDX3_DROME DDX17_DROME DYLT_DROME GBB1_DROME MLC2_DROME ATPO_DROME VATE_DROME GNAQ_DROME DDX6_DROME TBG1_DROME TBB3_DROME SEPT2_DROME DDX1_DROME TERA_DROME IF4A_DROME HSP83_DROME PRS8_DROME HSP7D_DROME TBA1_DROME RAN_DROME TBB1_DROME TCPA_DROME VATG_DROME HSP7A_DROME SQH_DROME VATB_DROME TCPG_DROME TBA2_DROME TBB2_DROME SEPT1_DROME
48477	oogenesis	1.7614e-07	30	DDX3_DROME 1433E_DROME IMA_DROME DSH_DROME BAF_DROME LARK_DROME STAU_DROME PFD2_DROME BRAT_DROME ENA_DROME PP12_DROME SQD_DROME HDAC1_DROME TMEDA_DROME TERA_DROME ATX2_DROME IF4A_DROME HSP83_DROME RBP9X_DROME CADF_DROME PUM_DROME HTS_DROME PCNA_DROME PP2A_DROME 1433Z_DROME SQH_DROME MCM6_DROME GBLP_DROME RB27C_DROME SPTCA_DROME
7292	female gamete generation	2.2407e-07	30	DDX3_DROME 1433E_DROME IMA_DROME DSH_DROME BAF_DROME LARK_DROME STAU_DROME PFD2_DROME BRAT_DROME ENA_DROME PP12_DROME SQD_DROME HDAC1_DROME TMEDA_DROME TERA_DROME ATX2_DROME IF4A_DROME HSP83_DROME RBP9X_DROME CADF_DROME PUM_DROME HTS_DROME PCNA_DROME PP2A_DROME 1433Z_DROME SQH_DROME MCM6_DROME GBLP_DROME RB27C_DROME SPTCA_DROME
51649	establishment of localization in cell	0.00019642	30	Q9VN44 Q9V455 Q9V895 P52295 P11147 Q9VZ23 Q7KNM2 Q27268 Q9VQQ6 Q24253 P37236 A1Z8P9 Q9V8R9 P13395 O97182 Q9W1I8 Q9W1X4 P48604 P40423 Q7JRJ9 Q9VRV8 P08928 Q9VNH6 P12982 Q23983 Q9U6R9 Q9VLB7 Q94901 P40797 Q9Y0Y5
16887	ATPase activity	2.3446e-06	29	P54611 P54357 Q9VK69 Q9V3V6 Q7KN62 P11147 Q7KMS3 P12613 Q9VXQ5 Q8T4C4 Q27268 P02828 Q9V7D2 Q7K3J0 Q9VNV3 Q9VHP0 P23128 P48605 P40423 P29843 Q9W2X6 P31409 Q9W414 Q24439 O18413 Q02748 Q9VHS8 Q9XZH6 Q94524
5198	structural molecule activity	0.00027218	29	P55841 Q9V597 Q7K2X8 Q9V8R9 O97062 P48149 Q9VBN5 P46222 P08841 Q7JXF5 Q9VR79 P06603 P50882 P31009 Q9VGP7 P49630 P08928 P06604 Q9VJ19 Q24560 Q0KIE7 Q9VJY6 Q9W086 Q9VBU9 Q9VZF9 P61857 Q8MST5 P23257 Q9Y0Y5
33036	macromolecule localization	0.0011497	29	Q9VN44 P51140 Q9V455 Q7KN62 P52295 Q9VZ23 Q7KNM2 Q27268 Q9VQQ6 Q24253 A1Z8P9 Q8T0Q4 Q9V8R9 P02828 P48809 Q9W1X4 Q9VVA7 P48604 Q7JRJ9 Q9VRV8 Q9VGH5 Q9VNH6 Q0KIE7 Q23983 Q9U6R9 Q9VLB7 Q94901 P26308 Q8T0L3
34621	cellular macromolecular complex subunit organization	3.0606e-12	28	P52295 P50535 B7YZQ7 Q9VU68 P56538 O97182 Q9W1G7 Q9VNV3 Q9W1X4 P23128 P08841 Q7JRJ9 P49735 P06603 Q9V461 Q7K4B3 P06604 Q9V3W7 P45594 Q24560 Q23983 Q9U6R9 Q7K2G1 Q9VK85 Q9VGW6 P61857 Q8MST5 P23257
43933	macromolecular complex subunit organization	2.5079e-08	28	P52295 P50535 B7YZQ7 Q9VU68 P56538 O97182 Q9W1G7 Q9VNV3 Q9W1X4 P23128 P08841 Q7JRJ9 P49735 P06603 Q9V461 Q7K4B3 P06604 Q9V3W7 P45594 Q24560 Q23983 Q9U6R9 Q7K2G1 Q9VK85 Q9VGW6 P61857 Q8MST5 P23257
44283	small molecule biosynthetic process	4.5853e-08	28	P54611 P08879 Q9VTW1 Q9VMW9 P29310 Q9VKI8 Q9VHA2 Q9W3K5 Q8T4C4 Q9W3U9 Q6AWN0 Q9VIE7 Q9V7D2 Q9V3F8 Q9VNX4 Q9VN95 P20477 Q9VEP6 Q9VC18 Q9VT32 Q9W2X6 P31409 P52029 P20228 B7Z0X1 Q24439 Q9Y0Y2 Q9VRD9
44248	cellular catabolic process	4.1029e-07	28	Q9XZ61 Q9V3P0 A0AQH0 Q9VSA3 Q7JR58 Q9VL70 P35122 Q7KSM5 Q9VQI7 P25822 P40304 Q9VKZ8 Q9VJJ0 Q9XYZ5 Q7KUA4 Q95083 Q9VUJ1 O77430 P12881 Q9U616 Q9VWP1 P20228 Q9XZJ4 P22769 Q7K148 Q9V5C6 O18413 Q94522
6396	RNA processing	5.3131e-05	28	Q9VM49 Q9VLK1 Q9VCE3 P11147 Q9VQK7 Q9V3P3 Q27268 Q9VVU6 Q9VE52 Q9VYQ9 P48809 Q9VNV3 Q9W1V3 Q9VFT4 Q94535 Q9U3Z7 Q95RE4 Q9VW53 Q9V3W7 Q9W255 O18640 O44437 Q9V4Q8 Q9VWP1 Q7KMJ6 Q9VND7 Q94901 Q9VHS8
6457	protein folding	5.2455e-16	27	Q9VGK3 P54399 Q9VK69 P29310 Q9VPQ2 P11147 P12613 Q9VXQ5 Q24133 Q9VUC1 Q9VTE5 P02828 Q7K3J0 Q9W392 P25007 Q9VL78 P48604 Q9VGP6 P48605 P29843 Q3YMU0 Q9VMH8 O77277 Q9VU35 Q9TVP3 Q9VW56 P02518
22008	neurogenesis	7.4182e-06	27	DSH_DROME GBB1_DROME STAU_DROME BRAT_DROME GNAQ_DROME ENA_DROME GROU_DROME TBB3_DROME PP12_DROME 2ABA_DROME DRK_DROME 41_DROME HDAC1_DROME TERA_DROME HSP83_DROME HSP7D_DROME CADF_DROME PUM_DROME PNUT_DROME PP2A_DROME ARMET_DROME 1433Z_DROME SMD3_DROME HOW_DROME RB27C_DROME CSN4_DROME SPTCA_DROME
44428	nuclear part	0.0053116	27	DDX17_DROME IMA_DROME ROA1_DROME NU214_DROME LAM0_DROME MCM2_DROME LARK_DROME ELAV_DROME MSL1_DROME GNL3_DROME SQD_DROME HDAC1_DROME NELFA_DROME RU2A_DROME HSP7D_DROME FBRL_DROME U2AF1_DROME HCF_DROME RAN_DROME NH2L1_DROME RB87F_DROME SMD3_DROME PPIA_DROME MCM6_DROME GBLP_DROME RB27C_DROME CSN4_DROME
16071	mRNA metabolic process	7.6514e-06	26	Q9VM49 Q9VCE3 P11147 Q9VQK7 Q9V3P3 Q27268 Q9VVU6 Q9VE52 Q9VYQ9 P48809 P25822 Q9VNV3 Q9VFT4 Q94535 Q9U3Z7 Q95RE4 Q9V3W7 Q9W255 O18640 O44437 Q9V4Q8 Q9VWP1 Q7KMJ6 Q9VND7 Q94901 Q9VHS8
3006	reproductive developmental process	1.4667e-05	26	DDX3_DROME 1433E_DROME IMA_DROME DSH_DROME DYLT_DROME LAM0_DROME STAU_DROME ENA_DROME GROU_DROME SQD_DROME TMEDA_DROME TERA_DROME ATX2_DROME IF4A_DROME HSP83_DROME RBP9X_DROME CADF_DROME PUM_DROME RB97D_DROME HTS_DROME PCNA_DROME 1433Z_DROME SQH_DROME MCM6_DROME RB27C_DROME SPTCA_DROME
48519	negative regulation of biological process	0.00030302	26	DDX3_DROME DDX17_DROME RL14_DROME DSH_DROME ROA1_DROME LAM0_DROME LARK_DROME BRAT_DROME GNAQ_DROME GROU_DROME 2ABA_DROME ELAV_DROME SQD_DROME HDAC1_DROME NELFA_DROME IF4A_DROME HSP7D_DROME TBA1_DROME PUM_DROME PP2A_DROME CTBP_DROME RB27C_DROME CSN4_DROME TBA2_DROME API5_DROME SPTCA_DROME
65008	regulation of biological quality	0.00030302	26	DSH_DROME PRDX1_DROME ENA_DROME EXOC4_DROME DRK_DROME 41_DROME FREQ_DROME HCD2_DROME TRXR1_DROME ATX2_DROME HSP83_DROME ANX11_DROME HSP7D_DROME RBP9X_DROME CAB32_DROME PUM_DROME RAN_DROME DCE_DROME SNAP_DROME PP2A_DROME ARMET_DROME 1433Z_DROME HOW_DROME PDI_DROME CSN4_DROME SPTCA_DROME
34622	cellular macromolecular complex assembly	1.4188e-11	25	P52295 P50535 P56538 O97182 Q9W1G7 Q9VNV3 Q9W1X4 P23128 P08841 Q7JRJ9 P49735 P06603 Q9V461 Q7K4B3 P06604 Q9V3W7 P45594 Q24560 Q23983 Q9U6R9 Q7K2G1 Q9VGW6 P61857 Q8MST5 P23257
65003	macromolecular complex assembly	1.5383e-07	25	P52295 P50535 P56538 O97182 Q9W1G7 Q9VNV3 Q9W1X4 P23128 P08841 Q7JRJ9 P49735 P06603 Q9V461 Q7K4B3 P06604 Q9V3W7 P45594 Q24560 Q23983 Q9U6R9 Q7K2G1 Q9VGW6 P61857 Q8MST5 P23257
6397	mRNA processing	6.6297e-06	25	Q9VM49 Q9VCE3 P11147 Q9VQK7 Q9V3P3 Q27268 Q9VVU6 Q9VE52 Q9VYQ9 P48809 Q9VNV3 Q9VFT4 Q94535 Q9U3Z7 Q95RE4 Q9V3W7 Q9W255 O18640 O44437 Q9V4Q8 Q9VWP1 Q7KMJ6 Q9VND7 Q94901 Q9VHS8
48699	generation of neurons	2.8725e-05	25	DSH_DROME GBB1_DROME STAU_DROME BRAT_DROME GNAQ_DROME ENA_DROME GROU_DROME TBB3_DROME PP12_DROME 2ABA_DROME DRK_DROME HDAC1_DROME TERA_DROME HSP83_DROME HSP7D_DROME CADF_DROME PUM_DROME PNUT_DROME PP2A_DROME ARMET_DROME 1433Z_DROME SMD3_DROME RB27C_DROME CSN4_DROME SPTCA_DROME
48610	reproductive cellular process	3.5848e-05	25	DDX3_DROME 1433E_DROME IMA_DROME DSH_DROME DYLT_DROME BAF_DROME STAU_DROME ENA_DROME SQD_DROME TMEDA_DROME TERA_DROME ATX2_DROME IF4A_DROME HSP83_DROME RBP9X_DROME CADF_DROME PUM_DROME RB97D_DROME HTS_DROME PCNA_DROME 1433Z_DROME SQH_DROME MCM6_DROME RB27C_DROME SPTCA_DROME
44429	mitochondrial part	0.0021543	25	Q7JXC4 P12613 Q8T4C4 Q9VMI3 Q9VW68 Q9V9T5 Q9VSA3 Q7JR58 Q9VJZ4 Q9VNX4 Q00637 P48604 Q9VV75 Q9VGP7 Q9W2X6 P91929 Q9VU35 Q9VMB9 Q9VHW4 Q24439 Q0KHZ6 Q9V9E3 Q9W086 Q94522 Q9VF27
44271	cellular nitrogen compound biosynthetic process	7.4876e-07	24	P54611 P08879 Q9VT32 Q9VTW1 P29310 Q9W2X6 P31409 Q9VKI8 Q9VHA2 Q8T4C4 Q9W3U9 Q6AWN0 Q9VIE7 Q9V7D2 B7Z0X1 Q9V3F8 Q24439 Q9VNX4 Q9VN95 P20477 Q9Y0Y2 Q9VRD9 Q9VEP6 Q9VC18
43436	oxoacid metabolic process	5.9614e-06	24	Q7KN85 P29310 Q9VKI8 Q9V3S9 Q9VQL1 P52029 Q6AWN0 Q9U616 Q9VIE7 Q7JXZ2 Q9VW68 Q9V9T5 P20228 Q9VSA3 Q7JR58 Q9VL70 Q9VKX2 B7Z0X1 Q9V3F8 Q9VNX4 Q9VN95 O18404 P20477 Q9VRD9
19752	carboxylic acid metabolic process	5.9614e-06	24	Q7KN85 P29310 Q9VKI8 Q9V3S9 Q9VQL1 P52029 Q6AWN0 Q9U616 Q9VIE7 Q7JXZ2 Q9VW68 Q9V9T5 P20228 Q9VSA3 Q7JR58 Q9VL70 Q9VKX2 B7Z0X1 Q9V3F8 Q9VNX4 Q9VN95 O18404 P20477 Q9VRD9
6082	organic acid metabolic process	5.9614e-06	24	Q7KN85 P29310 Q9VKI8 Q9V3S9 Q9VQL1 P52029 Q6AWN0 Q9U616 Q9VIE7 Q7JXZ2 Q9VW68 Q9V9T5 P20228 Q9VSA3 Q7JR58 Q9VL70 Q9VKX2 B7Z0X1 Q9V3F8 Q9VNX4 Q9VN95 O18404 P20477 Q9VRD9
42180	cellular ketone metabolic process	2.0182e-05	24	Q7KN85 P29310 Q9VKI8 Q9V3S9 Q9VQL1 P52029 Q6AWN0 Q9U616 Q9VIE7 Q7JXZ2 Q9VW68 Q9V9T5 P20228 Q9VSA3 Q7JR58 Q9VL70 Q9VKX2 B7Z0X1 Q9V3F8 Q9VNX4 Q9VN95 O18404 P20477 Q9VRD9
8104	protein localization	0.00057395	24	Q9VRV8 Q9VN44 P51140 Q9V455 Q7KN62 P52295 Q9VZ23 Q9VNH6 Q7KNM2 Q9VQQ6 Q24253 Q0KIE7 A1Z8P9 Q8T0Q4 Q9V8R9 Q23983 Q9U6R9 Q9VLB7 Q94901 Q9W1X4 P26308 Q9VVA7 P48604 Q7JRJ9
9057	macromolecule catabolic process	2.8289e-07	23	Q9XZ61 Q9VJJ0 Q9XYZ5 Q7KUA4 Q9V3V6 A0AQH0 Q95083 Q9VUJ1 Q9W414 O77430 P12881 Q9VWP1 Q9XZJ4 P22769 Q7K148 P35122 Q7KSM5 Q9XTL9 P25822 Q9V5C6 O18413 P40304 Q9VKZ8
377	RNA splicing, via transesterification reactions with bulged adenosine as nucleophile	1.5556e-06	23	Q9VM49 Q9U3Z7 Q9VCE3 Q95RE4 Q9V3W7 Q9W255 O18640 P11147 Q9VQK7 Q9V3P3 Q27268 O44437 Q9VVU6 Q9V4Q8 Q9VWP1 Q7KMJ6 Q9VND7 Q9VYQ9 Q9VNV3 Q94901 Q9VFT4 Q9VHS8 Q94535
398	nuclear mRNA splicing, via spliceosome	1.5556e-06	23	Q9VM49 Q9U3Z7 Q9VCE3 Q95RE4 Q9V3W7 Q9W255 O18640 P11147 Q9VQK7 Q9V3P3 Q27268 O44437 Q9VVU6 Q9V4Q8 Q9VWP1 Q7KMJ6 Q9VND7 Q9VYQ9 Q9VNV3 Q94901 Q9VFT4 Q9VHS8 Q94535
375	RNA splicing, via transesterification reactions	1.9701e-06	23	Q9VM49 Q9U3Z7 Q9VCE3 Q95RE4 Q9V3W7 Q9W255 O18640 P11147 Q9VQK7 Q9V3P3 Q27268 O44437 Q9VVU6 Q9V4Q8 Q9VWP1 Q7KMJ6 Q9VND7 Q9VYQ9 Q9VNV3 Q94901 Q9VFT4 Q9VHS8 Q94535
8380	RNA splicing	3.3578e-06	23	Q9VM49 Q9U3Z7 Q9VCE3 Q95RE4 Q9V3W7 Q9W255 O18640 P11147 Q9VQK7 Q9V3P3 Q27268 O44437 Q9VVU6 Q9V4Q8 Q9VWP1 Q7KMJ6 Q9VND7 Q9VYQ9 Q9VNV3 Q94901 Q9VFT4 Q9VHS8 Q94535
44445	cytosolic part	2.5678e-10	22	P55841 P50882 P52034 P31009 Q9VK69 P49630 Q9V597 Q9VJ19 P12613 Q9VXQ5 Q9VMH8 Q9VW56 Q9VTE5 Q7K3J0 P48149 Q9VBN5 Q9W392 P46222 Q9VJY6 Q9VBU9 Q9VGP6 P48605
6091	generation of precursor metabolites and energy	1.0194e-06	22	P54611 Q9VV75 P52034 Q9W2X6 P91929 P31409 Q8T4C4 P52029 Q9VMI3 Q9VMB9 Q9VKX2 Q9V7D2 Q9XTL9 Q9VJZ4 Q24439 Q9VLS1 Q0KHZ6 Q01604 P07487 Q94522 Q9VF27 Q9VAN7
30182	neuron differentiation	6.4309e-05	22	HSP7D_DROME DSH_DROME CADF_DROME PUM_DROME PNUT_DROME BRAT_DROME PP2A_DROME ARMET_DROME GNAQ_DROME 1433Z_DROME SMD3_DROME ENA_DROME GROU_DROME TBB3_DROME PP12_DROME DRK_DROME HDAC1_DROME RB27C_DROME CSN4_DROME TERA_DROME SPTCA_DROME HSP83_DROME
31967	organelle envelope	0.00065569	22	Q7JXF5 Q9VRV8 Q9VV75 P54399 Q9VN44 Q9W2X6 P08928 Q9V455 P91929 P52295 P12613 Q8T4C4 Q9VMI3 Q7K2X8 A1Z8P9 Q9VMB9 Q9VHW4 Q9VJZ4 Q24439 Q8SX89 Q9W1X4 Q9VF27
31975	envelope	0.00098637	22	Q7JXF5 Q9VRV8 Q9VV75 P54399 Q9VN44 Q9W2X6 P08928 Q9V455 P91929 P52295 P12613 Q8T4C4 Q9VMI3 Q7K2X8 A1Z8P9 Q9VMB9 Q9VHW4 Q9VJZ4 Q24439 Q8SX89 Q9W1X4 Q9VF27
48523	negative regulation of cellular process	0.002053	22	RL14_DROME DSH_DROME TBA1_DROME ROA1_DROME PUM_DROME LAM0_DROME BRAT_DROME PP2A_DROME GNAQ_DROME GROU_DROME 2ABA_DROME ELAV_DROME CTBP_DROME SQD_DROME HDAC1_DROME RB27C_DROME NELFA_DROME CSN4_DROME TBA2_DROME API5_DROME SPTCA_DROME IF4A_DROME
9790	embryonic development	0.0020978	22	HSP7D_DROME DSH_DROME MO25_DROME PUM_DROME LARK_DROME STAU_DROME NMT_DROME 1433Z_DROME ENA_DROME HOW_DROME VATG_DROME 2ABA_DROME SQH_DROME DRK_DROME CTBP_DROME SQD_DROME 41_DROME HDAC1_DROME RB27C_DROME DDX1_DROME TERA_DROME HSP83_DROME
30163	protein catabolic process	2.9061e-09	21	Q9XZ61 Q9VJJ0 Q9XYZ5 Q7KUA4 Q9V3V6 A0AQH0 Q95083 Q9VUJ1 Q9W414 O77430 P12881 Q9VWP1 Q9XZJ4 P22769 Q7K148 P35122 Q7KSM5 Q9V5C6 O18413 P40304 Q9VKZ8
51128	regulation of cellular component organization	2.3123e-07	21	ANX11_DROME 1433E_DROME DSH_DROME TBA1_DROME CADF_DROME PUM_DROME HCF_DROME RAN_DROME STAU_DROME PP2A_DROME ENA_DROME 2ABA_DROME SQH_DROME DRK_DROME RB27C_DROME TBA2_DROME TERA_DROME SPTCA_DROME ATX2_DROME IF5A_DROME HSP83_DROME
5681	spliceosomal complex	6.8614e-07	21	Q9VM49 Q9U3Z7 Q95RE4 Q9V3W7 Q9W255 O18640 P11147 Q9VQK7 Q9V3P3 Q27268 O44437 Q9VVU6 Q9V4Q8 Q9VWP1 Q7KMJ6 Q9VND7 Q9VYQ9 Q94901 Q9VFT4 Q9VHS8 Q94535
6519	cellular amino acid and derivative metabolic process	2.1412e-06	21	O01404 Q9VTW1 P29310 Q9GU68 Q9VKI8 Q9VHA2 Q9W3K5 Q9VQL1 Q6AWN0 Q9U616 Q9VIE7 Q7JXZ2 Q9VW68 Q9V9T5 P20228 B7Z0X1 Q9V3F8 Q9VNX4 Q9VN95 P20477 Q9VRD9
3723	RNA binding	0.0012123	21	DDX17_DROME ROA1_DROME FBRL_DROME PUM_DROME U2AF1_DROME RB97D_DROME NH2L1_DROME LARK_DROME STAU_DROME RS2_DROME RB87F_DROME RL9_DROME DDX6_DROME HOW_DROME ELAV_DROME SQD_DROME RB27C_DROME NELFA_DROME RU2A_DROME IF4A_DROME IF5A_DROME
502	proteasome complex	4.9158e-15	20	Q9XZ61 Q9VJJ0 Q7K4B3 Q9V3V6 Q7KN62 Q7KLV9 A0AQH0 Q95083 Q9V436 Q9VUJ1 Q9V3P3 Q9W414 P12881 Q9XZJ4 P22769 Q7K148 Q7K2G1 Q9V5C6 O18413 P40304
71011	precatalytic spliceosome	1.3399e-07	20	Q9VM49 Q9U3Z7 Q95RE4 Q9V3W7 Q9W255 O18640 P11147 Q9VQK7 Q9V3P3 O44437 Q9VVU6 Q9V4Q8 Q9VWP1 Q7KMJ6 Q9VND7 Q9VYQ9 Q94901 Q9VFT4 Q9VHS8 Q94535
44265	cellular macromolecule catabolic process	1.3446e-07	20	Q9XZ61 Q9VJJ0 Q9XYZ5 Q7KUA4 A0AQH0 Q95083 Q9VUJ1 O77430 P12881 Q9VWP1 Q9XZJ4 P22769 Q7K148 P35122 Q7KSM5 P25822 Q9V5C6 O18413 P40304 Q9VKZ8
9308	amine metabolic process	0.003964	20	Q9VR79 O01404 Q9VTW1 P29310 Q9VKI8 Q9VHA2 Q9VQL1 Q6AWN0 Q9U616 Q9VIE7 Q7JXZ2 Q9VW68 Q9V9T5 P20228 B7Z0X1 Q9V3F8 Q9VNX4 Q9VN95 P20477 Q9VRD9
6950	response to stress	0.0041035	20	GST1_DROME SODM_DROME PSA3_DROME 1433E_DROME DDB1_DROME PSA71_DROME TYDP1_DROME PCNA_DROME PRDX1_DROME DNAJ1_DROME HSP26_DROME HSP7A_DROME PSA6_DROME HSP27_DROME TRXR1_DROME GSH1_DROME HSP23_DROME IF4A_DROME HSP83_DROME PRS8_DROME
50877	neurological system process	0.0044577	20	HSP7D_DROME 1433E_DROME PGK_DROME PUM_DROME DCE_DROME STAU_DROME SNAP_DROME FKB59_DROME GNAQ_DROME 1433Z_DROME OB99A_DROME HOW_DROME EXOC4_DROME PP12_DROME DRK_DROME PHM_DROME OB99B_DROME TPIS_DROME FREQ_DROME SPTCA_DROME
3008	system process	0.006259	20	HSP7D_DROME 1433E_DROME PGK_DROME PUM_DROME DCE_DROME STAU_DROME SNAP_DROME FKB59_DROME GNAQ_DROME 1433Z_DROME OB99A_DROME HOW_DROME EXOC4_DROME PP12_DROME DRK_DROME PHM_DROME OB99B_DROME TPIS_DROME FREQ_DROME SPTCA_DROME
51082	unfolded protein binding	1.7277e-12	19	Q9VK69 Q9VPQ2 P11147 P12613 Q9VXQ5 Q9VMH8 O77277 Q9VU35 Q9TVP3 Q9VW56 Q24133 Q9VTE5 P02828 Q7K3J0 Q9W392 P48604 Q9VGP6 P48605 P29843
51603	proteolysis involved in cellular protein catabolic process	7.4371e-09	19	Q9XZ61 Q9VJJ0 Q9XYZ5 Q7KUA4 A0AQH0 Q95083 Q9VUJ1 O77430 P12881 Q9VWP1 Q9XZJ4 P22769 Q7K148 P35122 Q7KSM5 Q9V5C6 O18413 P40304 Q9VKZ8
44257	cellular protein catabolic process	7.4371e-09	19	Q9XZ61 Q9VJJ0 Q9XYZ5 Q7KUA4 A0AQH0 Q95083 Q9VUJ1 O77430 P12881 Q9VWP1 Q9XZJ4 P22769 Q7K148 P35122 Q7KSM5 Q9V5C6 O18413 P40304 Q9VKZ8
44106	cellular amine metabolic process	3.3155e-06	19	O01404 Q9VTW1 P29310 Q9VKI8 Q9VHA2 Q9VQL1 Q6AWN0 Q9U616 Q9VIE7 Q7JXZ2 Q9VW68 Q9V9T5 P20228 B7Z0X1 Q9V3F8 Q9VNX4 Q9VN95 P20477 Q9VRD9
46907	intracellular transport	0.00814	19	Q9VRV8 Q9VN44 Q9V455 Q9V895 P52295 Q9VZ23 Q7KNM2 Q27268 Q9VQQ6 Q24253 A1Z8P9 Q9V8R9 Q23983 Q9U6R9 O97182 Q94901 Q9W1X4 P48604 Q9Y0Y5
8092	cytoskeletal protein binding	4.2498e-08	18	ANX11_DROME CADF_DROME MLC2_DROME HTS_DROME JUPIT_DROME PNUT_DROME AN32A_DROME STAU_DROME GELS_DROME ENA_DROME WDR1_DROME SQH_DROME ANXB9_DROME 41_DROME ANX10_DROME NDKA_DROME SPTCA_DROME HSP23_DROME
15031	protein transport	0.00065737	18	Q9VRV8 Q9VN44 Q9V455 P52295 Q9VZ23 Q9VNH6 Q7KNM2 Q9VQQ6 Q24253 A1Z8P9 Q8T0Q4 Q9V8R9 Q23983 Q9U6R9 Q9VLB7 Q9W1X4 Q9VVA7 P48604
45184	establishment of protein localization	0.00094146	18	Q9VRV8 Q9VN44 Q9V455 P52295 Q9VZ23 Q9VNH6 Q7KNM2 Q9VQQ6 Q24253 A1Z8P9 Q8T0Q4 Q9V8R9 Q23983 Q9U6R9 Q9VLB7 Q9W1X4 Q9VVA7 P48604
70727	cellular macromolecule localization	0.0016733	18	Q9VRV8 Q9VN44 Q9VGH5 Q9V455 Q7KN62 P52295 Q9VZ23 Q7KNM2 Q9VQQ6 Q24253 A1Z8P9 Q9V8R9 Q23983 P02828 Q9U6R9 P48809 Q9W1X4 P48604
7389	pattern specification process	0.0068936	18	1433E_DROME DSH_DROME CADF_DROME PUM_DROME STAU_DROME BRAT_DROME 1433Z_DROME 2ABA_DROME DRK_DROME ANXB9_DROME SQD_DROME 41_DROME HDAC1_DROME RB27C_DROME TMEDA_DROME TERA_DROME IF4A_DROME HSP83_DROME
3729	mRNA binding	3.5461e-08	17	DDX17_DROME ROA1_DROME FBRL_DROME PUM_DROME U2AF1_DROME RB97D_DROME NH2L1_DROME LARK_DROME STAU_DROME RB87F_DROME HOW_DROME ELAV_DROME SQD_DROME RB27C_DROME NELFA_DROME RU2A_DROME IF4A_DROME
42623	ATPase activity, coupled	3.2913e-05	17	VATD1_DROME DDX3_DROME DDX17_DROME DYLT_DROME MLC2_DROME ATPO_DROME VATE_DROME TCPA_DROME DDX6_DROME VATG_DROME SQH_DROME VATB_DROME DDX1_DROME TCPG_DROME TERA_DROME IF4A_DROME HSP83_DROME
50793	regulation of developmental process	0.00037148	17	ANX11_DROME DSH_DROME PUM_DROME RAN_DROME LARK_DROME STAU_DROME BRAT_DROME PP2A_DROME GNAQ_DROME ENA_DROME 2ABA_DROME DRK_DROME RB27C_DROME TERA_DROME SPTCA_DROME IF4A_DROME HSP83_DROME
30030	cell projection organization	0.002732	17	HSP7D_DROME DSH_DROME CADF_DROME PUM_DROME BRAT_DROME ARMET_DROME GNAQ_DROME ENA_DROME GROU_DROME TBB3_DROME PP12_DROME WDR1_DROME SQH_DROME 41_DROME HDAC1_DROME RB27C_DROME SPTCA_DROME
2165	instar larval or pupal development	0.0047582	17	DDX3_DROME DSH_DROME CADF_DROME CBPD_DROME IMPE2_DROME SNAP_DROME HOW_DROME WDR1_DROME PPIA_DROME SQH_DROME DRK_DROME OB99B_DROME 41_DROME HCD2_DROME SPTCA_DROME IF4A_DROME IF5A_DROME
9791	post-embryonic development	0.0069425	17	DDX3_DROME DSH_DROME CADF_DROME CBPD_DROME IMPE2_DROME SNAP_DROME HOW_DROME WDR1_DROME PPIA_DROME SQH_DROME DRK_DROME OB99B_DROME 41_DROME HCD2_DROME SPTCA_DROME IF4A_DROME IF5A_DROME
3002	regionalization	0.0078845	17	1433E_DROME DSH_DROME CADF_DROME PUM_DROME STAU_DROME BRAT_DROME 2ABA_DROME DRK_DROME ANXB9_DROME SQD_DROME 41_DROME HDAC1_DROME RB27C_DROME TMEDA_DROME TERA_DROME IF4A_DROME HSP83_DROME
43623	cellular protein complex assembly	2.1561e-09	16	P06603 Q7K4B3 P06604 P45594 P52295 Q24560 Q23983 Q9U6R9 O97182 Q7K2G1 Q9W1X4 P61857 P08841 Q8MST5 P23257 Q7JRJ9
71013	catalytic step 2 spliceosome	3.6849e-06	16	Q9VM49 Q95RE4 Q9V3W7 Q9W255 O18640 P11147 Q9VQK7 Q9V3P3 O44437 Q9VVU6 Q9V4Q8 Q9VND7 Q9VYQ9 Q94901 Q9VFT4 Q9VHS8
6520	cellular amino acid metabolic process	3.3885e-05	16	P29310 Q9VKI8 Q9VQL1 Q6AWN0 Q9U616 Q9VIE7 Q7JXZ2 Q9VW68 Q9V9T5 P20228 B7Z0X1 Q9V3F8 Q9VNX4 Q9VN95 P20477 Q9VRD9
7281	germ cell development	4.4998e-05	16	DDX3_DROME 1433E_DROME IMA_DROME PUM_DROME DYLT_DROME RB97D_DROME HTS_DROME STAU_DROME 1433Z_DROME SQD_DROME RB27C_DROME TMEDA_DROME TERA_DROME SPTCA_DROME IF4A_DROME HSP83_DROME
48666	neuron development	0.0040143	16	HSP7D_DROME DSH_DROME CADF_DROME PUM_DROME PNUT_DROME BRAT_DROME ARMET_DROME GNAQ_DROME ENA_DROME GROU_DROME TBB3_DROME PP12_DROME HDAC1_DROME RB27C_DROME TERA_DROME SPTCA_DROME
16192	vesicle-mediated transport	0.0056269	16	HSP7D_DROME CBPD_DROME PNUT_DROME TCPA_DROME PFD2_DROME SNAP_DROME BRAT_DROME PP2A_DROME GELS_DROME EXOC4_DROME PP12_DROME 2AAA_DROME WDR1_DROME NECAP_DROME TMEDA_DROME ATX2_DROME
46483	heterocycle metabolic process	0.00881	16	P54611 P08879 P29310 Q9W2X6 P31409 Q8T4C4 Q9W3U9 Q9VIE7 Q9V3I1 Q9V7D2 Q9V3F8 Q24439 Q9VNX4 Q9Y0Y2 Q9VEP6 Q9VC18
32561	guanyl ribonucleotide binding	2.7693e-07	15	128UP_DROME TBA1_DROME RAN_DROME TBB1_DROME PNUT_DROME PURA_DROME GNAQ_DROME TBG1_DROME TBB3_DROME GNL3_DROME SEPT2_DROME NDKA_DROME TBA2_DROME TBB2_DROME SEPT1_DROME
5525	GTP binding	2.7693e-07	15	128UP_DROME TBA1_DROME RAN_DROME TBB1_DROME PNUT_DROME PURA_DROME GNAQ_DROME TBG1_DROME TBB3_DROME GNL3_DROME SEPT2_DROME NDKA_DROME TBA2_DROME TBB2_DROME SEPT1_DROME
19001	guanyl nucleotide binding	3.2317e-07	15	128UP_DROME TBA1_DROME RAN_DROME TBB1_DROME PNUT_DROME PURA_DROME GNAQ_DROME TBG1_DROME TBB3_DROME GNL3_DROME SEPT2_DROME NDKA_DROME TBA2_DROME TBB2_DROME SEPT1_DROME
19941	modification-dependent protein catabolic process	8.9495e-07	15	Q9XZ61 Q9XYZ5 Q7KUA4 Q95083 O77430 P12881 Q9VWP1 Q9XZJ4 P22769 P35122 Q7KSM5 Q9V5C6 O18413 P40304 Q9VKZ8
43632	modification-dependent macromolecule catabolic process	1.0245e-06	15	Q9XZ61 Q9XYZ5 Q7KUA4 Q95083 O77430 P12881 Q9VWP1 Q9XZJ4 P22769 P35122 Q7KSM5 Q9V5C6 O18413 P40304 Q9VKZ8
9628	response to abiotic stimulus	4.1905e-05	15	1433E_DROME IMA_DROME DCE_DROME FKB59_DROME PP2A_DROME GNAQ_DROME DNAJ1_DROME HSP26_DROME HSP7A_DROME TBB3_DROME PP12_DROME HSP27_DROME TPIS_DROME HSP23_DROME HSP83_DROME
5759	mitochondrial matrix	0.000391	15	Q9VGP7 P91929 Q7JXC4 Q9VU35 Q9VW68 Q9V9T5 Q9VSA3 Q7JR58 Q9VNX4 Q0KHZ6 Q00637 Q9V9E3 Q9W086 P48604 Q94522
31980	mitochondrial lumen	0.000391	15	Q9VGP7 P91929 Q7JXC4 Q9VU35 Q9VW68 Q9V9T5 Q9VSA3 Q7JR58 Q9VNX4 Q0KHZ6 Q00637 Q9V9E3 Q9W086 P48604 Q94522
6753	nucleoside phosphate metabolic process	0.00079492	15	P54611 P08879 Q9VT32 Q9W2X6 P31409 Q8T4C4 Q9W3U9 Q9VIE7 Q9V3I1 Q8T079 Q9V7D2 Q24439 Q9Y0Y2 Q9VEP6 Q9VC18
9117	nucleotide metabolic process	0.00079492	15	P54611 P08879 Q9VT32 Q9W2X6 P31409 Q8T4C4 Q9W3U9 Q9VIE7 Q9V3I1 Q8T079 Q9V7D2 Q24439 Q9Y0Y2 Q9VEP6 Q9VC18
61024	membrane organization	0.0017838	15	LAM0_DROME CBPD_DROME TCPA_DROME PFD2_DROME SNAP_DROME BRAT_DROME PP2A_DROME GELS_DROME PP12_DROME 2AAA_DROME WDR1_DROME NECAP_DROME TERA_DROME SPTCA_DROME ATX2_DROME
16044	cellular membrane organization	0.0017838	15	LAM0_DROME CBPD_DROME TCPA_DROME PFD2_DROME SNAP_DROME BRAT_DROME PP2A_DROME GELS_DROME PP12_DROME 2AAA_DROME WDR1_DROME NECAP_DROME TERA_DROME SPTCA_DROME ATX2_DROME
6928	cellular component movement	0.0025337	15	HSP7D_DROME DSH_DROME CADF_DROME PUM_DROME BRAT_DROME GNAQ_DROME ENA_DROME HOW_DROME TBB3_DROME PP12_DROME SQH_DROME SQD_DROME RB27C_DROME NDKA_DROME SPTCA_DROME
55086	nucleobase, nucleoside and nucleotide metabolic process	0.0027825	15	P54611 P08879 Q9VT32 Q9W2X6 P31409 Q8T4C4 Q9W3U9 Q9VIE7 Q9V3I1 Q8T079 Q9V7D2 Q24439 Q9Y0Y2 Q9VEP6 Q9VC18
16874	ligase activity	0.0041886	15	Q7KN85 Q9V3S9 Q9W3K5 Q7KNM2 Q9VQL1 Q9VRL1 Q9VUR4 Q9VIE7 Q45VV3 Q9V9T5 Q9VVA7 P20477 Q9Y0Y2 Q94522 Q8T0L3
6886	intracellular protein transport	0.0014481	14	Q9VRV8 Q9VN44 Q9V455 P52295 Q9VZ23 Q7KNM2 Q9VQQ6 Q24253 A1Z8P9 Q9V8R9 Q23983 Q9U6R9 Q9W1X4 P48604
34613	cellular protein localization	0.0021498	14	Q9VRV8 Q9VN44 Q9V455 P52295 Q9VZ23 Q7KNM2 Q9VQQ6 Q24253 A1Z8P9 Q9V8R9 Q23983 Q9U6R9 Q9W1X4 P48604
48037	cofactor binding	0.0028144	14	Q9VMW9 Q9VKI8 Q9VMI3 Q7JXZ2 Q9VW68 P20228 Q8T079 Q9VSA3 B7Z0X1 Q9XTL9 Q9VLS4 B7Z001 P07487 Q9VRD9
51239	regulation of multicellular organismal process	0.0045582	14	DSH_DROME PUM_DROME LARK_DROME STAU_DROME BRAT_DROME PP2A_DROME GNAQ_DROME 2ABA_DROME GNL3_DROME RB27C_DROME FREQ_DROME TERA_DROME SPTCA_DROME HSP83_DROME
12505	endomembrane system	0.0046243	14	Q7JXF5 Q9VRV8 Q76NQ0 Q9VN44 P08928 Q9V455 P52295 Q24253 Q7K2X8 A1Z8P9 Q8SX89 Q9W1X4 Q9VXB0 Q9Y0Y5
10605	negative regulation of macromolecule metabolic process	0.0048107	14	DDX3_DROME DDX17_DROME HSP7D_DROME ROA1_DROME PUM_DROME LAM0_DROME GROU_DROME ELAV_DROME CTBP_DROME SQD_DROME HDAC1_DROME RB27C_DROME NELFA_DROME CSN4_DROME
31175	neuron projection development	0.0048107	14	HSP7D_DROME DSH_DROME CADF_DROME PUM_DROME BRAT_DROME ARMET_DROME GNAQ_DROME ENA_DROME GROU_DROME TBB3_DROME PP12_DROME HDAC1_DROME RB27C_DROME SPTCA_DROME
51716	cellular response to stimulus	0.0049412	14	SODM_DROME PSA3_DROME 1433E_DROME DDB1_DROME PSA71_DROME TYDP1_DROME PCNA_DROME GNAQ_DROME PRDX1_DROME PSA6_DROME TRXR1_DROME GSH1_DROME IF4A_DROME PRS8_DROME
9892	negative regulation of metabolic process	0.0072661	14	DDX3_DROME DDX17_DROME HSP7D_DROME ROA1_DROME PUM_DROME LAM0_DROME GROU_DROME ELAV_DROME CTBP_DROME SQD_DROME HDAC1_DROME RB27C_DROME NELFA_DROME CSN4_DROME
10608	posttranscriptional regulation of gene expression	2.8543e-07	13	DDX3_DROME DDX17_DROME HSP7D_DROME PUM_DROME EIF3K_DROME STAU_DROME BRAT_DROME 1433Z_DROME SQD_DROME RB27C_DROME CSN4_DROME DDX1_DROME IF5A_DROME
22	mitotic spindle elongation	1.088e-06	13	P55841 P50882 Q9V597 Q9VJ19 Q9V436 P12982 Q7K148 A8DZ29 P48149 Q9VBN5 P46222 Q9VJY6 Q02748
51231	spindle elongation	1.2761e-06	13	P55841 P50882 Q9V597 Q9VJ19 Q9V436 P12982 Q7K148 A8DZ29 P48149 Q9VBN5 P46222 Q9VJY6 Q02748
6511	ubiquitin-dependent protein catabolic process	1.9006e-05	13	Q9XZ61 Q9XYZ5 Q95083 O77430 P12881 Q9VWP1 Q9XZJ4 P22769 P35122 Q9V5C6 O18413 P40304 Q9VKZ8
1700	embryonic development via the syncytial blastoderm	0.00037877	13	HSP7D_DROME DSH_DROME MO25_DROME PUM_DROME NMT_DROME ENA_DROME VATG_DROME 2ABA_DROME SQH_DROME DRK_DROME CTBP_DROME 41_DROME DDX1_DROME
6119	oxidative phosphorylation	0.0004871	13	P54611 Q9VV75 Q9W2X6 P91929 P31409 Q8T4C4 Q9VMI3 Q9VMB9 Q9V7D2 Q9VJZ4 Q24439 Q0KHZ6 Q9VF27
9792	embryonic development ending in birth or egg hatching	0.00055522	13	HSP7D_DROME DSH_DROME MO25_DROME PUM_DROME NMT_DROME ENA_DROME VATG_DROME 2ABA_DROME SQH_DROME DRK_DROME CTBP_DROME 41_DROME DDX1_DROME
33554	cellular response to stress	0.00073666	13	SODM_DROME PSA3_DROME 1433E_DROME DDB1_DROME PSA71_DROME TYDP1_DROME PCNA_DROME PRDX1_DROME PSA6_DROME TRXR1_DROME GSH1_DROME IF4A_DROME PRS8_DROME
9165	nucleotide biosynthetic process	0.001123	13	P54611 P08879 Q9VT32 Q9W2X6 P31409 Q8T4C4 Q9W3U9 Q9VIE7 Q9V7D2 Q24439 Q9Y0Y2 Q9VEP6 Q9VC18
34404	nucleobase, nucleoside and nucleotide biosynthetic process	0.0020838	13	P54611 P08879 Q9VT32 Q9W2X6 P31409 Q8T4C4 Q9W3U9 Q9VIE7 Q9V7D2 Q24439 Q9Y0Y2 Q9VEP6 Q9VC18
34654	nucleobase, nucleoside, nucleotide and nucleic acid biosynthetic process	0.0020838	13	P54611 P08879 Q9VT32 Q9W2X6 P31409 Q8T4C4 Q9W3U9 Q9VIE7 Q9V7D2 Q24439 Q9Y0Y2 Q9VEP6 Q9VC18
3779	actin binding	1.1288e-06	12	GELS_DROME ENA_DROME ANX11_DROME WDR1_DROME CADF_DROME ANXB9_DROME 41_DROME HTS_DROME ANX10_DROME PNUT_DROME SPTCA_DROME HSP23_DROME
30036	actin cytoskeleton organization	3.6614e-05	12	ENA_DROME GROU_DROME WDR1_DROME CADF_DROME DRK_DROME RAN_DROME GBB1_DROME HTS_DROME PNUT_DROME LARK_DROME PP2A_DROME HSP83_DROME
6461	protein complex assembly	4.1739e-05	12	ELP2_DROME TBG1_DROME TBB3_DROME IMA_DROME TBA1_DROME CADF_DROME NU214_DROME ADRM1_DROME TBB1_DROME TBA2_DROME TBB2_DROME SNAP_DROME
70271	protein complex biogenesis	4.1739e-05	12	ELP2_DROME TBG1_DROME TBB3_DROME IMA_DROME TBA1_DROME CADF_DROME NU214_DROME ADRM1_DROME TBB1_DROME TBA2_DROME TBB2_DROME SNAP_DROME
30029	actin filament-based process	4.4526e-05	12	ENA_DROME GROU_DROME WDR1_DROME CADF_DROME DRK_DROME RAN_DROME GBB1_DROME HTS_DROME PNUT_DROME LARK_DROME PP2A_DROME HSP83_DROME
51301	cell division	0.00018085	12	CADF_DROME SQH_DROME PUM_DROME GBB1_DROME HTS_DROME SEPT2_DROME PNUT_DROME STAU_DROME SEPT1_DROME SNAP_DROME BRAT_DROME IF4A_DROME
6974	response to DNA damage stimulus	0.00021163	12	PRDX1_DROME PSA3_DROME 1433E_DROME PSA6_DROME DDB1_DROME PSA71_DROME TYDP1_DROME TRXR1_DROME GSH1_DROME IF4A_DROME PCNA_DROME PRS8_DROME
44282	small molecule catabolic process	0.00025477	12	P20228 Q8T079 P52034 Q9VSA3 Q7JR58 Q9VL70 Q9VKX2 Q01604 P52029 P07487 Q9U616 Q9VAN7
6164	purine nucleotide biosynthetic process	0.00085796	12	P54611 P08879 Q9V7D2 Q9W2X6 P31409 Q24439 Q8T4C4 Q9W3U9 Q9Y0Y2 Q9VIE7 Q9VEP6 Q9VC18
6163	purine nucleotide metabolic process	0.0010656	12	P54611 P08879 Q9V7D2 Q9W2X6 P31409 Q24439 Q8T4C4 Q9W3U9 Q9Y0Y2 Q9VIE7 Q9VEP6 Q9VC18
45165	cell fate commitment	0.0016691	12	1433Z_DROME 1433E_DROME DSH_DROME DRK_DROME PUM_DROME GBB1_DROME HTS_DROME STAU_DROME SPTCA_DROME BRAT_DROME PP2A_DROME HSP83_DROME
40011	locomotion	0.0050581	12	ENA_DROME HOW_DROME PP12_DROME IMA_DROME CADF_DROME SQH_DROME PUM_DROME SQD_DROME RB27C_DROME NDKA_DROME PYG_DROME GNAQ_DROME
10324	membrane invagination	0.0064071	12	GELS_DROME PP12_DROME 2AAA_DROME WDR1_DROME NECAP_DROME CBPD_DROME TCPA_DROME PFD2_DROME SNAP_DROME ATX2_DROME BRAT_DROME PP2A_DROME
6897	endocytosis	0.0064071	12	GELS_DROME PP12_DROME 2AAA_DROME WDR1_DROME NECAP_DROME CBPD_DROME TCPA_DROME PFD2_DROME SNAP_DROME ATX2_DROME BRAT_DROME PP2A_DROME
9309	amine biosynthetic process	2.2471e-07	11	Q9VTW1 B7Z0X1 Q9V3F8 P29310 Q9VNX4 Q9VN95 Q9VKI8 Q9VHA2 P20477 Q6AWN0 Q9VRD9
3924	GTPase activity	3.0972e-05	11	TBG1_DROME TBB3_DROME TBA1_DROME RAN_DROME GBB1_DROME SEPT2_DROME TBB1_DROME TBA2_DROME TBB2_DROME SEPT1_DROME GNAQ_DROME
8135	translation factor activity, nucleic acid binding	5.0718e-05	11	Q9VL18 A8DZ29 Q9GU68 Q9VCK0 P20232 Q9VK85 A1Z9E3 Q02748 Q9VHS8 Q9W2D9 P56538
9994	oocyte differentiation	9.1476e-05	11	1433Z_DROME 1433E_DROME SQD_DROME HTS_DROME RB27C_DROME TMEDA_DROME TERA_DROME STAU_DROME SPTCA_DROME ATX2_DROME HSP83_DROME
16853	isomerase activity	0.00020269	11	Q3YMU0 Q9VGK3 P54399 Q9W5W8 Q9W0H8 Q9V438 P25007 Q9VL78 P52029 P29613 Q9VAN7
9260	ribonucleotide biosynthetic process	0.0010386	11	P54611 P08879 Q9VT32 Q9V7D2 Q9W2X6 P31409 Q24439 Q8T4C4 Q9VIE7 Q9VEP6 Q9VC18
9259	ribonucleotide metabolic process	0.0011219	11	P54611 P08879 Q9VT32 Q9V7D2 Q9W2X6 P31409 Q24439 Q8T4C4 Q9VIE7 Q9VEP6 Q9VC18
6911	phagocytosis, engulfment	0.0013124	11	GELS_DROME PP12_DROME 2AAA_DROME WDR1_DROME CBPD_DROME TCPA_DROME PFD2_DROME SNAP_DROME ATX2_DROME BRAT_DROME PP2A_DROME
6909	phagocytosis	0.0020512	11	GELS_DROME PP12_DROME 2AAA_DROME WDR1_DROME CBPD_DROME TCPA_DROME PFD2_DROME SNAP_DROME ATX2_DROME BRAT_DROME PP2A_DROME
9798	axis specification	0.0022163	11	1433Z_DROME 1433E_DROME DRK_DROME PUM_DROME SQD_DROME RB27C_DROME TMEDA_DROME TERA_DROME STAU_DROME IF4A_DROME HSP83_DROME
19725	cellular homeostasis	0.0026276	11	Q9VVJ7 Q3YMU0 Q7KRU8 P54399 Q9XZ63 P41044 Q9VQI7 Q9V3P0 Q9V438 Q9VLS4 Q9VJZ6
45595	regulation of cell differentiation	0.0032116	11	2ABA_DROME DSH_DROME PUM_DROME RB27C_DROME TERA_DROME STAU_DROME SPTCA_DROME BRAT_DROME IF4A_DROME PP2A_DROME GNAQ_DROME
44455	mitochondrial membrane part	0.0060377	11	Q9VV75 Q9VMB9 Q9VHW4 Q9W2X6 Q9VJZ4 P91929 Q24439 P12613 Q8T4C4 Q9VMI3 Q9VF27
4298	threonine-type endopeptidase activity	3.8155e-09	10	Q9XZJ4 Q9VJJ0 P22769 Q7K148 A0AQH0 Q9V5C6 Q95083 Q9VUJ1 P40304 P12881
70003	threonine-type peptidase activity	3.8155e-09	10	Q9XZJ4 Q9VJJ0 P22769 Q7K148 A0AQH0 Q9V5C6 Q95083 Q9VUJ1 P40304 P12881
5839	proteasome core complex	9.4421e-09	10	Q9XZJ4 Q9VJJ0 P22769 Q7K148 A0AQH0 Q9V5C6 Q95083 Q9VUJ1 P40304 P12881
7015	actin filament organization	4.6003e-06	10	ENA_DROME GROU_DROME WDR1_DROME CADF_DROME DRK_DROME RAN_DROME GBB1_DROME HTS_DROME PP2A_DROME HSP83_DROME
22626	cytosolic ribosome	1.8371e-05	10	RL9_DROME RL24_DROME RL14_DROME RL36_DROME RSSA_DROME RL11_DROME RL31_DROME RS15A_DROME RS21_DROME RS2_DROME
6913	nucleocytoplasmic transport	3.1162e-05	10	A1Z8P9 Q9VRV8 Q9VN44 Q9V455 Q9V895 P52295 Q9VZ23 Q9W1X4 Q7KNM2 Q27268
51169	nuclear transport	3.1162e-05	10	A1Z8P9 Q9VRV8 Q9VN44 Q9V455 Q9V895 P52295 Q9VZ23 Q9W1X4 Q7KNM2 Q27268
5635	nuclear envelope	3.9151e-05	10	A1Z8P9 Q7JXF5 Q9VRV8 Q9VN44 P08928 Q9V455 P52295 Q8SX89 Q9W1X4 Q7K2X8
33043	regulation of organelle organization	6.0698e-05	10	ENA_DROME 1433E_DROME 2ABA_DROME DSH_DROME TBA1_DROME SQH_DROME HCF_DROME TBA2_DROME SPTCA_DROME ATX2_DROME
32268	regulation of cellular protein metabolic process	7.619e-05	10	PUM_DROME HCF_DROME SQD_DROME EIF3K_DROME RB27C_DROME CSN4_DROME DDX1_DROME STAU_DROME BRAT_DROME IF5A_DROME
19318	hexose metabolic process	0.00037177	10	Q8T079 P52034 Q9VKX2 Q9XTL9 Q9VMW9 Q9VLS1 Q01604 P52029 P07487 Q9VAN7
3735	structural constituent of ribosome	0.00097089	10	RL9_DROME RL24_DROME RL14_DROME RL36_DROME RSSA_DROME RL11_DROME RL31_DROME RS15A_DROME RS21_DROME RS2_DROME
15078	hydrogen ion transmembrane transporter activity	0.0010794	10	P54611 Q9VV75 Q9VMB9 Q9V7D2 Q9W2X6 P31409 Q24439 P12613 Q8T4C4 Q9XZH6
5996	monosaccharide metabolic process	0.0012336	10	Q8T079 P52034 Q9VKX2 Q9XTL9 Q9VMW9 Q9VLS1 Q01604 P52029 P07487 Q9VAN7
51246	regulation of protein metabolic process	0.0023877	10	PUM_DROME HCF_DROME SQD_DROME EIF3K_DROME RB27C_DROME CSN4_DROME DDX1_DROME STAU_DROME BRAT_DROME IF5A_DROME
9152	purine ribonucleotide biosynthetic process	0.0024828	10	P54611 P08879 Q9V7D2 Q9W2X6 P31409 Q24439 Q8T4C4 Q9VIE7 Q9VEP6 Q9VC18
15934	large ribosomal subunit	0.002556	10	P55841 P50882 Q9VGP7 P49630 Q9V597 Q9VJ19 Q9VBN5 P46222 Q9VJY6 Q9W086
9150	purine ribonucleotide metabolic process	0.0026686	10	P54611 P08879 Q9V7D2 Q9W2X6 P31409 Q24439 Q8T4C4 Q9VIE7 Q9VEP6 Q9VC18
33279	ribosomal subunit	0.0028808	10	RL9_DROME RL24_DROME RL14_DROME RL36_DROME RSSA_DROME RL11_DROME RL31_DROME RS15A_DROME RS21_DROME RS2_DROME
5840	ribosome	0.0058947	10	RL9_DROME RL24_DROME RL14_DROME RL36_DROME RSSA_DROME RL11_DROME RL31_DROME RS15A_DROME RS21_DROME RS2_DROME
1505	regulation of neurotransmitter levels	0.0070429	10	P20228 Q23983 P13395 Q9U6R9 Q9W1I8 Q9VLB7 P11147 Q9VNH6 Q24253 P37236
30707	ovarian follicle cell development	0.0099583	10	ENA_DROME RBP9X_DROME DSH_DROME CADF_DROME SQH_DROME MCM6_DROME SQD_DROME RB27C_DROME SPTCA_DROME PCNA_DROME
51258	protein polymerization	1.1642e-08	9	P06603 P06604 O97182 P45594 P61857 Q24560 P08841 Q8MST5 P23257
50684	regulation of mRNA processing	3.8061e-06	9	DDX17_DROME HOW_DROME ROA1_DROME U2AF1_DROME ELAV_DROME SQD_DROME RB27C_DROME IF4A_DROME RB87F_DROME
44087	regulation of cellular component biogenesis	4.3883e-05	9	ENA_DROME DSH_DROME CADF_DROME PUM_DROME RB27C_DROME TERA_DROME STAU_DROME SPTCA_DROME ATX2_DROME
6006	glucose metabolic process	0.00012027	9	Q8T079 P52034 Q9VKX2 Q9XTL9 Q9VLS1 Q01604 P52029 P07487 Q9VAN7
7308	oocyte construction	0.00063638	9	1433Z_DROME 1433E_DROME SQD_DROME RB27C_DROME TMEDA_DROME TERA_DROME STAU_DROME SPTCA_DROME HSP83_DROME
48599	oocyte development	0.00089969	9	1433Z_DROME 1433E_DROME SQD_DROME RB27C_DROME TMEDA_DROME TERA_DROME STAU_DROME SPTCA_DROME HSP83_DROME
48469	cell maturation	0.0013123	9	1433Z_DROME 1433E_DROME SQD_DROME RB27C_DROME TMEDA_DROME TERA_DROME STAU_DROME SPTCA_DROME HSP83_DROME
21700	developmental maturation	0.0020542	9	1433Z_DROME 1433E_DROME SQD_DROME RB27C_DROME TMEDA_DROME TERA_DROME STAU_DROME SPTCA_DROME HSP83_DROME
60284	regulation of cell development	0.0029651	9	2ABA_DROME PUM_DROME RB27C_DROME TERA_DROME STAU_DROME SPTCA_DROME BRAT_DROME PP2A_DROME GNAQ_DROME
6605	protein targeting	0.0050578	9	A1Z8P9 Q9VRV8 Q9V8R9 Q9VN44 Q9V455 P52295 Q9W1X4 Q7KNM2 P48604
48732	gland development	0.0055104	9	SMD3_DROME IMA_DROME DSH_DROME PPIA_DROME OB99B_DROME 41_DROME RS21_DROME TBB2_DROME IF5A_DROME
6066	alcohol metabolic process	0.0055104	9	G6PI_DROME PGK_DROME GLYR1_DROME GMDS_DROME PHM_DROME HCD2_DROME PYG_DROME G3P2_DROME KPBB_DROME
22603	regulation of anatomical structure morphogenesis	0.006657	9	ENA_DROME ANX11_DROME DSH_DROME DRK_DROME RAN_DROME SPTCA_DROME PP2A_DROME HSP83_DROME GNAQ_DROME
8652	cellular amino acid biosynthetic process	3.9057e-06	8	B7Z0X1 Q9V3F8 Q9VNX4 Q9VN95 Q9VKI8 P20477 Q6AWN0 Q9VRD9
5874	microtubule	4.4685e-06	8	TBG1_DROME TBB3_DROME TBA1_DROME RAN_DROME TBB1_DROME NDKA_DROME TBA2_DROME TBB2_DROME
5643	nuclear pore	9.3974e-06	8	A1Z8P9 Q7JXF5 Q9VRV8 Q9VN44 Q9V455 P52295 Q9W1X4 Q7K2X8
46930	pore complex	9.3974e-06	8	A1Z8P9 Q7JXF5 Q9VRV8 Q9VN44 Q9V455 P52295 Q9W1X4 Q7K2X8
6417	regulation of translation	2.5512e-05	8	PUM_DROME SQD_DROME EIF3K_DROME RB27C_DROME DDX1_DROME STAU_DROME BRAT_DROME IF5A_DROME
48024	regulation of nuclear mRNA splicing, via spliceosome	2.8739e-05	8	DDX17_DROME HOW_DROME ROA1_DROME U2AF1_DROME SQD_DROME RB27C_DROME IF4A_DROME RB87F_DROME
43484	regulation of RNA splicing	3.6224e-05	8	DDX17_DROME HOW_DROME ROA1_DROME U2AF1_DROME SQD_DROME RB27C_DROME IF4A_DROME RB87F_DROME
5200	structural constituent of cytoskeleton	5.1117e-05	8	P06603 P06604 P61857 Q24560 P08841 Q8MST5 P23257 Q0KIE7
44275	cellular carbohydrate catabolic process	0.00016731	8	Q8T079 P52034 Q9VKX2 Q9XTL9 Q01604 P52029 P07487 Q9VAN7
8553	hydrogen-exporting ATPase activity, phosphorylative mechanism	0.00021385	8	P54611 Q9V7D2 Q9W2X6 P31409 Q24439 P12613 Q8T4C4 Q9XZH6
22625	cytosolic large ribosomal subunit	0.00035408	8	P55841 P50882 P49630 Q9V597 Q9VJ19 Q9VBN5 P46222 Q9VJY6
17038	protein import	0.00051094	8	A1Z8P9 Q9VRV8 Q9VN44 Q9V455 P52295 Q9W1X4 Q7KNM2 P48604
46394	carboxylic acid biosynthetic process	0.00051094	8	B7Z0X1 Q9V3F8 Q9VNX4 Q9VN95 Q9VKI8 P20477 Q6AWN0 Q9VRD9
16053	organic acid biosynthetic process	0.00051094	8	B7Z0X1 Q9V3F8 Q9VNX4 Q9VN95 Q9VKI8 P20477 Q6AWN0 Q9VRD9
8360	regulation of cell shape	0.000746	8	ENA_DROME ANX11_DROME DSH_DROME DRK_DROME RAN_DROME SPTCA_DROME PP2A_DROME HSP83_DROME
6575	cellular amino acid derivative metabolic process	0.00082665	8	P20228 O01404 Q9VTW1 P29310 Q9GU68 Q9VHA2 Q9W3K5 Q9VW68
16469	proton-transporting two-sector ATPase complex	0.0012384	8	P54611 Q9V7D2 Q9W2X6 P31409 Q24439 P12613 Q8T4C4 Q9XZH6
1751	compound eye photoreceptor cell differentiation	0.0017496	8	1433Z_DROME DSH_DROME DRK_DROME CSN4_DROME PNUT_DROME TERA_DROME PP2A_DROME HSP83_DROME
1754	eye photoreceptor cell differentiation	0.0021768	8	1433Z_DROME DSH_DROME DRK_DROME CSN4_DROME PNUT_DROME TERA_DROME PP2A_DROME HSP83_DROME
7309	oocyte axis specification	0.0022955	8	1433Z_DROME 1433E_DROME SQD_DROME RB27C_DROME TMEDA_DROME TERA_DROME STAU_DROME HSP83_DROME
22604	regulation of cell morphogenesis	0.0034378	8	ENA_DROME ANX11_DROME DSH_DROME DRK_DROME RAN_DROME SPTCA_DROME PP2A_DROME HSP83_DROME
46530	photoreceptor cell differentiation	0.0039648	8	1433Z_DROME DSH_DROME DRK_DROME CSN4_DROME PNUT_DROME TERA_DROME PP2A_DROME HSP83_DROME
8283	cell proliferation	0.0041536	8	1433Z_DROME IMA_DROME MCM2_DROME GBB1_DROME HTS_DROME STAU_DROME SPTCA_DROME BRAT_DROME
33365	protein localization in organelle	0.004995	8	A1Z8P9 Q9VRV8 Q9VN44 Q9V455 P52295 Q9W1X4 Q7KNM2 P48604
16052	carbohydrate catabolic process	0.0053973	8	Q8T079 P52034 Q9VKX2 Q9XTL9 Q01604 P52029 P07487 Q9VAN7
9141	nucleoside triphosphate metabolic process	0.0083528	8	P54611 P08879 Q9V7D2 Q9W2X6 P31409 Q24439 Q8T4C4 Q9V3I1
30532	small nuclear ribonucleoprotein complex	0.00942	8	Q9U3Z7 Q9VCE3 Q9W1V3 Q9VQK7 O44437 Q9VVU6 Q9V4Q8 Q94535
6606	protein import into nucleus	1.4406e-05	7	A1Z8P9 Q9VRV8 Q9VN44 Q9V455 P52295 Q9W1X4 Q7KNM2
51170	nuclear import	1.9141e-05	7	A1Z8P9 Q9VRV8 Q9VN44 Q9V455 P52295 Q9W1X4 Q7KNM2
22624	proteasome accessory complex	1.9299e-05	7	Q9XZ61 Q9V3V6 Q7KLV9 Q9V436 Q9V3P3 O18413 Q9W414
34504	protein localization in nucleus	2.509e-05	7	A1Z8P9 Q9VRV8 Q9VN44 Q9V455 P52295 Q9W1X4 Q7KNM2
33178	proton-transporting two-sector ATPase complex, catalytic domain	5.5397e-05	7	P54611 Q9V7D2 Q9W2X6 P31409 Q24439 Q8T4C4 Q9XZH6
381	regulation of alternative nuclear mRNA splicing, via spliceosome	0.0001018	7	DDX17_DROME HOW_DROME ROA1_DROME U2AF1_DROME SQD_DROME IF4A_DROME RB87F_DROME
19320	hexose catabolic process	0.0003595	7	Q8T079 P52034 Q9VKX2 Q01604 P52029 P07487 Q9VAN7
46365	monosaccharide catabolic process	0.0003595	7	Q8T079 P52034 Q9VKX2 Q01604 P52029 P07487 Q9VAN7
6007	glucose catabolic process	0.0003595	7	Q8T079 P52034 Q9VKX2 Q01604 P52029 P07487 Q9VAN7
9266	response to temperature stimulus	0.00080764	7	DNAJ1_DROME HSP26_DROME HSP7A_DROME HSP27_DROME HSP23_DROME HSP83_DROME GNAQ_DROME
46164	alcohol catabolic process	0.00098823	7	Q8T079 P52034 Q9VKX2 Q01604 P52029 P07487 Q9VAN7
7611	learning or memory	0.0010884	7	1433Z_DROME 1433E_DROME PP12_DROME DRK_DROME PUM_DROME PHM_DROME STAU_DROME
51297	centrosome organization	0.001438	7	Q7K148 P02828 Q9VXQ5 P36179 O77430 P23696 P23257
6261	DNA-dependent DNA replication	0.0020335	7	Q9V461 Q9VIH1 P17917 Q9VGW6 Q02748 O77430 P49735
3743	translation initiation factor activity	0.002112	7	A8DZ29 Q9GU68 Q9VCK0 Q02748 Q9VHS8 Q9W2D9 P56538
6413	translational initiation	0.0022694	7	A8DZ29 Q9GU68 Q9VCK0 Q02748 Q9VHS8 Q9W2D9 P56538
31023	microtubule organizing center organization	0.0022694	7	Q7K148 P02828 Q9VXQ5 P36179 O77430 P23696 P23257
45454	cell redox homeostasis	0.0025259	7	Q9VVJ7 Q3YMU0 P54399 Q9VQI7 Q9V3P0 Q9V438 Q9VJZ6
70647	protein modification by small protein conjugation or removal	0.002804	7	Q9XZ61 Q9XYZ5 Q7KUA4 P35122 Q7KSM5 Q9V345 Q9VIE7
3682	chromatin binding	0.0041537	7	Q8MRC7 Q7JN06 Q9V461 Q9VCU6 P50535 Q9VGW6 P49735
7018	microtubule-based movement	0.0042456	7	TBB3_DROME DCTN2_DROME TBA1_DROME DYLT_DROME TBB1_DROME TBA2_DROME TBB2_DROME
6818	hydrogen transport	0.0054607	7	P54611 Q9V7D2 Q9W2X6 P31409 Q24439 Q8T4C4 Q9XZH6
15992	proton transport	0.0054607	7	P54611 Q9V7D2 Q9W2X6 P31409 Q24439 Q8T4C4 Q9XZH6
51093	negative regulation of developmental process	0.0063567	7	2ABA_DROME DSH_DROME LARK_DROME BRAT_DROME IF4A_DROME PP2A_DROME GNAQ_DROME
43067	regulation of programmed cell death	0.0076668	7	RL14_DROME VIAF1_DROME PNUT_DROME RIR1_DROME SEPT1_DROME API5_DROME GNAQ_DROME
71103	DNA conformation change	0.0082813	7	Q9W1G7 Q9VGW6 Q02748 O77430 Q7JRJ9 P49735 P12982
7163	establishment or maintenance of cell polarity	0.0095732	7	2ABA_DROME DSH_DROME CADF_DROME SQD_DROME 41_DROME TYDP1_DROME NDKA_DROME
50662	coenzyme binding	0.0098171	7	GLYR1_DROME GMDS_DROME CTBP_DROME ACADM_DROME TRXR1_DROME G3P2_DROME IDH3A_DROME
1709	cell fate determination	0.0099927	7	1433Z_DROME 1433E_DROME PUM_DROME HTS_DROME STAU_DROME SPTCA_DROME BRAT_DROME
45298	tubulin complex	8.678e-09	6	TBG1_DROME TBB3_DROME TBA1_DROME TBB1_DROME TBA2_DROME TBB2_DROME
5832	chaperonin-containing T-complex	5.2639e-08	6	Q9VK69 Q7K3J0 Q9W392 P12613 Q9VXQ5 P48605
45171	intercellular bridge	7.2673e-07	6	1433Z_DROME 1433E_DROME HTS_DROME SEPT2_DROME PNUT_DROME SEPT1_DROME
45172	germline ring canal	7.2673e-07	6	1433Z_DROME 1433E_DROME HTS_DROME SEPT2_DROME PNUT_DROME SEPT1_DROME
51087	chaperone binding	2.7018e-06	6	Q9VUC1 Q9VTE5 P11147 P48604 Q9VGP6 Q9VW56
4722	protein serine/threonine phosphatase activity	7.7251e-05	6	PP12_DROME 2AAA_DROME 2ABA_DROME PP11_DROME PP4C_DROME PP2A_DROME
16860	intramolecular oxidoreductase activity	0.00014886	6	Q3YMU0 P54399 Q9W5W8 Q9V438 P52029 P29613
5838	proteasome regulatory particle	0.00015568	6	Q9XZ61 Q9V3V6 Q7KLV9 Q9V436 O18413 Q9W414
44448	cell cortex part	0.00048932	6	EXOC4_DROME SEPT2_DROME PNUT_DROME STAU_DROME SEPT1_DROME SPTCA_DROME
6096	glycolysis	0.00064903	6	P52034 Q9VKX2 Q01604 P52029 P07487 Q9VAN7
8017	microtubule binding	0.00077626	6	JUPIT_DROME NDKA_DROME PNUT_DROME AN32A_DROME STAU_DROME SPTCA_DROME
15631	tubulin binding	0.0010822	6	JUPIT_DROME NDKA_DROME PNUT_DROME AN32A_DROME STAU_DROME SPTCA_DROME
30170	pyridoxal phosphate binding	0.0014786	6	P20228 B7Z0X1 Q9XTL9 Q9VRD9 Q7JXZ2 Q9VW68
70279	vitamin B6 binding	0.0014786	6	P20228 B7Z0X1 Q9XTL9 Q9VRD9 Q7JXZ2 Q9VW68
7293	germarium-derived egg chamber formation	0.0015214	6	1433Z_DROME 1433E_DROME IMA_DROME SQD_DROME HTS_DROME SPTCA_DROME
9408	response to heat	0.0015214	6	DNAJ1_DROME HSP26_DROME HSP7A_DROME HSP27_DROME HSP23_DROME HSP83_DROME
15662	ATPase activity, coupled to transmembrane movement of ions, phosphorylative mechanism	0.0022506	6	VATD1_DROME VATG_DROME VATB_DROME ATPO_DROME VATE_DROME TCPA_DROME
42625	ATPase activity, coupled to transmembrane movement of ions	0.0033036	6	VATD1_DROME VATG_DROME VATB_DROME ATPO_DROME VATE_DROME TCPA_DROME
6470	protein amino acid dephosphorylation	0.0053211	6	PP12_DROME 2AAA_DROME 2ABA_DROME PP11_DROME PP4C_DROME PP2A_DROME
6732	coenzyme metabolic process	0.0056446	6	GLYR1_DROME SUCA_DROME HCD2_DROME GSH1_DROME MTDC_DROME IDH3A_DROME
51640	organelle localization	0.0059823	6	EXOC4_DROME PP12_DROME DCTN2_DROME SQH_DROME LAM0_DROME PNUT_DROME
4721	phosphoprotein phosphatase activity	0.0061308	6	PP12_DROME 2AAA_DROME 2ABA_DROME PP11_DROME PP4C_DROME PP2A_DROME
5938	cell cortex	0.006202	6	EXOC4_DROME SEPT2_DROME PNUT_DROME STAU_DROME SEPT1_DROME SPTCA_DROME
910	cytokinesis	0.0078951	6	CADF_DROME SQH_DROME SEPT2_DROME PNUT_DROME SEPT1_DROME SNAP_DROME
70925	organelle assembly	0.0082355	6	A1Z8P9 P36179 P23696 P56538 Q7JRJ9 P12982

## Sheet: Down 1.6-fold
GO-ID	Description	p-value	N	Protein names
5488	binding	0.0009989	56	Q9W124 Q9V3V2 Q9VJG2 Q59E09 P14318 P39736 A1Z850 Q24400 Q7K511 Q7KM08 Q24325 Q7KV27 Q9VCR3 Q9V9J3 Q9VLT3 Q9VMV5 B7Z002 Q8INH5 Q9W1H3 O77477 Q9VTL5 A1ZBW6 Q05913 Q9VB46 Q9VCW6 Q9I7F7 Q9W261 A1Z9I5 P22700 A1Z909 Q9VUS0 O97479 Q9VT00 Q9W266 Q9VT41 Q9VYW4 Q9NCC3 Q9V419 Q8SX81 Q23979 Q23978 P84249 P26675 Q9W3V2 Q7KN74 P91927 Q05783 A1Z843 P18432 O61604 Q9VMD9 P14199 Q9VG81 A1Z9S6 A1Z803 P02299
3824	catalytic activity	0.040995	38	Q7K4C7 Q9W543 O97479 Q9V3V2 Q9Y128 Q9VRS6 A8JV25 Q59E09 Q9VZW7 Q9VBC7 Q9VYW4 P35415 Q9V419 Q24048 Q7K511 Q7KM08 Q24325 Q7KV27 Q9V9J3 Q23979 Q23978 B7Z002 Q8SXU3 Q9VM18 Q9VIF2 Q8INH5 Q9VTL5 P18432 Q05913 Q7JS69 Q9VG81 Q9VB46 A1Z803 Q9VCW6 Q9I7F7 Q9W261 P22700 A1Z909
5623	cell	0.038819	24	ATC1_DROME TNNT_DROME SOS_DROME MY31D_DROME MLR_DROME BX42_DROME MLP2_DROME LBR_DROME MY61F_DROME NRT_DROME T2FA_DROME MYSP1_DROME ATPB2_DROME TPM2_DROME C28A5_DROME H3_DROME SRC42_DROME TAF2_DROME RTF1_DROME H33_DROME A60DA_DROME REF2P_DROME MP20_DROME UZIP_DROME
44464	cell part	0.038819	24	ATC1_DROME TNNT_DROME SOS_DROME MY31D_DROME MLR_DROME BX42_DROME MLP2_DROME LBR_DROME MY61F_DROME NRT_DROME T2FA_DROME MYSP1_DROME ATPB2_DROME TPM2_DROME C28A5_DROME H3_DROME SRC42_DROME TAF2_DROME RTF1_DROME H33_DROME A60DA_DROME REF2P_DROME MP20_DROME UZIP_DROME
5622	intracellular	0.034046	20	ATC1_DROME TNNT_DROME SOS_DROME MY31D_DROME MLR_DROME BX42_DROME MLP2_DROME LBR_DROME MY61F_DROME T2FA_DROME MYSP1_DROME TPM2_DROME H3_DROME SRC42_DROME TAF2_DROME RTF1_DROME H33_DROME A60DA_DROME REF2P_DROME MP20_DROME
43229	intracellular organelle	0.0055538	18	ATC1_DROME TNNT_DROME MY31D_DROME MLR_DROME BX42_DROME MLP2_DROME LBR_DROME MY61F_DROME T2FA_DROME MYSP1_DROME TPM2_DROME H3_DROME TAF2_DROME RTF1_DROME H33_DROME A60DA_DROME REF2P_DROME MP20_DROME
43226	organelle	0.0056397	18	ATC1_DROME TNNT_DROME MY31D_DROME MLR_DROME BX42_DROME MLP2_DROME LBR_DROME MY61F_DROME T2FA_DROME MYSP1_DROME TPM2_DROME H3_DROME TAF2_DROME RTF1_DROME H33_DROME A60DA_DROME REF2P_DROME MP20_DROME
46872	metal ion binding	0.037748	17	Q9VUS0 O97479 Q9V3V2 P91927 P14318 Q8INH5 P18432 Q9V419 A1Z850 O61604 Q24400 P14199 Q8SX81 Q7KM08 Q24325 Q9VCR3 A1Z803
43169	cation binding	0.049342	17	Q9VUS0 O97479 Q9V3V2 P91927 P14318 Q8INH5 P18432 Q9V419 A1Z850 O61604 Q24400 P14199 Q8SX81 Q7KM08 Q24325 Q9VCR3 A1Z803
43167	ion binding	0.049614	17	Q9VUS0 O97479 Q9V3V2 P91927 P14318 Q8INH5 P18432 Q9V419 A1Z850 O61604 Q24400 P14199 Q8SX81 Q7KM08 Q24325 Q9VCR3 A1Z803
44422	organelle part	0.00055189	15	ATC1_DROME TNNT_DROME MY31D_DROME MLR_DROME BX42_DROME MLP2_DROME LBR_DROME MY61F_DROME T2FA_DROME MYSP1_DROME TPM2_DROME H3_DROME TAF2_DROME H33_DROME A60DA_DROME
44446	intracellular organelle part	0.0019397	14	ATC1_DROME TNNT_DROME MY31D_DROME MLR_DROME BX42_DROME LBR_DROME MY61F_DROME T2FA_DROME MYSP1_DROME TPM2_DROME H3_DROME TAF2_DROME H33_DROME A60DA_DROME
5515	protein binding	0.00043313	12	ATC1_DROME PR2_DROME TNNT_DROME SOS_DROME MY31D_DROME BX42_DROME TPM2_DROME MLP2_DROME SRC42_DROME LBR_DROME MY61F_DROME MP20_DROME
30554	adenyl nucleotide binding	0.03075	11	Q7K511 Q7KM08 Q59E09 Q9V9J3 Q23979 Q23978 Q9I7F7 Q9VTL5 Q9VYW4 P22700 B7Z002
1883	purine nucleoside binding	0.031528	11	Q7K511 Q7KM08 Q59E09 Q9V9J3 Q23979 Q23978 Q9I7F7 Q9VTL5 Q9VYW4 P22700 B7Z002
1882	nucleoside binding	0.033128	11	Q7K511 Q7KM08 Q59E09 Q9V9J3 Q23979 Q23978 Q9I7F7 Q9VTL5 Q9VYW4 P22700 B7Z002
32991	macromolecular complex	0.04658	11	MYSP1_DROME TNNT_DROME MY31D_DROME MLR_DROME ATPB2_DROME BX42_DROME H3_DROME TAF2_DROME H33_DROME MY61F_DROME T2FA_DROME
43232	intracellular non-membrane-bounded organelle	0.0021301	10	MYSP1_DROME TNNT_DROME MY31D_DROME MLR_DROME TPM2_DROME MLP2_DROME H3_DROME H33_DROME MY61F_DROME MP20_DROME
43228	non-membrane-bounded organelle	0.0021301	10	MYSP1_DROME TNNT_DROME MY31D_DROME MLR_DROME TPM2_DROME MLP2_DROME H3_DROME H33_DROME MY61F_DROME MP20_DROME
30234	enzyme regulator activity	0.014188	7	Q29QE1 Q9VQQ0 Q7JV69 Q9VCW6 Q9VLT3 A1Z9I5 P26675
22804	active transmembrane transporter activity	0.019492	7	Q9VKC9 Q24048 Q7JS69 P91927 Q9V4E7 Q9VYW4 P22700
43292	contractile fiber	5.6357e-11	6	MYSP1_DROME TNNT_DROME MLR_DROME TPM2_DROME MLP2_DROME MP20_DROME
15629	actin cytoskeleton	2.6712e-07	6	MYSP1_DROME TNNT_DROME MY31D_DROME MLR_DROME TPM2_DROME MY61F_DROME
17111	nucleoside-triphosphatase activity	0.0022441	6	ATC1_DROME MYSP1_DROME MY31D_DROME MLR_DROME ATPB2_DROME MY61F_DROME
16462	pyrophosphatase activity	0.0024344	6	ATC1_DROME MYSP1_DROME MY31D_DROME MLR_DROME ATPB2_DROME MY61F_DROME
16817	hydrolase activity, acting on acid anhydrides	0.0025679	6	ATC1_DROME MYSP1_DROME MY31D_DROME MLR_DROME ATPB2_DROME MY61F_DROME
16818	hydrolase activity, acting on acid anhydrides, in phosphorus-containing anhydrides	0.0025679	6	ATC1_DROME MYSP1_DROME MY31D_DROME MLR_DROME ATPB2_DROME MY61F_DROME
44430	cytoskeletal part	0.0046244	6	MYSP1_DROME TNNT_DROME MY31D_DROME MLR_DROME TPM2_DROME MY61F_DROME
5856	cytoskeleton	0.0071843	6	MYSP1_DROME TNNT_DROME MY31D_DROME MLR_DROME TPM2_DROME MY61F_DROME
3677	DNA binding	0.018576	6	SOS_DROME HMGD_DROME H3_DROME RTF1_DROME H33_DROME T2FA_DROME
44459	plasma membrane part	0.031179	6	Q24048 Q7JS69 Q9W543 Q9V9J3 P23654 Q9V4E7
44449	contractile fiber part	4.2909e-09	5	MYSP1_DROME TNNT_DROME MLR_DROME TPM2_DROME MLP2_DROME
8092	cytoskeletal protein binding	0.00018232	5	TNNT_DROME MY31D_DROME TPM2_DROME MY61F_DROME MP20_DROME
42623	ATPase activity, coupled	0.00095748	5	ATC1_DROME MY31D_DROME MLR_DROME ATPB2_DROME MY61F_DROME
46873	metal ion transmembrane transporter activity	0.0014477	5	Q9VKC9 Q24048 Q7JS69 Q9V4E7 P22700
16887	ATPase activity	0.0015637	5	ATC1_DROME MY31D_DROME MLR_DROME ATPB2_DROME MY61F_DROME
22890	inorganic cation transmembrane transporter activity	0.019426	5	Q9VKC9 Q24048 Q7JS69 Q9V4E7 P22700
5811	lipid particle	0.024908	5	Q9VG81 Q9VB46 Q9VIX7 Q9VMV5 P22700
5524	ATP binding	0.028949	5	ATC1_DROME PR2_DROME MY31D_DROME SRC42_DROME MY61F_DROME
32559	adenyl ribonucleotide binding	0.029106	5	ATC1_DROME PR2_DROME MY31D_DROME SRC42_DROME MY61F_DROME
30017	sarcomere	2.3155e-07	4	MYSP1_DROME TNNT_DROME TPM2_DROME MLP2_DROME
30016	myofibril	2.9702e-07	4	MYSP1_DROME TNNT_DROME TPM2_DROME MLP2_DROME
16459	myosin complex	1.9424e-06	4	MYSP1_DROME MY31D_DROME MLR_DROME MY61F_DROME
3774	motor activity	4.8683e-05	4	MYSP1_DROME MY31D_DROME MLR_DROME MY61F_DROME
3779	actin binding	0.00021584	4	MY31D_DROME TPM2_DROME MY61F_DROME MP20_DROME
5509	calcium ion binding	0.0014365	4	TNNT_DROME MLR_DROME A60DA_DROME MP20_DROME
15081	sodium ion transmembrane transporter activity	0.0025153	4	Q9VKC9 Q24048 Q7JS69 Q9V4E7
43492	ATPase activity, coupled to movement of substances	0.020836	4	Q24048 Q7JS69 Q9VYW4 P22700
42626	ATPase activity, coupled to transmembrane movement of substances	0.020836	4	Q24048 Q7JS69 Q9VYW4 P22700
16820	hydrolase activity, acting on acid anhydrides, catalyzing transmembrane movement of substances	0.020836	4	Q24048 Q7JS69 Q9VYW4 P22700
785	chromatin	0.021067	4	A1Z9S6 P84249 B7Z002 P02299
15405	P-P-bond-hydrolysis-driven transmembrane transporter activity	0.035031	4	Q24048 Q7JS69 Q9VYW4 P22700
15399	primary active transmembrane transporter activity	0.035031	4	Q24048 Q7JS69 Q9VYW4 P22700
15077	monovalent inorganic cation transmembrane transporter activity	0.042267	4	Q9VKC9 Q24048 Q7JS69 Q9V4E7
8047	enzyme activator activity	0.026178	3	Q29QE1 Q9VQQ0 A1Z9I5
5083	small GTPase regulator activity	0.044126	3	Q29QE1 A1Z9I5 P26675
44421	extracellular region part	0.048364	3	Q9VMD9 Q9VLT3 Q9VMV5
